# Supplementary material for: A RING-Type E3 Ubiquitin Ligase, OsGW2, Controls Chlorophyll Content and Dark-Induced Senescence in Rice
Source: Int J Mol Sci. 2020 Mar 2;21(5):1704. doi: 10.3390/ijms21051704 (PMC7084548; doi:10.3390/ijms21051704)
Supplement: Supplementary file 1 [file ijms-21-01704-s001.zip › Supplementary_table.xlsx]

## Sheet: Supplementary_table1
Supplementary_table 1 Primer list used in this study
Name		Sequence (5' to 3')	Note
RM11302	F	CTTAGGCCCACATTTGATGTCC	SSR
	R	CCCATCGTTTGCTCATATTCC	SSR
RM5	F	CACACTCCCATGCTAACAACTGG	SSR
	R	CATCAAGAAGAGCAGTCCTGTGC	SSR
RM11315	F	CATGAGGTTCTGAGTGGATCACC	SSR
	R	TCGATCGATCACGTACCAGTCC	SSR
RM3390	F	AGGATCATTCTTGGCCTCTTGG	SSR
	R	TCCTGCTTTCCATGCTTGTGC	SSR
RM12813	F	TATTATGCAAGGGAGGGAGTACATGC	SSR
	R	GTTGCTTGACTCGTTGACACTCC	SSR
RM7144	F	CTTGTCAAGGGGTTAACTCG	SSR
	R	AGCCAGTCTTCACAGCACTG	SSR
RM7288	F	CGCTATGTGGCAGTTTAAGAGC	SSR
	R	CTGTTGGAATCAAAGTGAGTGC	SSR
RM12983	F	ACTTGGCTAGTTCATGCAAACC	SSR
	R	ACCATGGTATAGTCCCTACTAACTCC	SSR
RM5390	F	ATGACCCAATTTCTGACTCTAGCC	SSR
	R	CATGGGTGGTGCTGTAGATGG	SSR
RM584	F	TATGTGGTTGGCTTGCCTAGTGG	SSR
	R	TGCCCATATGGTCTGGATGTGC	SSR
RM24903	F	GAGATCTGACAAGGAAGGAAGG	SSR
	R	CCCTTGCAAGATTCTACTACTGG	SSR
RM216	F	GATGGTAAAGGAAGAACGTGTGC	SSR
	R	CACTCATAGACGCATCACATAGCC	SSR
RM239	F	TACAAAATGCTGGGTACCCC	SSR
	R	ACATATGGGACCCACCTGTC	SSR
GW2_LP	F	CATCGACCAGAAGAAGCTCC	T-DNA insertion
GW2_RP	R	AAGCAGAATTGCAATAAAATTGC	T-DNA insertion
RB	F	TTGGGGTTTCTACAGGACGTAAC	T-DNA insertion
GW2_CDS	F	ATGGGGAACAGGATAGGGGGGAG	GW2 coding region
	R	CTACAACCATGCCAACCCTTGCGAG	GW2 coding region
OsGW2_RT	F	TTTCAGTGCCGTCATACCGATG	qRT_PCR
	R	AGCTCTCCAGATTACACATGC	qRT_PCR
NYC1	F	CATGCAACACCAACAAAAGG	qRT_PCR
	R	GACCATTCCAGGAGAAGCAG	qRT_PCR
SGR	F	AGGGGTGGTACAACAAGCTG	qRT_PCR
	R	GCTCCTTGCGGAAGATGTAG	qRT_PCR
RCCR1	F	CGCATTTCCTCATGGAATTT	qRT_PCR
	R	CTTCTCACGCTGTTTGTCCA	qRT_PCR
Osh36	F	GCACGGAGGCGAACGA	qRT_PCR
	R	TTGAGCGGTAGCACCCATT	qRT_PCR
OsI57	F	ACCCTAAAGTAAATGAAGTC	qRT_PCR
	R	CCTGCTCTTGTCTTGTTA	qRT_PCR
OsNAP	F	CAAGAAGCCGAACGGTTC	qRT_PCR
	R	GTTAGAGTGGAGCAGCAT	qRT_PCR
NOL	F	ATCAACAATGCTGGATCAAATGC	qRT_PCR
	R	TTCCATCAGAACCAGCACCATCG	qRT_PCR
PaO	F	TGGTAACAGCCAACCTGACTGG	qRT_PCR
	R	ATCCCAGCAGTTGCACAGAACG	qRT_PCR
OsUBQ5	F	GAAGTAAGGAAGGAGGAGGA	qRT_PCR
	R	AAGGTGTTCAGTTCCAAGG	qRT_PCR
OsJAZ1	F	TGCCGATCGCGAGGAA	qRT_PCR
	R	GGTTCGCTCGTTGTCGTGAT	qRT_PCR
OsERF136	F	ACAGCCACTGCTGGTACTAcg	qRT_PCR
	R	TGCGATTCCGAGGATGTC	qRT_PCR
OsPRR95	F	AACGAGAGGCTGCACTGA	qRT_PCR
	R	CTAGTAGCTTCCTGCTCTG	qRT_PCR
OsGLU	F	GCATACTTGTGAAGCACCGAAGTG	qRT_PCR
	R	CTGCAAATAGCAACCTAGCGTCAG	qRT_PCR
OsRR3	F	CAAGAGGGTCAAGGAGTCGG	qRT_PCR
	R	GACACATCAGACGGGCGAA	qRT_PCR
OsNIT1	F	GTTGCGGACAGCACTTTATG	qRT_PCR
	R	TGCTGACAGGACAAAGCATC	qRT_PCR
OsDWF1	F	AGCCGGACTGCAGCCATGG	qRT_PCR
	R	GCAGACCAGACATCGCCCAAATA	qRT_PCR
OsTCTP	F	CATTGGTGCCAACCCATC	qRT_PCR
	R	AAGGAGGTTGCTCCTGAAGA	qRT_PCR

## Sheet: Supplementary_table2
Supplementary_table # Summary of sequencing results and their mapping results in the Oryza sativa japonica cv. Nipponbare reference genome
Raw fastq	Total reads	Trimmed reads	Total-Trimed	Trimmed/Total (%)	GC content (%)	Mapping rate (%)
0GR1_1.fastq.gz	28078469	27941375	137094	99.5117	50	69.6771
0GR2_1.fastq.gz	24724126	24575165	148961	99.3975	50	60.4676
0GR3_1.fastq.gz	14619768	14490262	129506	99.1142	50	56.8619
0HR1_1.fastq.gz	14272610	14173312	99298	99.3043	51	59.8342
0HR2_1.fastq.gz	23835125	23668618	166507	99.3014	50	62.0921
0HR3_1.fastq.gz	14027733	13923603	104130	99.2577	49	64.3949
3GR1_1.fastq.gz	24444249	24290335	153914	99.3703	49	65.3867
3GR2_1.fastq.gz	25326793	25159328	167465	99.3388	48	72.4318
3GR3_1.fastq.gz	23146394	22934312	212082	99.0837	49	69.8813
3HR1_1.fastq.gz	25294963	25126048	168915	99.3322	49	67.1239
3HR2_1.fastq.gz	22859667	22715235	144432	99.3682	49	74.6892
3HR3_1.fastq.gz	23371092	23191993	179099	99.2337	48	74.8823

## Sheet: Supplementary_table3
Supplementary_table 3 Differentially expressed genes detected only in CR2002 under dark treatment
Gene	log2FC	Adjusted P-value	Description
Os11g0438700	10.4909	6.53e-05	Similar to Tropinone reductase-I (EC 1.1.1.206) (TR-I) (Tropine dehydrogenase). (Os11t0438700-01);Similar to Tropinone reductase-I (EC 1.1.1.206) (TR-I) (Tropine dehydrogenase). (Os11t0438700-02);Hypothetical conserved gene. (Os11t0438700-03)
Os07g0126301	9.06371	0.0432669	Allergen V5/Tpx-1 related family protein. (Os07t0126301-01)
Os07g0124900	9.06371	0.0432674	Allergen V5/Tpx-1 related family protein. (Os07t0124900-01)
Os07g0125500	9.06371	0.0432669	Allergen V5/Tpx-1 related family protein. (Os07t0125500-01)
Os04g0530500	8.82949	0.0140027	Zinc finger, RING/FYVE/PHD-type domain containing protein. (Os04t0530500-01);Zinc finger, RING/FYVE/PHD-type domain containing protein. (Os04t0530500-02)
Os11g0686900	7.99974	8.32e-05	Similar to NB-ARC domain containing protein, expressed. (Os11t0686900-00)
Os02g0218700	7.81626	0.0430933	Allene oxide synthase (CYP74A3), Fatty acid 9-/13-hydroperoxide lyase (CYP74C), Biosynthesis of jasmonic acid (JA), Plant defense (Os02t0218700-01)
Os04g0244400	7.21181	0.000569004	Thioredoxin fold domain containing protein. (Os04t0244400-01);Thioredoxin fold domain containing protein. (Os04t0244400-02)
Os11g0521900	6.80366	0.022069	Similar to NLI interacting factor-like phosphatase family protein, expressed. (Os11t0521900-01);Similar to NLI interacting factor-like phosphatase family protein, expressed. (Os11t0521900-02);Similar to NLI interacting factor-like phosphatase family protein, expressed. (Os11t0521900-03)
Os12g0576732	6.56275	0.0197754	Hypothetical gene. (Os12t0576732-01)
Os04g0629100	6.37555	0.0256088	Similar to H0303G06.16 protein. (Os04t0629100-01);Similar to H0303G06.16 protein. (Os04t0629100-02)
Os02g0804300	5.98095	0.0140961	Methyltransferase type 11 domain containing protein. (Os02t0804300-01);Similar to Methyltransferase WBSCR22. (Os02t0804300-02)
Os05g0249100	5.9604	0.00185046	Conserved hypothetical protein. (Os05t0249100-01);Hypothetical conserved gene. (Os05t0249100-02)
Os03g0851300	5.85516	0.000724011	Winged helix repressor DNA-binding domain containing protein. (Os03t0851300-01);Winged helix repressor DNA-binding domain containing protein. (Os03t0851300-02);Winged helix repressor DNA-binding domain containing protein. (Os03t0851300-03);Similar to 26S proteasome subunit RPN5b. (Os03t0851300-04)
Os12g0455100	5.73066	0.000167739	Hypothetical protein. (Os12t0455100-01)
Os04g0618200	5.71734	0.0151249	Similar to cDNA clone:J013046D23, full insert sequence. (Os04t0618200-01);Similar to H0313F03.11 protein. (Os04t0618200-02)
Os02g0192400	5.66018	0.0250758	Zinc finger, PHD-type domain containing protein. (Os02t0192400-01);Hypothetical conserved gene. (Os02t0192400-02)
Os02g0208400	5.65359	0.00376036	Hypothetical gene. (Os02t0208400-01);Hypothetical gene. (Os02t0208400-02)
Os02g0829600	5.59992	0.0267319	Zinc finger, RING/FYVE/PHD-type domain containing protein. (Os02t0829600-01);Similar to Sperm protamine P1 (Po1) [Contains: Sperm protamine P2 (Po2) (Main protamine)]. (Os02t0829600-02)
Os01g0698300	5.46053	0.0101443	Zinc finger, BED-type predicted domain containing protein. (Os01t0698300-01);Similar to transposon protein. (Os01t0698300-02)
Os01g0367100	5.38832	0.0322017	Chloroplast-localized UDP-glucose epimerase (UGE), Galactolipid biosynthesis for chloroplast membranes, Photosynthetic capability and carbon assimilate homeostasis (Os01t0367100-01);NAD(P)-binding domain containing protein. (Os01t0367100-02);Similar to binding / catalytic. (Os01t0367100-03);NAD(P)-binding domain containing protein. (Os01t0367100-04)
Os01g0257300	5.38143	0.0162025	Similar to FPF1. (Os01t0257300-01)
Os04g0205000	5.32924	0.000749606	Similar to Calmodulin. (Os04t0205000-00)
Os12g0437800	5.24506	0.0194632	Similar to MPI. (Os12t0437800-01)
Os07g0210000	5.23443	0.00195228	Hypothetical conserved gene. (Os07t0210000-01);Exo70 exocyst complex subunit domain containing protein. (Os07t0210000-02)
Os11g0691280	5.23037	0.0385607	EGF-type aspartate/asparagine hydroxylation site domain containing protein. (Os11t0691280-00)
Os11g0619800	5.17997	0.00231882	Kelch related domain containing protein. (Os11t0619800-01)
Os11g0701000	5.14046	0.000662467	Class III chitinase homologue (OsChib3H-c). (Os11t0701000-01)
Os07g0538350	5.03233	0.000258845	Hypothetical protein. (Os07t0538350-00)
Os09g0246300	5.0259	0.0223524	Hypothetical protein. (Os09t0246300-01);Conserved hypothetical protein. (Os09t0246300-02)
Os06g0547400	5.02304	0.0217721	Similar to Peroxidase P7 (EC 1.11.1.7) (TP7). (Os06t0547400-01)
Os12g0177200	5.01672	0.00155192	Conserved hypothetical protein. (Os12t0177200-01)
Os11g0658700	4.95123	0.0313674	MADS box transcription factor, Pollen maturation (Os11t0658700-01);MADS domain transcription factor, pollen maturation (Os11t0658700-02)
Os01g0353600	4.90471	0.000235824	Similar to AP-3 complex subunit sigma-2. (Os01t0353600-00)
Os02g0237100	4.89648	0.00439739	Similar to Spermine synthase. (Os02t0237100-01)
Os04g0551600	4.82843	0.0102073	Zinc finger, FYVE/PHD-type domain containing protein. (Os04t0551600-01)
Os01g0377000	4.78782	0.00169192	Cytochrome P450 family protein. (Os01t0377000-01)
Os03g0719900	4.78406	0.0146475	Similar to Peptide transporter 1. (Os03t0719900-01);Similar to Peptide transporter 1. (Os03t0719900-02);Similar to Peptide transporter. (Os03t0719900-03);Similar to Peptide transporter 1. (Os03t0719900-04)
Os11g0100800	4.75781	0.028776	Similar to Exo70 exocyst complex subunit family protein. (Os11t0100800-01)
Os02g0787700	4.75253	0.00528853	Hypothetical protein. (Os02t0787700-01)
Os10g0488400	4.71759	0.00361326	Protein of unknown function DUF761, plant domain containing protein. (Os10t0488400-01)
Os08g0293200	4.71443	0.000696273	F-box domain, cyclin-like domain containing protein. (Os08t0293200-01)
Os03g0376800	4.70689	0.0321227	K Homology, type 1, subgroup domain containing protein. (Os03t0376800-01);K Homology, type 1, subgroup domain containing protein. (Os03t0376800-02);K Homology, type 1, subgroup domain containing protein. (Os03t0376800-03);K Homology, type 1, subgroup domain containing protein. (Os03t0376800-04);Hypothetical conserved gene. (Os03t0376800-05)
Os06g0584200	4.69708	0.0338877	N-6 adenine-specific DNA methylase, conserved site domain containing protein. (Os06t0584200-01);N-6 adenine-specific DNA methylase, conserved site domain containing protein. (Os06t0584200-02);N-6 adenine-specific DNA methylase, conserved site domain containing protein. (Os06t0584200-03)
Os06g0586150	4.65488	0.0160812	Protein kinase, catalytic domain domain containing protein. (Os06t0586150-00)
Os01g0939700	4.56324	0.000741939	Similar to Esterase D (EC 3.1.1.1). (Os01t0939700-01);Similar to esterase D. (Os01t0939700-02)
Os01g0958900	4.52422	0.0342474	Similar to MLH1 protein (Fragment). (Os01t0958900-01);Similar to MLH1 protein (Fragment). (Os01t0958900-02)
Os04g0390800	4.52056	0.00108309	NAD(P)-binding domain containing protein. (Os04t0390800-01)
Os09g0254600	4.49399	0.00321026	Similar to seven-transmembrane-domain protein 1. (Os09t0254600-00)
Os09g0449700	4.47299	0.0255056	Hypothetical gene. (Os09t0449700-01)
Os04g0150300	4.43172	0.00186966	Conserved hypothetical protein. (Os04t0150300-01)
Os11g0504000	4.42534	0.00652809	Transposase, Ptta/En/Spm, plant domain containing protein. (Os11t0504000-00)
Os09g0431100	4.38584	0.0031766	GPCR, family 3, metabotropic glutamate receptor-like protein. (Os09t0431100-01)
Os05g0304701	4.36256	0.00560432	Hypothetical gene. (Os05t0304701-00)
Os07g0672300	4.34647	0.000763192	Protein of unknown function DUF247, plant domain containing protein. (Os07t0672300-00)
Os09g0295200	4.29519	0.013187	Conserved hypothetical protein. (Os09t0295200-01)
Os08g0411850	4.29391	0.0271985	Conserved hypothetical protein. (Os08t0411850-00)
Os11g0578000	4.26846	0.00951954	Similar to TCP-1/cpn60 chaperonin. (Os11t0578000-00)
Os08g0549200	4.24596	0.0357589	Glycoside hydrolase, family 35 protein. (Os08t0549200-01);Similar to Beta-galactosidase. (Os08t0549200-02)
Os02g0181700	4.22988	0.00317729	Conserved hypothetical protein. (Os02t0181700-00)
Os06g0694400	4.2022	0.0176462	Conserved hypothetical protein. (Os06t0694400-01);Conserved hypothetical protein. (Os06t0694400-02)
Os01g0962500	4.19528	0.00915705	Zinc finger, HIT-type domain containing protein. (Os01t0962500-01);Zinc finger, HIT-type domain containing protein. (Os01t0962500-02)
Os06g0114651	4.09565	0.0311274	Hypothetical gene. (Os06t0114651-00)
Os01g0318400	4.08865	0.00727949	Conserved hypothetical protein. (Os01t0318400-00)
Os06g0184766	4.07296	0.0401338	Hypothetical conserved gene. (Os06t0184766-00)
Os02g0617300	4.06365	0.027637	Similar to OSIGBa0157A06.7 protein. (Os02t0617300-01);Armadillo-like helical domain containing protein. (Os02t0617300-02)
Os09g0268600	4.04293	3.34e-05	Zinc finger, SWIM-type domain containing protein. (Os09t0268600-01)
Os10g0181700	4.01809	0.0205991	ATP-binding region, ATPase-like domain containing protein. (Os10t0181700-01);Hypothetical conserved gene. (Os10t0181700-02)
Os03g0216300	4.01634	0.00478051	Pentatricopeptide repeat domain containing protein. (Os03t0216300-01);Hypothetical conserved gene. (Os03t0216300-02)
Os01g0847100	4.00352	0.00825848	Conserved hypothetical protein. (Os01t0847100-01)
Os04g0390700	3.99661	0.00709316	Short-chain dehydrogenase/reductase SDR domain containing protein. (Os04t0390700-01)
Os06g0594300	3.98973	0.0326518	Hypothetical protein. (Os06t0594300-01)
Os06g0624100	3.97682	0.0064475	Similar to predicted protein. (Os06t0624100-00)
Os01g0536950	3.93795	0.0146272	Similar to Rust resistance protein rp3-1. (Os01t0536950-00)
Os09g0447500	3.92002	0.00452098	Cytochrome P450 family protein. (Os09t0447500-01)
Os02g0269650	3.90936	0.00252936	Hypothetical gene. (Os02t0269650-01)
Os11g0604900	3.90675	0.000243137	Similar to NB-ARC domain containing protein. (Os11t0604900-00)
Os11g0676050	3.89612	0.00685848	Similar to NB-ARC domain containing protein. (Os11t0676050-00)
Os03g0243250	3.89268	0.0295814	Hypothetical protein. (Os03t0243250-00)
CAA33911	3.88764	0.00620525	NADH dehydrogenase 49kDa protein
Os04g0481000	3.88469	0.0427335	Similar to H0510A06.1 protein. (Os04t0481000-00)
Os08g0203400	3.88283	0.00207304	Protein kinase, core domain containing protein. (Os08t0203400-01)
Os02g0801300	3.85334	0.0379299	Similar to Cyclin-B1-2. (Os02t0801300-01);Similar to Cyclin-B1-2. (Os02t0801300-02);Similar to Cyclin B. (Os02t0801300-03)
Os02g0826500	3.85131	0.0318304	ABC transporter-like domain containing protein. (Os02t0826500-01);Hypothetical conserved gene. (Os02t0826500-02);Hypothetical conserved gene. (Os02t0826500-03)
Os12g0156100	3.83747	0.01368	Similar to NAC-domain containing protein 90 (ANAC090). (Os12t0156100-01)
Os04g0480801	3.83736	0.00821076	Hypothetical gene. (Os04t0480801-01)
Os02g0197900	3.82491	0.0334294	Conserved hypothetical protein. (Os02t0197900-01);Conserved hypothetical protein. (Os02t0197900-02)
Os03g0168000	3.81675	0.0159491	Major facilitator superfamily, general substrate transporter domain containing protein. (Os03t0168000-01)
Os08g0529000	3.80471	0.0179652	Auxin efflux carrier, Auxin homeostasis, transport and distribution (Os08t0529000-01)
Os01g0654450	3.78653	0.0131325	Hypothetical gene. (Os01t0654450-00)
Os09g0418500	3.78556	0.000345702	Similar to CBL-interacting protein kinase 14. (Os09t0418500-00)
Os01g0703000	3.77705	0.033129	Similar to Poly(A) polymerase gamma (EC 2.7.7.19) (PAP gamma) (Polynucleotide adenylyltransferase gamma) (SRP RNA 3' adenylating enzyme). (Os01t0703000-01)
Os04g0494100	3.77002	0.0105142	Similar to Chitinase. (Os04t0494100-02)
Os01g0680650	3.74041	0.0122589	Hypothetical conserved gene. (Os01t0680650-00)
Os04g0615600	3.73734	0.00920732	Similar to H0525G02.3 protein. (Os04t0615600-01)
Os08g0153900	3.70693	0.0234826	Protein of unknown function DUF599 family protein. (Os08t0153900-01)
Os10g0107600	3.69683	0.00602587	Conserved hypothetical protein. (Os10t0107600-01)
Os07g0249100	3.66584	0.029172	Pentatricopeptide repeat domain containing protein. (Os07t0249100-01);Pentatricopeptide repeat domain containing protein. (Os07t0249100-02)
Os08g0530066	3.65913	0.0096593	Nucleotide-diphospho-sugar transferase domain containing protein. (Os08t0530066-00)
Os04g0446000	3.65725	0.0124536	Similar to OSIGBa0140O07.11 protein. (Os04t0446000-01)
Os02g0197300	3.65271	0.0320663	Similar to Monoculm1. (Os02t0197300-00)
Os05g0104200	3.64721	0.0375736	Polygalacturonase inhibiting protein, Inhibitor of fungal polygalacturonase, Sheath blight resistance (Os05t0104200-01)
Os02g0514150	3.62698	0.0216891	Hypothetical conserved gene. (Os02t0514150-00)
Os03g0257900	3.57903	0.0339349	Similar to Lectin-like receptor kinase 7;2. (Os03t0257900-01);Similar to Lectin-like receptor kinase 7;2. (Os03t0257900-02);Similar to Lectin-like receptor kinase 7;2. (Os03t0257900-03)
Os01g0795200	3.57529	0.0409175	Similar to Subtilase. (Os01t0795200-01)
Os11g0556132	3.56346	1.29e-05	Hypothetical protein. (Os11t0556132-00)
Os04g0690600	3.56013	0.023544	Similar to Auxin response factor 13. (Os04t0690600-01)
Os08g0512100	3.55522	0.0212508	Conserved hypothetical protein. (Os08t0512100-00)
Os01g0937100	3.52958	0.00257786	Similar to Xylanase inhibitor precursor (Xylanase inhibitor TAXI-I). (Os01t0937100-01)
Os11g0686500	3.52328	0.00238275	NB-ARC domain containing protein. (Os11t0686500-01)
Os05g0363500	3.50395	0.010858	Hypothetical conserved gene. (Os05t0363500-01)
Os10g0329900	3.47377	0.000534373	Similar to Protein kinase domain containing protein. (Os10t0329900-00)
Os11g0558900	3.45676	0.0237959	Leucine-rich repeat, N-terminal domain containing protein. (Os11t0558900-01)
Os10g0156300	3.45552	0.00319151	Hypothetical conserved gene. (Os10t0156300-01)
Os04g0366000	3.44138	0.00310949	Similar to OSIGBa0110B10.6 protein. (Os04t0366000-00)
Os01g0150800	3.42968	0.00505963	Protein-tyrosine phosphatase-like, PTPLA domain containing protein. (Os01t0150800-01)
Os06g0698711	3.37111	0.00325742	Conserved hypothetical protein. (Os06t0698711-01)
Os01g0221100	3.3642	0.00502121	GH3 auxin-responsive promoter family protein. (Os01t0221100-01);GH3 auxin-responsive promoter family protein. (Os01t0221100-02)
Os04g0135400	3.34167	0.00971059	Similar to OSIGBa0140L04.2 protein. (Os04t0135400-00)
Os02g0170701	3.30702	0.0153478	Conserved hypothetical protein. (Os02t0170701-00)
Os07g0569800	3.29974	0.0277224	Similar to protein kinase. (Os07t0569800-01)
Os02g0753900	3.28266	0.0101695	Hypothetical conserved gene. (Os02t0753900-01)
Os04g0617350	3.28145	0.00367096	Similar to H0313F03.3 protein. (Os04t0617350-00)
Os09g0334800	3.27255	0.0157389	Similar to protein kinase. (Os09t0334800-01)
Os11g0583200	3.25594	0.0102839	Hypothetical conserved gene. (Os11t0583200-01)
Os01g0923200	3.245	0.0176489	Similar to AT.I.24-6 protein (Fragment). (Os01t0923200-01)
Os11g0592200	3.23613	0.0481415	Similar to Chitin-binding allergen Bra r 2 (Fragments). (Os11t0592200-01)
Os03g0604432	3.22287	0.0451251	Hypothetical gene. (Os03t0604432-01)
Os07g0421932	3.22009	0.0290638	Hypothetical gene. (Os07t0421932-00)
Os03g0594600	3.21989	0.00355915	Similar to H0523F07.7 protein. (Os03t0594600-00)
Os11g0505300	3.21812	0.000359332	Sulfotransferase, Resistance to rice stripe virus (Os11t0505300-01)
Os09g0497100	3.21211	4.45e-06	Similar to Pumilio RBD (Fragment). (Os09t0497100-01)
Os01g0716300	3.21136	0.00877916	Conserved hypothetical protein. (Os01t0716300-00)
Os09g0246500	3.20168	0.0108978	Conserved hypothetical protein. (Os09t0246500-01)
Os06g0529900	3.19091	0.0445398	Hypothetical conserved gene. (Os06t0529900-00)
CAA33963	3.16636	0.00391553	PSII L protein
Os08g0231400	3.15927	3.95e-05	Germin-like protein 8-12, Disease resistance (Os08t0231400-01)
Os01g0512200	3.15304	0.0323077	Armadillo-type fold domain containing protein. (Os01t0512200-01);Clathrin/coatomer adaptor, adaptin-like, N-terminal domain containing protein. (Os01t0512200-02)
Os07g0642950	3.14378	0.0246558	Hypothetical gene. (Os07t0642950-00)
Os11g0706600	3.13326	0.0142398	Thaumatin-like protein. (Os11t0706600-00)
Os08g0556500	3.12637	0.00480557	Similar to predicted protein. (Os08t0556500-00)
Os02g0102000	3.11835	0.0487114	Similar to OSIGBa0134P10.4 protein. (Os02t0102000-00)
Os03g0800000	3.11082	0.0419636	Similar to Nitrate and chloride transporter. (Os03t0800000-01);Similar to nitrate and chloride transporter. (Os03t0800000-02)
Os07g0248100	3.08013	0.0255042	Hypothetical conserved gene. (Os07t0248100-01)
Os08g0468400	3.07561	0.0250839	Kinetochore protein Ndc80 domain containing protein. (Os08t0468400-01)
Os11g0170900	3.07342	0.00367398	Similar to BURP domain-containing protein 17. (Os11t0170900-01)
CAA33961	3.07285	0.00359596	cytochrome f
Os06g0106800	3.07183	0.00731054	Similar to glycoside hydrolase, family 28. (Os06t0106800-01);Similar to glycoside hydrolase, family 28. (Os06t0106800-02)
Os10g0566400	3.06175	0.00419563	Similar to RING-H2 finger protein ATL3J. (Os10t0566400-01)
Os01g0138400	3.05936	0.0379299	Serine/threonine protein kinase domain containing protein. (Os01t0138400-01)
Os07g0160100	3.04424	0.000106151	Similar to cDNA clone:J023038F18, full insert sequence. (Os07t0160100-01);YABBY family transcription factor, Stamen and carpel development, Feedback regulation of gibberellin biosynthesis (Os07t0160100-02);Similar to MADS-box transcription factor. (Os07t0160100-03)
Os07g0252300	3.03766	0.0126079	Hypothetical gene. (Os07t0252300-01)
Os03g0665000	2.9859	0.00416114	GCN5-related N-acetyltransferase (GNAT) domain domain containing protein. (Os03t0665000-00)
Os10g0537800	2.97736	0.007542	Peptidase aspartic, catalytic domain containing protein. (Os10t0537800-01)
Os04g0468000	2.97448	0.0136357	Similar to OSIGBa0128P10.7 protein. (Os04t0468000-01)
Os11g0427401	2.97046	0.0208214	Conserved hypothetical protein. (Os11t0427401-01)
Os02g0288400	2.95733	0.00152321	Similar to MRP-like ABC transporter. (Os02t0288400-00)
Os05g0204900	2.95675	0.029266	Similar to Type 5 protein serine/threonine phosphatase 62 kDa isoform. (Os05t0204900-01);Similar to serine/threonine-protein phosphatase 5. (Os05t0204900-02)
Os02g0255000	2.94283	0.0441221	Similar to Cyclic nucleotide-gated ion channel 1. (Os02t0255000-01);Similar to cyclic nucleotide-gated ion channel 1. (Os02t0255000-02);Similar to Cyclic nucleotide-gated ion channel 1. (Os02t0255000-03)
Os05g0283000	2.92443	0.0420858	Conserved hypothetical protein. (Os05t0283000-01)
Os10g0538200	2.92174	0.0343733	Peptidase aspartic, catalytic domain containing protein. (Os10t0538200-01)
Os01g0764950	2.91696	0.0186888	Pentatricopeptide repeat domain containing protein. (Os01t0764950-01)
Os06g0240050	2.90654	0.0202681	BURP domain-containing protein 9. (Os06t0240050-00)
Os12g0461050	2.90024	0.0244218	Similar to Phenylalanine ammonia-lyase. (Os12t0461050-00)
Os10g0436900	2.89712	0.0148901	Sodium/calcium exchanger membrane region domain containing protein. (Os10t0436900-01)
Os07g0538700	2.89015	0.00482136	Hypothetical conserved gene. (Os07t0538700-01)
Os04g0177500	2.88842	0.046009	Conserved hypothetical protein. (Os04t0177500-00)
Os02g0664400	2.8731	0.0062299	Hypothetical conserved gene. (Os02t0664400-01)
Os01g0221000	2.87211	0.00783416	Hypothetical protein. (Os01t0221000-00)
Os06g0662550	2.85591	0.0293232	Conserved hypothetical protein. (Os06t0662550-01)
Os06g0620000	2.83421	0.0168795	Conserved hypothetical protein. (Os06t0620000-01)
Os01g0523401	2.83315	0.0192024	Similar to ribosomal protein S18. (Os01t0523401-00)
Os11g0245400	2.83197	0.0480253	Protein of unknown function DUF1685 domain containing protein. (Os11t0245400-01)
Os06g0565150	2.8258	0.0215171	Hypothetical protein. (Os06t0565150-00)
Os02g0152200	2.82264	0.0386087	Protein of unknown function DUF1677, Oryza sativa family protein. (Os02t0152200-01);Protein of unknown function DUF1677, Oryza sativa family protein. (Os02t0152200-02)
Os01g0932550	2.81307	0.022691	Similar to Mitochondrial import inner membrane translocase subunit Tim13. (Os01t0932550-00)
Os03g0179700	2.80526	0.0367135	Similar to OSIGBa0140O07.11 protein. (Os03t0179700-00)
Os01g0215750	2.79293	0.00906778	Hypothetical gene. (Os01t0215750-01)
Os01g0351800	2.79229	0.00442528	2OG-Fe(II) oxygenase domain containing protein. (Os01t0351800-01)
Os02g0479300	2.7919	0.00237986	Similar to RS21-C6 protein. (Os02t0479300-01)
Os09g0569780	2.78252	0.0469149	Conserved hypothetical protein. (Os09t0569780-01)
Os12g0165600	2.77515	0.0198792	Exo70 exocyst complex subunit family protein. (Os12t0165600-01)
Os08g0530100	2.77343	0.0342424	Nucleotide-diphospho-sugar transferase domain containing protein. (Os08t0530100-01)
Os11g0156750	2.76735	0.00634351	Hypothetical protein. (Os11t0156750-00)
Os11g0649500	2.76139	0.0313595	Uncharacterised protein family UPF0497, trans-membrane plant domain containing protein. (Os11t0649500-00)
Os12g0183200	2.75321	0.00586605	Similar to 3'(2'),5'-bisphosphate nucleotidase. (Os12t0183200-00)
Os04g0391000	2.75138	0.0147297	Similar to OSIGBa0132D06.6 protein. (Os04t0391000-00)
Os03g0366900	2.74146	0.000383349	Nucleic acid-binding, OB-fold domain containing protein. (Os03t0366900-01)
Os11g0562100	2.73975	9.02e-07	Squalene cyclase domain containing protein. (Os11t0562100-01);Similar to cycloartenol synthase. (Os11t0562100-02)
Os05g0464400	2.73909	0.031197	Hypothetical conserved gene. (Os05t0464400-00)
Os10g0438300	2.73784	0.0151865	Conserved hypothetical protein. (Os10t0438300-00)
Os01g0964333	2.73175	0.00453145	Hypothetical protein. (Os01t0964333-00)
Os05g0552500	2.72892	0.0442582	Similar to Sulfhydryl oxidase 1. (Os05t0552500-01);Similar to thiol oxidoreductase. (Os05t0552500-02)
Os09g0266100	2.72689	0.0469866	Conserved hypothetical protein. (Os09t0266100-01);Hypothetical conserved gene. (Os09t0266100-02)
Os10g0580600	2.72625	0.0218239	Protein of unknown function DUF1997 domain containing protein. (Os10t0580600-00)
Os01g0566800	2.71797	0.00555595	Hypothetical conserved gene. (Os01t0566800-00)
Os11g0557000	2.71724	0.00020533	Phytosulfokine family protein. (Os11t0557000-01)
Os11g0173500	2.71532	0.0402815	Leucine-rich repeat, typical subtype domain containing protein. (Os11t0173500-01);Hypothetical conserved gene. (Os11t0173500-02);Leucine-rich repeat, typical subtype domain containing protein. (Os11t0173500-03)
Os07g0631200	2.69666	0.0290334	Zinc finger, RING/FYVE/PHD-type domain containing protein. (Os07t0631200-01)
Os04g0525100	2.69194	0.000499184	UDP-glucuronosyl/UDP-glucosyltransferase family protein. (Os04t0525100-01)
Os01g0727820	2.68296	0.0167854	Hypothetical protein. (Os01t0727820-00)
Os09g0357400	2.68263	0.0007153	Disease resistance protein domain containing protein. (Os09t0357400-00)
Os07g0262800	2.68259	0.0204289	Similar to Resistance protein candidate (Fragment). (Os07t0262800-01)
Os08g0527700	2.657	0.0167358	Similar to POT family protein. (Os08t0527700-00)
Os06g0328966	2.65306	0.0331818	Hypothetical protein. (Os06t0328966-00)
Os05g0440466	2.64887	0.0221231	Hypothetical protein. (Os05t0440466-00)
Os10g0170501	2.6388	0.00169244	Conserved hypothetical protein. (Os10t0170501-00)
Os11g0621300	2.63263	0.000189124	Protein of unknown function DUF1399 family protein. (Os11t0621300-00)
Os10g0104500	2.62409	0.0322028	Similar to Notchless-related. (Os10t0104500-01);Hypothetical conserved gene. (Os10t0104500-02)
Os03g0834300	2.62321	0.0178213	Similar to GRAS family transcription factor containing protein, expressed. (Os03t0834300-00)
Os09g0463800	2.60088	5.95e-07	Conserved hypothetical protein. (Os09t0463800-01)
Os05g0103800	2.59429	0.0127771	Conserved hypothetical protein. (Os05t0103800-00)
Os02g0830200	2.59204	0.00252499	A-type response regulator, Cytokinin signaling (Os02t0830200-01)
Os08g0203350	2.588	0.0120506	Conserved hypothetical protein. (Os08t0203350-01)
Os07g0163900	2.55078	0.0236464	Pentatricopeptide repeat domain containing protein. (Os07t0163900-00)
Os06g0125000	2.54908	0.0164512	Similar to NBS-LRR disease resistance protein homologue. (Os06t0125000-00)
Os04g0625350	2.54756	0.0464039	Similar to OSIGBa0148A10.3 protein. (Os04t0625350-01)
Os04g0478000	2.52297	0.0271985	Protein of unknown function DUF3778 domain containing protein. (Os04t0478000-01);Protein of unknown function DUF3778 domain containing protein. (Os04t0478000-02)
Os07g0124750	2.522	0.0280569	Similar to cDNA clone:J033097L05, full insert sequence. (Os07t0124750-00)
Os07g0187900	2.5206	0.0110437	Similar to nitrate and chloride transporter. (Os07t0187900-01)
Os03g0670200	2.51978	0.0115692	Similar to YJR013Wp (Fragment). (Os03t0670200-01);Similar to PNT1. (Os03t0670200-02)
Os11g0225000	2.51077	0.0243735	Serine/threonine protein kinase-related domain containing protein. (Os11t0225000-01)
Os03g0654900	2.50703	0.0305953	Conserved hypothetical protein. (Os03t0654900-01)
Os05g0389800	2.50674	0.0172517	Similar to ATP-dependent helicase DHX8 (RNA helicase HRH1) (DEAH-box protein 8). (Os05t0389800-01)
Os06g0567200	2.50174	0.0050946	Cupredoxin domain containing protein. (Os06t0567200-01)
Os03g0861200	2.50146	0.0114432	Hypothetical protein. (Os03t0861200-01)
Os06g0531000	2.47382	0.0322261	Similar to predicted protein. (Os06t0531000-00)
Os02g0191800	2.44886	0.00628377	Conserved hypothetical protein. (Os02t0191800-01)
Os01g0727800	2.43543	0.000266178	Peptidase S8, subtilisin-related domain containing protein. (Os01t0727800-01)
Os10g0522800	2.42503	0.00414127	Conserved hypothetical protein. (Os10t0522800-01)
Os11g0532200	2.42013	1.1e-05	Hypothetical protein. (Os11t0532200-01)
Os06g0225000	2.41506	0.0152458	Similar to NTGB3 (Fragment). (Os06t0225000-00)
Os01g0135600	2.4088	0.0111958	Conserved hypothetical protein. (Os01t0135600-01)
Os11g0555300	2.38147	0.01593	Similar to Rp1-like protein. (Os11t0555300-00)
Os04g0456100	2.38079	0.0276823	Conserved hypothetical protein. (Os04t0456100-01)
Os03g0856100	2.38019	0.0341124	Pentatricopeptide repeat domain containing protein. (Os03t0856100-01)
Os12g0185900	2.37976	8.54e-05	Similar to Zinc knuckle family protein. (Os12t0185900-01)
Os08g0169100	2.36564	0.0227454	Hypothetical gene. (Os08t0169100-01)
Os03g0176500	2.36219	0.0268537	Hypothetical protein. (Os03t0176500-01)
Os02g0535901	2.35178	0.0146973	Cyclin-like F-box domain containing protein. (Os02t0535901-00)
Os07g0196300	2.35028	0.0226	Cyclin-like F-box domain containing protein. (Os07t0196300-01)
Os01g0354200	2.33124	0.0114079	Similar to Sterol C-14 reductase. (Os01t0354200-01)
Os02g0173300	2.32543	0.0302058	Conserved hypothetical protein. (Os02t0173300-01)
Os05g0206200	2.31972	0.000766321	Similar to Myb-like DNA-binding domain containing protein. (Os05t0206200-01)
Os03g0573001	2.31457	0.00539706	Conserved hypothetical protein. (Os03t0573001-00)
Os05g0380250	2.28675	0.00266404	Hypothetical genes. (Os05t0380250-00)
Os07g0186500	2.27445	0.0294895	NB-ARC domain containing protein. (Os07t0186500-01)
Os05g0440632	2.26308	0.00220324	Similar to Histone deacetylase superfamily. (Os05t0440632-00)
Os02g0500250	2.2611	0.0489831	Conserved hypothetical protein. (Os02t0500250-01)
Os03g0855600	2.24591	0.00406004	Similar to DANA2. (Os03t0855600-01);Similar to DANA2. (Os03t0855600-02)
Os05g0121700	2.24096	0.0388814	DNA repair and recombination, RecA-like domain containing protein. (Os05t0121700-01);DNA repair and recombination, RecA-like domain containing protein. (Os05t0121700-02)
Os02g0163300	2.23467	0.0150753	Conserved hypothetical protein. (Os02t0163300-01)
Os03g0310000	2.23185	0.037907	Lipase, GDSL domain containing protein. (Os03t0310000-01)
Os01g0699400	2.23034	0.0193101	Serine/threonine protein kinase domain containing protein. (Os01t0699400-01)
Os11g0614500	2.22658	0.0417188	Similar to Patatin-like protein. (Os11t0614500-01);Similar to Patatin-like protein. (Os11t0614500-02)
Os06g0262501	2.20801	0.0221162	Hypothetical gene. (Os06t0262501-01)
Os03g0138700	2.20418	0.00179166	TGF-beta receptor, type I/II extracellular region family protein. (Os03t0138700-01)
Os01g0651200	2.19393	0.0217267	Hypothetical conserved gene. (Os01t0651200-01)
Os07g0133500	2.18628	0.00896192	Protein of unknown function DUF1005 family protein. (Os07t0133500-01)
Os11g0250000	2.18298	3.51e-06	Similar to RNA recognition motif family protein, expressed. (Os11t0250000-01);Heterogeneous nuclear ribonucleoprotein (hnRNP) R-type protein, Flowering time regulation (Os11t0250000-02)
Os11g0235700	2.17994	8.53e-06	Similar to FHY1. (Os11t0235700-00)
Os01g0113700	2.17202	0.00165472	Similar to Receptor-like kinase. (Os01t0113700-00)
Os01g0223800	2.15255	0.0199543	Hypothetical conserved gene. (Os01t0223800-00)
Os01g0760000	2.14169	0.0193496	Similar to Dynein light chain. (Os01t0760000-01)
Os09g0343200	2.1403	0.000222156	Ankyrin repeat containing protein. (Os09t0343200-01)
Os05g0121100	2.13174	0.0170772	Conserved hypothetical protein. (Os05t0121100-01)
Os05g0583200	2.08212	0.0372569	Zinc finger, BED-type predicted domain containing protein. (Os05t0583200-01)
Os09g0506800	2.07444	0.0327129	Similar to Meiotic asynaptic mutant 1. (Os09t0506800-01);Similar to Essential protein for meiotic synapsis. (Os09t0506800-02)
Os11g0258900	2.0713	0.0366995	Conserved hypothetical protein. (Os11t0258900-01)
Os03g0113500	2.06802	0.00789344	Conserved hypothetical protein. (Os03t0113500-01)
Os02g0791800	2.06765	0.00476954	WD-40 repeat containing protein. (Os02t0791800-01);WD-40 repeat containing protein. (Os02t0791800-02)
Os03g0791200	2.06626	0.0134568	Similar to Aldehyde oxidase 1 (Fragment). (Os03t0791200-00)
Os07g0298700	2.05896	0.0368892	Similar to OSIGBa0124C14.5 protein. (Os07t0298700-01)
Os01g0537250	2.05094	0.00242773	Protein of unknown function DUF3778 domain containing protein. (Os01t0537250-01)
Os05g0592000	2.04592	0.0360251	Hypothetical conserved gene. (Os05t0592000-00)
Os10g0462600	2.02613	0.00013085	Conserved hypothetical protein. (Os10t0462600-01);Conserved hypothetical protein. (Os10t0462600-02)
Os09g0432231	2.02309	0.0283386	Similar to Cold-regulated protein. (Os09t0432231-00)
Os05g0501350	2.02191	0.0137278	Similar to Cyclin-B1-5. (Os05t0501350-00)
Os03g0611700	2.02173	0.000459236	Primosome PriB/single-strand DNA-binding domain containing protein. (Os03t0611700-01);Conserved hypothetical protein. (Os03t0611700-02)
Os05g0269500	2.02089	0.00281229	Generative cell specific-1, HAP2-GCS1 domain containing protein. (Os05t0269500-01)
Os07g0191900	2.01961	0.0377963	Conserved hypothetical protein. (Os07t0191900-01)
Os09g0510000	2.00599	0.000205994	Hypothetical protein. (Os09t0510000-01)
Os04g0635000	2.00247	0.0363768	Similar to H0315F07.10 protein. (Os04t0635000-01)
Os05g0548600	2.00001	0.00139507	Pentatricopeptide repeat domain containing protein. (Os05t0548600-00)
Os03g0251700	1.99296	0.0182606	Similar to Protein kinase domain containing protein, expressed. (Os03t0251700-00)
Os01g0266400	1.98487	0.00557643	Conserved hypothetical protein. (Os01t0266400-01)
Os08g0528500	1.97586	0.0448798	Uncharacterised protein family UPF0016 domain containing protein. (Os08t0528500-01)
Os03g0643522	1.97568	0.00638366	Conserved hypothetical protein. (Os03t0643522-00)
Os11g0639400	1.97326	0.00248564	Hypothetical conserved gene. (Os11t0639400-01)
Os07g0628301	1.97232	0.0478649	Hypothetical gene. (Os07t0628301-00)
Os03g0407050	1.96556	0.000200448	Hypothetical protein. (Os03t0407050-00)
Os08g0235400	1.95527	0.0196512	Conserved hypothetical protein. (Os08t0235400-01)
Os04g0577375	1.95087	0.00792871	Hypothetical conserved gene. (Os04t0577375-00)
Os09g0272600	1.95047	0.0314209	Conserved hypothetical protein. (Os09t0272600-01)
Os12g0588900	1.94778	0.00357603	Rossmann-like alpha/beta/alpha sandwich fold domain containing protein. (Os12t0588900-01);Similar to Cytoplasmic tRNA 2-thiolation protein 2. (Os12t0588900-02)
Os01g0524500	1.94621	0.0485852	Conserved hypothetical protein. (Os01t0524500-01);Transcription factor, Regulation of nutrient mobilization in germination (Os01t0524500-02)
Os05g0429400	1.94087	7.71e-05	Phosphatidylinositol transfer protein-like, N-terminal domain containing protein. (Os05t0429400-01)
Os04g0587500	1.94013	0.00119587	Domain of unknown function DUF250 domain containing protein. (Os04t0587500-01)
Os12g0171500	1.91973	0.00661476	Conserved hypothetical protein. (Os12t0171500-01)
Os01g0660200	1.91491	0.00353294	Acidic class III chitinase OsChib3a precursor (Chitinase) (EC 3.2.1.14). (Os01t0660200-01)
Os02g0749200	1.9113	0.0349062	Hypothetical protein. (Os02t0749200-01)
Os02g0828500	1.90924	0.022981	Tetratricopeptide-like helical domain containing protein. (Os02t0828500-01)
Os06g0649900	1.90739	0.0158011	Phospholipase D/Transphosphatidylase domain containing protein. (Os06t0649900-01)
Os03g0336200	1.90567	0.00296469	bZIP DNA-binding protein, Disease resistance, Vascular development (Os03t0336200-01);Transcription factor RF2b. (Os03t0336200-02)
Os04g0491200	1.90178	0.0140961	Oligopeptide transporter domain containing protein. (Os04t0491200-00)
Os04g0413900	1.90043	0.00100764	Protein of unknown function DUF584 family protein. (Os04t0413900-01)
Os04g0652600	1.8925	0.0320443	Similar to OSIGBa0113E10.15 protein. (Os04t0652600-01)
Os04g0617200	1.88496	0.0256097	Conserved hypothetical protein. (Os04t0617200-01)
Os01g0302900	1.88445	0.0480221	Conserved hypothetical protein. (Os01t0302900-01)
Os11g0521000	1.87961	0.0427335	Lipase, GDSL domain containing protein. (Os11t0521000-01)
Os06g0306300	1.87691	0.0010466	Haem peroxidase domain containing protein. (Os06t0306300-01)
Os02g0734800	1.85951	0.0275502	Protein of unknown function DUF26 domain containing protein. (Os02t0734800-01)
Os03g0247200	1.85766	0.0056516	Conserved hypothetical protein. (Os03t0247200-01)
Os12g0194600	1.85584	0.0126079	Similar to DNA binding protein. (Os12t0194600-01);Similar to DNA binding protein. (Os12t0194600-02)
Os12g0614600	1.84332	0.0141205	Serine/threonine protein kinase domain containing protein. (Os12t0614600-01)
Os03g0435300	1.84174	0.00138784	Similar to exodeoxyribonuclease V. (Os03t0435300-00)
Os03g0201600	1.83267	0.0272593	Similar to ischemia/reperfusion inducible protein. (Os03t0201600-01);Similar to ischemia/reperfusion inducible protein. (Os03t0201600-02)
Os07g0442800	1.83052	0.000172055	Conserved hypothetical protein. (Os07t0442800-01)
Os03g0667500	1.82932	0.025359	Similar to Metal transport protein. (Os03t0667500-01)
Os08g0538800	1.82287	0.046784	Pentatricopeptide repeat domain containing protein. (Os08t0538800-01)
Os05g0430200	1.80788	0.00862859	Similar to ATP binding protein. (Os05t0430200-01);Similar to ATP binding protein. (Os05t0430200-02)
Os01g0727840	1.80384	0.0181652	Similar to subtilase family protein. (Os01t0727840-00)
Os11g0598200	1.79891	1.12e-05	Hypothetical protein. (Os11t0598200-01)
Os01g0637100	1.77497	0.0210472	Similar to predicted protein. (Os01t0637100-00)
Os05g0497500	1.77253	0.0384837	Hypothetical conserved gene. (Os05t0497500-00)
Os07g0148800	1.7718	0.00907786	Conserved hypothetical protein. (Os07t0148800-01)
Os09g0417500	1.76729	0.0153475	Pentatricopeptide repeat domain containing protein. (Os09t0417500-01)
Os10g0132800	1.76256	0.00682536	Hypothetical protein. (Os10t0132800-01)
Os04g0474800	1.75758	0.00237672	Similar to OSIGBa0135C13.7 protein. (Os04t0474800-01);Similar to Isoform 2 of Beta-glucosidase 12. (Os04t0474800-02);Similar to OSIGBa0135C13.7 protein. (Os04t0474800-03)
Os03g0755625	1.75676	0.011316	Hypothetical conserved gene. (Os03t0755625-00)
Os07g0601000	1.75416	0.000116281	Similar to NADPH HC toxin reductase (Fragment). (Os07t0601000-01)
Os07g0669700	1.75266	0.00314309	Potassium transporter 4 (AtPOT4) (AtKUP3) (AtKT4). (Os07t0669700-01)
Os12g0516300	1.75249	0.00359934	NB-ARC domain containing protein. (Os12t0516300-01);Similar to NB-ARC domain containing protein. (Os12t0516300-02);Hypothetical conserved gene. (Os12t0516300-03)
Os01g0585400	1.75233	0.0317153	Similar to DDB1A (DAMAGED DNA BINDING PROTEIN 1A); DNA binding / protein binding. (Os01t0585400-01)
Os09g0480300	1.74623	0.032785	Similar to cDNA clone:J033054O21, full insert sequence. (Os09t0480300-01);Zinc finger, CCHC-type domain containing protein. (Os09t0480300-02)
Os11g0648400	1.74526	0.021345	Protein of unknown function DUF3615 domain containing protein. (Os11t0648400-01)
Os11g0481301	1.74066	0.0484474	Hypothetical gene. (Os11t0481301-01)
Os01g0902000	1.73868	0.00045238	Hypothetical protein. (Os01t0902000-01)
Os11g0682600	1.73513	0.00106094	Conserved hypothetical protein. (Os11t0682600-01)
Os07g0516900	1.73462	1.03e-05	Similar to RNA Binding Protein 45. (Os07t0516900-01);Similar to RNA Binding Protein 45. (Os07t0516900-02);Nucleotide-binding, alpha-beta plait domain containing protein. (Os07t0516900-03)
Os01g0290800	1.72886	0.046144	Hypothetical protein. (Os01t0290800-01)
Os06g0714600	1.72176	0.0101937	Small G protein, Negative regulation of brassinosteroid signaling (Os06t0714600-01)
Os08g0557500	1.70746	0.00105715	Similar to peptidyl-prolyl cis-trans isomerase cyclophilin-type family protein. (Os08t0557500-01);Similar to predicted protein. (Os08t0557500-02)
Os06g0585982	1.70309	0.00877916	Protein kinase, catalytic domain domain containing protein. (Os06t0585982-00)
Os09g0260900	1.70252	0.00836887	Hypothetical gene. (Os09t0260900-01)
Os08g0145501	1.70014	0.0459133	Conserved hypothetical protein. (Os08t0145501-01)
Os11g0636600	1.69901	0.00357688	Conserved hypothetical protein. (Os11t0636600-01);Conserved hypothetical protein. (Os11t0636600-02)
Os04g0205200	1.69769	0.0087936	NB-ARC domain containing protein. (Os04t0205200-00)
Os08g0298800	1.69711	0.0166056	Similar to cDNA clone:001-036-H04, full insert sequence. (Os08t0298800-01)
Os10g0140200	1.69589	5.08e-05	Glycoside hydrolase, family 38 domain containing protein. (Os10t0140200-01)
Os02g0289500	1.69489	0.0431466	Similar to anthocyanin 5-aromatic acyltransferase. (Os02t0289500-01)
Os07g0558500	1.69411	0.000710287	Inositol phosphatase-like protein. (Os07t0558500-01);Similar to Protein THYLAKOID FORMATION1, chloroplastic. (Os07t0558500-02)
Os03g0212800	1.69289	0.03761	Similar to Beta-glucosidase. (Os03t0212800-01)
Os06g0328900	1.6892	0.0299334	Cytochrome P450 family protein. (Os06t0328900-01)
Os07g0242400	1.68787	0.00235164	F-box domain, cyclin-like domain containing protein. (Os07t0242400-01)
Os07g0686300	1.68013	0.0251331	Zinc finger, RING/FYVE/PHD-type domain containing protein. (Os07t0686300-01)
Os09g0473350	1.67715	0.0466834	Similar to methylcytosine binding domain protein. (Os09t0473350-00)
Os03g0175800	1.67641	0.0188442	Positive regulator of auxin response and transport, Regulation of grain size (Os03t0175800-01)
Os11g0265650	1.6756	0.00644908	Hypothetical protein. (Os11t0265650-00)
Os10g0111700	1.66895	0.00943613	Similar to POT family protein, expressed. (Os10t0111700-01);Similar to POT family protein, expressed. (Os10t0111700-02)
Os07g0201500	1.66449	0.0365604	UDP-glucuronosyl/UDP-glucosyltransferase domain containing protein. (Os07t0201500-00)
Os09g0342000	1.66263	0.0438218	Cyclin-like F-box domain containing protein. (Os09t0342000-01)
Os01g0915350	1.6584	0.000613096	Hypothetical protein. (Os01t0915350-00)
Os01g0136300	1.65584	0.0112731	Conserved hypothetical protein. (Os01t0136300-01)
Os01g0694400	1.65455	0.00355877	Conserved hypothetical protein. (Os01t0694400-00)
Os11g0109500	1.65207	0.0331967	Staphylococcal nuclease (SNase-like), OB-fold domain containing protein. (Os11t0109500-01)
CAA33968	1.64644	0.0315531	-
Os06g0295700	1.64643	0.000358413	Conserved hypothetical protein. (Os06t0295700-01)
Os10g0486100	1.64462	0.0389606	Cytochrome P450-like protein (CYP86B1). (Os10t0486100-00)
Os07g0222800	1.64204	0.0161625	Acyl carrier protein-like protein. (Os07t0222800-01);Acyl carrier protein-like protein. (Os07t0222800-02)
Os01g0687400	1.64019	0.0178357	Similar to Chitinase (EC 3.2.1.14). (Os01t0687400-01)
Os07g0297200	1.63572	0.00882064	Hypothetical protein. (Os07t0297200-01)
Os08g0518600	1.63054	0.0303929	Conserved hypothetical protein. (Os08t0518600-01)
Os12g0634600	1.6226	0.000117308	Conserved hypothetical protein. (Os12t0634600-01)
Os01g0786800	1.61301	5.87e-05	Protein of unknown function DUF81 domain containing protein. (Os01t0786800-01)
Os11g0578033	1.61286	0.0160602	Conserved hypothetical protein. (Os11t0578033-01)
Os06g0344201	1.61052	0.036855	Conserved hypothetical protein. (Os06t0344201-00)
Os12g0565200	1.60864	0.0328028	Conserved hypothetical protein. (Os12t0565200-00)
Os01g0170900	1.6081	0.0150273	Conserved hypothetical protein. (Os01t0170900-01)
Os06g0191200	1.6078	0.000168224	Similar to zinc ion binding. (Os06t0191200-01)
CAA33910	1.60611	0.0061357	NADH dehydrogenase ND1
Os11g0131300	1.60554	0.0323077	Hypothetical conserved gene. (Os11t0131300-00)
Os06g0470350	1.60404	0.0260095	Hypothetical gene. (Os06t0470350-01)
Os11g0594200	1.6004	0.000138871	Similar to Notchless gene homolog. (Os11t0594200-01)
Os11g0225200	1.59977	0.0296165	Hypothetical protein. (Os11t0225200-00)
Os01g0265400	1.59959	0.0291828	Conserved hypothetical protein. (Os01t0265400-01);Conserved hypothetical protein. (Os01t0265400-02)
Os02g0461100	1.59496	0.000133955	Conserved hypothetical protein. (Os02t0461100-01)
Os04g0277400	1.59033	0.0474195	Membrane bound O-acyl transferase, MBOAT family protein. (Os04t0277400-01)
Os09g0322800	1.58574	0.0462998	Disease resistance protein domain containing protein. (Os09t0322800-00)
Os04g0364800	1.58536	0.00528853	Barwin-related endoglucanase domain containing protein. (Os04t0364800-00)
Os11g0597700	1.57693	0.00299457	Similar to Resistant protein. (Os11t0597700-01)
Os11g0579400	1.57547	0.000353683	Similar to Leucine Rich Repeat family protein, expressed. (Os11t0579400-01);Similar to Leucine Rich Repeat family protein, expressed. (Os11t0579400-02)
Os11g0516400	1.57226	0.00102475	Hypothetical conserved gene. (Os11t0516400-01)
Os08g0198900	1.57138	0.0186191	Conserved hypothetical protein. (Os08t0198900-01)
Os07g0629500	1.56954	0.0331359	Similar to cDNA clone:002-114-B06, full insert sequence. (Os07t0629500-01)
Os07g0481000	1.56453	0.0316762	Similar to Pollen-specific kinase partner protein. (Os07t0481000-01);Similar to MYND finger family protein. (Os07t0481000-02);Hypothetical gene. (Os07t0481000-03)
Os07g0210100	1.56097	0.00146252	Exo70 exocyst complex subunit domain containing protein. (Os07t0210100-01)
Os07g0626200	1.55913	0.0209364	DNA-binding SAP domain containing protein. (Os07t0626200-01);Hypothetical conserved gene. (Os07t0626200-02)
Os06g0230801	1.55851	0.00134114	Hypothetical gene. (Os06t0230801-00)
Os12g0118900	1.55547	0.0178667	Cytochrome P450 family protein. (Os12t0118900-01)
Os01g0276600	1.54329	0.00149761	Zinc finger, RING/FYVE/PHD-type domain containing protein. (Os01t0276600-01)
Os08g0486867	1.54017	0.0158219	Conserved hypothetical protein. (Os08t0486867-01)
Os04g0420700	1.53758	0.0495695	Hypothetical protein. (Os04t0420700-00)
Os12g0254601	1.53455	0.000706096	Hypothetical gene. (Os12t0254601-01)
Os10g0568000	1.53275	0.0191116	Conserved hypothetical protein. (Os10t0568000-01)
Os06g0701100	1.53157	2.97e-05	Eukaryotic initiation factor 4A (eIF4A) (eIF-4A). (Os06t0701100-02);Similar to cDNA clone:001-114-H08, full insert sequence. (Os06t0701100-03)
Os12g0210450	1.52383	0.0436247	Hypothetical gene. (Os12t0210450-00)
Os05g0589400	1.52371	0.0143842	Similar to I-box binding factor (Fragment). (Os05t0589400-01);Similar to I-box binding factor (Fragment). (Os05t0589400-02)
Os08g0461800	1.51985	0.00220065	Hypothetical conserved gene. (Os08t0461800-01);Similar to cDNA clone:J013069F06, full insert sequence. (Os08t0461800-02)
Os04g0563300	1.51781	0.0287227	Similar to H0211B05.14 protein. (Os04t0563300-01);Cyclin-like F-box domain containing protein. (Os04t0563300-02)
Os04g0506100	1.51546	0.000665004	Similar to Receptor-like protein kinase. (Os04t0506100-01)
Os01g0889800	1.50742	0.0125847	Rhodanese-like domain containing protein. (Os01t0889800-01)
Os08g0103300	1.50494	0.00777504	Similar to Tubby-like protein 3. (Os08t0103300-01);Similar to Tubby-like F-box protein 12. (Os08t0103300-02)
Os01g0111400	1.50098	0.0310811	Zinc finger, BED-type predicted domain containing protein. (Os01t0111400-01);Similar to transposon protein. (Os01t0111400-02)
Os07g0621400	1.49881	0.00214852	Similar to cDNA clone:002-132-C09, full insert sequence. (Os07t0621400-01)
Os11g0256100	1.49802	0.0412255	Pentatricopeptide repeat domain containing protein. (Os11t0256100-00)
Os05g0143700	1.49534	0.0393085	Hypothetical conserved gene. (Os05t0143700-00)
CAA33971	1.49137	0.0184876	ribosomal protein L20
Os11g0265600	1.48651	0.0113783	Similar to predicted protein. (Os11t0265600-00)
Os08g0518200	1.48562	0.0319713	Mitochodrial transcription termination factor-related family protein. (Os08t0518200-01)
Os06g0101100	1.4819	0.00126404	Nicotinamide N-methyltransferase, putative domain containing protein. (Os06t0101100-01)
Os11g0256200	1.47758	0.000898628	Protein of unknown function DUF842, eukaryotic family protein. (Os11t0256200-01)
Os05g0573700	1.47533	0.00894805	Similar to Ketol-acid reductoisomerase, chloroplast precursor (EC 1.1.1.86) (Acetohydroxy-acid reductoisomerase) (Alpha-keto-beta-hydroxylacil reductoisomerase). (Os05t0573700-01);Similar to Ketol-acid reductoisomerase. (Os05t0573700-02)
Os02g0494400	1.47076	0.000398156	Similar to TPR Domain containing protein, expressed. (Os02t0494400-01)
Os03g0283900	1.46501	0.0257658	Similar to Serine/threonine-protein kinase PBS1 (EC 2.7.1.37) (AvrPphB susceptible protein 1). (Os03t0283900-01)
Os04g0496700	1.45908	0.0271961	Similar to H0306B06.7 protein. (Os04t0496700-00)
Os04g0502300	1.45818	0.000125149	Similar to 40S ribosomal protein S11. (Os04t0502300-01)
Os02g0215900	1.45734	0.0388322	Protein kinase, catalytic domain domain containing protein. (Os02t0215900-01)
Os07g0252200	1.45665	0.00764485	Hypothetical conserved gene. (Os07t0252200-01)
Os01g0226500	1.4554	0.000191756	Conserved hypothetical protein. (Os01t0226500-01);Similar to predicted protein. (Os01t0226500-02)
Os02g0671200	1.44868	0.000600563	Protein of unknown function DUF295 domain containing protein. (Os02t0671200-01)
Os02g0215600	1.44668	0.00923843	Conserved hypothetical protein. (Os02t0215600-01)
Os08g0205300	1.44663	0.0198792	Hypothetical conserved gene. (Os08t0205300-01);SET domain containing protein. (Os08t0205300-02);Hypothetical conserved gene. (Os08t0205300-03)
Os10g0167300	1.44623	0.0108081	Similar to Enolase 2 (EC 4.2.1.11) (2-phosphoglycerate dehydratase 2) (2-phospho- D-glycerate hydro-lyase 2). (Os10t0167300-01);Similar to Enolase 2 (EC 4.2.1.11) (2-phosphoglycerate dehydratase 2) (2-phospho- D-glycerate hydro-lyase 2). (Os10t0167300-02)
Os06g0717400	1.44308	0.00333552	Pseudouridine synthase domain containing protein. (Os06t0717400-01)
Os02g0646200	1.44265	0.00451852	Zinc finger, B-box domain containing protein. (Os02t0646200-01)
Os03g0607700	1.4416	0.000364944	Zinc finger, C2H2-like domain containing protein. (Os03t0607700-01)
Os12g0267800	1.44135	0.00869885	Similar to multidrug/pheromone exporter, MDR family, ABC transporter family. (Os12t0267800-01)
Os05g0100700	1.43538	0.0242246	Hypothetical conserved gene. (Os05t0100700-01);Similar to Somatic embryogenesis receptor kinase-like protein. (Os05t0100700-02)
Os02g0132300	1.4312	0.0432687	Similar to Erythrocyte membrane protein PFEMP3 (Fragment). (Os02t0132300-01);Similar to Erythrocyte membrane protein PFEMP3 (Fragment). (Os02t0132300-02);Similar to Erythrocyte membrane protein PFEMP3 (Fragment). (Os02t0132300-03)
Os02g0537200	1.43111	0.000179205	Cyclin-like F-box domain containing protein. (Os02t0537200-01)
Os05g0387750	1.43048	0.0240217	Hypothetical gene. (Os05t0387750-01)
Os10g0113900	1.42913	0.000117017	Similar to NAD(P)H-dependent oxidoreductase. (Os10t0113900-01);Similar to NADPH-dependent codeinone reductase (EC 1.1.1.247). (Os10t0113900-02)
Os04g0443801	1.42834	0.000162363	Cytochrome c oxidase biogenesis protein Cmc1-like domain containing protein. (Os04t0443801-01);Similar to 12-oxo-phytodienoic acid reductase5. (Os04t0443801-02);Similar to 12-oxo-phytodienoic acid reductase5. (Os04t0443801-03)
Os05g0311600	1.42675	0.0372151	Similar to Transposase. (Os05t0311600-01);Conserved hypothetical protein. (Os05t0311600-02)
Os05g0227800	1.4237	0.00310734	Homeodomain-like containing protein. (Os05t0227800-01)
Os03g0775500	1.41637	5.81e-05	Protein of unknown function DUF59 domain containing protein. (Os03t0775500-01)
Os05g0552300	1.41636	0.000151028	Similar to Guanine nucleotide-binding protein beta subunit-like protein (GPB-LR) (RWD). (Os05t0552300-02)
Os02g0169400	1.41621	0.038857	Similar to Argonaute 4 protein. (Os02t0169400-01)
Os04g0496000	1.41496	0.010725	Glucose/ribitol dehydrogenase family protein. (Os04t0496000-01)
Os09g0391800	1.41471	0.0079745	Hypothetical gene. (Os09t0391800-00)
Os08g0542100	1.41426	4.81e-05	Similar to 60S ribosomal protein L7. (Os08t0542100-01)
Os06g0556300	1.41422	0.0028646	Cyclin-like F-box domain containing protein. (Os06t0556300-01)
Os04g0621900	1.41317	0.0204164	Conserved hypothetical protein. (Os04t0621900-01)
Os07g0597400	1.41163	2.86e-06	Conserved hypothetical protein. (Os07t0597400-01)
Os08g0430800	1.4077	0.000710741	Conserved hypothetical protein. (Os08t0430800-01);Conserved hypothetical protein. (Os08t0430800-02)
Os03g0781000	1.40411	0.0158118	Conserved hypothetical protein. (Os03t0781000-01)
Os11g0558500	1.399	0.00200826	Ribosome-inactivating protein domain containing protein. (Os11t0558500-01);Hypothetical protein. (Os11t0558500-02)
Os02g0128300	1.39647	9.58e-05	ENTH/VHS domain containing protein. (Os02t0128300-01)
Os01g0151900	1.39075	0.0283264	Pentatricopeptide repeat domain containing protein. (Os01t0151900-01)
Os04g0399000	1.38938	4.85e-05	Similar to Ribosomal protein S27. (Os04t0399000-00)
Os11g0102700	1.38859	0.000482477	Peptidase C48, SUMO/Sentrin/Ubl1 family protein. (Os11t0102700-01)
Os07g0164200	1.38706	0.00217513	Similar to cDNA clone:001-026-G04, full insert sequence. (Os07t0164200-02)
Os06g0594400	1.38539	0.000224566	Kelch-type beta propeller domain containing protein. (Os06t0594400-02)
Os02g0510200	1.3793	0.00079364	Acetolactate synthase (EC4.6.3.8), Acetohydroxy acid synthase, Herbicide resistance (mutated form of rice ALS, OsmALS (W548L/S627I)) (Os02t0510200-01)
Os04g0585000	1.376	0.0392695	Similar to RING-H2 finger protein ATL1R. (Os04t0585000-01)
Os08g0227100	1.37487	0.000570265	Kelch related domain containing protein. (Os08t0227100-01)
Os02g0132600	1.36572	0.000152592	Conserved hypothetical protein. (Os02t0132600-01);Hypothetical conserved gene. (Os02t0132600-02)
Os06g0271500	1.36365	0.00246164	Transposon, En/Spm-like domain containing protein. (Os06t0271500-01);Similar to OSIGBa0132O24.3 protein. (Os06t0271500-02)
Os09g0121000	1.36156	0.0389606	Similar to SMC6 protein. (Os09t0121000-01)
Os10g0397400	1.36029	0.00257786	Dim/dwf1 protein, Cell elongation protein DIMINUTO/Dwarf1, Brassinosteroid (BR) biosynthesis (Os10t0397400-01)
Os11g0195700	1.35643	0.000706096	Conserved hypothetical protein. (Os11t0195700-01)
Os09g0265800	1.35461	0.0332443	HGWP repeat domain containing protein. (Os09t0265800-01)
Os07g0598100	1.34613	0.000215522	Similar to Hydroxyproline-rich glycoprotein DZ-HRGP precursor. (Os07t0598100-01)
Os02g0682700	1.34597	0.0383694	Similar to protein binding protein. (Os02t0682700-00)
Os03g0251000	1.34529	0.0189861	Plant lipid transfer protein/seed storage/trypsin-alpha amylase inhibitor domain containing protein. (Os03t0251000-03)
Os12g0510000	1.34493	0.0286062	Conserved hypothetical protein. (Os12t0510000-01);Conserved hypothetical protein. (Os12t0510000-02)
Os06g0202400	1.34448	0.01364	Conserved hypothetical protein. (Os06t0202400-01)
Os04g0449000	1.34381	0.00245474	Similar to H0818E04.8 protein. (Os04t0449000-01);Similar to H0818E04.8 protein. (Os04t0449000-02)
Os08g0106100	1.34319	0.0049145	Conserved hypothetical protein. (Os08t0106100-01)
Os04g0663300	1.34272	2.25e-05	Similar to PHD finger-like domain protein 5A (Splicing factor 3B associated 14 kDa protein) (SF3b14b). (Os04t0663300-01)
Os08g0287800	1.33976	0.000548553	Hypothetical conserved gene. (Os08t0287800-00)
Os04g0340800	1.33849	0.00660608	Conserved hypothetical protein. (Os04t0340800-01);Conserved hypothetical protein. (Os04t0340800-02)
Os07g0669675	1.33832	0.0321489	Hypothetical protein. (Os07t0669675-00)
Os03g0575500	1.33704	2.42e-05	Conserved hypothetical protein. (Os03t0575500-01);Conserved hypothetical protein. (Os03t0575500-02)
Os02g0714700	1.33692	0.0462442	Hypothetical protein. (Os02t0714700-01)
Os10g0183000	1.33606	0.00207356	NB-LRR protein, Immune response (Os10t0183000-01);NB-ARC domain containing protein. (Os10t0183000-02)
Os05g0567400	1.33459	0.000175587	Ribosomal RNA methyltransferase J domain containing protein. (Os05t0567400-01)
Os08g0517300	1.33409	0.0161109	Zinc finger, C2H2-like domain containing protein. (Os08t0517300-01);Hypothetical conserved gene. (Os08t0517300-02)
Os11g0240800	1.33327	0.00998738	Hypothetical conserved gene. (Os11t0240800-01);Hypothetical conserved gene. (Os11t0240800-02)
Os04g0518600	1.33198	0.0179181	Similar to OSIGBa0102I15.5 protein. (Os04t0518600-01)
Os04g0597501	1.33045	0.0287966	Similar to OSJNba0093F12.10 protein. (Os04t0597501-00)
Os02g0224800	1.32959	0.00515883	Ndr family protein. (Os02t0224800-01);Similar to predicted protein. (Os02t0224800-02)
Os11g0585700	1.32876	6.33e-05	Similar to 50S ribosomal protein L4. (Os11t0585700-01)
Os04g0508800	1.32844	0.00155609	Similar to Retroelement pol polyprotein-like. (Os04t0508800-01)
Os06g0188800	1.32836	0.000545904	Extracellular solute-binding protein, family 3 domain containing protein. (Os06t0188800-01);Extracellular solute-binding protein, family 3 domain containing protein. (Os06t0188800-02)
Os06g0329350	1.32387	0.0021568	Conserved hypothetical protein. (Os06t0329350-01)
Os05g0521400	1.32041	0.000253006	Conserved hypothetical protein. (Os05t0521400-01)
Os08g0500200	1.31986	0.000255076	CBF1-interacting co-repressor CIR, N-terminal domain containing protein. (Os08t0500200-01);Similar to predicted protein. (Os08t0500200-02)
Os07g0535100	1.31983	0.000322807	Cyclin-like F-box domain containing protein. (Os07t0535100-01)
Os11g0445300	1.3197	0.00115302	Protein kinase, core domain containing protein. (Os11t0445300-01)
Os01g0795300	1.31441	0.019663	Hypothetical protein. (Os01t0795300-01);Non-protein coding transcript. (Os01t0795300-02);Non-protein coding transcript. (Os01t0795300-03)
Os07g0481300	1.31309	0.0108615	Hypothetical conserved gene. (Os07t0481300-01)
Os04g0349500	1.31309	4.03e-05	Similar to 40S ribosomal protein S8. (Os04t0349500-01)
Os09g0480600	1.31096	0.0206276	Conserved hypothetical protein. (Os09t0480600-01)
Os03g0174600	1.31088	0.00263925	Rossmann-like alpha/beta/alpha sandwich fold domain containing protein. (Os03t0174600-01);Similar to tRNA methyltransferase. (Os03t0174600-02)
Os08g0230300	1.30761	0.0110667	Hypothetical conserved gene. (Os08t0230300-00)
Os05g0185700	1.30751	0.000615362	Similar to predicted protein. (Os05t0185700-01);Ribokinase family protein. (Os05t0185700-02)
Os05g0591500	1.30727	0.000238831	Similar to Cysteine synthase. (Os05t0591500-01)
Os06g0338900	1.30648	7.77e-06	Bacterial transferase hexapeptide repeat domain containing protein. (Os06t0338900-01)
Os06g0168600	1.30312	0.0225449	Ribonucleotide reductase, Chloroplast biogenesis (Os06t0168600-01)
Os01g0225200	1.30303	0.000103475	Similar to predicted protein. (Os01t0225200-01)
Os07g0181000	1.2998	0.00237112	Similar to Pyruvate kinase isozyme A, chloroplast precursor (EC 2.7.1.40). (Os07t0181000-01);Similar to Pyruvate kinase. (Os07t0181000-02);Similar to Pyruvate kinase. (Os07t0181000-03);Similar to Pyruvate kinase. (Os07t0181000-04)
Os02g0812400	1.29538	2.01e-05	Trimeric LpxA-like domain containing protein. (Os02t0812400-01)
Os01g0616600	1.29486	0.0168271	Pentatricopeptide repeat domain containing protein. (Os01t0616600-01)
Os01g0113800	1.29363	0.0292371	Protein kinase, core domain containing protein. (Os01t0113800-01)
Os04g0538750	1.29359	0.0112036	Conserved hypothetical protein. (Os04t0538750-01)
Os05g0492500	1.29131	0.000156091	Hypothetical protein. (Os05t0492500-01)
Os04g0665800	1.29054	4.29e-05	Similar to H1005F08.12 protein. (Os04t0665800-01);Similar to H1005F08.12 protein. (Os04t0665800-02);Similar to H1005F08.12 protein. (Os04t0665800-03)
Os07g0647300	1.28977	0.000109627	Conserved hypothetical protein. (Os07t0647300-01)
Os03g0638800	1.28897	4.71e-06	Similar to ATP binding protein. (Os03t0638800-01)
Os05g0349500	1.28895	1.43e-05	Pleckstrin homology-type domain containing protein. (Os05t0349500-01)
Os03g0622300	1.28259	0.00286811	Conserved hypothetical protein. (Os03t0622300-01);Hypothetical gene. (Os03t0622300-02)
Os03g0396900	1.27964	0.00198023	Hypothetical conserved gene. (Os03t0396900-01);Similar to PIMT. (Os03t0396900-02)
Os09g0517900	1.27955	0.0092748	UDP-glucuronosyl/UDP-glucosyltransferase family protein. (Os09t0517900-01)
Os01g0870201	1.27934	0.0162268	Similar to GPI transamidase subunit PIG-U family protein. (Os01t0870201-00)
Os01g0881400	1.27918	0.0109679	DNA repair metallo-beta-lactamase domain containing protein. (Os01t0881400-00)
Os07g0436700	1.27812	0.0057421	Conserved hypothetical protein. (Os07t0436700-01)
Os11g0585100	1.27631	0.000686701	Conserved hypothetical protein. (Os11t0585100-01)
Os08g0214900	1.27544	0.0126079	Hypothetical conserved gene. (Os08t0214900-00)
Os03g0130750	1.27397	0.00122532	Similar to predicted protein. (Os03t0130750-01)
Os12g0507300	1.27287	0.00182659	Similar to WRKY DNA binding domain containing protein, expressed. (Os12t0507300-00)
Os02g0198300	1.27184	0.00129545	ARF GTPase-activating protein GIT2 (G protein-coupled receptor kinase- interactor 2) (GRK-interacting protein 2) (Cool-interacting tyrosine- phosphorylated protein 2) (CAT2) (CAT-2). Splice isoform 2. (Os02t0198300-01);Arf GTPase activating protein family protein. (Os02t0198300-02)
Os11g0557700	1.27165	0.0192433	Similar to S-adenosylmethionine-dependent methyltransferase/ catalytic. (Os11t0557700-01);Similar to S-adenosylmethionine-dependent methyltransferase/ catalytic. (Os11t0557700-02)
Os02g0177900	1.26837	0.000131171	Carbohydrate kinase, FGGY domain containing protein. (Os02t0177900-01);Carbohydrate kinase, FGGY family protein. (Os02t0177900-02)
Os09g0436200	1.2667	0.000817788	Hypothetical protein. (Os09t0436200-01)
Os02g0588700	1.26625	0.00011201	Conserved hypothetical protein. (Os02t0588700-01)
Os07g0435400	1.26528	6.66e-06	Similar to WD40. (Os07t0435400-01);Non-protein coding transcript. (Os07t0435400-02)
Os08g0517900	1.26519	6.91e-05	Similar to 30S ribosomal protein S16. (Os08t0517900-01)
Os03g0572250	1.26513	0.0133981	Conserved hypothetical protein. (Os03t0572250-01)
Os05g0273500	1.26355	0.00489481	Conserved hypothetical protein. (Os05t0273500-01)
Os10g0521300	1.26215	0.00108429	Inner membrane protein OXA1-like, mitochondrial precursor. (Os10t0521300-01)
Os03g0219200	1.26041	7.27e-05	Similar to Superoxide dismutase (EC 1.15.1.1). (Os03t0219200-01)
Os04g0577500	1.2596	0.000178788	Deoxyribonuclease, TatD Mg-dependent domain containing protein. (Os04t0577500-01);Deoxyribonuclease, TatD Mg-dependent domain containing protein. (Os04t0577500-02)
Os02g0810450	1.25794	0.000123695	Similar to endoribonuclease. (Os02t0810450-01)
Os04g0556000	1.25564	0.0344825	Heavy metal P-type ATPase, Xylem loading of copper (Os04t0556000-01);Similar to heavy metal ATPase. (Os04t0556000-02)
Os01g0616900	1.25238	0.00057212	Ctps protein. (Os01t0616900-00)
Os04g0632300	1.25119	0.0496518	Similar to H0105C05.10 protein. (Os04t0632300-01)
Os03g0240900	1.25012	6.78e-05	Tubulin/FtsZ, GTPase domain containing protein. (Os03t0240900-01)
Os03g0402400	1.24883	0.000712927	Similar to Ribosome-associated protein p40-like. (Os03t0402400-00)
Os07g0606500	1.24834	0.0105856	Hypothetical conserved gene. (Os07t0606500-01);Similar to ATP-dependent RNA helicase, eIF-4A family. (Os07t0606500-02)
Os06g0648500	1.24794	0.000811184	Conserved hypothetical protein. (Os06t0648500-01)
Os03g0208500	1.24776	0.000602588	Integral membrane protein. (Os03t0208500-01);Integral membrane protein, Metal ion transport (Os03t0208500-02)
Os03g0676300	1.24531	0.000135024	Similar to cold shock protein-1. (Os03t0676300-01)
Os08g0113300	1.24511	8.93e-05	Similar to STIP1 homology and U box-containing protein 1. (Os08t0113300-01)
Os01g0881300	1.24473	0.0135778	Non-protein coding transcript. (Os01t0881300-01);MtN3 and saliva related transmembrane protein family protein. (Os01t0881300-02)
Os11g0296800	1.24452	6e-06	Chromatin SPT2 family protein. (Os11t0296800-01)
Os12g0592200	1.24412	9.27e-05	Hypothetical conserved gene. (Os12t0592200-01)
Os11g0171800	1.24409	0.0115417	Protein kinase, core domain containing protein. (Os11t0171800-01)
Os03g0441101	1.24138	0.0214538	Similar to H0323C08.17 protein. (Os03t0441101-00)
Os10g0154000	1.23687	0.00040375	Membrane-trafficking protein, Intracellular SNARE protein, Resistance to rice blast disease (Os10t0154000-01);Similar to vesicle-associated membrane protein 714. (Os10t0154000-02)
Os12g0606600	1.23548	0.00441921	DNA-binding HORMA domain containing protein. (Os12t0606600-01)
Os09g0397900	1.23511	0.00327817	Similar to FEG protein. (Os09t0397900-01)
Os02g0805200	1.2336	0.000133095	Proliferating cell nuclear antigen (PCNA) (Cyclin). (Os02t0805200-01)
Os07g0492300	1.23268	0.0253312	Hypothetical protein. (Os07t0492300-01)
Os03g0822100	1.23084	0.0496518	Similar to Transposase (Fragment). (Os03t0822100-01);Similar to cDNA clone:J033024N05, full insert sequence. (Os03t0822100-02)
Os03g0841100	1.2282	0.00100487	Serine/threonine protein kinase-related domain containing protein. (Os03t0841100-01)
Os04g0455800	1.22669	0.000172054	Similar to Lipoic acid synthetase, mitochondrial precursor (Lip-syn) (Lipoate synthase) (mLIP1). (Os04t0455800-01)
Os03g0349000	1.22646	2.53e-05	Nucleoporin interacting component family protein. (Os03t0349000-01)
Os06g0264650	1.22523	0.00390954	Hypothetical conserved gene. (Os06t0264650-00)
Os12g0490100	1.22449	0.0302591	Pentatricopeptide repeat domain containing protein. (Os12t0490100-01)
Os03g0163200	1.22303	0.0438424	Protein of unknown function DUF247, plant family protein. (Os03t0163200-01)
Os06g0314000	1.22255	0.0225391	Protein of unknown function DUF827, plant domain containing protein. (Os06t0314000-01)
Os11g0207100	1.22097	0.000105617	Similar to SEU3A protein. (Os11t0207100-01)
Os04g0649051	1.21924	0.0012071	Similar to H0211B05.9 protein. (Os04t0649051-01)
Os09g0407900	1.21924	4.25e-05	Peptidase C19, ubiquitin carboxyl-terminal hydrolase 2 family protein. (Os09t0407900-01)
Os03g0691050	1.21859	0.0208485	Hypothetical gene. (Os03t0691050-01)
Os02g0794000	1.21741	0.000717501	Zinc finger, RING-type domain containing protein. (Os02t0794000-01);Non-protein coding transcript. (Os02t0794000-02)
Os08g0377150	1.21618	0.0332112	Conserved hypothetical protein. (Os08t0377150-01)
Os01g0666500	1.21561	0.000677121	Similar to cytochrome B561-related. (Os01t0666500-01)
Os09g0508951	1.21342	5.68e-05	Hypothetical gene. (Os09t0508951-01)
Os12g0488800	1.21181	0.000550078	RNA polymerase II, Rpb4, core domain containing protein. (Os12t0488800-01)
Os03g0151600	1.20963	0.0107843	Acyl-CoA N-acyltransferase domain containing protein. (Os03t0151600-01);Similar to N-acetyltransferase. (Os03t0151600-02)
Os04g0459700	1.20897	0.00554729	Similar to H0219H12.3 protein. (Os04t0459700-01);Nucleosome assembly protein (NAP) family protein. (Os04t0459700-02)
Os02g0800800	1.20786	0.011424	Conserved hypothetical protein. (Os02t0800800-01)
Os02g0800600	1.2078	0.011426	Conserved hypothetical protein. (Os02t0800600-01)
Os07g0103000	1.20635	0.00249797	Similar to GRF zinc finger family protein, expressed. (Os07t0103000-01)
Os06g0571400	1.20605	0.000251412	Similar to Elongation factor 1 gamma-like protein (Fragment). (Os06t0571400-01);Similar to Elongation factor 1 gamma-like protein (Fragment). (Os06t0571400-02)
Os01g0238800	1.2044	0.0402659	Hypothetical conserved gene. (Os01t0238800-01);Similar to NFD6 (NUCLEAR FUSION DEFECTIVE 6). (Os01t0238800-02)
Os03g0427100	1.20176	0.00207719	Zinc finger, RING/FYVE/PHD-type domain containing protein. (Os03t0427100-01)
Os05g0114700	1.20029	0.00228103	Myb-type HTH DNA-binding domain domain containing protein. (Os05t0114700-02)
Os10g0316400	1.19754	0.000125784	Conserved hypothetical protein. (Os10t0316400-01);Hypothetical conserved gene. (Os10t0316400-02)
Os09g0309100	1.1946	0.0323894	Zinc finger, SWIM-type domain containing protein. (Os09t0309100-01);Similar to predicted protein. (Os09t0309100-02);Similar to predicted protein. (Os09t0309100-03)
Os02g0328600	1.19445	7.94e-05	Conserved hypothetical protein. (Os02t0328600-01)
Os01g0706000	1.19345	0.00030825	Similar to RNA polymerase II transcriptional coactivator KELP. (Os01t0706000-01);Similar to RNA polymerase II transcriptional coactivator KELP. (Os01t0706000-02);Similar to RNA polymerase II transcriptional coactivator KELP. (Os01t0706000-03)
Os12g0589100	1.19321	2.44e-05	Similar to Adenine phosphoribosyltransferase. (Os12t0589100-01)
Os08g0326400	1.19265	0.000335742	60S ribosomal protein L7a. (Os08t0326400-01)
Os06g0255700	1.19143	3.18e-05	DEAD-like helicase, N-terminal domain containing protein. (Os06t0255700-01)
Os02g0162766	1.18783	0.0306623	Hypothetical conserved gene. (Os02t0162766-01)
Os06g0697200	1.18675	0.0467184	DEAD-box protein abstrakt. (Os06t0697200-00)
Os02g0778200	1.18547	0.00400606	Isoleucyl-tRNA synthetase domain containing protein. (Os02t0778200-01);Similar to predicted protein. (Os02t0778200-02)
Os07g0418000	1.1839	0.0046214	Similar to predicted protein. (Os07t0418000-01);HAD-like domain domain containing protein. (Os07t0418000-02)
Os08g0234100	1.18381	0.00110901	Conserved hypothetical protein. (Os08t0234100-01)
Os11g0549690	1.18355	0.026665	Hypothetical conserved gene. (Os11t0549690-01)
Os07g0206750	1.18336	0.000252196	Hypothetical gene. (Os07t0206750-01)
Os07g0205200	1.18261	0.0048445	Hypothetical conserved gene. (Os07t0205200-01);Similar to TAF5 (TBP-ASSOCIATED FACTOR 5); nucleotide binding / transcription regulator. (Os07t0205200-02)
Os02g0118850	1.18108	0.0171551	Hypothetical gene. (Os02t0118850-01)
Os02g0467700	1.18105	0.000568659	Glycosyl transferase, family 28, C-terminal domain containing protein. (Os02t0467700-01)
Os12g0212100	1.18067	0.000308158	Similar to A/G-specific adenine DNA glycosylase. (Os12t0212100-00)
Os01g0737800	1.17972	0.000109725	Similar to Farnesyltransferase beta subunit. (Os01t0737800-01);Similar to Protein farnesyltransferase beta subunit (EC 2.5.1.58) (CAAX farnesyltransferase beta subunit) (RAS proteins prenyltransferase beta) (FTase-beta). (Os01t0737800-02)
Os04g0665700	1.17856	2.4e-05	K Homology, type 1, subgroup domain containing protein. (Os04t0665700-01)
Os03g0797700	1.17769	7.29e-05	rRNA-processing protein EFG1 domain containing protein. (Os03t0797700-01);rRNA-processing protein EFG1 domain containing protein. (Os03t0797700-02)
Os07g0227200	1.17706	0.0366324	Conserved hypothetical protein. (Os07t0227200-01)
Os05g0587200	1.17702	0.00329192	Conserved hypothetical protein. (Os05t0587200-01)
Os08g0208400	1.17648	0.000198351	Conserved hypothetical protein. (Os08t0208400-01);Transposon, En/Spm-like domain containing protein. (Os08t0208400-02)
Os10g0500500	1.17643	0.00010009	Similar to 30S Ribosomal protein S18. (Os10t0500500-01)
Os11g0573200	1.1731	0.000113652	Similar to Zinc knuckle family protein, expressed. (Os11t0573200-01)
Os08g0460900	1.17174	0.00223175	Conserved hypothetical protein. (Os08t0460900-00)
Os03g0645100	1.17174	0.00191367	Similar to pyruvate dehydrogenase E1 component subunit beta. (Os03t0645100-01);Similar to pyruvate dehydrogenase E1 component subunit beta. (Os03t0645100-02);Similar to pyruvate dehydrogenase E1 component subunit beta. (Os03t0645100-03)
Os07g0175300	1.16995	0.0382773	Conserved hypothetical protein. (Os07t0175300-01)
Os01g0507500	1.16714	4.14e-05	Transcription elognation factor Eaf, N-terminal domain containing protein. (Os01t0507500-01)
Os11g0298400	1.16674	8.34e-05	Protein of unknown function DUF663 domain containing protein. (Os11t0298400-01)
Os07g0598900	1.16607	3.41e-05	Similar to T1K7.11 protein. (Os07t0598900-01);Hypothetical conserved gene. (Os07t0598900-02)
Os05g0198100	1.16297	0.0424404	Protein of unknown function DUF247, plant domain containing protein. (Os05t0198100-01)
Os08g0237100	1.16266	0.000335023	Conserved hypothetical protein. (Os08t0237100-01)
Os12g0168800	1.16103	0.00248375	Similar to AG-motif binding protein-2. (Os12t0168800-01)
Os04g0411651	1.16069	0.00129844	Hypothetical gene. (Os04t0411651-00)
Os01g0974300	1.15986	0.00014166	Conserved hypothetical protein. (Os01t0974300-01)
CAA33986	1.15978	0.0166494	RNA polymerase beta subunit
Os07g0156732	1.1597	0.000772644	Similar to EIN2. (Os07t0156732-01)
Os07g0157401	1.1597	0.000772634	Similar to EIN2. (Os07t0157401-01)
Os04g0244201	1.15917	0.00102849	Hypothetical protein. (Os04t0244201-01)
Os08g0246800	1.15567	0.00277803	Conserved hypothetical protein. (Os08t0246800-01);Hypothetical conserved gene. (Os08t0246800-02)
Os04g0284500	1.15404	5.72e-05	Transcriptional coactivator SAGA-type complex, Ada1/Tada1 domain containing protein. (Os04t0284500-01);Transcriptional coactivator SAGA-type complex, Ada1/Tada1 domain containing protein. (Os04t0284500-02)
Os01g0721100	1.15378	0.0023135	Conserved hypothetical protein. (Os01t0721100-01)
Os07g0693900	1.15351	0.000237744	HEAT domain containing protein. (Os07t0693900-01)
Os09g0473400	1.1509	0.0129985	Peptidase C12, ubiquitin carboxyl-terminal hydrolase 1 domain containing protein. (Os09t0473400-00)
Os08g0197500	1.15017	0.0487722	Cyclin-like F-box domain containing protein. (Os08t0197500-01)
Os09g0525300	1.14854	8.18e-05	Cyclin-like F-box domain containing protein. (Os09t0525300-01)
Os06g0161300	1.1475	0.000396258	Hypothetical conserved gene. (Os06t0161300-01)
Os03g0133900	1.147	0.00063462	Similar to Serine acetyltransferase (EC 2.3.1.30) (Sat-106). (Os03t0133900-01)
Os02g0584900	1.14603	0.00333697	Conserved hypothetical protein. (Os02t0584900-01)
Os03g0211400	1.14509	0.000430352	Calmodulin-binding, plant family protein. (Os03t0211400-01)
Os09g0248200	1.14399	9.35e-05	Similar to ABI3-interacting protein 2. (Os09t0248200-01);Frigida-like family protein. (Os09t0248200-02);Similar to ABI3-interacting protein 2. (Os09t0248200-03)
Os08g0337300	1.14217	0.000430694	Hypothetical conserved gene. (Os08t0337300-01);Zinc finger, PHD-type domain containing protein. (Os08t0337300-02);Hypothetical conserved gene. (Os08t0337300-03)
Os10g0495600	1.14154	0.00700332	Similar to DNA-directed RNA polymerase. (Os10t0495600-01)
Os06g0632700	1.14102	7.97e-05	MULE transposase, conserved domain domain containing protein. (Os06t0632700-01);Hypothetical conserved gene. (Os06t0632700-02)
Os10g0124400	1.13993	0.0350037	Hypothetical conserved gene. (Os10t0124400-00)
Os05g0462400	1.13934	0.00653474	Lipin, N-terminal conserved region domain containing protein. (Os05t0462400-01)
Os06g0698900	1.13917	7.48e-05	Similar to GATA transcription factor 25. (Os06t0698900-01)
Os04g0620700	1.13907	3.3e-05	Nucleolin-like protein, Salt stress response (Os04t0620700-01);Hypothetical conserved gene. (Os04t0620700-02)
Os01g0921600	1.13851	9.79e-06	Similar to Mitochondrial import receptor subunit TOM20 (Translocase of outer membrane 20 kDa subunit). (Os01t0921600-01)
Os02g0161601	1.13786	0.00432302	Hypothetical gene. (Os02t0161601-00)
Os04g0221300	1.13648	0.00119981	Pentatricopeptide repeat domain containing protein. (Os04t0221300-01);Pentatricopeptide repeat domain containing protein. (Os04t0221300-02)
Os05g0312201	1.13603	0.009437	Hypothetical gene. (Os05t0312201-01)
Os08g0198200	1.13572	0.00965752	Hypothetical conserved gene. (Os08t0198200-00)
Os07g0626700	1.13456	0.0492094	Similar to Peroxidase (EC 1.11.1.7). (Os07t0626700-01)
Os03g0588200	1.13444	0.000294464	Frigida-like family protein. (Os03t0588200-01)
Os06g0682666	1.13287	0.000244481	Hypothetical gene. (Os06t0682666-01)
Os10g0395200	1.13252	0.014548	Conserved hypothetical protein. (Os10t0395200-01)
Os12g0538100	1.1323	0.000525676	rRNA processing domain containing protein. (Os12t0538100-01)
Os11g0592900	1.13054	0.000806287	Thioredoxin domain 2 containing protein. (Os11t0592900-01)
Os05g0230900	1.12935	0.000140294	Similar to Glyoxalase I. (Os05t0230900-01)
Os01g0951000	1.12784	7.41e-05	Conserved hypothetical protein. (Os01t0951000-01);Similar to WD-repeat protein 33. (Os01t0951000-02)
Os11g0127900	1.12775	7.15e-05	Similar to 40S ribosomal protein S16. (Os11t0127900-01)
Os09g0284250	1.12722	0.00821597	Hypothetical gene. (Os09t0284250-01)
Os02g0769800	1.12554	0.000779729	Similar to Mitogen-activated protein kinase kinase kinase 1 (EC 2.7.1.-) (Arabidospsis NPK1-related protein kinase 1). Splice isoform 1S. (Os02t0769800-01)
Os02g0832800	1.12478	0.000591794	Similar to Alpha-1,3-mannosyl-glycoprotein beta-1,2-N- acetylglucosaminyltransferase (EC 2.4.1.101). (Os02t0832800-01);Similar to N-acetylglucosaminyltransferase 1. (Os02t0832800-02)
Os04g0675000	1.12437	0.00056753	Similar to H0103C06.5 protein. (Os04t0675000-01);Hypothetical gene. (Os04t0675000-02);Non-protein coding transcript. (Os04t0675000-03)
Os11g0157600	1.12223	0.000414169	Similar to CCT motif family protein, expressed. (Os11t0157600-01)
Os02g0613600	1.11799	0.000221973	Similar to Trafficking protein particle complex protein 2 (Sedlin) (MBP-1 interacting protein-2A) (MIP-2A). (Os02t0613600-01)
Os09g0103200	1.11738	0.000212281	Conserved hypothetical protein. (Os09t0103200-01)
Os06g0494100	1.11692	0.018714	Serine/threonine protein kinase-related domain containing protein. (Os06t0494100-01);Serine/threonine protein kinase-related domain containing protein. (Os06t0494100-02)
Os07g0192900	1.11664	0.000790214	Hypothetical conserved gene. (Os07t0192900-00)
Os03g0643900	1.11583	0.0123858	Conserved hypothetical protein. (Os03t0643900-01)
Os08g0506700	1.11537	0.000595085	Helix-loop-helix DNA-binding domain containing protein. (Os08t0506700-01)
Os12g0165700	1.11287	0.000446555	Transcription elongation factor, TFIIS/CRSP70, N-terminal domain containing protein. (Os12t0165700-01)
Os04g0469700	1.11264	0.00316043	Hypothetical protein. (Os04t0469700-01)
Os07g0416700	1.11216	0.0084725	Conserved hypothetical protein. (Os07t0416700-00)
Os01g0906450	1.11205	0.00299815	Similar to OSIGBa0145C12.3 protein. (Os01t0906450-01)
Os12g0160500	1.11187	0.000194824	Similar to Associated with HOX family protein, expressed. (Os12t0160500-01);Similar to Associated with HOX family protein, expressed. (Os12t0160500-02)
Os02g0437300	1.10986	0.00806363	Conserved hypothetical protein. (Os02t0437300-01)
Os03g0797600	1.10833	0.00217733	Similar to Helix-loop-helix protein homolog. (Os03t0797600-01);Similar to BHLH transcription factor. (Os03t0797600-02)
Os05g0440250	1.10737	0.000153867	Histone deacetylase superfamily protein. (Os05t0440250-01)
Os07g0113700	1.10718	7.22e-05	Tetratricopeptide-like helical domain containing protein. (Os07t0113700-01)
Os02g0509500	1.10606	0.000150332	Protein of unknown function DUF3339 domain containing protein. (Os02t0509500-01)
Os02g0255200	1.10557	0.00213441	Similar to Ribosomal protein S15a homolog. (Os02t0255200-01);Similar to 40S ribosomal protein S15a. (Os02t0255200-02)
Os01g0918200	1.10354	0.00085185	Similar to Ubiquitin-like protein SMT3. (Os01t0918200-01)
Os03g0667800	1.10351	0.0179976	Ribosomal protein S21e family protein. (Os03t0667800-00)
Os02g0192200	1.10247	5.17e-05	Octicosapeptide/Phox/Bem1p domain containing protein. (Os02t0192200-01)
Os10g0406800	1.10187	2.07e-05	Armadillo-like helical domain containing protein. (Os10t0406800-01)
Os03g0822300	1.10174	0.0157874	Ribosomal RNA methyltransferase J domain containing protein. (Os03t0822300-01)
Os02g0461200	1.10154	0.0124587	Integrase/recombinase, N-terminal domain containing protein. (Os02t0461200-01)
Os09g0410400	1.10152	0.0395173	Zinc finger, RING-type domain containing protein. (Os09t0410400-01)
Os05g0303000	1.10151	0.00438942	Similar to Chloroplast heat shock protein 70. (Os05t0303000-01)
Os07g0571900	1.10013	1.69e-05	Prp18 domain containing protein. (Os07t0571900-01)
Os04g0136802	1.09746	0.00794224	Hypothetical gene. (Os04t0136802-01)
Os01g0679000	1.09704	0.0392891	RNA polymerase III Rpc82, C -terminal domain containing protein. (Os01t0679000-01);Hypothetical conserved gene. (Os01t0679000-02)
Os10g0395500	1.09679	7.89e-05	Proteasome assembly chaperone 3 domain containing protein. (Os10t0395500-01)
Os07g0693500	1.09545	0.000388325	Similar to AMP deaminase 2 (EC 3.5.4.6) (AMP deaminase isoform L). Splice isoform Ex1A-3. (Os07t0693500-01);Hypothetical gene. (Os07t0693500-02)
Os02g0800000	1.0953	0.00166868	PRLI-interacting factor L (Fragment). (Os02t0800000-01)
Os01g0888700	1.09395	0.000365346	RIO-like kinase domain containing protein. (Os01t0888700-01)
Os06g0538200	1.09362	3.85e-05	Conserved hypothetical protein. (Os06t0538200-01)
Os03g0669300	1.09227	4.42e-05	Beta-1,3-glucanase-like protein. (Os03t0669300-01);Beta-1,3-glucanase-like protein. (Os03t0669300-02);Glycoside hydrolase, family 17 protein. (Os03t0669300-03)
Os11g0125500	1.09132	0.0132231	Protein prenyltransferase domain containing protein. (Os11t0125500-01)
Os03g0750100	1.08751	0.00083027	Similar to TPR Domain containing protein, expressed. (Os03t0750100-00)
Os11g0600900	1.08726	0.0457951	Similar to Mannose-6-phosphate isomerase (ManA). (Os11t0600900-01)
Os06g0527500	1.08716	0.0369579	Conserved hypothetical protein. (Os06t0527500-01);Conserved hypothetical protein. (Os06t0527500-02)
Os12g0586400	1.08674	0.00492046	Tubulin/FtsZ, GTPase domain domain containing protein. (Os12t0586400-00)
Os03g0661800	1.08647	0.00543548	PDZ/DHR/GLGF domain containing protein. (Os03t0661800-01)
Os01g0709500	1.08636	0.000507494	Conserved hypothetical protein. (Os01t0709500-01);Conserved hypothetical protein. (Os01t0709500-02);Similar to Serine/threonine-protein kinase PBS1 (EC 2.7.1.37) (AvrPphB susceptible protein 1). (Os01t0709500-03);Similar to Protein kinase. (Os01t0709500-04)
Os06g0506000	1.08626	0.00943984	Conserved hypothetical protein. (Os06t0506000-01)
Os02g0804800	1.08483	0.00449448	Conserved hypothetical protein. (Os02t0804800-01)
Os12g0143300	1.08461	0.00237853	Excinuclease ABC, C subunit, N-terminal domain containing protein. (Os12t0143300-01)
Os02g0637000	1.0821	0.0246348	Similar to OSIGBa0135K14.7 protein. (Os02t0637000-01)
Os01g0795400	1.08132	0.0306937	Similar to Subtilase. (Os01t0795400-01)
Os02g0635200	1.08076	0.000479243	Similar to Nitrilase 2 (EC 3.5.5.1). (Os02t0635200-01)
CAA33956	1.07972	0.0118397	Acetyl-CoA carboxylase beta subunit [Source:UniProtKB/TrEMBL;Acc:E9KIP8]
Os09g0392100	1.07951	0.000552876	Lipase, class 3 family protein. (Os09t0392100-01)
Os04g0398300	1.0793	0.000994777	Similar to Glycyl-tRNA synthetase, mitochondrial precursor (EC 6.1.1.14) (Glycine--tRNA ligase) (GlyRS). (Os04t0398300-01);Similar to H0209H04.1 protein. (Os04t0398300-02)
Os02g0236800	1.07723	0.027414	Similar to Peroxidase (EC 1.11.1.7). (Os02t0236800-01);Similar to Peroxidase (EC 1.11.1.7). (Os02t0236800-02)
Os12g0632000	1.07669	0.00438125	Gly-rich protein, Partner protein of RF5, Fertility restoration (Os12t0632000-01)
Os03g0231950	1.07636	0.0359763	Similar to Helix-loop-helix DNA-binding domain containing protein, expressed. (Os03t0231950-01)
Os11g0569800	1.07622	0.0225722	Protein kinase, catalytic domain domain containing protein. (Os11t0569800-01)
Os08g0188000	1.07618	0.0156181	RNA-binding, CRM domain domain containing protein. (Os08t0188000-01)
Os12g0492600	1.07614	0.0014011	Hypothetical gene. (Os12t0492600-01)
Os03g0125300	1.07601	4.51e-05	D111/G-patch domain containing protein. (Os03t0125300-01)
Os07g0647800	1.07595	8.96e-05	Similar to zinc finger family protein. (Os07t0647800-01);Similar to zinc finger (C3HC4-type RING finger) family protein. (Os07t0647800-02)
Os03g0722400	1.07489	0.0464837	Chromatin remodeling factor, Genome-wide DNA methylation (Os03t0722400-01)
Os07g0281000	1.07452	0.00020422	Nucleotide-binding, alpha-beta plait domain containing protein. (Os07t0281000-01)
Os12g0255200	1.0744	0.0101937	Staphylococcal nuclease (SNase-like), OB-fold domain containing protein. (Os12t0255200-01);Conserved hypothetical protein. (Os12t0255200-02)
Os07g0535200	1.07231	0.00727837	Cyclin-like F-box domain containing protein. (Os07t0535200-01)
Os02g0280000	1.07226	0.000215789	Hypothetical gene. (Os02t0280000-01)
Os01g0510600	1.07187	0.0229593	Tetratricopeptide-like helical domain containing protein. (Os01t0510600-01)
Os03g0593200	1.07082	0.000404125	Similar to CBS domain containing protein, expressed. (Os03t0593200-01)
Os07g0674700	1.07045	6.69e-05	Similar to 60S ribosomal protein L18. (Os07t0674700-01)
Os07g0463100	1.06984	1.48e-05	RNA polymerase subunit, RPB6/omega domain containing protein. (Os07t0463100-01)
Os11g0434000	1.06978	0.0178357	HAD-superfamily phosphatase, subfamily IIIC domain containing protein. (Os11t0434000-01);HAD-superfamily phosphatase, subfamily IIIC domain containing protein. (Os11t0434000-02)
Os07g0589400	1.06904	0.000155528	Similar to Set1 complex component swd2. (Os07t0589400-01);Similar to Set1 complex component swd2. (Os07t0589400-02)
Os01g0921200	1.0685	0.000244452	Mannosyl-oligosaccharide glucosidase, N-glycan formation, Auxin-mediated root development (Os01t0921200-01)
Os04g0524400	1.06803	0.00943099	Similar to OSIGBa0153E02-OSIGBa0093I20.13 protein. (Os04t0524400-01)
Os10g0470900	1.06792	0.00963967	Nucleotide-binding, alpha-beta plait domain containing protein. (Os10t0470900-01);Hypothetical conserved gene. (Os10t0470900-02);Hypothetical conserved gene. (Os10t0470900-03)
Os10g0213800	1.06783	0.0023472	Hypothetical conserved gene. (Os10t0213800-01)
Os05g0201333	1.06715	0.00850201	Hypothetical protein. (Os05t0201333-00)
Os08g0191200	1.06652	0.00445717	Pre-ATP-grasp fold domain containing protein. (Os08t0191200-01)
Os11g0252400	1.06598	0.00465991	Ankyrin repeat containing protein. (Os11t0252400-01);Hypothetical conserved gene. (Os11t0252400-02);Hypothetical conserved gene. (Os11t0252400-03)
Os11g0537375	1.06414	0.00261812	Hypothetical protein. (Os11t0537375-00)
Os09g0451800	1.06403	0.0025589	Protein of unknown function DUF1644 family protein. (Os09t0451800-01)
Os12g0594201	1.06374	0.00245557	Hypothetical gene. (Os12t0594201-00)
Os06g0691800	1.06225	0.0245463	Protein kinase, core domain containing protein. (Os06t0691800-01)
Os04g0398800	1.06197	0.000196123	Similar to H0209H04.5 protein. (Os04t0398800-01)
Os03g0655600	1.06167	0.000100109	MULE transposase, conserved domain domain containing protein. (Os03t0655600-01);MULE transposase, conserved domain domain containing protein. (Os03t0655600-02);Hypothetical conserved gene. (Os03t0655600-03)
Os01g0613300	1.06131	0.00093748	Conserved hypothetical protein CHP02058 domain containing protein. (Os01t0613300-01)
Os03g0105700	1.0612	0.00126974	Protein of unknown function DUF296 domain containing protein. (Os03t0105700-01)
Os03g0201700	1.05763	0.00043269	Histone acetylation protein 2 domain containing protein. (Os03t0201700-01)
Os11g0549700	1.05607	1.52e-05	Ankyrin domain containing protein. (Os11t0549700-01)
Os11g0264700	1.05559	0.00213913	ApaG domain containing protein. (Os11t0264700-01);Cyclin-like F-box domain containing protein. (Os11t0264700-03)
Os01g0806300	1.05484	0.00836622	Conserved hypothetical protein. (Os01t0806300-01)
Os12g0197400	1.05414	0.00091704	Similar to chloroplast outer envelope protein 86. (Os12t0197400-01)
Os08g0483800	1.05409	0.0132274	Hypothetical gene. (Os08t0483800-01)
Os03g0794700	1.05315	5.88e-05	Similar to 40S ribosomal protein S18. (Os03t0794700-01)
Os08g0421825	1.05205	0.0096769	Hypothetical gene. (Os08t0421825-01)
Os02g0684600	1.05137	0.00207954	Similar to predicted protein. (Os02t0684600-01)
Os10g0198600	1.05127	0.00606381	Intron-encoded nuclease 2 domain containing protein. (Os10t0198600-01)
Os02g0227000	1.051	0.0067806	HAD superfamily hydrolase-like, type 3 domain containing protein. (Os02t0227000-01)
Os07g0462000	1.04963	0.00019811	Glutamate--cysteine ligase, GCS2 family protein. (Os07t0462000-01)
Os12g0569700	1.0477	0.0129931	Similar to Heat shock protein 70. (Os12t0569700-01);Non-protein coding transcript. (Os12t0569700-02);Similar to Heat shock protein 70. (Os12t0569700-03)
Os11g0292050	1.04708	0.00825212	Similar to PHD-finger family protein, expressed. (Os11t0292050-00)
Os09g0446000	1.04691	0.00769773	Conserved hypothetical protein. (Os09t0446000-01)
Os01g0944000	1.04647	0.00498659	Conserved hypothetical protein. (Os01t0944000-01);Hypothetical conserved gene. (Os01t0944000-02);Conserved hypothetical protein. (Os01t0944000-03)
Os04g0320200	1.04632	0.0124676	Tetratricopeptide-like helical domain containing protein. (Os04t0320200-01)
Os07g0661300	1.04583	2.82e-05	Similar to Ubiquitin-specific protease 24. (Os07t0661300-01)
Os03g0831500	1.04197	0.0075094	Similar to Phosphoribosylformylglycinamidine cyclo-ligase, chloroplast/mitochondrial precursor (EC 6.3.3.1) (AIRS) (Phosphoribosyl-aminoimidazole synthetase) (AIR synthase) (VUpur5). (Os03t0831500-01)
Os02g0585100	1.04177	0.0365622	Similar to ATFP4. (Os02t0585100-00)
Os01g0531200	1.04057	0.000190354	Phospholipase C, phosphatidylinositol-specific, Y domain domain containing protein. (Os01t0531200-01)
Os05g0108500	1.04016	0.000751507	Nucleotide excision repair, TFIIH, subunit TTDA domain containing protein. (Os05t0108500-01)
Os06g0626200	1.03939	0.00123317	Similar to cDNA, clone: J065099M17, full insert sequence. (Os06t0626200-01);Similar to cDNA, clone: J065099M17, full insert sequence. (Os06t0626200-02)
Os01g0680500	1.03797	0.0489469	Hypothetical protein. (Os01t0680500-01)
Os12g0446500	1.03779	0.00133765	Peptidase M24 family protein. (Os12t0446500-00)
Os11g0146700	1.03665	8.09e-05	Similar to predicted protein. (Os11t0146700-01);RED-like, C-terminal family protein. (Os11t0146700-02)
Os09g0270900	1.03649	0.00239353	BolA-like protein domain containing protein. (Os09t0270900-01);Similar to EMB1374. (Os09t0270900-02)
Os07g0681000	1.03503	8.11e-05	Similar to Eukaryotic translation initiation factor 2 beta subunit (eIF-2-beta) (P38). (Os07t0681000-01)
Os02g0567900	1.03495	5.48e-05	Similar to H0818E04.14 protein. (Os02t0567900-01)
Os04g0692500	1.03468	0.00497746	Similar to antiporter/ drug transporter/ transporter. (Os04t0692500-01);Similar to antiporter/ drug transporter/ transporter. (Os04t0692500-02)
Os06g0248400	1.03455	0.000535309	Poly(ADP-ribose) polymerase, catalytic region domain containing protein. (Os06t0248400-01)
Os11g0550900	1.03372	0.000449647	Conserved hypothetical protein. (Os11t0550900-01)
Os08g0268000	1.03347	0.0012015	Conserved hypothetical protein. (Os08t0268000-01)
Os04g0667500	1.03279	0.00432302	Similar to Candida glabrata strain CBS138 chromosome C complete sequence. (Os04t0667500-01)
Os03g0147700	1.03165	0.0138131	Similar to EMB1691 (EMBRYO DEFECTIVE 1691); S-adenosylmethionine-dependent methyltransferase/ methyltransferase/ nucleic acid binding. (Os03t0147700-01);Similar to MT-A70 family protein, expressed. (Os03t0147700-02)
Os02g0205000	1.03029	4.29e-05	Ribosomal protein L19 family protein. (Os02t0205000-01)
Os10g0567900	1.02883	0.00921725	Similar to F-box protein interaction domain containing protein, expressed. (Os10t0567900-01)
Os12g0288000	1.02703	0.0303781	Similar to cDNA clone:J023146F15, full insert sequence. (Os12t0288000-01);Similar to Integral membrane protein DUF6 containing protein, expressed. (Os12t0288000-02);Similar to Integral membrane protein DUF6 containing protein, expressed. (Os12t0288000-03)
Os07g0595800	1.02637	0.00285022	Prefoldin domain containing protein. (Os07t0595800-01)
Os01g0518500	1.02618	0.00211991	Glycoside hydrolase, family 27 protein. (Os01t0518500-01);Glycoside hydrolase, family 27 protein. (Os01t0518500-02)
Os03g0280700	1.02548	0.000627675	Hypothetical conserved gene. (Os03t0280700-01)
Os03g0298600	1.02459	6.32e-05	Sel1-like domain containing protein. (Os03t0298600-01)
Os02g0165000	1.02414	0.000189257	Zinc finger, RING/FYVE/PHD-type domain containing protein. (Os02t0165000-01);Zinc finger, RING/FYVE/PHD-type domain containing protein. (Os02t0165000-02)
Os02g0704966	1.02356	0.0363318	Hypothetical conserved gene. (Os02t0704966-00)
Os07g0557601	1.02343	0.0377495	Hypothetical gene. (Os07t0557601-00)
Os05g0558800	1.02315	0.000331707	Protein of unknown function DUF1675 family protein. (Os05t0558800-01);Protein of unknown function DUF1675 family protein. (Os05t0558800-02);Similar to UPF0737 protein 8. (Os05t0558800-03)
Os04g0118400	1.02313	0.00264748	Similar to Elongation factor EF-2 (Fragment). (Os04t0118400-01);Similar to H0613H07.5 protein. (Os04t0118400-02);Similar to H0613H07.5 protein. (Os04t0118400-03)
Os01g0718900	1.02265	0.00280244	MADF domain domain containing protein. (Os01t0718900-01)
Os11g0368172	1.0214	0.00269281	Peptidase S8 and S53, subtilisin, kexin, sedolisin domain containing protein. (Os11t0368172-01)
Os03g0435900	1.0214	0.00269281	Peptidase S8 and S53, subtilisin, kexin, sedolisin domain containing protein. (Os03t0435900-01)
Os04g0165600	1.02134	0.0441032	Peptidase S26A, signal peptidase I family protein. (Os04t0165600-01)
Os02g0815900	1.02113	0.0312647	Protein kinase, core domain containing protein. (Os02t0815900-01);Similar to ALE2 (Abnormal Leaf Shape 2); kinase. (Os02t0815900-02)
Os06g0500100	1.02103	0.00312941	Conserved hypothetical protein. (Os06t0500100-01)
Os02g0177800	1.02055	7.59e-05	Similar to calmodulin binding protein. (Os02t0177800-01);Similar to Calmodulin-binding protein 60-B (Fragment). (Os02t0177800-02)
Os01g0262600	1.01971	7.56e-05	Glycosyltransferase, Pollen wall formation (Os01t0262600-01)
Os05g0558000	1.01881	0.00242246	Ribosomal protein L1 family protein. (Os05t0558000-01)
Os07g0137500	1.01837	0.0474375	Transposase, MuDR, plant domain containing protein. (Os07t0137500-01)
Os10g0466700	1.01769	0.000176747	Similar to 60S ribosomal protein L17. (Os10t0466700-01)
Os11g0177200	1.01742	0.00548295	Conserved hypothetical protein. (Os11t0177200-01)
Os02g0129700	1.01685	0.00191814	Hypothetical protein. (Os02t0129700-01)
Os06g0131100	1.01653	0.00144272	Similar to guanine nucleotide-binding protein beta subunit-like protein 1. (Os06t0131100-01);WD40/YVTN repeat-like domain containing protein. (Os06t0131100-02)
Os01g0693800	1.01489	0.0376733	Similar to Threonine synthase, chloroplast precursor (EC 4.2.3.1) (TS). (Os01t0693800-01)
Os02g0761400	1.01481	0.000664208	Similar to ATPREP2. (Os02t0761400-01)
Os07g0162300	1.01439	6.4e-05	Similar to RIO kinase. (Os07t0162300-01)
Os05g0110500	1.01386	0.000310214	Similar to DEAD-box ATP-dependent RNA helicase 17. (Os05t0110500-01);DEAD-box RNA helicase protein, Stress responses (Os05t0110500-02)
Os09g0544300	1.01383	0.000524208	ATMRK serine/threonine protein kinase-like domain containing protein. (Os09t0544300-01)
Os06g0196700	1.01249	0.00727756	Similar to Auxin response factor 1. (Os06t0196700-01);Auxin response factor, Transcription factor, Cytokinin-mediated inhibition of phosphate transport, Phosphate signaling, Auxin and phosphate starvation response (Os06t0196700-02)
Os09g0416500	1.01076	0.021356	Hypothetical conserved gene. (Os09t0416500-01)
Os11g0568600	1.01026	7.34e-05	THUMP domain containing protein. (Os11t0568600-01);Similar to THUMP domain containing protein. (Os11t0568600-02)
Os11g0107450	1.01025	0.00537447	Conserved hypothetical protein. (Os11t0107450-01)
Os01g0550200	1.00984	0.00244766	Cyclin-like F-box domain containing protein. (Os01t0550200-00)
Os10g0469100	1.00972	0.0129914	Hypothetical protein. (Os10t0469100-01);Hypothetical gene. (Os10t0469100-02);Hypothetical protein. (Os10t0469100-03)
Os01g0121700	1.00941	0.000596111	ABC transporter-like domain containing protein. (Os01t0121700-01)
Os04g0172560	1.00938	0.00295528	Hypothetical gene. (Os04t0172560-01)
Os06g0605600	1.00755	0.00827726	Similar to GAMYB-like1. (Os06t0605600-01)
Os07g0184900	1.00691	0.0289535	ATP-dependent DNA helicase 2 subunit KU70, Maintenance of chromosomal stability, Developmental growth, Telomere length regulation (Os07t0184900-01);Hypothetical conserved gene. (Os07t0184900-02);Similar to Ku70 homolog. (Os07t0184900-03);Hypothetical conserved gene. (Os07t0184900-04)
Os12g0596000	1.00596	0.0169547	Similar to Lipoyltransferase (EC 2.3.1.-) (Lipoyl-[acyl-carrier protein]-protein- N-lipoyltransferase) (Lipoate-protein ligase B). (Os12t0596000-02)
Os09g0427300	1.00531	0.0274494	Similar to amino acid carrier. (Os09t0427300-01)
Os06g0130600	1.00507	0.00128037	GAGA binding-like family protein. (Os06t0130600-01)
Os07g0511900	1.00413	0.000193103	Conserved hypothetical protein. (Os07t0511900-01)
Os01g0571766	1.00268	0.0345559	Conserved hypothetical protein. (Os01t0571766-00)
Os10g0501000	1.00151	0.00337779	Pentatricopeptide repeat domain containing protein. (Os10t0501000-01)
Os07g0110000	1.00129	0.00130799	Conserved hypothetical protein. (Os07t0110000-01);Hypothetical conserved gene. (Os07t0110000-02)
Os05g0107700	1.00018	0.000144654	Transcription factor IIA small subunit (Transcription factor IIA gamma subunit). (Os05t0107700-01)
Os07g0201100	-1.00039	0.00177581	Similar to Coatomer gamma subunit (Gamma-coat protein) (Gamma-COP). (Os07t0201100-01)
Os01g0798500	-1.00095	0.0183577	Similar to predicted protein. (Os01t0798500-01);Malate synthase-like family protein. (Os01t0798500-02)
Os01g0581300	-1.00464	0.0317677	Similar to Lycopene epsilon-cyclase (Fragment). (Os01t0581300-01)
Os01g0317800	-1.00487	0.0205871	Alpha/beta hydrolase family protein. (Os01t0317800-01)
Os04g0670000	-1.00512	0.00983056	Reticulon family protein. (Os04t0670000-01)
Os06g0609500	-1.00517	0.001288	Homeodomain-like containing protein. (Os06t0609500-01)
Os02g0135800	-1.00583	0.00538927	Similar to Sec13-like protein (Fragment). (Os02t0135800-01);Similar to Sec13-like protein (Fragment). (Os02t0135800-02);Similar to Sec13p. (Os02t0135800-03)
Os06g0476200	-1.00628	0.0326518	Similar to Phosphoglucomutase precursor (EC 5.4.2.2). (Os06t0476200-01);Similar to predicted protein. (Os06t0476200-02)
Os05g0432500	-1.00691	0.00234719	Similar to Transmembrane protein 18. (Os05t0432500-01)
Os06g0269300	-1.00835	0.0121174	Six-bladed beta-propeller, TolB-like domain containing protein. (Os06t0269300-01);Six-bladed beta-propeller, TolB-like domain containing protein. (Os06t0269300-02)
Os08g0266200	-1.01012	0.000144654	Similar to T24D18.25 protein. (Os08t0266200-01)
Os04g0619400	-1.01088	0.00603741	Protein kinase, core domain containing protein. (Os04t0619400-01)
Os09g0448900	-1.01135	0.00331452	Conserved hypothetical protein. (Os09t0448900-01)
Os03g0746700	-1.01186	0.00159769	Conserved hypothetical protein. (Os03t0746700-01)
Os02g0558500	-1.01198	0.00243373	Conserved hypothetical protein. (Os02t0558500-01)
Os04g0463500	-1.01285	0.0030218	Similar to Anthranilate synthase beta chain. (Os04t0463500-01)
Os07g0584900	-1.01299	0.000155528	Armadillo-like helical domain containing protein. (Os07t0584900-01)
Os07g0658400	-1.01344	0.0120566	Ferredoxin-dependent glutamate synthase, Leaf senescence and nitrogen remobilization (Os07t0658400-02)
Os05g0358000	-1.01457	0.00182495	Conserved hypothetical protein. (Os05t0358000-01);Drought induced 19 family protein. (Os05t0358000-02);Drought induced 19 family protein. (Os05t0358000-03)
Os01g0971500	-1.01463	0.000320124	Similar to Cytochrome b5. (Os01t0971500-01)
Os11g0591100	-1.01473	0.000227193	NAD(P)-binding domain containing protein. (Os11t0591100-01)
Os07g0541500	-1.01484	0.0371239	Similar to KI domain interacting kinase 1. (Os07t0541500-01)
Os10g0206800	-1.0157	0.000450625	Multidrug and toxic compound extrusion (MATE) protein, Al-induced secretion of citrate (Os10t0206800-01);Similar to predicted protein. (Os10t0206800-02)
Os02g0165200	-1.01577	0.0209357	Hypothetical protein. (Os02t0165200-01)
Os06g0171700	-1.0158	0.0455094	Cdk-activating kinase assembly factor (MAT1) family protein. (Os06t0171700-01)
Os03g0595800	-1.01655	0.000691874	Similar to Acyl carrier protein (ACP). (Os03t0595800-01)
Os05g0355200	-1.01728	0.0111391	Pentatricopeptide repeat domain containing protein. (Os05t0355200-00)
Os06g0209300	-1.0179	0.0140241	Hypothetical conserved gene. (Os06t0209300-01);Conserved hypothetical protein. (Os06t0209300-02);Hypothetical conserved gene. (Os06t0209300-03)
Os05g0568900	-1.01931	0.00166959	Similar to Protease Do-like 1, chloroplast precursor (EC 3.4.21.-). (Os05t0568900-01)
Os11g0148000	-1.02131	0.028931	Sodium/calcium exchanger membrane region domain containing protein. (Os11t0148000-01)
Os10g0573100	-1.02177	0.00369754	Similar to AMMECR1 family. (Os10t0573100-01)
Os01g0962400	-1.02249	0.000256813	Ubiquitin-like, Ufm1 domain containing protein. (Os01t0962400-01)
Os02g0135500	-1.0236	0.0107343	Similar to glycosyltransferase. (Os02t0135500-01);Glycosyltransferase AER61, uncharacterized domain containing protein. (Os02t0135500-02)
Os02g0186700	-1.02394	0.0108971	Conserved hypothetical protein. (Os02t0186700-01)
Os02g0104800	-1.02472	0.000128673	Uncharacterised conserved protein UCP022280 domain containing protein. (Os02t0104800-01)
Os11g0282300	-1.02541	0.00188522	Protein of unknown function DUF1685 domain containing protein. (Os11t0282300-01)
Os08g0179000	-1.02552	0.0456774	Protein kinase, catalytic domain domain containing protein. (Os08t0179000-01)
Os03g0581800	-1.02692	8.64e-05	Conserved hypothetical protein. (Os03t0581800-01)
Os02g0762400	-1.02953	0.000611478	CDK inhibitor (CKI), Seed development (Os02t0762400-01)
Os05g0157200	-1.02958	0.000166765	UspA domain containing protein. (Os05t0157200-01)
Os03g0389000	-1.03082	0.00151491	Similar to LOL3. (Os03t0389000-00)
Os01g0557100	-1.03099	0.00419395	Alpha/beta hydrolase family protein. (Os01t0557100-01)
Os01g0759700	-1.03379	0.0255941	Similar to transcription regulator. (Os01t0759700-01);Similar to transcription regulator. (Os01t0759700-02)
Os01g0672800	-1.03457	0.0153184	Protein of unknown function DUF1421 domain containing protein. (Os01t0672800-01)
Os01g0833200	-1.03464	3.37e-05	Similar to expressed protein. (Os01t0833200-01)
Os05g0150500	-1.03585	0.000183299	Similar to Transport inhibitor response 1. (Os05t0150500-00)
Os03g0243800	-1.03639	0.00596785	Nicotinamide N-methyltransferase, putative domain containing protein. (Os03t0243800-00)
Os08g0496900	-1.03645	0.000591362	Nonaspanin (TM9SF) family protein. (Os08t0496900-01)
Os03g0211700	-1.03708	0.00149625	Glycoside hydrolase family 79, N-terminal protein. (Os03t0211700-01);Similar to Heparanase-like protein 2. (Os03t0211700-02)
Os06g0727400	-1.03774	0.00434954	Similar to Protein kinase APK1A, chloroplast precursor (EC 2.7.1.-). (Os06t0727400-01)
Os01g0547500	-1.03869	0.0317355	Similar to Glycosyl hydrolase family 9 protein, expressed. (Os01t0547500-01);Similar to Glycosyl hydrolase family 9 protein, expressed. (Os01t0547500-02)
Os12g0572500	-1.04066	0.01903	Region of unknown function XH domain containing protein. (Os12t0572500-01)
Os06g0266000	-1.04199	0.0320463	Conserved hypothetical protein. (Os06t0266000-01)
Os01g0328900	-1.04275	0.00219428	Glycosyl transferase, family 31 domain containing protein. (Os01t0328900-01)
Os02g0730800	-1.04404	0.00746624	Nucleotide-binding, alpha-beta plait domain containing protein. (Os02t0730800-01)
Os12g0432000	-1.0449	0.0149046	Similar to Protein kinase domain containing protein. (Os12t0432000-00)
Os12g0143100	-1.04492	0.000430458	Similar to GRF zinc finger family protein. (Os12t0143100-01)
Os09g0541500	-1.0456	0.0038416	Sedlin domain containing protein. (Os09t0541500-01)
Os04g0607100	-1.0458	0.0014271	Similar to OSIGBa0113I13.9 protein. (Os04t0607100-01)
Os03g0668033	-1.04597	0.0245739	Hypothetical gene. (Os03t0668033-01)
Os01g0645200	-1.04656	0.00093336	Hypothetical conserved gene. (Os01t0645200-01);Bile acid:sodium symporter domain containing protein. (Os01t0645200-02);Bile acid:sodium symporter domain containing protein. (Os01t0645200-03)
Os01g0948400	-1.04703	0.00180718	Similar to Pyrroline-5-carboxylate reductase (EC 1.5.1.2) (P5CR) (P5C reductase). (Os01t0948400-01);Similar to pyrroline 5-carboxylate reductase. (Os01t0948400-02)
Os01g0742350	-1.04706	0.022711	Conserved hypothetical protein. (Os01t0742350-01)
Os05g0547100	-1.04784	0.000113542	Conserved hypothetical protein. (Os05t0547100-01)
Os05g0108800	-1.04896	0.000172715	Cytochrome b5. (Os05t0108800-01)
Os01g0925800	-1.04968	2.07e-05	Similar to Ubiquitin conjugating enzyme. (Os01t0925800-01)
Os11g0147100	-1.05003	0.00661476	Conserved hypothetical protein. (Os11t0147100-01)
Os09g0261300	-1.05046	0.0014865	Similar to 4-nitrophenylphosphatase-like protein. (Os09t0261300-01);Similar to 4-nitrophenylphosphatase. (Os09t0261300-02)
Os12g0600701	-1.05294	0.000521472	Conserved hypothetical protein. (Os12t0600701-00)
Os04g0439100	-1.05367	0.0336677	Similar to H0525C06.4 protein. (Os04t0439100-01);T-complex 11 family protein. (Os04t0439100-02);Similar to H0525C06.4 protein. (Os04t0439100-03)
Os04g0432600	-1.05386	0.000180404	Similar to H0315E07.2 protein. (Os04t0432600-01);Similar to H0315E07.2 protein. (Os04t0432600-02)
Os06g0134800	-1.05398	0.00324826	Folate-binding, YgfZ domain containing protein. (Os06t0134800-01)
Os01g0901700	-1.05533	0.0230304	Similar to emb2421 (embryo defective 2421); monooxygenase/ oxidoreductase. (Os01t0901700-01)
Os05g0474400	-1.05659	0.00153544	Prenylated rab acceptor PRA1 family protein. (Os05t0474400-01);Non-protein coding transcript. (Os05t0474400-03)
Os01g0672400	-1.05811	0.00199413	Drought induced 19 family protein. (Os01t0672400-01);Similar to Protein DEHYDRATION-INDUCED 19 homolog 3. (Os01t0672400-02);Drought induced 19 family protein. (Os01t0672400-03);Drought induced 19 family protein. (Os01t0672400-04)
Os03g0772800	-1.0606	0.000760318	Cytochrome c oxidase, subunit VIa family protein. (Os03t0772800-01);Cytochrome c oxidase, subunit VIa family protein. (Os03t0772800-02)
Os03g0187600	-1.06082	0.00358837	GRAM domain containing protein. (Os03t0187600-01)
Os04g0565400	-1.06155	0.00805137	cis-Zeatin-O-glucosyltransferase, Catalyze O-glucosylation of cZ and cZ-riboside (Os04t0565400-01)
Os01g0567400	-1.06198	0.0127923	Protein of unknown function DUF3511 domain containing protein. (Os01t0567400-00)
Os01g0647800	-1.06256	0.00336196	Conserved hypothetical protein. (Os01t0647800-01)
Os06g0638900	-1.06391	0.000274189	Similar to calcium-binding protein. (Os06t0638900-01)
Os02g0221600	-1.06465	0.0440751	Similar to predicted protein. (Os02t0221600-00)
Os12g0236900	-1.06476	0.00114762	SET domain containing protein. (Os12t0236900-01)
Os06g0301100	-1.06767	0.0162537	Similar to OSIGBa0124N08.6 protein. (Os06t0301100-01)
Os06g0677800	-1.0679	0.00627562	Similar to P-167-1_1 (Fragment). (Os06t0677800-01)
Os11g0146800	-1.0683	0.00256275	Meiosis-specific DNA recombinase, Synaptonemal complex (SC) assembly (Os11t0146800-01)
Os03g0598900	-1.07065	2.54e-05	Similar to predicted protein. (Os03t0598900-01)
Os02g0306900	-1.07108	0.00956482	Similar to DnaJ-like protein. (Os02t0306900-01)
Os12g0180100	-1.07143	0.0254413	Major facilitator superfamily protein. (Os12t0180100-01);Similar to inorganic phosphate cotransporter. (Os12t0180100-02)
Os06g0490000	-1.07373	0.0010718	Similar to DIMETHYLADENOSINE TRANSFERASE. (Os06t0490000-01)
Os07g0246300	-1.07467	0.00188925	Conserved hypothetical protein. (Os07t0246300-01)
Os01g0880300	-1.07475	0.0162819	Similar to Pectin methylesterase-like protein. (Os01t0880300-02)
Os01g0770500	-1.07533	0.00308158	Similar to ABC transporter ATP-binding protein. (Os01t0770500-01);Similar to ABC transporter ATP-binding protein. (Os01t0770500-02)
Os10g0184200	-1.07559	0.0429446	Protein of unknown function DUF594 family protein. (Os10t0184200-00)
Os02g0816800	-1.0771	0.000207754	NAD(P)-binding domain containing protein. (Os02t0816800-01)
Os10g0481400	-1.07715	0.00127946	Similar to Zinc finger, C3HC4 type family protein, expressed. (Os10t0481400-01);Similar to Zinc finger, C3HC4 type family protein, expressed. (Os10t0481400-02)
Os06g0488600	-1.08031	0.000305708	Similar to Potential phospholipid-transporting ATPase 7 (EC 3.6.3.1) (Aminophospholipid flippase 7). (Os06t0488600-01)
Os12g0112500	-1.08047	0.0108648	Protein-tyrosine phosphatase, dual specificity domain containing protein. (Os12t0112500-01)
Os03g0750500	-1.08156	0.0161142	Hypothetical conserved gene. (Os03t0750500-01)
Os03g0364500	-1.08198	0.0196962	Similar to plectin-related. (Os03t0364500-01)
Os02g0254550	-1.08262	0.0241574	Zinc finger, BED-type predicted domain containing protein. (Os02t0254550-01)
Os11g0546300	-1.08346	0.000425909	Patatin family protein. (Os11t0546300-01)
Os01g0874900	-1.08435	3.9e-05	Similar to Hydroxymethyltransferase. (Os01t0874900-01)
Os03g0702700	-1.08588	0.00183554	Protein of unknown function DUF250 domain containing protein. (Os03t0702700-01);Similar to organic anion transporter. (Os03t0702700-02);Similar to organic anion transporter. (Os03t0702700-03)
Os03g0210600	-1.08643	1.72e-05	Conserved hypothetical protein. (Os03t0210600-01)
Os08g0192800	-1.08962	0.000120142	Bromodomain containing protein. (Os08t0192800-01)
Os01g0218900	-1.091	0.000321762	Zinc finger, PHD-type domain containing protein. (Os01t0218900-01)
Os04g0687100	-1.09121	0.000168597	Similar to Soluble inorganic pyrophosphatase (EC 3.6.1.1) (Pyrophosphate phospho- hydrolase) (PPase). (Os04t0687100-01)
Os03g0314200	-1.09164	0.000967249	Cas1p-like family protein. (Os03t0314200-01)
Os02g0620100	-1.09165	0.00386087	Mis12 family protein. (Os02t0620100-01);Mis12 family protein. (Os02t0620100-02)
Os08g0510700	-1.09175	0.000391888	Homeodomain-like containing protein. (Os08t0510700-01);Hypothetical conserved gene. (Os08t0510700-02)
Os05g0420600	-1.0918	0.000309307	Cytochrome c. (Os05t0420600-01)
Os09g0466900	-1.09343	2.56e-05	Similar to Calcium-dependent protein kinase. (Os09t0466900-01);Similar to Serine-threonine protein kinase. (Os09t0466900-02)
Os10g0205300	-1.09637	0.0226673	Glycosyl transferase, family 43 protein. (Os10t0205300-01)
Os06g0115300	-1.09642	0.00122804	Acyl-CoA-binding protein , Stress response (Os06t0115300-01)
Os07g0102400	-1.09759	0.000254675	Protein of unknown function DUF1084 family protein. (Os07t0102400-01)
Os12g0508100	-1.09963	0.000683653	Acrosin precursor (EC 3.4.21.10) (53 kDa fucose-binding protein). (Os12t0508100-00)
Os03g0343500	-1.09973	0.00643936	Similar to 60S ribosomal protein L22-2. (Os03t0343500-01);Similar to 60S ribosomal protein L22-2. (Os03t0343500-03)
Os03g0197850	-1.10024	0.00215977	Hypothetical gene. (Os03t0197850-00)
Os03g0696000	-1.1006	0.000946654	Harpin-induced 1 domain containing protein. (Os03t0696000-01)
Os02g0119800	-1.10093	0.000250118	Similar to Aminoalcoholphosphotransferase. (Os02t0119800-01);Similar to ethanolaminephosphotransferase. (Os02t0119800-02)
Os03g0793500	-1.10159	1.91e-05	Casein kinase I, Photoperiodic control of flowering time, Long-day repression (Os03t0793500-01);Similar to Casein kinase-like protein. (Os03t0793500-02)
Os06g0247500	-1.10171	3.45e-05	Pyrophosphate-fructose 6-phosphate 1-phosphotransferase (PFP) beta subunit, Regulation of carbon metabolism during grain filling (Os06t0247500-01);Similar to pyrophosphate--fructose 6-phosphate 1-phosphotransferase beta subunit. (Os06t0247500-02)
Os02g0282900	-1.10227	0.0154274	Similar to 68 kDa protein HP68. (Os02t0282900-01)
Os01g0128800	-1.10298	0.000403284	Similar to plant synaptotagmin. (Os01t0128800-01)
Os02g0110000	-1.10385	0.0328	Lipase, GDSL domain containing protein. (Os02t0110000-01)
Os01g0252100	-1.10478	6.68e-05	Similar to Glycogen synthase kinase-3 homolog MsK-3 (EC 2.7.1.-). (Os01t0252100-01);Similar to Glycogen synthase kinase-3 homolog MsK-3 (EC 2.7.1.-). (Os01t0252100-02);Similar to Glycogen synthase kinase-3 homolog MsK-3 (EC 2.7.1.-). (Os01t0252100-03)
Os03g0114900	-1.10496	0.00171877	Similar to putaive mitochondrial inner membrane protein [Oryza sativa (japonica cultivar-group)]. (Os03t0114900-01)
Os07g0123000	-1.10635	0.0365427	Cyclin-like F-box domain containing protein. (Os07t0123000-01)
Os07g0614000	-1.10656	0.0197882	Six-bladed beta-propeller, TolB-like domain containing protein. (Os07t0614000-01);Six-bladed beta-propeller, TolB-like domain containing protein. (Os07t0614000-02)
Os09g0258000	-1.10716	0.0025955	Cellular retinaldehyde-binding/triple function, C-terminal domain containing protein. (Os09t0258000-01);Similar to predicted protein. (Os09t0258000-02)
Os06g0710300	-1.10718	0.00927002	Uncharacterised conserved protein UCP022348 domain containing protein. (Os06t0710300-01)
Os03g0581100	-1.10749	0.00648295	Hypothetical conserved gene. (Os03t0581100-01)
Os10g0422075	-1.10885	0.00396102	Similar to Viral A-type inclusion protein repeat containing protein, expressed. (Os10t0422075-00)
Os05g0362300	-1.11154	0.00376036	Protein of unknown function DUF538 family protein. (Os05t0362300-01)
Os02g0699300	-1.11351	0.000295725	Similar to ADP-ribosylation factor-like protein. (Os02t0699300-01)
Os07g0671100	-1.11549	0.0428406	Hypothetical conserved gene. (Os07t0671100-01)
Os06g0581300	-1.11605	6.13e-05	Hypothetical conserved gene. (Os06t0581300-01);Protein of unknown function DUF1475 family protein. (Os06t0581300-02)
Os04g0403200	-1.11777	0.0102426	Zinc finger, RING-type domain containing protein. (Os04t0403200-01)
Os09g0478600	-1.11886	0.0156815	Zinc finger, RING/FYVE/PHD-type domain containing protein. (Os09t0478600-01)
Os04g0495300	-1.11907	0.00541078	Similar to OSIGBa0159F11.7 protein. (Os04t0495300-01)
Os03g0248600	-1.11955	6.65e-05	Similar to Enolase 2 (EC 4.2.1.11) (2-phosphoglycerate dehydratase 2) (2-phospho- D-glycerate hydro-lyase 2). (Os03t0248600-01);Similar to Enolase 2 (EC 4.2.1.11) (2-phosphoglycerate dehydratase 2) (2-phospho- D-glycerate hydro-lyase 2). (Os03t0248600-02)
Os02g0648900	-1.12103	0.0419293	Hypothetical protein. (Os02t0648900-01)
Os03g0292800	-1.12157	0.000526467	Similar to Ran binding protein 1 homolog. (Os03t0292800-01)
Os08g0232000	-1.12178	0.000339508	Similar to Glucose-6-phosphate isomerase. (Os08t0232000-01)
Os04g0636100	-1.12217	0.00402468	Glycosyl transferase, family 8 protein. (Os04t0636100-01)
Os11g0425600	-1.1229	0.000140845	Four F5 protein family protein. (Os11t0425600-01)
Os03g0160400	-1.1234	0.00719696	Similar to ACL098Cp. (Os03t0160400-01)
Os05g0430900	-1.1241	0.00141228	TGF-beta receptor, type I/II extracellular region family protein. (Os05t0430900-01)
Os03g0774300	-1.12474	0.00842384	HAD superfamily (subfamily IG) hydrolase, 5'-Nucleotidase protein. (Os03t0774300-01);Similar to cDNA clone:J013088P07, full insert sequence. (Os03t0774300-02);Similar to cDNA clone:J013088P07, full insert sequence. (Os03t0774300-03)
Os05g0352800	-1.12627	5.81e-05	Conserved hypothetical protein. (Os05t0352800-01)
Os02g0533200	-1.12643	0.000706096	SOUL haem-binding protein domain containing protein. (Os02t0533200-00)
Os02g0178100	-1.12727	0.00108858	Similar to CONSTANS-like protein CO6. (Os02t0178100-01)
Os06g0194000	-1.12918	0.00447605	AP2/ERF transcription factor, Drought resistance, Control of lignin biosynthesis (Os06t0194000-01);Similar to Ethylene-responsive transcription factor 3 (Ethylene-responsive element binding factor 3 homolog) (EREBP-5) (NtERF5). (Os06t0194000-02)
Os08g0339200	-1.12921	0.00060567	Uncharacterized conserved protein UCP016210 domain containing protein. (Os08t0339200-01)
Os09g0296700	-1.12952	0.00113824	Glycosyl transferase, group 1 domain containing protein. (Os09t0296700-01)
Os02g0566400	-1.13179	0.000517422	Similar to OSIGBa0152K17.7 protein. (Os02t0566400-01)
Os01g0937400	-1.13192	0.000218159	NB-ARC domain containing protein. (Os01t0937400-01);Hypothetical conserved gene. (Os01t0937400-02)
Os12g0533800	-1.13261	0.000938834	Mitochondrial substrate/solute carrier domain containing protein. (Os12t0533800-01)
Os06g0112100	-1.13304	0.00972614	Nucleoside phosphorylase, family 1 domain containing protein. (Os06t0112100-01)
Os05g0388400	-1.13705	0.000273064	Similar to cDNA clone:J013089M16, full insert sequence. (Os05t0388400-01)
Os02g0635600	-1.13809	0.00592636	Tyrosine protein kinase domain containing protein. (Os02t0635600-01)
Os01g0157900	-1.13825	0.00149201	Protein of unknown function Cys-rich family protein. (Os01t0157900-01)
Os06g0215400	-1.13857	0.00332272	Peptidase S9, prolyl oligopeptidase active site region domain containing protein. (Os06t0215400-01)
Os04g0665600	-1.13882	0.00230693	Similar to Phosphate starvation response regulator-like protein. (Os04t0665600-01)
Os12g0127800	-1.13907	0.00409926	Similar to VQ motif family protein. (Os12t0127800-01)
Os05g0567800	-1.13987	0.00058395	Similar to solute carrier family 2, facilitated glucose transporter member 8. (Os05t0567800-01);Similar to Integral membrane protein. (Os05t0567800-02)
Os12g0132000	-1.14004	0.00405322	Hypothetical protein. (Os12t0132000-01)
Os03g0712400	-1.14094	0.00656274	Similar to atypical receptor-like kinase MARK. (Os03t0712400-01);Similar to Atypical receptor-like kinase MARK. (Os03t0712400-02)
Os07g0165700	-1.14228	0.00487894	Conserved hypothetical protein. (Os07t0165700-01)
Os05g0477900	-1.14235	0.0336361	Similar to nonspecific lipid-transfer protein. (Os05t0477900-01)
Os05g0585500	-1.14306	0.00110009	Similar to Calcium-dependent protein kinase. (Os05t0585500-01)
Os09g0315100	-1.14381	0.0350795	Similar to Endoribonuclease Dicer homolog 2b. (Os09t0315100-01)
Os02g0187700	-1.14442	0.0460079	Similar to Myb-related protein B (B-Myb) (Myb-related protein 1) (XMYB1). (Os02t0187700-00)
Os01g0769000	-1.14697	0.00910211	Topoisomerase II-associated protein PAT1 domain containing protein. (Os01t0769000-01);Similar to predicted protein. (Os01t0769000-02)
Os10g0575700	-1.14699	0.00121718	Similar to plastid-lipid associated protein 3. (Os10t0575700-00)
Os08g0121900	-1.14711	0.032453	Protein of unknown function DUF23 family protein. (Os08t0121900-01);Similar to predicted protein. (Os08t0121900-02)
Os02g0828200	-1.14802	0.0110198	TPR-like domain containing protein. (Os02t0828200-01)
Os11g0123400	-1.14906	0.000553883	Similar to Phosphoethanolamine cytidylyltransferase. (Os11t0123400-00)
Os03g0331900	-1.15076	4.34e-05	Yos1-like domain containing protein. (Os03t0331900-01)
Os07g0655900	-1.15173	0.00219675	SNARE associated Golgi protein domain containing protein. (Os07t0655900-01);Similar to predicted protein. (Os07t0655900-02)
Os02g0816700	-1.15193	0.0145925	Conserved hypothetical protein. (Os02t0816700-01)
Os11g0184100	-1.15221	0.0336006	3-oxo-5-alpha-steroid 4-dehydrogenase, C-terminal domain containing protein. (Os11t0184100-01)
Os01g0747700	-1.1533	0.000524771	RNA-binding S4 domain containing protein. (Os01t0747700-01)
Os01g0841100	-1.1537	0.0332112	FAS1 domain domain containing protein. (Os01t0841100-01)
Os10g0567000	-1.15479	0.00591689	Camphor resistance CrcB protein family protein. (Os10t0567000-01);Hypothetical gene. (Os10t0567000-02)
Os06g0693000	-1.15538	0.033746	Protein kinase, core domain containing protein. (Os06t0693000-01)
Os01g0860800	-1.15581	0.00131744	Glycoside hydrolase, family 17 protein. (Os01t0860800-01);Glycoside hydrolase, family 17 protein. (Os01t0860800-02)
Os11g0575900	-1.15962	0.0252365	Conserved hypothetical protein. (Os11t0575900-01)
Os07g0225300	-1.16082	0.00720819	OsNAC3 protein. (Os07t0225300-01)
Os02g0645100	-1.16098	0.00888078	Kinesin, motor region domain containing protein. (Os02t0645100-01)
Os05g0168300	-1.16193	0.00161042	Haloacid dehalogenase-like hydrolase domain containing protein. (Os05t0168300-01)
Os01g0200400	-1.16739	0.00132315	Thioredoxin domain 2 containing protein. (Os01t0200400-01)
Os05g0339200	-1.16865	0.00184772	Tubby, C-terminal domain containing protein. (Os05t0339200-01)
Os01g0242900	-1.16867	0.000412744	Similar to 60S ribosomal protein L18A. (Os01t0242900-01);Conserved hypothetical protein. (Os01t0242900-02)
Os09g0530275	-1.16871	0.0284297	Cytochrome P450 domain containing protein. (Os09t0530275-00)
Os12g0163300	-1.17205	0.000287741	Armadillo-like helical domain containing protein. (Os12t0163300-01)
Os03g0128400	-1.17213	0.000660921	Conserved hypothetical protein. (Os03t0128400-01)
Os12g0182800	-1.17425	0.0123746	Similar to predicted protein. (Os12t0182800-01)
Os01g0590700	-1.17428	0.000708128	Peptidase M41 domain containing protein. (Os01t0590700-01);Similar to ATP-dependent zinc metalloprotease FTSH 9, chloroplastic/mitochondrial. (Os01t0590700-02)
Os08g0129900	-1.17515	0.0323721	Conserved hypothetical protein. (Os08t0129900-00)
Os03g0836300	-1.17653	0.00442042	Harpin-induced 1 domain containing protein. (Os03t0836300-01)
Os07g0568900	-1.17663	0.0158426	Conserved hypothetical protein. (Os07t0568900-01)
Os03g0581200	-1.17806	0.0076604	Non-protein coding transcript. (Os03t0581200-01);Hypothetical conserved gene. (Os03t0581200-02);Non-protein coding transcript. (Os03t0581200-03);Hypothetical conserved gene. (Os03t0581200-04)
Os02g0824700	-1.17955	4.52e-05	Similar to Vacuolar ATP synthase subunit F (EC 3.6.3.14) (V-ATPase F subunit) (Vacuolar proton pump F subunit) (V-ATPase 14 kDa subunit). (Os02t0824700-01)
Os11g0481200	-1.18021	0.000128871	Protein of unknown function DUF246, plant family protein. (Os11t0481200-01)
Os12g0106000	-1.1804	0.00804167	Ferritin, Iron storage protein, Iron homeostasis (Os12t0106000-01)
Os02g0662700	-1.1807	0.00713433	Similar to Scl1 protein (Fragment). (Os02t0662700-01);Similar to Scl1 protein (Fragment). (Os02t0662700-02)
Os04g0667900	-1.18102	0.00675783	Regulatory protein RecX family protein. (Os04t0667900-01);Similar to regulatory protein RecX. (Os04t0667900-02)
Os12g0138000	-1.18145	0.0388925	Hypothetical conserved gene. (Os12t0138000-01)
Os04g0556300	-1.18234	0.000138485	Glutathione peroxidase. (Os04t0556300-01);Similar to Glutathione peroxidase. (Os04t0556300-02)
Os04g0601400	-1.18333	0.00085185	EF-HAND 2 domain containing protein. (Os04t0601400-01)
Os01g0764400	-1.18382	0.0012074	Similar to Chorismate mutase, chloroplast precursor (EC 5.4.99.5) (CM-1). (Os01t0764400-01)
Os03g0610650	-1.18471	3.2e-05	Similar to cDNA clone:002-125-A07, full insert sequence. (Os03t0610650-01)
Os01g0223000	-1.18471	0.0156947	Lipase, GDSL domain containing protein. (Os01t0223000-01)
Os06g0225800	-1.18502	0.0439682	Shikimate kinase domain containing protein. (Os06t0225800-01)
Os06g0152100	-1.18518	2.85e-05	Similar to Profilin-2. (Os06t0152100-01)
Os04g0610500	-1.18571	0.0152703	Peptidase M24A, methionine aminopeptidase, subfamily 1 protein. (Os04t0610500-01)
Os04g0601700	-1.18668	5.91e-05	Similar to Vacuolar ATP synthase subunit G 1 (EC 3.6.3.14) (V-ATPase G subunit 1) (Vacuolar proton pump G subunit 1). (Os04t0601700-01);Similar to Vacuolar ATP synthase subunit G 1 (EC 3.6.3.14) (V-ATPase G subunit 1) (Vacuolar proton pump G subunit 1). (Os04t0601700-02)
Os10g0487500	-1.18751	0.0295008	Conserved hypothetical protein. (Os10t0487500-01)
Os02g0745700	-1.18919	0.000718434	Fatty acid hydroxylase domain containing protein. (Os02t0745700-01);Similar to protein SUR2. (Os02t0745700-02)
Os02g0538900	-1.18955	0.0057639	Basic-leucine zipper (bZIP) transcription factor domain containing protein. (Os02t0538900-01)
Os05g0541200	-1.19226	0.00585285	Similar to Lysine decarboxylase-like protein. (Os05t0541200-01)
Os03g0660700	-1.19242	0.0035759	Conserved hypothetical protein. (Os03t0660700-01)
Os02g0131600	-1.19478	0.0086272	Similar to Mitochondrial import receptor subunit TOM22 homolog (Translocase of outer membrane 22 kDa subunit homolog) (TOM9). (Os02t0131600-00)
Os02g0818000	-1.19518	0.000752133	Similar to Brown planthopper-induced resistance protein 1. (Os02t0818000-01)
Os06g0233800	-1.19569	0.0110295	Conserved hypothetical protein. (Os06t0233800-01)
Os08g0112500	-1.19669	0.0397352	Similar to Cyclin-dependent protein kinase-like protein. (Os08t0112500-01);Hypothetical conserved gene. (Os08t0112500-02)
Os07g0152000	-1.19684	0.00910653	Transcription factor , Cold tolerance (Os07t0152000-01)
Os09g0558250	-1.1992	0.00183554	Hypothetical protein. (Os09t0558250-00)
Os03g0187700	-1.20253	0.000869836	Target SNARE coiled-coil region domain containing protein. (Os03t0187700-01)
Os01g0584250	-1.20423	0.00162612	Hypothetical gene. (Os01t0584250-01)
Os06g0342200	-1.20477	2.68e-05	Similar to Eukaryotic translation initiation factor 1A (EIF-1A) (EIF-4C). (Os06t0342200-01)
Os02g0137800	-1.20503	0.0011735	Heterotrimeric G protein gamma subunit 2, Regulation of abiotic stresses (Os02t0137800-01);Similar to G protein gamma subunit 2. (Os02t0137800-02)
Os04g0488300	-1.20574	0.0060947	Hypothetical protein. (Os04t0488300-01)
Os07g0204800	-1.20767	0.000156091	Similar to Charged multivesicular body protein 2a. (Os07t0204800-01);Non-protein coding transcript. (Os07t0204800-02)
Os09g0565400	-1.20924	0.000571295	Lipoprotein, type 6 family protein. (Os09t0565400-01);Similar to predicted protein. (Os09t0565400-02)
Os03g0761900	-1.21099	0.00297922	Similar to Prolyl 4-hydroxylase. (Os03t0761900-01)
Os12g0132300	-1.21258	0.0448219	Similar to Calmodulin (CaM). (Os12t0132300-02)
Os12g0223000	-1.21424	0.0169744	Hypothetical protein. (Os12t0223000-01)
Os10g0579300	-1.21503	2.08e-05	NADH:ubiquinone oxidoreductase 17.2 kD subunit family protein. (Os10t0579300-01)
Os05g0414700	-1.21525	0.0145664	Similar to BRASSINOSTEROID INSENSITIVE 1-associated receptor kinase 1. (Os05t0414700-01)
Os04g0662000	-1.21536	0.000256064	Similar to BSD domain containing protein. (Os04t0662000-00)
Os07g0553600	-1.21596	0.0248378	Hypothetical protein. (Os07t0553600-01);Hypothetical protein. (Os07t0553600-02)
Os05g0412000	-1.21715	0.000485697	Similar to Homeodomain-related. (Os05t0412000-00)
Os08g0425700	-1.21926	0.0341066	Similar to Annexin-like protein. (Os08t0425700-01)
Os09g0394700	-1.22392	0.000664289	Similar to Lysophospholipase-like protein. (Os09t0394700-01)
Os08g0499000	-1.22393	0.0419806	Conserved hypothetical protein. (Os08t0499000-01)
Os04g0450400	-1.22428	0.0135303	Similar to H0818E04.19 protein. (Os04t0450400-01)
Os06g0133900	-1.22686	0.0183809	5-enolpyruvylshikimate-3-phosphate synthase (Os06t0133900-01)
Os04g0512400	-1.23166	0.0463618	Similar to Midline 1 protein (Tripartite motif protein 18). (Os04t0512400-01)
Os06g0234200	-1.23293	0.00214852	Similar to Rac-like GTP-binding protein 4. (Os06t0234200-01);Similar to Rac-like GTP-binding protein 4. (Os06t0234200-02);Similar to RAC-like GTP binding protein ARAC8 (GTPase protein ROP10). (Os06t0234200-03)
Os11g0658800	-1.23572	0.00997518	Pectin lyase fold/virulence factor domain containing protein. (Os11t0658800-01)
Os10g0465000	-1.23626	0.0122035	Hypothetical conserved gene. (Os10t0465000-01);Hypothetical conserved gene. (Os10t0465000-02);Conserved hypothetical protein. (Os10t0465000-03)
Os03g0607200	-1.23643	0.0103734	Gibberellin regulated protein family protein. (Os03t0607200-01)
Os03g0264400	-1.23744	0.00564441	Anthranilate synthase alpha 2 subunit. (Os03t0264400-01);Similar to Anthranilate synthase component I family protein, expressed. (Os03t0264400-02);Similar to Anthranilate synthase component I family protein, expressed. (Os03t0264400-03)
Os01g0905800	-1.23874	1.65e-05	Aldolase C-1. (Os01t0905800-01);Aldolase C-1. (Os01t0905800-02);Aldolase C-1. (Os01t0905800-03)
Os02g0528900	-1.24149	0.0491456	Similar to PDR-like ABC transporter. (Os02t0528900-01)
Os04g0450900	-1.24229	0.0317511	Protein kinase PKN/PRK1, effector domain containing protein. (Os04t0450900-01)
Os03g0120900	-1.24611	0.00675484	Similar to AP2 domain containing protein RAP2.8 (Fragment). (Os03t0120900-01)
Os05g0200280	-1.24793	0.000226667	Similar to prenylated rab acceptor family protein. (Os05t0200280-01)
Os12g0114100	-1.2487	0.0307066	Similar to MAP kinase-like protein. (Os12t0114100-01);Similar to MAP kinase-like protein. (Os12t0114100-02)
Os04g0538400	-1.24882	0.0288505	Similar to Nodulin 21 (N-21). (Os04t0538400-01)
Os01g0805200	-1.24936	0.00404009	Protein of unknown function DUF3007 domain containing protein. (Os01t0805200-01);Protein of unknown function DUF3007 domain containing protein. (Os01t0805200-02)
Os05g0565701	-1.24938	0.017709	Conserved hypothetical protein. (Os05t0565701-00)
Os06g0179900	-1.25007	0.0153616	Major facilitator superfamily protein. (Os06t0179900-01)
Os11g0531800	-1.25162	0.00476197	Hypothetical protein. (Os11t0531800-01)
Os02g0622400	-1.25188	2.23e-06	Glycolipid transfer protein, GLTP domain containing protein. (Os02t0622400-01)
Os09g0420800	-1.25347	0.00072384	Similar to Ubiquitin. (Os09t0420800-01)
Os02g0643900	-1.25385	0.0143806	Gnk2-homologous domain domain containing protein. (Os02t0643900-00)
Os01g0747500	-1.25562	0.0248287	Similar to Dihydroorotase (EC 3.5.2.3). (Os01t0747500-01)
Os08g0555200	-1.25674	8.61e-05	Nonaspanin (TM9SF) family protein. (Os08t0555200-01)
Os02g0203700	-1.25885	0.00350578	Similar to Testis expressed sequence 13A protein. (Os02t0203700-01);Similar to Testis expressed sequence 13A protein. (Os02t0203700-02)
Os07g0510800	-1.26125	0.00591075	Hypothetical conserved gene. (Os07t0510800-02)
Os03g0316900	-1.26187	0.000378677	Similar to NBD-like protein. (Os03t0316900-01)
Os02g0304800	-1.26354	0.035579	Hypothetical conserved gene. (Os02t0304800-01)
Os04g0206700	-1.26473	0.00139405	UDP-glucuronosyl/UDP-glucosyltransferase family protein. (Os04t0206700-01);UDP-glucuronosyl/UDP-glucosyltransferase family protein. (Os04t0206700-02)
Os04g0428500	-1.26609	0.0162997	Conserved hypothetical protein. (Os04t0428500-01)
Os10g0554100	-1.26696	0.000299741	Similar to Oxysterol-binding protein. (Os10t0554100-01)
Os04g0182650	-1.26706	0.0158527	Similar to predicted protein. (Os04t0182650-00)
Os10g0419200	-1.27109	0.00243916	Cys2/His2-type zinc finger transcription factor, Heading date (Os10t0419200-01)
Os03g0807900	-1.27137	0.00120184	Chaperonin-like RbcX family protein. (Os03t0807900-01);Chaperonin-like RbcX family protein. (Os03t0807900-02)
Os01g0902300	-1.27423	0.000213312	Alpha/beta hydrolase fold-3 domain containing protein. (Os01t0902300-01);Similar to esterase. (Os01t0902300-02)
EPlORYSAg000	-1.2746	0.0234952	NA
Os01g0950900	-1.27544	0.0451288	Protein of unknown function DUF221 domain containing protein. (Os01t0950900-01)
Os03g0800900	-1.27623	0.0339663	Hypothetical conserved gene. (Os03t0800900-01)
Os07g0123900	-1.277	0.000367178	Similar to cold shock protein-1. (Os07t0123900-01)
Os07g0208600	-1.2797	0.000672536	Remorin, C-terminal region domain containing protein. (Os07t0208600-01)
Os10g0544900	-1.28367	0.00332435	Similar to Protein phosphatase 2C-like protein. (Os10t0544900-01)
Os10g0419600	-1.28429	0.0302226	Chlorophyllase family protein. (Os10t0419600-00)
Os06g0140900	-1.28645	0.00917141	Sigma factor, regions 3 and 4 domain containing protein. (Os06t0140900-01)
Os04g0182600	-1.28649	0.0212021	Similar to predicted protein. (Os04t0182600-00)
Os07g0290200	-1.28748	0.00478566	Plant lipid transfer protein/seed storage/trypsin-alpha amylase inhibitor domain containing protein. (Os07t0290200-01)
Os01g0242600	-1.28854	0.00264446	C2 calcium-dependent membrane targeting domain containing protein. (Os01t0242600-01);C2 calcium-dependent membrane targeting domain containing protein. (Os01t0242600-02)
Os08g0492500	-1.30253	0.0133474	Zinc finger, RING/FYVE/PHD-type domain containing protein. (Os08t0492500-01)
Os01g0199400	-1.30415	0.000959915	Alpha/beta hydrolase family protein. (Os01t0199400-01);Similar to predicted protein. (Os01t0199400-02)
Os04g0548400	-1.30444	0.0221295	Protein kinase, core domain containing protein. (Os04t0548400-01)
Os01g0711000	-1.30469	0.000396867	Similar to Vacuolar ATP synthase subunit B isoform 2 (EC 3.6.3.14) (V-ATPase B subunit 2) (Vacuolar proton pump B subunit 2). (Os01t0711000-01)
Os01g0920000	-1.30525	0.00518286	Cystathionine beta-synthase, core domain containing protein. (Os01t0920000-01);Cystathionine beta-synthase, core domain containing protein. (Os01t0920000-02)
Os01g0565900	-1.30563	0.000985833	Similar to Protein transport protein Sec61 beta subunit. (Os01t0565900-01);Non-protein coding transcript. (Os01t0565900-02)
Os05g0574600	-1.30736	0.0155289	Similar to 3-ketoacyl-CoA synthase. (Os05t0574600-01)
Os08g0378800	-1.30759	0.0456779	Sterile alpha motif homology 2 domain containing protein. (Os08t0378800-01);Sterile alpha motif homology 2 domain containing protein. (Os08t0378800-02)
Os04g0605300	-1.30793	0.00207719	Leucine-rich repeat, typical subtype containing protein. (Os04t0605300-01);Leucine-rich repeat, typical subtype containing protein. (Os04t0605300-02)
Os11g0629100	-1.31215	0.000650738	Conserved hypothetical protein. (Os11t0629100-00)
Os03g0413400	-1.32126	0.000337846	Glycosyl transferase, family 8 protein. (Os03t0413400-01)
Os09g0467700	-1.32455	0.000118363	Conserved hypothetical protein. (Os09t0467700-01)
Os07g0668900	-1.32567	0.00857686	Similar to Serine/threonine-protein kinase PBS1 (EC 2.7.1.37) (AvrPphB susceptible protein 1). (Os07t0668900-01);Similar to Serine/threonine-protein kinase PBS1 (EC 2.7.1.37) (AvrPphB susceptible protein 1). (Os07t0668900-02)
Os01g0701900	-1.32654	0.00267788	Similar to Phosphatidylinositol transfer-like protein III. (Os01t0701900-01)
Os02g0657600	-1.32952	0.0372709	N-acetyl glutamate kinase 2. (Os02t0657600-00)
Os04g0466600	-1.33303	0.00186328	Agmatine deiminase domain containing protein. (Os04t0466600-01)
Os01g0224300	-1.33359	0.0339414	CHCH domain containing protein. (Os01t0224300-01)
Os01g0750600	-1.33543	0.00175148	Protein kinase-like domain containing protein. (Os01t0750600-01)
Os08g0374600	-1.33551	0.0170931	Similar to Receptor kinase-like protein. (Os08t0374600-00)
Os04g0477300	-1.33663	0.0249702	Similar to OSIGBa0116M22.6 protein. (Os04t0477300-01)
Os08g0520000	-1.33691	0.00849855	Mitochondrial substrate carrier family protein. (Os08t0520000-01)
Os04g0538000	-1.33695	0.016707	Tetratricopeptide TPR-1 domain containing protein. (Os04t0538000-01);Hypothetical gene. (Os04t0538000-02)
Os01g0883100	-1.33838	0.0345658	Similar to PISTILLATA-like MADS box protein. (Os01t0883100-01)
Os07g0634200	-1.34002	0.00350333	Similar to Rab GTP-binding protein Rab11a. (Os07t0634200-01)
Os05g0182600	-1.34045	0.000639403	Similar to SSRP1 protein. (Os05t0182600-01)
Os05g0541301	-1.34571	0.00798817	Hypothetical gene. (Os05t0541301-00)
Os11g0229400	-1.34606	0.0349346	Similar to NBS-LRR protein (Fragment). (Os11t0229400-01)
Os02g0556100	-1.35118	8.78e-06	NAD(P)-binding domain containing protein. (Os02t0556100-01)
Os01g0840200	-1.35578	0.000624429	HSP20-like chaperone domain containing protein. (Os01t0840200-01)
Os01g0750000	-1.35629	0.0430663	Similar to ras-related protein RIC2. (Os01t0750000-01);Similar to Ras-related protein RIC2. (Os01t0750000-02)
Os03g0718100	-1.3565	3.86e-05	Actin 1. (Os03t0718100-01)
Os09g0456700	-1.3569	0.0399926	Conserved hypothetical protein. (Os09t0456700-01)
Os01g0846450	-1.35754	0.00015375	Hypothetical conserved gene. (Os01t0846450-01)
Os06g0622700	-1.35966	0.000698938	bZIP transcription factor, Endoplasmic reticulum stress response (Os06t0622700-01);Active form of bZIP transcription factor, Endoplasmic reticulum stress response (Os06t0622700-02)
Os02g0827200	-1.36132	0.00122323	Similar to Sucrose transporter. (Os02t0827200-01)
Os05g0468900	-1.3632	0.00955143	Zinc finger, RING/FYVE/PHD-type domain containing protein. (Os05t0468900-01)
Os01g0103100	-1.36907	0.00273934	TGF-beta receptor, type I/II extracellular region family protein. (Os01t0103100-01);Similar to predicted protein. (Os01t0103100-02)
Os03g0397400	-1.36939	0.0110538	Similar to Low affinity calcium transporter CAX2 (Fragment). (Os03t0397400-01)
Os07g0421800	-1.37274	0.000466541	Hypothetical conserved gene. (Os07t0421800-01)
Os01g0802200	-1.37359	0.00592636	Conserved hypothetical protein. (Os01t0802200-01)
Os06g0211200	-1.3744	0.00162269	bZIP transcription factor, Positive regulator of ABA signaling, Drought tolerance (Os06t0211200-01);Similar to Abscisic acid responsive elements-binding factor (ABA-responsive element binding protein 1) (AREB1). (Os06t0211200-02)
Os09g0397200	-1.37596	0.0391288	Conserved hypothetical protein. (Os09t0397200-01)
Os03g0392250	-1.37712	0.01324	Hypothetical gene. (Os03t0392250-01)
Os12g0161700	-1.3772	0.00693846	Conserved hypothetical protein. (Os12t0161700-01)
Os04g0463200	-1.3799	0.0223464	Protein of unknown function DUF593 family protein. (Os04t0463200-01)
Os03g0620400	-1.38256	0.0169021	Hypothetical conserved gene. (Os03t0620400-01)
Os11g0106700	-1.38388	0.00163108	Similar to Ferritin 1, chloroplast precursor (EC 1.16.3.1) (ZmFer1). (Os11t0106700-01);Similar to Ferritin 1, chloroplast precursor (EC 1.16.3.1) (ZmFer1). (Os11t0106700-02)
Os07g0273900	-1.38448	0.00218313	Disease resistance protein domain containing protein. (Os07t0273900-01)
Os06g0593800	-1.38602	0.0078326	UDP-glucuronosyl/UDP-glucosyltransferase family protein. (Os06t0593800-01)
Os06g0666400	-1.38792	0.00102096	VQ domain containing protein. (Os06t0666400-01)
Os05g0294600	-1.38884	6.28e-05	Pentatricopeptide repeat domain containing protein. (Os05t0294600-01);Hypothetical conserved gene. (Os05t0294600-02)
Os08g0107400	-1.38943	0.000966433	Similar to GDP-mannose transporter. (Os08t0107400-01);Similar to predicted protein. (Os08t0107400-02)
Os02g0182850	-1.39264	0.000938834	Hypothetical conserved gene. (Os02t0182850-00)
Os08g0296900	-1.39271	0.0367769	Tetratricopeptide-like helical domain containing protein. (Os08t0296900-01);Hypothetical gene. (Os08t0296900-02);Similar to Heat shock protein 70. (Os08t0296900-03)
Os01g0120400	-1.39293	0.00777504	Alanyl-tRNA synthetase, class IIc family protein. (Os01t0120400-01);Alanyl-tRNA synthetase, class IIc family protein. (Os01t0120400-02)
Os07g0182000	-1.39383	0.0273179	Basic leucine zipper transcriptional activator, Grain filling (Os07t0182000-01)
Os10g0392500	-1.3942	0.000706771	Similar to RNA methyltransferase, TrmH family protein, expressed. (Os10t0392500-00)
Os07g0109600	-1.39443	0.00904264	Leo1-like protein family protein. (Os07t0109600-01)
Os03g0102100	-1.39997	0.0401346	Similar to formyltetrahydrofolate deformylase. (Os03t0102100-01);Formyltetrahydrofolate deformylase family protein. (Os03t0102100-02)
Os09g0516200	-1.40037	0.0217032	Similar to Transcription factor RF2a. (Os09t0516200-01);bZIP DNA-binding protein, Disease resistance, Vascular development (Os09t0516200-02)
Os05g0449100	-1.40555	0.0336743	Hypothetical protein. (Os05t0449100-01)
Os12g0267064	-1.4095	0.00495888	Similar to NADP-dependant malate dehydrogenase (Fragment). (Os12t0267064-01)
Os01g0705500	-1.41003	0.000248857	Similar to fiber protein Fb11. (Os01t0705500-01)
Os01g0966200	-1.41065	0.0238364	Protein of unknown function YGGT family protein. (Os01t0966200-01)
Os05g0489200	-1.41119	2.05e-05	Plant lipid transfer protein/seed storage/trypsin-alpha amylase inhibitor domain containing protein. (Os05t0489200-01)
Os06g0698500	-1.41203	0.000128739	Protein of unknown function DUF1336 domain containing protein. (Os06t0698500-01)
Os05g0272900	-1.41376	0.00725192	B-cell receptor-associated 31-like family protein. (Os05t0272900-01)
Os03g0719400	-1.41745	0.00163637	Alpha/beta hydrolase fold-1 domain containing protein. (Os03t0719400-01)
Os11g0586900	-1.42194	0.00262677	Similar to ADP-ribosylation factor-like protein 5. (Os11t0586900-01);Similar to ADP-ribosylation factor-like protein 5. (Os11t0586900-02)
Os06g0597600	-1.42442	0.000486635	Aromatic-ring hydroxylase family protein. (Os06t0597600-01)
Os01g0794500	-1.42664	7.69e-06	Translation initiation factor SUI1 domain containing protein. (Os01t0794500-00)
Os09g0481400	-1.42678	0.0123112	Similar to Caffeoyl-CoA O-methyltransferase (EC 2.1.1.104) (Trans-caffeoyl-CoA 3- O-methyltransferase) (CCoAMT) (CCoAOMT). (Os09t0481400-01)
Os02g0121500	-1.42687	0.00114762	Conserved hypothetical protein. (Os02t0121500-01)
Os01g0857000	-1.42785	0.0169744	Double-stranded RNA-binding-like domain containing protein. (Os01t0857000-01);Similar to CPL2 (CTD phosphatase-like 2); double-stranded RNA binding. (Os01t0857000-02)
Os01g0675800	-1.43142	0.0318144	No apical meristem (NAM) protein domain containing protein. (Os01t0675800-01)
Os11g0274700	-1.43362	0.0418803	Hypothetical conserved gene. (Os11t0274700-01)
Os10g0497432	-1.43774	0.0184956	Similar to PPR protein. (Os10t0497432-01)
Os02g0504900	-1.44089	1.37e-05	Kelch-type beta propeller domain containing protein. (Os02t0504900-01);Similar to f-box family protein. (Os02t0504900-02)
Os08g0548700	-1.44191	0.0083249	Hypothetical conserved gene. (Os08t0548700-01)
Os05g0537400	-1.44381	0.000831945	Similar to Protein phosphatase 2C. (Os05t0537400-00)
Os09g0552300	-1.44512	8.85e-05	Protein kinase, core domain containing protein. (Os09t0552300-01)
Os10g0567600	-1.44713	0.00199413	Uncharacterised protein family UPF0503 domain containing protein. (Os10t0567600-01)
Os12g0628300	-1.45015	0.00946192	Conserved hypothetical protein. (Os12t0628300-01)
Os04g0419200	-1.45661	0.0469567	Hypothetical conserved gene. (Os04t0419200-01)
Os06g0552300	-1.45839	0.00056753	BZR1, transcriptional repressor family protein. (Os06t0552300-01)
Os05g0569000	-1.45962	0.00492587	Hypothetical conserved gene. (Os05t0569000-01)
Os02g0195000	-1.45974	0.0139666	Protein of unknown function DUF2048 domain containing protein. (Os02t0195000-01);Protein of unknown function DUF2048 domain containing protein. (Os02t0195000-02)
Os03g0123800	-1.46007	0.00169047	Similar to Hydrolase. (Os03t0123800-01)
Os07g0452100	-1.46212	0.0337709	Similar to Alpha-galactosidase. (Os07t0452100-00)
Os06g0602400	-1.46461	0.00849349	Similar to DEAD-box protein 3, X-chromosomal (DEAD-box RNA helicase DEAD3) (mDEAD3) (Embryonic RNA helicase) (D1PAS1 related sequence 2). (Os06t0602400-01)
Os02g0615500	-1.46606	0.00444	Protein kinase, core domain containing protein. (Os02t0615500-01);Hypothetical conserved gene. (Os02t0615500-02)
Os09g0571200	-1.47004	0.0308409	C2 domain containing protein. (Os09t0571200-01)
Os02g0797700	-1.47253	0.00118263	Nonaspanin (TM9SF) family protein. (Os02t0797700-01)
Os03g0816800	-1.4749	0.030951	Protein of unknown function DUF567 family protein. (Os03t0816800-01)
Os11g0654800	-1.47634	1.96e-05	Conserved hypothetical protein. (Os11t0654800-01)
Os06g0251100	-1.47823	0.00647727	Membrane attack complex component/perforin (MACPF) domain domain containing protein. (Os06t0251100-00)
Os07g0687200	-1.48117	0.0176304	Similar to Auxin-regulated calmodulin. (Os07t0687200-01);Similar to Calmodulin NtCaM3 (Calmodulin NtCaM4) (Calmodulin NtCaM5) (Calmodulin NtCaM6) (Calmodulin NtCaM7) (Calmodulin NtCaM8) (Calmodulin NtCaM11) (Calmodulin NtCaM12). (Os07t0687200-02);Similar to CAM7 (CALMODULIN 7); calcium ion binding. (Os07t0687200-03)
Os01g0920100	-1.48139	7.08e-05	Conserved hypothetical protein. (Os01t0920100-01)
BAC19885	-1.48142	0.0196004	ATP synthase F0 subunit 9
Os04g0321700	-1.48333	0.000453525	Similar to Serine carboxypeptidase I precursor (EC 3.4.16.5) (Carboxypeptidase C). (Os04t0321700-01);Similar to Serine carboxypeptidase I precursor (EC 3.4.16.5) (Carboxypeptidase C). (Os04t0321700-02)
Os01g0925700	-1.48349	0.0170014	Similar to predicted protein. (Os01t0925700-01)
Os03g0774200	-1.48453	0.00036142	Similar to NADH-ubiquinone oxidoreductase subunit 8 (EC 1.6.5.3). (Os03t0774200-01);Similar to NADH-ubiquinone oxidoreductase subunit 8 (EC 1.6.5.3). (Os03t0774200-02)
Os11g0452400	-1.48651	0.0141464	Conserved hypothetical protein. (Os11t0452400-01);Conserved hypothetical protein. (Os11t0452400-02)
Os02g0672800	-1.48681	0.00075113	Similar to Protein kinase. (Os02t0672800-01)
Os09g0484300	-1.48709	0.0252078	Similar to Polyubiquitin-like protein. (Os09t0484300-01);Similar to Polyubiquitin-like protein. (Os09t0484300-02);Similar to Polyubiquitin-like protein. (Os09t0484300-03)
Os10g0469000	-1.48876	0.00958173	Hypothetical conserved gene. (Os10t0469000-01);Similar to Leucine Rich Repeat family protein. (Os10t0469000-02)
Os04g0586100	-1.49088	0.000701805	Protein of unknown function DUF581 family protein. (Os04t0586100-01)
Os05g0466600	-1.49103	0.00013016	Similar to Histone H4. (Os05t0466600-01)
Os09g0309700	-1.49376	0.000444508	Ethylene response factor, Transcription factor, Negative regulation of ethylene biosynthesis, Drought tolerance (Os09t0309700-01)
Os03g0750400	-1.49585	0.0279271	Hypothetical protein. (Os03t0750400-01)
Os02g0329800	-1.49646	0.00859274	Glycosyltransferase, Xylan biosynthesis (Os02t0329800-01)
Os04g0470300	-1.49747	0.0370202	Uncharacterised protein family UPF0136, Transmembrane domain containing protein. (Os04t0470300-01);Uncharacterised protein family UPF0136, Transmembrane domain containing protein. (Os04t0470300-02)
Os10g0122000	-1.49767	0.00337779	UDP-glucuronosyl/UDP-glucosyltransferase family protein. (Os10t0122000-00)
Os02g0217900	-1.49896	0.0121874	Similar to Cytosolic class II small heat shock protein 4 (Fragment). (Os02t0217900-00)
Os03g0629900	-1.50188	0.0199517	Conserved hypothetical protein. (Os03t0629900-01);Conserved hypothetical protein. (Os03t0629900-02)
Os05g0520200	-1.50204	0.0341586	Similar to predicted protein. (Os05t0520200-01);Peptidyl-tRNA hydrolase, PTH2 domain containing protein. (Os05t0520200-02)
Os02g0771600	-1.50348	0.002944	Similar to 1-aminocyclopropane-1-carboxylate oxidase (Fragment). (Os02t0771600-01);ACC oxidase, Ethylene biosynthesis (Os02t0771600-02)
Os10g0205200	-1.5035	7.97e-05	Similar to Ufm1-conjugating enzyme 1 (Ubiquitin-fold modifier conjugating enzyme 1). (Os10t0205200-01);Similar to Ufm1-conjugating enzyme 1 (Ubiquitin-fold modifier conjugating enzyme 1). (Os10t0205200-02)
Os12g0518000	-1.50494	0.020225	Hypothetical conserved gene. (Os12t0518000-01);Conserved hypothetical protein. (Os12t0518000-02)
Os04g0109500	-1.50982	0.00359514	Legume lectin, beta domain containing protein. (Os04t0109500-01)
Os04g0196600	-1.51379	0.0133105	Glycosyltransferase AER61, uncharacterized domain containing protein. (Os04t0196600-01)
Os02g0448600	-1.51391	0.00595198	Conserved hypothetical protein. (Os02t0448600-01)
Os06g0714300	-1.51459	0.000478596	Auxin responsive SAUR protein family protein. (Os06t0714300-01)
Os07g0659900	-1.51592	0.00104576	Thioredoxin fold domain containing protein. (Os07t0659900-01)
Os07g0231500	-1.52916	7.97e-06	Cyclin-related 2 domain containing protein. (Os07t0231500-01)
Os10g0459900	-1.52924	0.000851797	Conserved hypothetical protein. (Os10t0459900-01);Conserved hypothetical protein. (Os10t0459900-02)
Os10g0357700	-1.53068	0.0191383	Conserved hypothetical protein. (Os10t0357700-01)
Os12g0635500	-1.53266	0.00374775	Protein of unknown function DUF266, plant domain containing protein. (Os12t0635500-01)
Os01g0783200	-1.5351	0.00775252	Similar to Diacylglycerol kinase. (Os01t0783200-01);Similar to Diacylglycerol kinase. (Os01t0783200-02)
Os05g0564400	-1.53568	0.00146845	Similar to GTP-binding protein. (Os05t0564400-02)
Os09g0555450	-1.53816	0.00115293	Conserved hypothetical protein. (Os09t0555450-00)
Os03g0670100	-1.53842	5.3e-05	Similar to ATP-binding protein of ABC transporter. (Os03t0670100-01)
Os04g0586000	-1.54079	0.00715401	Protein of unknown function DUF581 family protein. (Os04t0586000-00)
Os08g0384500	-1.54154	0.0179672	ABC transporter-like domain containing protein. (Os08t0384500-01)
Os02g0709100	-1.54849	0.00174931	Conserved hypothetical protein. (Os02t0709100-01)
Os07g0676900	-1.54934	0.00762625	Similar to Peroxidase (EC 1.11.1.7). (Os07t0676900-01)
Os02g0695800	-1.55287	0.00121844	Similar to oligopeptide transporter 4. (Os02t0695800-01)
Os03g0190400	-1.55994	0.00525004	Hypothetical gene. (Os03t0190400-01)
Os08g0276000	-1.5642	0.00106021	Similar to Transmembrane 9 superfamily protein member 4. (Os08t0276000-01)
Os02g0132200	-1.56544	0.0104953	Conserved hypothetical protein. (Os02t0132200-00)
Os11g0632200	-1.56812	0.000459247	Myb/SANT-like domain domain containing protein. (Os11t0632200-01)
Os08g0545000	-1.56951	0.00115612	Pyridoxal phosphate-dependent transferase, major region, subdomain 1 domain containing protein. (Os08t0545000-01)
Os01g0167100	-1.5697	0.00914334	Hypothetical protein. (Os01t0167100-01);Hypothetical conserved gene. (Os01t0167100-02)
Os04g0635800	-1.57014	0.0341189	Acyl-CoA N-acyltransferase domain containing protein. (Os04t0635800-01);Acyl-CoA N-acyltransferase domain containing protein. (Os04t0635800-03)
Os03g0389900	-1.57022	0.000303742	Cyclin-like F-box domain containing protein. (Os03t0389900-01);Hypothetical conserved gene. (Os03t0389900-02)
Os07g0172600	-1.5733	0.00152078	Pentatricopeptide repeat domain containing protein. (Os07t0172600-00)
Os12g0623600	-1.57594	0.000562584	Protein of unknown function DUF1637 family protein. (Os12t0623600-01)
Os10g0392400	-1.5766	0.0438617	Tify domain containing protein. (Os10t0392400-01)
Os08g0409500	-1.57777	0.036735	VQ domain containing protein. (Os08t0409500-01)
Os01g0898400	-1.57806	0.0432414	Conserved hypothetical protein. (Os01t0898400-01)
Os07g0623600	-1.57842	0.0420657	Similar to mRNA, clone: RTFL01-43-H20. (Os07t0623600-01)
Os11g0425300	-1.57913	0.00156794	Similar to predicted protein. (Os11t0425300-01);Conserved hypothetical protein. (Os11t0425300-02)
Os02g0592400	-1.58101	0.000414169	Hypoxia induced protein conserved region family protein. (Os02t0592400-01)
Os06g0668200	-1.58262	0.00592419	Similar to Phosphoglycerate kinase, cytosolic (EC 2.7.2.3). (Os06t0668200-01)
Os08g0359100	-1.58335	0.000989143	Similar to Lipid phosphate phosphatase 2 (EC 3.1.3.-) (AtLPP2) (Phosphatidic acid phosphatase 2) (AtPAP2) (Prenyl diphosphate phosphatase). (Os08t0359100-01)
Os11g0143500	-1.58446	0.00308635	Similar to L-Galactono-1,4-lactone dehydrogenase. (Os11t0143500-01)
Os02g0572400	-1.58526	0.00150923	Similar to Riboflavin biosynthesis protein ribA, chloroplast precursor [Includes: GTP cyclohydrolase II (EC 3.5.4.25); 3,4-dihydroxy-2-butanone 4- phosphate synthase (DHBP synthase)]. (Os02t0572400-01);Similar to predicted protein. (Os02t0572400-02)
Os07g0628500	-1.59027	0.0102182	Basic helix-loop-helix dimerisation region bHLH domain containing protein. (Os07t0628500-01);Basic helix-loop-helix dimerisation region bHLH domain containing protein. (Os07t0628500-02)
Os01g0571000	-1.59048	0.00600218	Mitochondrial carrier protein domain containing protein. (Os01t0571000-01);Similar to Grave disease carrier protein. (Os01t0571000-02)
Os02g0556900	-1.5924	0.00196343	Similar to H0525C06.6 protein. (Os02t0556900-01);DDT domain containing protein. (Os02t0556900-02)
Os03g0120100	-1.60001	0.000331316	Protein of unknown function DUF284, transmembrane eukaryotic family protein. (Os03t0120100-01)
Os09g0379600	-1.60143	0.0161433	Similar to Homeobox-leucine zipper protein HOX25. (Os09t0379600-00)
Os05g0530400	-1.60369	0.0170691	Heat stress transcription factor Spl7 (Heat shock transcription factor) (Heat shock factor RHSF10). (Os05t0530400-01)
Os02g0589600	-1.60471	0.00471445	Hypothetical conserved gene. (Os02t0589600-01)
Os02g0730900	-1.60523	0.0436084	Pentatricopeptide repeat domain containing protein. (Os02t0730900-00)
Os06g0720601	-1.60764	0.042939	Hypothetical gene. (Os06t0720601-01)
Os06g0722201	-1.60764	0.016749	Hypothetical gene. (Os06t0722201-00)
Os06g0722600	-1.6077	0.016749	Hypothetical gene. (Os06t0722600-00)
Os05g0145900	-1.6109	0.023346	Hypothetical gene. (Os05t0145900-01);Hypothetical protein. (Os05t0145900-02)
Os05g0110000	-1.61183	0.017674	Zinc finger, RING/FYVE/PHD-type domain containing protein. (Os05t0110000-01)
Os11g0274100	-1.61227	0.00117095	Similar to Protein kinase domain containing protein, expressed. (Os11t0274100-00)
Os01g0869500	-1.61675	0.000967838	Plant nuclear matrix 1 family protein. (Os01t0869500-01);Plant nuclear matrix 1 family protein. (Os01t0869500-02)
Os04g0600200	-1.61907	0.0156826	Homodimeric diiron-carboxylate protein, Cyanide-resistant respiration in mitochondria, Reactive oxygen species (ROS) scavenging (Os04t0600200-01)
Os05g0437401	-1.62182	0.0401338	Conserved hypothetical protein. (Os05t0437401-00)
Os06g0164400	-1.62334	0.00620056	Similar to predicted protein. (Os06t0164400-01)
Os08g0531300	-1.62578	0.00581416	DHBP synthase RibB-like alpha/beta domain domain containing protein. (Os08t0531300-01);Similar to yrdC family protein. (Os08t0531300-02)
Os01g0740600	-1.63177	0.000830614	Transferrin receptor-like, dimerisation domain containing protein. (Os01t0740600-01)
Os12g0596201	-1.63884	0.0237271	Hypothetical protein. (Os12t0596201-00)
Os03g0247900	-1.64006	0.00862389	F5O11.14 (ACR8). (Os03t0247900-01)
Os03g0119700	-1.64589	0.0437452	Pentatricopeptide repeat domain containing protein. (Os03t0119700-01);Hypothetical conserved gene. (Os03t0119700-02)
Os01g0313300	-1.64589	0.0219222	Similar to EREBP-3 protein (Fragment). (Os01t0313300-01)
Os01g0111700	-1.64632	0.0138583	Conserved hypothetical protein. (Os01t0111700-01)
Os02g0574100	-1.64825	0.00307379	Sugar/inositol transporter domain containing protein. (Os02t0574100-01)
Os05g0203900	-1.64887	0.0298751	Conserved hypothetical protein. (Os05t0203900-01)
Os04g0548700	-1.65886	0.036954	Homeodomain-like containing protein. (Os04t0548700-01)
Os05g0149400	-1.6613	0.0263363	ACC oxidase, Ethylene biosynthesis (Os05t0149400-01)
Os01g0606900	-1.66288	0.021226	Heat shock protein DnaJ, N-terminal domain containing protein. (Os01t0606900-01)
Os07g0559400	-1.66616	0.0202685	Similar to uncharacterized secreted protein. (Os07t0559400-00)
Os09g0103400	-1.66637	0.036804	Conserved hypothetical protein. (Os09t0103400-01)
Os08g0192200	-1.66805	0.0075662	Conserved hypothetical protein. (Os08t0192200-01)
Os11g0629500	-1.66856	8.04e-06	Similar to Phosphoserine phosphatase, chloroplast precursor (EC 3.1.3.3) (PSP) (O-phosphoserine phosphohydrolase) (PSPase). (Os11t0629500-01)
Os08g0359300	-1.67379	0.00932739	Uncharacterised conserved protein UCP031088, alpha/beta hydrolase, At1g15070 domain containing protein. (Os08t0359300-01);Uncharacterised conserved protein UCP031088, alpha/beta hydrolase, At1g15070 domain containing protein. (Os08t0359300-02)
Os05g0377000	-1.67556	0.00179546	Similar to Acyl carrier protein. (Os05t0377000-01)
Os01g0692000	-1.6761	0.0319926	Similar to Glutathione S-transferase GSTU6. (Os01t0692000-01)
Os10g0561100	-1.6782	0.043307	Similar to Quinone oxidoreductase. (Os10t0561100-01)
Os10g0427300	-1.68301	0.0172201	Similar to BTB/POZ domain containing protein, expressed. (Os10t0427300-01);Similar to BTB/POZ domain containing protein, expressed. (Os10t0427300-02)
Os03g0388500	-1.68572	0.0131551	Similar to Anther ethylene-upregulated protein ER1 (Fragment). (Os03t0388500-01)
Os06g0268700	-1.68891	7.76e-06	Peptidase A1 domain containing protein. (Os06t0268700-01)
Os02g0565500	-1.68997	0.0118537	Similar to Pto kinase interactor 1. (Os02t0565500-01)
Os03g0701400	-1.69341	0.000412744	Similar to Pentatricopeptide repeat protein PPR868-14. (Os03t0701400-01);Conserved hypothetical protein. (Os03t0701400-02)
Os04g0576800	-1.69439	0.00175766	Similar to predicted protein. (Os04t0576800-01);3-oxo-5-alpha-steroid 4-dehydrogenase, C-terminal domain containing protein. (Os04t0576800-02);3-oxo-5-alpha-steroid 4-dehydrogenase, C-terminal domain containing protein. (Os04t0576800-03)
Os04g0572600	-1.70145	0.00139828	Similar to DNA-directed RNA polymerase. (Os04t0572600-01)
Os07g0613600	-1.71196	0.0237559	Hypothetical conserved gene. (Os07t0613600-01)
Os05g0156300	-1.71281	0.035	Similar to protein disulfide isomerase. (Os05t0156300-01);Similar to Protein disulfide isomerase. (Os05t0156300-02);Similar to Protein disulfide isomerase. (Os05t0156300-03)
Os08g0475400	-1.7146	0.0011432	Alpha/beta hydrolase fold-3 domain containing protein. (Os08t0475400-02)
Os03g0222600	-1.71516	0.0379336	Similar to caleosin. (Os03t0222600-01)
Os03g0713100	-1.7173	0.000678827	Similar to dynamin-related protein 1C. (Os03t0713100-01)
Os10g0478500	-1.71797	0.0422564	MATH domain containing protein. (Os10t0478500-00)
Os01g0542700	-1.72274	0.000476265	bZIP transcription factor, bZIP-1 domain containing protein. (Os01t0542700-01)
Os07g0196100	-1.72287	0.00159609	Conserved hypothetical protein. (Os07t0196100-01)
Os02g0106900	-1.72623	0.00089976	Protein kinase, core domain containing protein. (Os02t0106900-01)
Os10g0405500	-1.73428	0.0156959	Coiled-coil protein, Homologous chromosome pairing and synapsis in meiosis (Os10t0405500-01)
Os05g0442550	-1.74178	0.0276708	Similar to H0801D08.16 protein. (Os05t0442550-01)
Os07g0515900	-1.74554	0.0381346	Similar to cDNA, clone: J100054L12, full insert sequence. (Os07t0515900-00)
Os03g0815200	-1.75591	0.00061037	Similar to Methylenetetrahydrofolate reductase (EC 1.5.1.20). (Os03t0815200-01);Similar to Methylenetetrahydrofolate reductase. (Os03t0815200-02);Similar to Methylenetetrahydrofolate reductase. (Os03t0815200-03);Similar to Methylenetetrahydrofolate reductase (Fragment). (Os03t0815200-04)
Os12g0468000	-1.75608	0.00821556	ATPase, AAA-type, core domain containing protein. (Os12t0468000-01);Similar to ATPase 2. (Os12t0468000-02)
Os12g0467700	-1.75613	0.00821556	ATPase, AAA-type, core domain containing protein. (Os12t0467700-01);Similar to ATPase 2. (Os12t0467700-02)
Os02g0832100	-1.76027	0.0256744	Similar to hexose transporter. (Os02t0832100-00)
Os04g0119800	-1.76246	0.00608551	Leucine-rich repeat domain containing protein. (Os04t0119800-01)
Os01g0602400	-1.76249	0.000683393	Similar to Cytochrome P450 monooxygenase CYP72A5 (Fragment). (Os01t0602400-01)
Os12g0623900	-1.76762	3.81e-05	Similar to Ethylene-responsive methionine synthase (Fragment). (Os12t0623900-01);Similar to Methionine synthase protein. (Os12t0623900-02);Similar to Methionine synthase 2 enzyme. (Os12t0623900-03)
Os04g0198733	-1.77	0.000704233	Hypothetical conserved gene. (Os04t0198733-00)
Os05g0581700	-1.77161	0.0419806	Similar to Tie-dyed 1. (Os05t0581700-01)
Os01g0949300	-1.77462	0.00807488	EF-Hand type domain containing protein. (Os01t0949300-01)
Os08g0429225	-1.77719	0.00398992	Hypothetical protein. (Os08t0429225-00)
Os10g0489000	-1.77954	0.00155795	Similar to FIP1. (Os10t0489000-00)
Os12g0179800	-1.78094	0.000612566	NAD-dependent histone deacetylase, silent information regulator Sir2 domain containing protein. (Os12t0179800-01)
Os02g0814300	-1.78624	0.0226243	Cytochrome c, monohaem domain containing protein. (Os02t0814300-01)
Os05g0439300	-1.78705	0.0163123	Pentatricopeptide repeat domain containing protein. (Os05t0439300-01)
Os04g0317300	-1.79042	0.0319791	Similar to OSIGBa0113K06.4 protein. (Os04t0317300-00)
Os11g0208800	-1.79178	0.0219748	Similar to Receptor-like protein kinase. (Os11t0208800-01)
Os07g0617600	-1.79232	0.0120293	Hypothetical conserved gene. (Os07t0617600-01)
Os07g0131250	-1.79234	4.28e-05	Similar to Hexose transporter HT2. (Os07t0131250-00)
Os11g0173900	-1.79632	0.0462064	Similar to Leucine Rich Repeat family protein, expressed. (Os11t0173900-00)
Os09g0509400	-1.80777	0.0110105	Conserved hypothetical protein. (Os09t0509400-01);Hypothetical conserved gene. (Os09t0509400-02)
Os04g0586700	-1.80867	0.0247963	Zinc finger, RING/FYVE/PHD-type domain containing protein. (Os04t0586700-01)
Os05g0182000	-1.8088	0.000898688	Similar to late embryogenesis abundant protein. (Os05t0182000-01)
Os04g0103400	-1.8107	0.0488843	Hypothetical conserved gene. (Os04t0103400-01)
Os07g0575600	-1.81564	0.0371542	Similar to Lectin receptor-type kinase. (Os07t0575600-01);Similar to Lectin-like receptor kinase 7;2. (Os07t0575600-02)
Os01g0587300	-1.81841	0.0327586	Similar to C2 domain-containing protein. (Os01t0587300-00)
Os07g0101200	-1.81934	0.0362415	Pentatricopeptide repeat domain containing protein. (Os07t0101200-01)
Os09g0462200	-1.8197	0.00976231	Alpha/beta hydrolase fold-3 domain containing protein. (Os09t0462200-01)
Os08g0250100	-1.82012	0.00559102	Hypothetical conserved gene. (Os08t0250100-01)
Os02g0794600	-1.82978	0.00129775	Similar to Copper chaperone COX17-1. (Os02t0794600-01)
Os03g0659350	-1.83052	0.000944129	Hypothetical gene. (Os03t0659350-01)
Os03g0412400	-1.83685	0.00315764	Conserved hypothetical protein. (Os03t0412400-01)
Os03g0854100	-1.83961	0.000492094	Similar to ARF GAP-like zinc finger-containing protein ZIGA2 (Fragment). (Os03t0854100-01);Similar to predicted protein. (Os03t0854100-02)
Os05g0568100	-1.84358	0.00105762	Similar to Iron sulfur cluster assembly protein 1, mitochondrial precursor (Iron sulfur cluster scaffold protein 1). (Os05t0568100-01)
Os10g0580900	-1.85387	0.00066074	Conserved hypothetical protein. (Os10t0580900-01);Conserved hypothetical protein. (Os10t0580900-02);Non-protein coding transcript. (Os10t0580900-03)
Os04g0625100	-1.8604	0.0487993	Similar to OSIGBa0148A10.1 protein. (Os04t0625100-01);Similar to OSIGBa0148A10.1 protein. (Os04t0625100-02)
Os08g0444440	-1.86317	0.00333233	Hypothetical conserved gene. (Os08t0444440-01)
Os06g0620600	-1.86418	0.000142573	Hrf1 family protein. (Os06t0620600-01)
Os01g0964000	-1.8666	0.00303771	Similar to VAMP-like protein YKT61 (AtYKT61) (Geranylgeranylated protein 1) (AtGP1). (Os01t0964000-01);Similar to VAMP-like protein YKT61 (AtYKT61) (Geranylgeranylated protein 1) (AtGP1). (Os01t0964000-02)
Os07g0108800	-1.87071	0.0190952	Two-pore K+ channel family protein, K+ homeostasis, Osmotic and drought tolerance (Os07t0108800-01)
Os03g0599800	-1.87982	0.000431916	Reversibly glycosylated polypeptide. (Os03t0599800-01)
Os07g0170200	-1.88157	2.48e-05	Similar to predicted protein. (Os07t0170200-00)
Os02g0761200	-1.88312	0.00105699	Armadillo-like helical domain containing protein. (Os02t0761200-01)
Os01g0868000	-1.88856	0.00203565	AP2/ERF transcription factor, Abiotic stress response, Salt stress response (Os01t0868000-01)
Os06g0598800	-1.88956	0.0481826	Similar to Fatty acid elongase 1-like protein. (Os06t0598800-01)
Os10g0118800	-1.89186	0.01443	Hypothetical conserved gene. (Os10t0118800-00)
Os01g0214500	-1.89245	0.0318144	Conserved hypothetical protein. (Os01t0214500-01)
Os07g0405700	-1.8931	0.00968289	Conserved hypothetical protein. (Os07t0405700-01)
Os05g0208550	-1.89329	0.0131435	Similar to gibberellin 2-beta-dioxygenase. (Os05t0208550-00)
Os12g0236400	-1.89859	0.0153682	Adenylate kinase A (EC 2.7.4.3) (ATP-AMP transphosphorylase). (Os12t0236400-01)
Os10g0430600	-1.9008	0.0280729	Aminotransferase, class-II, pyridoxal-phosphate binding site domain containing protein. (Os10t0430600-01)
Os04g0349600	-1.90431	0.00175908	Pentatricopeptide repeat domain containing protein. (Os04t0349600-01)
Os01g0139700	-1.91223	0.0163962	Conserved hypothetical protein. (Os01t0139700-01)
Os01g0174000	-1.91394	0.000160875	Similar to BZIP transcription factor (Fragment). (Os01t0174000-00)
Os03g0777000	-1.91427	0.032424	Similar to NAC-domain containing protein 19 (ANAC019) (ANAC) (Abscicic-acid- responsive NAC). (Os03t0777000-01)
Os10g0492900	-1.9183	0.0128651	Similar to alpha-galactosidase. (Os10t0492900-01)
Os06g0287500	-1.92801	0.0169547	Similar to Nbs1-ON. (Os06t0287500-01);Similar to NBS-LRR type R protein Nbs7-75. (Os06t0287500-02)
Os05g0506900	-1.93115	0.0231338	Similar to Brix domain-containing protein 1. (Os05t0506900-01)
Os07g0453132	-1.93677	0.0362914	Conserved hypothetical protein. (Os07t0453132-01)
Os02g0634600	-1.93696	0.0229129	Conserved hypothetical protein. (Os02t0634600-01);Similar to predicted protein. (Os02t0634600-02)
Os02g0457500	-1.937	0.0296613	Ankyrin repeat containing protein. (Os02t0457500-01)
Os05g0499600	-1.9388	0.00497649	UDP-glucuronosyl/UDP-glucosyltransferase family protein. (Os05t0499600-01)
Os11g0502700	-1.94237	0.00442922	Glycosyl transferase, family 31 domain containing protein. (Os11t0502700-01)
Os02g0807300	-1.94835	0.0159075	Hypothetical protein. (Os02t0807300-01)
Os04g0209200	-1.95942	0.000828511	Similar to MRP-like ABC transporter. (Os04t0209200-01)
Os01g0136100	-1.96275	0.00173118	16.9 kDa class I heat shock protein 1. (Os01t0136100-01)
Os02g0740500	-1.96826	0.0114097	Conserved hypothetical protein. (Os02t0740500-01)
Os05g0257100	-1.96826	0.0240562	Leucine-rich repeat, plant specific containing protein. (Os05t0257100-01);Similar to SHR5-receptor-like kinase (Fragment). (Os05t0257100-02)
Os12g0608500	-1.96839	0.00765824	Serine/threonine protein kinase-related domain containing protein. (Os12t0608500-01)
Os01g0959750	-1.97311	0.00241327	Conserved hypothetical protein. (Os01t0959750-00)
Os08g0554900	-1.97462	0.0216048	Nonaspanin (TM9SF) family protein. (Os08t0554900-01);Similar to cDNA, clone: J100074O19, full insert sequence. (Os08t0554900-02)
Os05g0414800	-1.98227	0.039506	Hypothetical gene. (Os05t0414800-01)
Os05g0171200	-1.98248	0.00954871	Embryo-specific 3 family protein. (Os05t0171200-01)
Os01g0956075	-1.98388	0.00195634	Armadillo-like helical domain containing protein. (Os01t0956075-00)
Os02g0748300	-1.98663	0.00915797	Similar to VMP3 protein. (Os02t0748300-01);Similar to Kelch motif family protein. (Os02t0748300-02)
Os01g0627400	-1.9867	0.00981157	Similar to Cytochrome P450 monooxygenase CYP72A5 (Fragment). (Os01t0627400-01)
Os01g0601700	-1.99041	0.0114432	Leucine-rich repeat domain containing protein. (Os01t0601700-01)
Os03g0729000	-1.99502	0.00166442	Similar to Peptidase, M50 family. (Os03t0729000-01)
Os02g0515150	-1.99569	0.0414857	Conserved hypothetical protein. (Os02t0515150-01)
Os10g0513900	-1.99739	0.0167461	Cytochrome P450 family protein. (Os10t0513900-01)
Os12g0547600	-2.00054	0.0186948	Calmodulin binding protein-like domain containing protein. (Os12t0547600-01);Hypothetical conserved gene. (Os12t0547600-02)
Os01g0375200	-2.0022	0.0164646	Similar to shikimate biosynthesis protein aroDE. (Os01t0375200-01);Similar to shikimate biosynthesis protein aroDE. (Os01t0375200-02);Similar to shikimate biosynthesis protein aroDE. (Os01t0375200-03)
Os12g0630500	-2.01043	0.0498625	Similar to Thaumatin-like protein. (Os12t0630500-01)
Os12g0230133	-2.01315	0.0337906	Conserved hypothetical protein. (Os12t0230133-01)
Os08g0470700	-2.01347	0.0289914	Similar to carbonic anhydrase. (Os08t0470700-00)
Os06g0109801	-2.0144	0.00837123	Similar to cDNA clone:002-149-F01, full insert sequence. (Os06t0109801-00)
Os02g0201500	-2.01545	0.0182976	Hypothetical conserved gene. (Os02t0201500-00)
Os06g0314100	-2.01789	0.0361074	Conserved hypothetical protein. (Os06t0314100-01)
Os09g0563225	-2.02365	0.00723313	Hypothetical gene. (Os09t0563225-00)
Os07g0300100	-2.02561	0.024541	Hypothetical gene. (Os07t0300100-01)
Os01g0675700	-2.02926	0.0422893	Similar to Auxin-responsive protein IAA14 (Indoleacetic acid-induced protein 14) (SOLITARY-ROOT protein). (Os01t0675700-01);Similar to Auxin-responsive protein IAA14 (Indoleacetic acid-induced protein 14) (SOLITARY-ROOT protein). (Os01t0675700-02)
Os10g0531900	-2.03249	0.0357403	Similar to BZIP-like protein. (Os10t0531900-01)
Os12g0188566	-2.03353	0.000814601	Similar to Thioredoxin (TRX). (Os12t0188566-01)
Os04g0368000	-2.03355	0.0118558	Serine/threonine protein kinase-related domain containing protein. (Os04t0368000-01)
Os02g0796600	-2.03376	0.0130364	Esterase/lipase/thioesterase domain containing protein. (Os02t0796600-01)
Os10g0479500	-2.03756	0.0126019	Similar to carboxy-lyase. (Os10t0479500-01)
Os04g0652700	-2.03859	0.013266	Similar to Nuclease PA3. (Os04t0652700-01);Similar to nuclease PA3. (Os04t0652700-02)
Os02g0577300	-2.04113	0.0332234	Similar to predicted protein. (Os02t0577300-00)
Os01g0865400	-2.04657	0.00394844	UDP-glucuronosyl/UDP-glucosyltransferase family protein. (Os01t0865400-01)
Os10g0395000	-2.05341	0.0101982	Protein kinase, core domain containing protein. (Os10t0395000-01)
Os01g0743800	-2.05858	0.000279342	Similar to histidine-containing phosphotransfer protein 4. (Os01t0743800-00)
Os01g0347200	-2.05888	0.00217002	Conserved hypothetical protein. (Os01t0347200-01)
Os04g0531500	-2.05912	0.00438795	Concanavalin A-like lectin/glucanase domain containing protein. (Os04t0531500-01)
Os09g0530750	-2.06155	0.00414432	Hypothetical protein. (Os09t0530750-00)
Os11g0523110	-2.06869	0.0195613	Similar to Alcohol dehydrogenase-like protein. (Os11t0523110-01)
Os04g0373400	-2.06936	0.0131232	Similar to MATE efflux family protein, expressed. (Os04t0373400-01)
Os12g0561900	-2.07103	0.041623	Similar to UDP-glucoronosyl and UDP-glucosyl transferase family protein, expressed. (Os12t0561900-01)
Os08g0557600	-2.08302	0.000459228	Similar to Monodehydroascorbate reductase (EC 1.6.5.4) (MDAR) (Ascorbate free radical reductase) (AFR reductase). (Os08t0557600-01);Similar to Cytosolic monodehydroascorbate reductase. (Os08t0557600-02)
Os09g0396900	-2.08982	0.00109591	Protein of unknown function DUF125, transmembrane family protein. (Os09t0396900-01);Vacuolar membrane transporter, Fe and Zn translocation between flag leaves and seeds (Os09t0396900-02)
Os05g0171050	-2.08995	0.0213159	Similar to Phospholipase D alpha 1 precursor (EC 3.1.4.4) (PLD alpha 1) (Choline phosphatase 1) (Phosphatidylcholine-hydrolyzing phospholipase D 1). (Os05t0171050-01)
Os02g0602300	-2.09309	0.000800619	Similar to Myelin transcription factor 1 (MYT1) (MYTI) (Proteolipid protein binding protein) (PLPB1). (Os02t0602300-01);Similar to Myelin transcription factor 1 (MYT1) (MYTI) (Proteolipid protein binding protein) (PLPB1). (Os02t0602300-02)
Os05g0513800	-2.09571	0.0107966	Small GTP-binding protein OsRac2. (Os05t0513800-01);Similar to Rac-like GTP-binding protein 2. (Os05t0513800-02)
Os01g0870300	-2.09628	0.000808378	Hypothetical conserved gene. (Os01t0870300-01);Ammonium transporter. (Os01t0870300-02)
Os01g0514600	-2.11252	0.0326127	Similar to Fimbrin 1 (AtFIM1). (Os01t0514600-01)
Os02g0153300	-2.11619	0.0428406	Hypothetical protein. (Os02t0153300-01);Hypothetical protein. (Os02t0153300-02)
Os03g0346200	-2.11763	0.0271298	Conserved hypothetical protein. (Os03t0346200-00)
Os04g0385650	-2.11855	0.0327595	Conserved hypothetical protein. (Os04t0385650-01)
Os10g0503300	-2.1221	0.0408041	Similar to 10-deacetylbaccatin III 10-O-acetyltransferase. (Os10t0503300-00)
Os01g0183850	-2.12985	0.0174085	Conserved hypothetical protein. (Os01t0183850-00)
Os02g0134400	-2.13869	0.000299741	Fumarate reductase/succinate dehydrogenase flavoprotein, C-terminal domain containing protein. (Os02t0134400-01)
Os03g0238600	-2.1425	0.000191328	Similar to Purple acid phosphatase. (Os03t0238600-01)
Os04g0544200	-2.14288	0.0262628	Cyclin-related 2 domain containing protein. (Os04t0544200-01)
Os05g0152266	-2.14696	0.034716	Hypothetical gene. (Os05t0152266-00)
Os09g0500900	-2.14752	0.0362534	Protein of unknown function DUF568 domain containing protein. (Os09t0500900-01)
Os01g0708201	-2.14794	0.0108978	Hypothetical gene. (Os01t0708201-00)
Os09g0522800	-2.15639	0.0233245	Protein of unknown function DUF1618 domain containing protein. (Os09t0522800-01)
Os12g0478200	-2.16043	0.00607885	Hypothetical protein. (Os12t0478200-01);GRAM domain containing protein. (Os12t0478200-02)
Os04g0615200	-2.16122	0.00689654	Hypothetical protein. (Os04t0615200-01)
Os12g0117900	-2.16412	0.0198718	Hypothetical conserved gene. (Os12t0117900-01)
Os01g0121200	-2.1687	0.00474865	Zinc finger, RING/FYVE/PHD-type domain containing protein. (Os01t0121200-01)
Os12g0215950	-2.17891	0.00852703	Similar to Leucine Rich Repeat family protein, expressed. (Os12t0215950-01)
Os01g0752200	-2.19112	0.000460025	Crotonase, core domain containing protein. (Os01t0752200-01)
Os05g0324700	-2.19292	0.0143097	Conserved hypothetical protein. (Os05t0324700-01)
Os10g0459300	-2.19692	0.00186874	Exostosin-like family protein. (Os10t0459300-00)
Os12g0635400	-2.20369	0.0296766	VQ domain containing protein. (Os12t0635400-01)
Os05g0103000	-2.20386	0.025359	Similar to MYC1. (Os05t0103000-01)
Os01g0341750	-2.20467	0.022739	Hypothetical protein. (Os01t0341750-00)
Os03g0255900	-2.20567	0.000868232	Conserved hypothetical protein. (Os03t0255900-01)
Os01g0641800	-2.2132	0.00404476	Similar to Carbonic anhydrase. (Os01t0641800-00)
Os05g0580000	-2.218	0.00980245	Similar to ADP-glucose pyrophosphorylase (EC 2.7.7.27) (Fragment). (Os05t0580000-01)
Os01g0743600	-2.21839	0.00694622	Peptidase S16, lon N-terminal domain containing protein. (Os01t0743600-01);Peptidase S16, lon N-terminal domain containing protein. (Os01t0743600-02)
Os03g0638900	-2.2252	0.0139322	Cyclin-like F-box domain containing protein. (Os03t0638900-01)
Os10g0115550	-2.2288	0.00659516	Similar to gibberellin-regulated family protein. (Os10t0115550-00)
Os02g0574800	-2.23011	0.00985052	Ethylene insensitive 3 domain containing protein. (Os02t0574800-01)
Os03g0719700	-2.2416	0.0125396	Similar to Phytochrome A. (Os03t0719700-01)
Os05g0132800	-2.24281	0.0104397	Conserved hypothetical protein. (Os05t0132800-01)
Os05g0324100	-2.24542	0.00237941	N2,N2-dimethylguanosine tRNA methyltransferase family protein. (Os05t0324100-01)
Os05g0148900	-2.24703	0.0244106	Similar to Glutathione-S-transferase 19E50. (Os05t0148900-01)
Os03g0324600	-2.24784	0.00743828	NB-ARC domain containing protein. (Os03t0324600-01)
Os09g0294300	-2.24887	0.0336801	Ubiquitin-conjugating enzyme/RWD-like domain containing protein. (Os09t0294300-01)
Os02g0762200	-2.25083	0.0247561	Zinc finger, CCHC-type domain containing protein. (Os02t0762200-01)
Os06g0183700	-2.25384	0.0295642	Hypothetical conserved gene. (Os06t0183700-01);Conserved hypothetical protein. (Os06t0183700-02)
Os08g0177000	-2.25553	0.0258372	Hypothetical protein. (Os08t0177000-01)
Os07g0194100	-2.25969	0.0215948	Similar to OSK2 (Fragment). (Os07t0194100-01)
Os08g0249600	-2.26271	0.0473578	Similar to predicted protein. (Os08t0249600-01)
Os09g0486375	-2.26957	0.0136255	Conserved hypothetical protein. (Os09t0486375-00)
Os02g0660100	-2.2703	0.0288627	Hypothetical conserved gene. (Os02t0660100-00)
Os07g0554600	-2.27087	0.034676	F-box domain, Skp2-like domain containing protein. (Os07t0554600-01)
Os12g0114000	-2.27639	0.0364936	Conserved hypothetical protein. (Os12t0114000-01)
Os11g0648100	-2.27781	0.0275165	Kinesin, motor domain domain containing protein. (Os11t0648100-01)
Os01g0775400	-2.27802	0.0451309	Similar to Cytokinin dehydrogenase 5 precursor (EC 1.5.99.12) (Cytokinin oxidase 5) (CKO5) (AtCKX5) (AtCKX6). (Os01t0775400-01)
Os11g0202350	-2.28946	0.0222293	Conserved hypothetical protein. (Os11t0202350-00)
Os12g0222900	-2.29034	0.0214153	Leucine-rich repeat, N-terminal domain containing protein. (Os12t0222900-01)
Os11g0549695	-2.30398	0.01706	Maf-like protein family protein. (Os11t0549695-01)
Os03g0729700	-2.30882	0.0115471	Ribosomal RNA small subunit methyltransferase E domain containing protein. (Os03t0729700-01)
Os09g0560000	-2.31322	0.018829	Armadillo-like helical domain containing protein. (Os09t0560000-01)
Os06g0218300	-2.32228	0.00819122	Zinc finger, RING-type domain containing protein. (Os06t0218300-01)
Os07g0131600	-2.33576	0.001152	Similar to Monosaccharide transporter. (Os07t0131600-01)
Os04g0526800	-2.34452	0.017624	GRAM domain containing protein. (Os04t0526800-01)
Os07g0165100	-2.34836	0.0275597	Similar to predicted protein. (Os07t0165100-01)
Os01g0800300	-2.35896	0.0139568	Immunoglobulin/major histocompatibility complex, conserved site domain containing protein. (Os01t0800300-01);Immunoglobulin/major histocompatibility complex, conserved site domain containing protein. (Os01t0800300-02);Immunoglobulin/major histocompatibility complex, conserved site domain containing protein. (Os01t0800300-03)
Os02g0193300	-2.36832	0.0186573	Conserved hypothetical protein. (Os02t0193300-01)
Os05g0400500	-2.3718	0.0443646	Similar to plasma membrane associated protein. (Os05t0400500-01)
Os06g0283300	-2.3845	0.009306	Similar to nodulation receptor kinase. (Os06t0283300-01);Similar to nodulation receptor kinase. (Os06t0283300-02)
Os07g0560100	-2.38581	0.0276523	Conserved hypothetical protein. (Os07t0560100-00)
Os11g0704800	-2.38726	0.0472763	Similar to Membrane protein. (Os11t0704800-01)
Os02g0621300	-2.39311	0.00247577	Fatty acid hydroxylase domain containing protein. (Os02t0621300-01)
Os12g0151000	-2.40221	0.0368398	Similar to Purple acid phosphatase. (Os12t0151000-01)
Os02g0318400	-2.40919	0.0218267	Conserved hypothetical protein. (Os02t0318400-01)
Os02g0758200	-2.40939	0.0164679	Conserved hypothetical protein. (Os02t0758200-01)
Os05g0498500	-2.42136	0.0114062	Conserved hypothetical protein. (Os05t0498500-01)
Os06g0118900	-2.42373	0.00201796	Hypothetical conserved gene. (Os06t0118900-00)
Os06g0224650	-2.45311	0.0133597	Mitochodrial transcription termination factor-related family protein. (Os06t0224650-01)
Os03g0215400	-2.46007	0.00476093	MADS-domain-containing protein, Sexual reproduction (Os03t0215400-01)
Os11g0599466	-2.47337	0.00587486	Hypothetical gene. (Os11t0599466-01)
Os02g0152400	-2.47871	0.00245557	Rubisco small subunit 1, Reguration of Rubisco catalytic activity (Os02t0152400-01)
Os03g0319400	-2.48056	0.000853968	Serine/threonine protein kinase, Cold stress tolerance, Abiotic stresses (Os03t0319400-01);Similar to CBL-interacting protein kinase 3. (Os03t0319400-02);Similar to CBL-interacting protein kinase 3. (Os03t0319400-03)
Os01g0155800	-2.48322	0.012733	Conserved hypothetical protein. (Os01t0155800-01)
Os03g0327600	-2.48833	0.0218581	Ricin B-related lectin domain containing protein. (Os03t0327600-01)
Os03g0857200	-2.48981	0.0134392	Conserved hypothetical protein. (Os03t0857200-01);Conserved hypothetical protein. (Os03t0857200-02)
Os04g0684600	-2.4919	0.000620478	Similar to H0913C04.5 protein. (Os04t0684600-01)
Os04g0625850	-2.5001	0.0239401	Hypothetical protein. (Os04t0625850-00)
Os01g0114700	-2.50154	0.0310934	Similar to Receptor-like kinase. (Os01t0114700-00)
Os10g0569400	-2.50744	0.0195614	RIR1a protein precursor. (Os10t0569400-01)
Os01g0679550	-2.50789	0.0390252	Similar to Aspartic proteinase nepenthesin-2. (Os01t0679550-00)
Os08g0405700	-2.5113	0.0285805	Similar to Copper chaperone homolog CCH. (Os08t0405700-01)
Os05g0526900	-2.51599	0.00127368	UDP-glucuronosyl/UDP-glucosyltransferase family protein. (Os05t0526900-01)
Os03g0189300	-2.51737	0.0335066	Conserved hypothetical protein. (Os03t0189300-01);Conserved hypothetical protein. (Os03t0189300-02)
Os11g0477400	-2.5226	0.0322323	Hypothetical conserved gene. (Os11t0477400-01);Conserved hypothetical protein. (Os11t0477400-02);Hypothetical conserved gene. (Os11t0477400-03)
Os03g0304800	-2.52777	0.0114904	Lg106-like family protein. (Os03t0304800-01)
Os07g0687900	-2.5284	0.0101117	WSI76 protein induced by water stress. (Os07t0687900-01)
Os07g0613800	-2.53166	0.00336196	Protein of unknown function DUF1677, plant domain containing protein. (Os07t0613800-00)
Os06g0591400	-2.54542	0.00649343	Conserved hypothetical protein. (Os06t0591400-01)
Os06g0105700	-2.55803	0.0487114	Protein of unknown function DUF6, transmembrane domain containing protein. (Os06t0105700-01)
Os01g0742400	-2.5607	0.00378364	Hypothetical conserved gene. (Os01t0742400-01);Protein kinase, core domain containing protein. (Os01t0742400-02)
Os11g0415450	-2.57391	0.0219541	Hypothetical conserved gene. (Os11t0415450-00)
Os08g0476000	-2.57547	0.000816311	Conserved hypothetical protein. (Os08t0476000-01)
Os03g0130300	-2.58319	0.0116653	Similar to Cp-thionin. (Os03t0130300-01)
Os04g0644200	-2.59089	0.0358787	Similar to H0306F03.14 protein. (Os04t0644200-00)
Os04g0564700	-2.5936	0.0184941	WD40 repeat domain containing protein. (Os04t0564700-01);Similar to OSIGBa0158F05.3 protein. (Os04t0564700-02)
Os03g0294600	-2.59576	0.028972	Similar to Importin-beta1. (Os03t0294600-01)
Os10g0441900	-2.60336	0.0158402	Similar to Resistance protein candidate (Fragment). (Os10t0441900-01)
Os02g0485000	-2.61901	0.00495939	Transferase domain containing protein. (Os02t0485000-01)
Os09g0483700	-2.61995	0.0456947	Hypothetical protein. (Os09t0483700-00)
Os01g0358100	-2.62517	0.0410981	Rapid ALkalinization Factor family protein. (Os01t0358100-01)
Os03g0122850	-2.62555	0.0111189	Similar to Ubiquitin conjugating enzyme (Fragment). (Os03t0122850-00)
Os04g0445300	-2.62739	0.0116157	Pectinesterase inhibitor domain containing protein. (Os04t0445300-01)
Os01g0128250	-2.62798	0.0472484	Hypothetical gene. (Os01t0128250-01)
Os04g0634700	-2.63841	0.00652521	Similar to Diacylglycerol kinase. (Os04t0634700-01)
Os08g0178200	-2.64116	0.0153928	Similar to Monosaccharide transporter 3. (Os08t0178200-02)
Os01g0147600	-2.64292	0.0192077	Conserved hypothetical protein. (Os01t0147600-00)
Os03g0716200	-2.64405	0.0131514	Zinc finger, PHD-type domain containing protein. (Os03t0716200-01)
Os11g0557500	-2.64904	0.0175856	Protein kinase, core domain containing protein. (Os11t0557500-00)
Os10g0175500	-2.66537	0.016927	Hypothetical gene. (Os10t0175500-01)
Os05g0443800	-2.66631	0.00667324	Similar to Plastid division protein ftsZ1 precursor. (Os05t0443800-01)
Os04g0594100	-2.66663	0.00329647	MYB transcription factor, Regulation of cellulose biosynthesis during secondary cell wall formation (Os04t0594100-01)
Os11g0474450	-2.68142	0.0136036	Hypothetical gene. (Os11t0474450-01)
Os07g0298900	-2.68379	0.0146004	Heavy metal transport/detoxification protein domain containing protein. (Os07t0298900-01)
Os06g0202100	-2.68457	0.0275502	Conserved hypothetical protein. (Os06t0202100-01)
Os03g0695400	-2.68509	0.009702	Ankyrin repeat containing protein. (Os03t0695400-01)
Os04g0212450	-2.68617	0.0397352	Hypothetical conserved gene. (Os04t0212450-00)
Os07g0147600	-2.6995	0.0184134	Protein kinase, core domain containing protein. (Os07t0147600-01);Similar to predicted protein. (Os07t0147600-02);Protein kinase, core domain containing protein. (Os07t0147600-03)
Os09g0559500	-2.70291	0.00219675	Protein of unknown function DUF594 domain containing protein. (Os09t0559500-01)
Os01g0575200	-2.70476	0.00357433	Helix-loop-helix DNA-binding domain containing protein. (Os01t0575200-01)
Os07g0684850	-2.70914	0.00396412	Conserved hypothetical protein. (Os07t0684850-01)
Os03g0850100	-2.71287	0.0190345	NLI interacting factor domain containing protein. (Os03t0850100-01)
Os01g0901300	-2.71858	0.0396291	Similar to VTC2-like protein. (Os01t0901300-01)
Os12g0154000	-2.71944	0.000880448	Protein of unknown function DUF250 domain containing protein. (Os12t0154000-01);Similar to integral membrane protein like. (Os12t0154000-02)
Os01g0112400	-2.72975	0.0256694	Major intrinsic protein family protein. (Os01t0112400-01)
Os03g0760900	-2.7315	0.0299066	Hypothetical conserved gene. (Os03t0760900-00)
Os01g0716450	-2.73625	0.0423848	Hypothetical gene. (Os01t0716450-00)
Os06g0651200	-2.73793	0.0103156	Conserved hypothetical protein. (Os06t0651200-01)
Os04g0420801	-2.73913	0.049559	Hypothetical protein. (Os04t0420801-00)
Os11g0514100	-2.74118	0.00501948	Hypothetical conserved gene. (Os11t0514100-00)
Os10g0524000	-2.74683	0.0427638	Conserved hypothetical protein. (Os10t0524000-01)
Os02g0472500	-2.75533	0.0268527	Similar to Pathogenesis-related protein PR1c. (Os02t0472500-00)
Os09g0448500	-2.76363	0.0340454	Conserved hypothetical protein. (Os09t0448500-00)
Os05g0320750	-2.77649	0.00129957	Hypothetical gene. (Os05t0320750-00)
Os02g0461900	-2.78058	0.00174337	Similar to actin associated protein. (Os02t0461900-01);Similar to Actin associated protein. (Os02t0461900-02)
Os04g0346800	-2.7853	0.00436731	Similar to OSIGBa0111I14.3 protein. (Os04t0346800-01);Similar to OSIGBa0111I14.3 protein. (Os04t0346800-02)
Os07g0683600	-2.79062	0.0048961	Similar to Osr40c1 protein. (Os07t0683600-00)
Os01g0118400	-2.79196	0.0207737	Similar to HGA6. (Os01t0118400-01)
Os01g0692050	-2.80114	0.0359386	Conserved hypothetical protein. (Os01t0692050-00)
Os01g0232100	-2.80526	0.0203077	Similar to Tonoplast membrane integral protein ZmTIP4-3. (Os01t0232100-01)
Os03g0376000	-2.82513	0.0274813	emp24/gp25L/p24 family protein. (Os03t0376000-01)
Os07g0601900	-2.82587	0.0461228	Similar to NADPH HC toxin reductase (Fragment). (Os07t0601900-01)
Os04g0128900	-2.82604	0.000694968	Flavin monooxygenase-like enzyme, Auxin biosynthesis (Os04t0128900-01)
Os03g0319000	-2.83442	0.0105403	Similar to VQ motif family protein, expressed. (Os03t0319000-01)
Os07g0613833	-2.83666	0.00747048	Hypothetical gene. (Os07t0613833-00)
Os02g0324400	-2.8429	0.0459275	Secreted protein with a CLE domain, Maintenance of the floral meristem (FM) and the vegetative shoot apical meristem (SAM) (Os02t0324400-01)
Os03g0846900	-2.84323	0.033397	Conserved hypothetical protein. (Os03t0846900-01)
Os11g0249000	-2.84501	0.000150589	NB-ARC domain containing protein. (Os11t0249000-01)
Os07g0559700	-2.87442	0.00118014	Similar to Monosaccharide transporter 3. (Os07t0559700-00)
Os03g0809200	-2.87608	0.0100648	Similar to Transcription factor EmBP-1 (Fragment). (Os03t0809200-01)
Os10g0491400	-2.87915	0.0408778	Conserved hypothetical protein. (Os10t0491400-01)
Os03g0159600	-2.88407	0.0451737	Similar to Rab28 protein. (Os03t0159600-01)
Os03g0417833	-2.8888	0.0434978	Hypothetical gene. (Os03t0417833-00)
Os05g0390800	-2.8906	0.0342664	Similar to VQ motif family protein. (Os05t0390800-00)
Os07g0546501	-2.89351	0.0199195	Hypothetical gene. (Os07t0546501-00)
Os12g0581350	-2.89463	0.0421326	Hypothetical gene. (Os12t0581350-00)
Os04g0445400	-2.89601	0.0164024	Similar to OSIGBa0140O07.6 protein. (Os04t0445400-01)
Os02g0484975	-2.91527	0.0382773	Conserved hypothetical protein. (Os02t0484975-00)
Os11g0114300	-2.91716	0.0325096	Conserved hypothetical protein. (Os11t0114300-01)
Os01g0206650	-2.91858	0.0381539	Hypothetical protein. (Os01t0206650-00)
Os03g0610400	-2.9316	0.00927481	Zinc finger, C2H2-like domain containing protein. (Os03t0610400-01)
Os03g0669600	-2.93638	0.0418216	Conserved hypothetical protein. (Os03t0669600-01);Conserved hypothetical protein. (Os03t0669600-02)
Os03g0312500	-2.93693	0.03422	Similar to SKIP interacting protein 23 (Fragment). (Os03t0312500-01);Similar to SKIP interacting protein 23 (Fragment). (Os03t0312500-02)
Os03g0183900	-2.94517	0.0487114	Similar to Plasma membrane H+-ATPase. (Os03t0183900-01)
Os01g0383900	-2.9473	0.0319791	Peptidase S59, nucleoporin family protein. (Os01t0383900-01);Peptidase S59, nucleoporin family protein. (Os01t0383900-02)
Os02g0641300	-2.95533	0.0204147	Hypothetical conserved gene. (Os02t0641300-00)
Os07g0694050	-2.95932	0.034151	Hypothetical gene. (Os07t0694050-00)
Os12g0111000	-2.97315	0.0197676	Conserved hypothetical protein. (Os12t0111000-01)
Os05g0341450	-2.97603	0.0191087	Conserved hypothetical protein. (Os05t0341450-01)
Os04g0303100	-2.9784	0.0179672	Similar to H0215E01.10 protein. (Os04t0303100-00)
Os10g0543400	-2.9823	0.0126127	Chitinase 8. (Os10t0543400-00)
Os07g0686900	-2.98267	0.0151165	Similar to Alpha-L-arabinofuranosidase C-terminus family protein, expressed. (Os07t0686900-01)
Os07g0520600	-2.98374	0.0196553	Conserved hypothetical protein. (Os07t0520600-01);Conserved hypothetical protein. (Os07t0520600-02)
Os03g0271900	-2.98389	0.00488676	Peptidase aspartic, catalytic domain containing protein. (Os03t0271900-01);Peptidase aspartic, catalytic domain containing protein. (Os03t0271900-02);Peptidase aspartic, catalytic domain containing protein. (Os03t0271900-03)
Os03g0722800	-2.98703	0.0488389	Similar to F-box domain containing protein. (Os03t0722800-01);Similar to F-box domain containing protein. (Os03t0722800-02)
Os02g0736700	-2.98741	0.0339043	Conserved hypothetical protein. (Os02t0736700-00)
Os01g0613800	-2.99628	0.00106094	Peptidase C1A, papain family protein. (Os01t0613800-01)
Os10g0534600	-2.9983	0.0217787	Hypothetical protein. (Os10t0534600-01)
Os05g0519700	-2.99929	0.00547668	Heat shock protein, Long-term acquired thermotolerance (Os05t0519700-01);Heat shock protein 101. (Os05t0519700-02);Similar to Heat shock protein 101. (Os05t0519700-03)
Os09g0274025	-2.99952	0.0258448	Hypothetical protein. (Os09t0274025-00)
Os10g0131000	-2.99962	0.0164807	Similar to NB-ARC domain containing protein, expressed. (Os10t0131000-00)
Os02g0211000	-3.00208	0.019319	Conserved hypothetical protein. (Os02t0211000-00)
Os05g0468500	-3.00381	0.0242859	Esterase, SGNH hydrolase-type domain containing protein. (Os05t0468500-01)
Os12g0140700	-3.00401	0.0392122	Zinc finger, RING/FYVE/PHD-type domain containing protein. (Os12t0140700-01)
Os02g0695900	-3.00543	0.0104332	Similar to oligopeptide transporter 4. (Os02t0695900-01)
Os03g0723400	-3.00936	0.0229913	Similar to UFG2. (Os03t0723400-01)
Os05g0478300	-3.03558	0.00155966	Hypothetical conserved gene. (Os05t0478300-01)
Os04g0513700	-3.03777	0.001288	Similar to Beta-glucosidase 16. (Os04t0513700-00)
Os01g0706700	-3.04925	0.00192527	Protein of unknown function DUF590 family protein. (Os01t0706700-01)
Os03g0712500	-3.05026	0.014236	Hypothetical protein. (Os03t0712500-00)
Os03g0839800	-3.05043	0.0218888	Protein of unknown function DUF688 domain containing protein. (Os03t0839800-01)
Os08g0234400	-3.05876	0.00530676	Hypothetical gene. (Os08t0234400-01)
Os02g0757800	-3.06116	0.0465446	Hypothetical protein. (Os02t0757800-01)
Os05g0577500	-3.06237	0.00746587	EF-Hand type domain containing protein. (Os05t0577500-01)
Os01g0174700	-3.06741	0.0199109	Similar to Akt (Fragment). (Os01t0174700-01);Similar to predicted protein. (Os01t0174700-03)
Os01g0757600	-3.07526	0.0478911	Similar to Myosin heavy chain-like protein (Fragment). (Os01t0757600-00)
Os04g0201000	-3.07627	0.0167699	Similar to OSIGBa0113K06.10 protein. (Os04t0201000-00)
Os07g0569550	-3.08283	0.0242755	Similar to protein kinase. (Os07t0569550-00)
Os06g0158100	-3.09313	0.0095021	Similar to WRKY transcription factor 63. (Os06t0158100-00)
Os01g0379400	-3.09601	0.0408745	Cyclin-like F-box domain containing protein. (Os01t0379400-01);Hypothetical conserved gene. (Os01t0379400-02);Cyclin-like F-box domain containing protein. (Os01t0379400-03)
Os10g0130900	-3.10066	0.0144635	Hypothetical protein. (Os10t0130900-00)
Os02g0129800	-3.10521	0.019149	Conserved hypothetical protein. (Os02t0129800-01)
Os02g0683100	-3.10925	0.0427594	Hypothetical protein. (Os02t0683100-00)
Os05g0122700	-3.10951	0.0148936	Similar to Low-temperature induced protein lt101.2. (Os05t0122700-01)
Os11g0181200	-3.11413	0.0316348	Hypothetical protein. (Os11t0181200-01)
Os10g0162854	-3.11803	0.0165414	Similar to OSIGBa0106P14.3 protein. (Os10t0162854-01)
Os08g0410950	-3.12998	0.00769773	Hypothetical conserved gene. (Os08t0410950-00)
Os02g0466050	-3.13405	0.0131609	Conserved hypothetical protein. (Os02t0466050-01)
Os10g0464500	-3.14205	0.00238929	Zinc finger, RING-type domain containing protein. (Os10t0464500-00)
Os07g0117400	-3.15336	0.0125584	NB-ARC domain containing protein. (Os07t0117400-01)
Os07g0643700	-3.15524	0.0427131	Alpha/beta hydrolase fold-3 domain containing protein. (Os07t0643700-01)
Os02g0282301	-3.15851	0.0249326	Conserved hypothetical protein. (Os02t0282301-01)
Os04g0110100	-3.17626	0.0246558	Concanavalin A-like lectin/glucanase domain containing protein. (Os04t0110100-01)
Os01g0770100	-3.1803	0.036855	O-acyltransferase, WSD1, N-terminal domain containing protein. (Os01t0770100-00)
Os12g0111700	-3.18547	0.0128757	Conserved hypothetical protein. (Os12t0111700-00)
Os07g0676600	-3.1935	0.0462529	Similar to DNA binding protein. (Os07t0676600-01)
Os06g0683100	-3.20025	0.023898	NAD(P)-binding domain containing protein. (Os06t0683100-01)
Os01g0778100	-3.20152	0.0074333	Hypothetical conserved gene. (Os01t0778100-01)
Os10g0491450	-3.20268	0.0118646	Conserved hypothetical protein. (Os10t0491450-00)
Os10g0476200	-3.20403	0.0065546	Similar to Casein kinase I (Fragment). (Os10t0476200-01);Hypothetical gene. (Os10t0476200-02)
Os08g0108700	-3.20788	0.040207	Glycolipid transfer protein domain domain containing protein. (Os08t0108700-00)
Os05g0576600	-3.21171	0.0210653	Conserved hypothetical protein. (Os05t0576600-01)
Os12g0228400	-3.21824	0.00363626	Similar to cDNA clone:J033003J10, full insert sequence. (Os12t0228400-01);Similar to cDNA clone:J033003J10, full insert sequence. (Os12t0228400-02)
Os09g0109600	-3.22396	0.0180916	Conserved hypothetical protein. (Os09t0109600-01)
Os08g0450100	-3.22606	0.0342627	Similar to Pectinesterase (EC 3.1.1.11) (Fragment). (Os08t0450100-01)
Os05g0512600	-3.22897	0.0266774	X8 domain containing protein. (Os05t0512600-01)
Os07g0564200	-3.23968	0.0115471	Conserved hypothetical protein. (Os07t0564200-01)
Os06g0725800	-3.25562	0.0117885	Hypothetical conserved gene. (Os06t0725800-00)
Os03g0264800	-3.25658	0.0324138	Similar to ATPase, AAA family protein, expressed. (Os03t0264800-00)
Os07g0570550	-3.26986	3.44e-06	Cupredoxin domain containing protein. (Os07t0570550-00)
Os09g0572301	-3.27179	0.0075128	Hypothetical conserved gene. (Os09t0572301-00)
Os04g0673700	-3.2777	0.021842	Hypothetical protein. (Os04t0673700-01);Hypothetical protein. (Os04t0673700-02)
Os10g0369900	-3.29095	0.0150896	Similar to Myo-inositol-1-phosphate synthase. (Os10t0369900-01)
Os08g0528200	-3.29259	0.00519928	Conserved hypothetical protein. (Os08t0528200-01)
Os12g0574800	-3.2998	0.0497662	Conserved hypothetical protein. (Os12t0574800-02);Bromodomain transcription factor domain containing protein. (Os12t0574800-03)
Os01g0263600	-3.30429	0.020185	U5 snRNP-associated 102 kDa protein (U5-102 kDa protein). (Os01t0263600-01);Similar to U5 snRNP-associated 102 kDa protein (U5-102 kDa protein). (Os01t0263600-02)
Os10g0571600	-3.30514	0.0358719	No apical meristem (NAM) protein domain containing protein. (Os10t0571600-01)
Os07g0570575	-3.30873	0.00782569	Hypothetical protein. (Os07t0570575-00)
Os06g0113900	-3.31474	0.0383346	Major facilitator superfamily, general substrate transporter domain containing protein. (Os06t0113900-01);Major facilitator superfamily, general substrate transporter domain containing protein. (Os06t0113900-02);Major facilitator superfamily, general substrate transporter domain containing protein. (Os06t0113900-03);Similar to cDNA clone:J033107D23, full insert sequence. (Os06t0113900-04);Similar…
Os04g0543000	-3.32006	0.0137849	Similar to Protein kinase. (Os04t0543000-01)
Os07g0119400	-3.34025	0.017834	Similar to Pectinesterase like protein. (Os07t0119400-01)
Os02g0807800	-3.34106	0.0249191	Hypothetical conserved gene. (Os02t0807800-01)
Os03g0761500	-3.36767	0.000583355	Similar to Subtilisin-like protease (Fragment). (Os03t0761500-01);Similar to Subtilisin-like protease (Fragment). (Os03t0761500-02)
Os11g0552500	-3.36844	0.0107058	Conserved hypothetical protein. (Os11t0552500-00)
Os09g0272200	-3.37127	0.00438712	Hypothetical protein. (Os09t0272200-01);Hypothetical conserved gene. (Os09t0272200-02)
Os06g0490200	-3.3713	0.0285873	Conserved hypothetical protein. (Os06t0490200-01);Conserved hypothetical protein. (Os06t0490200-02);Conserved hypothetical protein. (Os06t0490200-03)
Os10g0161400	-3.37306	0.000151334	NB-ARC domain containing protein. (Os10t0161400-01)
Os11g0515000	-3.39033	0.00892594	Armadillo-like helical domain containing protein. (Os11t0515000-00)
Os03g0119800	-3.39509	0.0206732	Conserved hypothetical protein. (Os03t0119800-01)
Os06g0319366	-3.40003	0.00607825	Hypothetical genes. (Os06t0319366-00)
Os06g0218600	-3.40595	0.00370274	Cupredoxin domain containing protein. (Os06t0218600-01)
Os12g0120400	-3.40694	0.000592019	Similar to ATPase-like protein. (Os12t0120400-01)
Os06g0560000	-3.41962	0.0458041	Ferroportin1 family protein. (Os06t0560000-01);Ferroportin1 family protein. (Os06t0560000-02)
Os01g0147400	-3.42834	0.0268538	Uncharacterised domain XH domain containing protein. (Os01t0147400-00)
Os02g0740600	-3.42957	0.00112774	Conserved hypothetical protein. (Os02t0740600-01)
Os07g0656600	-3.43104	0.02416	Uncharacterised conserved protein UCP022348 domain containing protein. (Os07t0656600-01)
Os03g0786250	-3.43205	0.0191671	Hypothetical gene. (Os03t0786250-00)
Os01g0656250	-3.43542	0.0374182	Hypothetical gene. (Os01t0656250-00)
Os07g0557400	-3.44417	0.000592343	Delayed-early response protein/equilibrative nucleoside transporter family protein. (Os07t0557400-01)
Os04g0310400	-3.45629	0.0463164	Similar to H0211A12.15 protein. (Os04t0310400-00)
Os05g0137200	-3.47294	0.0387548	Similar to P-glycoprotein ABCB5. (Os05t0137200-01);Similar to MDR-like ABC transporter. (Os05t0137200-02);Similar to MDR-like ABC transporter. (Os05t0137200-03);Non-protein coding transcript. (Os05t0137200-04)
Os01g0721400	-3.47325	0.0141701	NB-ARC domain containing protein. (Os01t0721400-01)
Os08g0247700	-3.48503	0.0025508	Protein kinase, catalytic domain domain containing protein. (Os08t0247700-00)
Os07g0534100	-3.48912	0.00377202	Protein kinase, catalytic domain domain containing protein. (Os07t0534100-00)
Os04g0476650	-3.49015	0.0252374	Hypothetical gene. (Os04t0476650-01)
Os05g0438500	-3.49414	0.0360055	Similar to Soluble inorganic pyrophosphatase (EC 3.6.1.1) (Pyrophosphate phospho- hydrolase) (PPase). (Os05t0438500-01)
Os12g0427600	-3.5085	0.0276708	Similar to Subtilase. (Os12t0427600-01)
Os09g0544000	-3.51369	0.0419806	Transferase family protein. (Os09t0544000-01)
Os01g0625900	-3.52503	0.00182329	Ovate Family Protein, Hormonal homeostasis, Vasculature development (Os01t0625900-01)
Os05g0414400	-3.53107	0.0310842	Domain of unknown function DUF659 domain containing protein. (Os05t0414400-01);Domain of unknown function DUF659 domain containing protein. (Os05t0414400-02)
Os01g0930900	-3.54054	0.015972	Similar to Short chain alcohol dehydrogenase-like. (Os01t0930900-00)
Os07g0663300	-3.54186	0.0382133	Similar to RNA-binding protein BRUNOL5 (Fragment). (Os07t0663300-01);Hypothetical conserved gene. (Os07t0663300-02)
Os11g0120725	-3.5419	0.00418927	Similar to ATPase-like protein. (Os11t0120725-00)
Os11g0154900	-3.54245	0.0135019	Similar to DNA-binding factor of bZIP class (Fragment). (Os11t0154900-01)
Os06g0711900	-3.54695	0.0183537	Bifunctional inhibitor/plant lipid transfer protein/seed storage domain containing protein. (Os06t0711900-01)
Os08g0106501	-3.55	0.0198809	Protein of unknown function DUF679 family protein. (Os08t0106501-01)
Os09g0482550	-3.56255	0.0194839	Late embryogenesis abundant protein, LEA-18 domain containing protein. (Os09t0482550-01)
Os09g0482300	-3.56256	0.0194839	Late embryogenesis abundant protein, LEA-18 domain containing protein. (Os09t0482300-01)
Os01g0591250	-3.57003	0.0086272	Hypothetical protein. (Os01t0591250-00)
Os04g0514600	-3.57393	0.00922924	Similar to NBS-LRR type disease resistance protein O2 (Fragment). (Os04t0514600-00)
Os08g0421800	-3.57825	0.018364	Similar to Mitogen-activated protein kinase kinase kinase 1 (EC 2.7.1.-) (Arabidospsis NPK1-related protein kinase 1). Splice isoform 1S. (Os08t0421800-01)
Os04g0619800	-3.58513	0.00450161	Similar to H0714H04.3 protein. (Os04t0619800-00)
Os02g0822450	-3.58921	0.0339859	Conserved hypothetical protein. (Os02t0822450-00)
Os03g0221200	-3.59554	0.00344733	Similar to Homocysteine S-methyltransferase 1 (EC 2.1.1.10) (S- methylmethionine:homocysteine methyltransferase 1) (SMM:Hcy S- methyltransferase 1) (ZmHMT-1). (Os03t0221200-01)
Os02g0737401	-3.59745	0.0264935	Hypothetical conserved gene. (Os02t0737401-01)
Os02g0318100	-3.60198	0.0303725	Similar to Alternative oxidase. (Os02t0318100-00)
Os05g0223300	-3.60386	0.00336196	Similar to RNA-binding protein. (Os05t0223300-01)
Os03g0602500	-3.63239	0.0284438	Similar to Dihydropterin pyrophosphokinase /dihydropteroate synthase precursor (EC 2.5.1.15). (Os03t0602500-01)
Os07g0410300	-3.67612	0.0365275	Conserved hypothetical protein. (Os07t0410300-01)
Os05g0135450	-3.6791	0.0287558	Hypothetical protein. (Os05t0135450-00)
Os07g0545100	-3.67962	0.00295982	Protein of unknown function DUF1218 family protein. (Os07t0545100-01)
Os05g0573200	-3.68144	0.0111426	Similar to Isocitrate dehydrogenase (Fragment). (Os05t0573200-00)
Os02g0581400	-3.68167	0.0293372	Conserved hypothetical protein. (Os02t0581400-01);Conserved hypothetical protein. (Os02t0581400-02)
Os03g0773600	-3.69003	0.0119159	Kinesin, motor region domain containing protein. (Os03t0773600-01);Hypothetical conserved gene. (Os03t0773600-02)
Os09g0426100	-3.69405	0.0352444	Similar to cDNA, clone: J075189B12, full insert sequence. (Os09t0426100-01);Similar to cDNA, clone: J075189B12, full insert sequence. (Os09t0426100-02)
Os10g0444100	-3.70628	0.0220851	Homeodomain-like containing protein. (Os10t0444100-01)
Os03g0305950	-3.70867	0.0490509	Similar to Xyloglucan 6-xylosyltransferase (EC 2.4.2.39) (AtXT1). (Os03t0305950-01)
Os12g0530100	-3.7108	0.0223688	Similar to Peroxidase 24 precursor (EC 1.11.1.7) (Atperox P24) (ATP47). (Os12t0530100-01)
Os06g0557200	-3.71404	0.0058848	Hypothetical protein. (Os06t0557200-01)
Os09g0425300	-3.72231	0.010145	Conserved hypothetical protein. (Os09t0425300-00)
Os10g0465950	-3.7232	0.0106174	Hypothetical conserved gene. (Os10t0465950-00)
Os09g0572500	-3.72399	0.0106663	Similar to Beta-1,4-mannan synthase. (Os09t0572500-01)
Os01g0925300	-3.7354	0.0227055	Zinc finger, DHHC-type domain containing protein. (Os01t0925300-01)
Os12g0236100	-3.746	0.00551233	Hypothetical conserved gene. (Os12t0236100-00)
Os05g0337200	-3.74609	0.0142655	Helix-loop-helix DNA-binding domain containing protein. (Os05t0337200-01)
Os09g0491100	-3.75225	0.0230287	Similar to Beta-primeverosidase (EC 3.2.1.149). (Os09t0491100-01);Similar to Beta-glucosidase isozyme 2. (Os09t0491100-02);Similar to Beta-glucosidase 30. (Os09t0491100-03)
Os12g0514300	-3.7573	0.0221003	Similar to UPF0497 membrane protein 9. (Os12t0514300-01);Uncharacterised protein family UPF0497, trans-membrane plant domain containing protein. (Os12t0514300-02)
Os04g0176400	-3.76552	0.00531956	Similar to serine carboxypeptidase 1. (Os04t0176400-00)
Os06g0110200	-3.77876	0.0243783	Late embryogenesis abundant (LEA) group 1 family protein. (Os06t0110200-01)
Os11g0541200	-3.77948	0.00486021	Protein of unknown function DUF247, plant domain containing protein. (Os11t0541200-00)
Os08g0240500	-3.78761	0.014236	Glycoside hydrolase, family 16 domain containing protein. (Os08t0240500-00)
Os12g0264650	-3.79249	0.0147786	Hypothetical conserved gene. (Os12t0264650-00)
Os07g0211101	-3.79452	0.00673187	Hypothetical conserved gene. (Os07t0211101-00)
Os01g0147800	-3.79792	0.00640039	Domain of unknown function DUF547 domain containing protein. (Os01t0147800-01)
Os06g0699301	-3.80129	0.00308501	Hypothetical conserved gene. (Os06t0699301-00)
Os03g0188200	-3.80244	0.00662255	Zinc finger, RING/FYVE/PHD-type domain containing protein. (Os03t0188200-01)
Os04g0406600	-3.81013	0.0492961	Prephenate dehydratase domain containing protein. (Os04t0406600-01)
Os04g0453300	-3.81997	0.0325026	Similar to H0505F09.5 protein. (Os04t0453300-00)
Os01g0621600	-3.82105	0.00411752	Serine/threonine protein kinase-related domain containing protein. (Os01t0621600-01)
Os06g0481200	-3.82144	0.0461118	Hypothetical protein. (Os06t0481200-00)
Os07g0132300	-3.83902	0.00491415	Conserved hypothetical protein. (Os07t0132300-01)
Os06g0627500	-3.85236	0.0281415	Leucine-rich repeat, plant specific containing protein. (Os06t0627500-01)
Os08g0414500	-3.8593	0.0180872	Hypothetical conserved gene. (Os08t0414500-00)
Os07g0134101	-3.86051	0.00218638	Hypothetical protein. (Os07t0134101-00)
Os06g0635250	-3.86332	0.00552664	Hypothetical protein. (Os06t0635250-00)
Os07g0229700	-3.86383	0.00540585	Similar to DNA-directed RNA polymerase I subunit 12 (EC 2.7.7.6) (Nuclear RNA polymerase I small specific subunit Rpa12) (Zinc ribbon domain containing protein 1). (Os07t0229700-01)
Os12g0518200	-3.87494	0.0264137	Similar to Integral membrane protein DUF6 containing protein. (Os12t0518200-01)
Os01g0869750	-3.87767	0.00510145	Conserved hypothetical protein. (Os01t0869750-01)
Os01g0852800	-3.87772	0.00510145	Conserved hypothetical protein. (Os01t0852800-01)
Os03g0295600	-3.87856	0.00967203	Serine/threonine protein kinase domain containing protein. (Os03t0295600-01);Serine/threonine protein kinase domain containing protein. (Os03t0295600-02)
Os01g0155200	-3.88951	0.00267788	Similar to H0525E10.8 protein. (Os01t0155200-00)
Os05g0587000	-3.8981	0.0234917	Pectin lyase fold/virulence factor domain containing protein. (Os05t0587000-01)
Os01g0601000	-3.90712	0.0110244	Mg2+ transporter protein, CorA-like/Zinc transport protein ZntB domain containing protein. (Os01t0601000-00)
Os01g0371300	-3.91659	0.0243454	Hypothetical protein. (Os01t0371300-00)
Os01g0847300	-3.92287	0.0158219	Uncharacterised protein family UPF0497, trans-membrane plant domain containing protein. (Os01t0847300-01);Uncharacterised protein family UPF0497, trans-membrane plant domain containing protein. (Os01t0847300-02)
Os06g0708050	-3.93432	0.010292	Hypothetical gene. (Os06t0708050-00)
Os10g0474000	-3.94299	0.00872976	Peptidase C48, SUMO/Sentrin/Ubl1 domain containing protein. (Os10t0474000-00)
Os11g0691700	-3.94303	0.00333769	Hypothetical protein. (Os11t0691700-01)
Os07g0588600	-3.9521	0.0408778	Zinc finger, C2H2-type domain containing protein. (Os07t0588600-01)
Os12g0283400	-3.97954	0.0105142	Pectinesterase inhibitor domain containing protein. (Os12t0283400-01)
Os11g0514900	-3.98195	0.0212933	Hypothetical conserved gene. (Os11t0514900-01)
Os08g0562866	-3.98406	0.0062274	Hypothetical protein. (Os08t0562866-00)
Os09g0320201	-3.98875	0.0103941	Hypothetical protein. (Os09t0320201-00)
Os05g0586400	-3.99625	0.0165864	Protein of unknown function DUF3133 domain containing protein. (Os05t0586400-01)
Os01g0945100	-3.99795	0.00690521	Similar to amino acid transporter. (Os01t0945100-00)
Os03g0197175	-4.00697	0.00972284	Hypothetical gene. (Os03t0197175-00)
Os07g0643500	-4.03571	0.0280982	Hypothetical protein. (Os07t0643500-01)
Os07g0570600	-4.04564	0.00186874	Cupredoxin domain containing protein. (Os07t0570600-01)
Os08g0548000	-4.04711	0.00618109	Myb transcription factor domain containing protein. (Os08t0548000-01)
Os02g0433900	-4.06833	0.00653474	Conserved hypothetical protein. (Os02t0433900-01)
Os07g0131375	-4.07413	0.0194839	Protein kinase, catalytic domain domain containing protein. (Os07t0131375-00)
Os05g0578600	-4.0801	0.0382981	Similar to Polygalacturonase PG2. (Os05t0578600-01)
Os02g0138000	-4.08424	0.029415	Leucine-rich repeat, plant specific containing protein. (Os02t0138000-00)
Os08g0498600	-4.08742	0.0274401	Similar to Caffeoyl-CoA 3-O-methyltransferase (Fragment). (Os08t0498600-01);Similar to Caffeoyl-CoA 3-O-methyltransferase (Fragment). (Os08t0498600-02)
Os07g0694400	-4.10423	0.043938	Glycosyl transferase, family 43 protein. (Os07t0694400-01)
Os01g0219300	-4.10558	0.004977	Conserved hypothetical protein. (Os01t0219300-01)
Os06g0192950	-4.10808	0.0180427	Hypothetical protein. (Os06t0192950-00)
Os02g0138900	-4.11886	0.00480155	Similar to ATCAX5; calcium:cation antiporter/ cation:cation antiporter. (Os02t0138900-01)
Os10g0110425	-4.12484	0.0437757	Hypothetical protein. (Os10t0110425-00)
Os05g0149000	-4.12913	0.00331174	Pectinesterase inhibitor domain containing protein. (Os05t0149000-01)
Os02g0303200	-4.12989	0.0127322	Hypothetical protein. (Os02t0303200-01)
Os05g0541100	-4.13569	0.00902061	IQ calmodulin-binding region domain containing protein. (Os05t0541100-01)
Os03g0259100	-4.14438	0.00423726	Similar to Basic blue protein (Cusacyanin) (Plantacyanin) (CBP). (Os03t0259100-01)
Os09g0425400	-4.14543	0.0154533	Hypothetical protein. (Os09t0425400-00)
Os08g0299300	-4.15234	0.00170529	Conserved hypothetical protein. (Os08t0299300-01)
Os11g0432600	-4.15296	0.00367398	Similar to Beta-keto acyl reductase (Fragment). (Os11t0432600-01)
Os08g0421100	-4.17878	0.0295008	Similar to Cyclin-D1-2. (Os08t0421100-00)
Os10g0200000	-4.18402	0.00239482	Protein kinase, core domain containing protein. (Os10t0200000-01);Similar to Protein kinase domain containing protein, expressed. (Os10t0200000-02)
Os10g0470801	-4.18524	0.0247606	Hypothetical gene. (Os10t0470801-00)
Os11g0456050	-4.20311	0.00677588	Hypothetical gene. (Os11t0456050-00)
Os03g0306700	-4.21863	0.0162096	Conserved hypothetical protein. (Os03t0306700-01)
Os11g0564800	-4.22662	0.000501477	Hypothetical protein. (Os11t0564800-01)
Os06g0730150	-4.23531	0.00258289	Hypothetical protein. (Os06t0730150-00)
Os08g0531100	-4.23824	0.00650218	MAP65/ASE1 family protein. (Os08t0531100-01)
Os11g0236932	-4.23865	0.00774144	Hypothetical conserved gene. (Os11t0236932-01)
Os07g0209201	-4.25667	0.0121753	Hypothetical protein. (Os07t0209201-00)
Os11g0540800	-4.26576	0.00323833	Protein of unknown function DUF247, plant domain containing protein. (Os11t0540800-00)
Os04g0569100	-4.27978	0.00246436	Similar to OCL1 homeobox protein. (Os04t0569100-01)
Os01g0139900	-4.28332	0.00165694	Conserved hypothetical protein. (Os01t0139900-01)
Os11g0708100	-4.28444	0.023643	Similar to Laccase-22. (Os11t0708100-01)
Os01g0890300	-4.28951	0.0162601	Conserved hypothetical protein. (Os01t0890300-01)
Os06g0665000	-4.29077	0.0423801	Protein of unknown function DUF284, transmembrane eukaryotic family protein. (Os06t0665000-01);Protein of unknown function DUF284, transmembrane eukaryotic family protein. (Os06t0665000-02)
Os01g0256300	-4.29398	0.000728583	Conserved hypothetical protein. (Os01t0256300-00)
Os10g0361876	-4.30591	0.000109545	Conserved hypothetical protein. (Os10t0361876-01)
Os07g0496250	-4.32532	0.00116259	Similar to Expansin-like B1. (Os07t0496250-01)
Os05g0325000	-4.32666	0.00848256	Similar to OSIGBa0140J09.3 protein. (Os05t0325000-00)
Os04g0522500	-4.33259	0.032748	2OG-Fe(II) oxygenase domain containing protein. (Os04t0522500-01)
Os03g0803500	-4.35383	0.00187528	Similar to Prolyl 4-hydroxylase alpha-1 subunit-like protein. (Os03t0803500-01)
Os02g0499300	-4.35542	0.00331529	Hypothetical protein. (Os02t0499300-01)
Os11g0151800	-4.36842	0.029244	Similar to ATPAP18/PAP18. (Os11t0151800-01)
Os02g0329450	-4.37514	0.0103691	Hypothetical protein. (Os02t0329450-00)
Os01g0745700	-4.37822	0.00424657	Similar to GATA transcription factor 3 (AtGATA-3). (Os01t0745700-01);Hypothetical conserved gene. (Os01t0745700-02)
Os09g0432300	-4.38782	0.0153312	Similar to AAA-type ATPase family protein. (Os09t0432300-01)
Os02g0294100	-4.39288	0.00215998	Cyclin-like F-box domain containing protein. (Os02t0294100-01);Cyclin-like F-box domain containing protein. (Os02t0294100-02)
Os03g0760800	-4.39569	0.0171432	A member of the GAST (gibberellin (GA)-Stimulated Transcript) family, Control of seedling growth and &alpha;-amylase expression, Cell proliferation in meristems and panicles development (Os03t0760800-01)
Os11g0595400	-4.40218	0.000991578	Small secreted protein containing CLE domain, Regulation of meristem maintenance (Os11t0595400-01)
Os01g0226400	-4.41215	0.0128174	ATPase, AAA-type, core domain containing protein. (Os01t0226400-01)
Os04g0661300	-4.41951	0.0346316	Similar to H0112G12.10 protein. (Os04t0661300-01);Similar to H0112G12.10 protein. (Os04t0661300-02)
Os04g0185600	-4.42109	0.0198553	General substrate transporter domain containing protein. (Os04t0185600-00)
Os08g0110600	-4.43395	0.00285379	Protein of unknown function DUF1442 domain containing protein. (Os08t0110600-00)
Os04g0565200	-4.44142	0.0474195	Similar to Cis-zeatin O-glucosyltransferase 1 (EC 2.4.1.215) (cisZOG1). (Os04t0565200-01)
Os11g0490600	-4.44351	0.018816	Regulation of shoot gravitropism and tiller angle, Regulation of polar auxin transport (Os11t0490600-01);Hypothetical conserved gene. (Os11t0490600-02)
Os10g0580400	-4.44433	0.010052	High-affinity urea transporter, Effective urea acquisition and utilisation, Effective use of low external urea as a N source (Os10t0580400-01)
Os04g0394250	-4.44889	0.0202247	Hypothetical gene. (Os04t0394250-00)
Os10g0521550	-4.45452	0.0230287	Hypothetical protein. (Os10t0521550-00)
Os01g0734399	-4.46127	0.00325126	Hypothetical protein. (Os01t0734399-00)
Os08g0239000	-4.46169	0.00487363	Complex 1 LYR protein family protein. (Os08t0239000-01)
Os03g0782400	-4.49527	0.0125793	Conserved hypothetical protein. (Os03t0782400-00)
Os09g0491532	-4.50425	0.0095688	Similar to Squamosa-promoter binding protein 2. (Os09t0491532-01)
Os10g0497600	-4.51323	0.0342424	Serine/threonine protein kinase-related domain containing protein. (Os10t0497600-01);Serine/threonine protein kinase-related domain containing protein. (Os10t0497600-02)
Os08g0167800	-4.51712	0.0267734	Similar to Sesquiterpene synthase. (Os08t0167800-01)
Os10g0468600	-4.52598	0.0070348	Hypothetical protein. (Os10t0468600-01)
Os03g0148000	-4.53262	0.00764697	Protein of unknown function DUF677 family protein. (Os03t0148000-01)
Os07g0541600	-4.53496	0.0101591	Similar to cDNA clone:002-112-D06, full insert sequence. (Os07t0541600-01);Conserved hypothetical protein. (Os07t0541600-02)
Os12g0573800	-4.54316	0.0072096	Conserved hypothetical protein. (Os12t0573800-01)
Os07g0541700	-4.5433	0.00402092	Similar to receptor-like serine-threonine protein kinase. (Os07t0541700-01)
Os02g0594166	-4.54475	0.00354782	Conserved hypothetical protein. (Os02t0594166-01)
Os10g0465700	-4.55097	0.000665215	Similar to Beta-amylase PCT-BMYI (EC 3.2.1.2). (Os10t0465700-01)
Os09g0441700	-4.55463	0.0190675	Similar to flavonoid 3-monooxygenase. (Os09t0441700-00)
Os10g0505900	-4.56417	0.0156749	Conserved hypothetical protein. (Os10t0505900-01)
Os02g0156700	-4.56756	0.0213154	Hypothetical protein. (Os02t0156700-01)
Os03g0161100	-4.57004	0.000706771	Similar to Viral A-type inclusion protein repeat containing protein, expressed. (Os03t0161100-00)
Os06g0318500	-4.57772	0.0198338	Similar to Sodium/hydrogen exchanger. (Os06t0318500-00)
Os09g0471150	-4.583	0.0255749	Hypothetical gene. (Os09t0471150-00)
Os06g0273400	-4.59238	0.0292944	Hypothetical protein. (Os06t0273400-01)
Os05g0465800	-4.62815	0.0255322	Similar to RbohAp108. (Os05t0465800-01)
Os12g0471100	-4.63695	0.0239161	Similar to ATPase 2. (Os12t0471100-01)
Os10g0561900	-4.64145	0.0166008	Protein-tyrosine phosphatase, dual specificity domain containing protein. (Os10t0561900-01);Protein-tyrosine phosphatase, dual specificity domain containing protein. (Os10t0561900-02);Similar to Protein-tyrosine phosphatase mitochondrial 1. (Os10t0561900-03);Similar to Protein-tyrosine phosphatase mitochondrial 1. (Os10t0561900-04)
Os11g0534100	-4.65154	0.00798207	Hypothetical conserved gene. (Os11t0534100-00)
Os08g0444500	-4.66445	0.00612124	Conserved hypothetical protein. (Os08t0444500-00)
Os05g0424100	-4.66505	0.00701951	Hypothetical protein. (Os05t0424100-00)
Os10g0167600	-4.67711	0.045525	Splicing variant (Os10t0167600-01);Cyclobutane pyrimidine dimer (CPD) photolyase, Ultraviolet-B (UVB) resistance (Os10t0167600-02)
Os01g0944900	-4.71173	0.0351274	Similar to Glucan endo-1,3-beta-D-glucosidase. (Os01t0944900-01)
Os02g0561800	-4.75245	0.00367398	RING-H2 type E3 ubiquitin ligase, Root development, Maintenance of cell viability after the initiation of root primordial formation, Defense response (Os02t0561800-01)
Os02g0559800	-4.7525	0.00367398	RING-H2 type E3 ubiquitin ligase, Root development, Maintenance of cell viability after the initiation of root primordial formation, Defense response (Os02t0559800-01)
Os02g0561000	-4.75251	0.00367398	RING-H2 type E3 ubiquitin ligase, Root development, Maintenance of cell viability after the initiation of root primordial formation, Defense response (Os02t0561000-01)
Os02g0561400	-4.75253	0.00367398	RING-H2 type E3 ubiquitin ligase, Root development, Maintenance of cell viability after the initiation of root primordial formation, Defense response (Os02t0561400-01)
Os02g0560600	-4.75259	0.00367398	RING-H2 type E3 ubiquitin ligase, Root development, Maintenance of cell viability after the initiation of root primordial formation, Defense response (Os02t0560600-01)
Os02g0560200	-4.7526	0.00367398	RING-H2 type E3 ubiquitin ligase, Root development, Maintenance of cell viability after the initiation of root primordial formation, Defense response (Os02t0560200-01)
Os11g0440200	-4.75357	0.00132906	Similar to GDA1/CD39 family protein, expressed. (Os11t0440200-00)
Os06g0666800	-4.77179	0.00166868	Conserved hypothetical protein. (Os06t0666800-01)
Os10g0569600	-4.7725	0.0113533	Similar to RIR1b protein precursor. (Os10t0569600-00)
Os09g0375000	-4.77716	0.00269574	Enolase (EC 4.2.1.11) (Fragment). (Os09t0375000-01)
Os03g0770900	-4.78331	0.000953575	Conserved hypothetical protein. (Os03t0770900-01)
Os11g0147500	-4.78625	0.00552676	Heavy metal transport/detoxification protein domain containing protein. (Os11t0147500-01);Heavy metal transport/detoxification protein domain containing protein. (Os11t0147500-02)
Os08g0455900	-4.80112	0.00858226	Putative copper transporter 5.2. (Os08t0455900-00)
Os03g0640000	-4.80799	0.0274805	Patatin family protein. (Os03t0640000-00)
Os06g0537500	-4.84772	0.0301294	Zinc finger, RING-type domain containing protein. (Os06t0537500-00)
Os12g0626200	-4.86924	0.00575897	Auxin responsive SAUR protein family protein. (Os12t0626200-01)
Os02g0718600	-4.87385	0.00982758	Conserved hypothetical protein. (Os02t0718600-01)
Os07g0160050	-4.88362	0.0285095	Hypothetical protein. (Os07t0160050-00)
Os11g0112400	-4.90657	0.0143275	Peroxidase (EC 1.11.1.7). (Os11t0112400-01)
Os05g0202800	-4.90793	0.0306357	Similar to Metallothionein-like protein 3B. (Os05t0202800-00)
Os10g0578700	-4.95336	0.0145556	Hypothetical protein. (Os10t0578700-01)
Os06g0701700	-4.98822	0.021729	Ion transporter , Na+/K+ symport (Os06t0701700-01);Similar to Cation transporter HKT1. (Os06t0701700-02)
Os01g0200300	-4.99734	0.0302995	Similar to Homeobox-leucine zipper protein HOX29. (Os01t0200300-01)
Os02g0559300	-5.0013	0.00267767	Hypothetical conserved gene. (Os02t0559300-01);Serine/threonine protein kinase domain containing protein. (Os02t0559300-02)
Os11g0703600	-5.00903	0.00130974	Conserved hypothetical protein. (Os11t0703600-01);Conserved hypothetical protein. (Os11t0703600-02);Hypothetical conserved gene. (Os11t0703600-03)
Os01g0705200	-5.04561	0.0322086	Late embryogenesis abundant protein repeat containing protein. (Os01t0705200-01)
Os04g0439600	-5.05148	0.00563677	Regulator of chromosome condensation/beta-lactamase-inhibitor protein II domain containing protein. (Os04t0439600-01)
Os06g0190800	-5.05166	0.0251844	Similar to Glutamate receptor. (Os06t0190800-01);Similar to Glutamate receptor. (Os06t0190800-02)
Os07g0684900	-5.0582	0.00273713	WUSCHEL-related homeobox protein, Transcription factor, Crown root development (Os07t0684900-01)
Os05g0427400	-5.06115	0.0350343	Similar to Phenylalanine ammonia-lyase. (Os05t0427400-00)
Os02g0168500	-5.06302	0.015599	Similar to Protein-O-fucosyltransferase 1. (Os02t0168500-01);Similar to Protein-O-fucosyltransferase 1. (Os02t0168500-02)
Os03g0623100	-5.08433	0.0461228	Conserved hypothetical protein. (Os03t0623100-01)
Os02g0571100	-5.11929	0.00731645	Terpenoid synthase domain containing protein. (Os02t0571100-01)
Os01g0859100	-5.25944	0.00742839	Similar to WIP1 protein (Fragment). (Os01t0859100-01)
Os03g0300801	-5.26318	0.0374599	Similar to Transferase, transferring glycosyl groups. (Os03t0300801-00)
Os12g0121600	-5.29347	0.00196368	Cation/H+ exchanger domain containing protein. (Os12t0121600-01)
Os09g0424300	-5.31149	0.0102837	S-adenosylmethionine decarboxylase. (Os09t0424300-01);S-adenosylmethionine decarboxylase. (Os09t0424300-03)
Os03g0374500	-5.31921	0.00369568	Similar to calmodulin-binding family protein. (Os03t0374500-00)
Os02g0509600	-5.33605	0.00565556	Conserved hypothetical protein. (Os02t0509600-01)
Os01g0876400	-5.38043	0.00252738	Sad1/UNC-like, C-terminal domain containing protein. (Os01t0876400-01);Hypothetical conserved gene. (Os01t0876400-02);Hypothetical conserved gene. (Os01t0876400-03);Hypothetical conserved gene. (Os01t0876400-04)
Os04g0598600	-5.38756	6.04e-05	Protein kinase, catalytic domain domain containing protein. (Os04t0598600-00)
Os04g0641700	-5.39303	0.000773508	Similar to H0423H10.4 protein. (Os04t0641700-00)
Os10g0534500	-5.41536	0.0472484	Similar to Resistance protein candidate (Fragment). (Os10t0534500-01);Similar to Resistance protein candidate (Fragment). (Os10t0534500-02)
Os06g0722300	-5.42958	0.000437697	Similar to Class III homeodomain-leucine zipper protein. (Os06t0722300-01);Similar to CORONA. (Os06t0722300-02)
Os06g0722650	-5.4296	0.000437697	Similar to Class III homeodomain-leucine zipper protein. (Os06t0722650-01);Similar to CORONA. (Os06t0722650-02)
Os06g0720500	-5.4296	0.000437697	Similar to Class III homeodomain-leucine zipper protein. (Os06t0720500-01);Similar to CORONA. (Os06t0720500-02);Similar to CORONA. (Os06t0720500-03)
Os10g0467850	-5.48718	0.00400884	Hypothetical protein. (Os10t0467850-00)
Os01g0652100	-5.50297	0.00131744	Protein of unknown function DUF231, plant domain containing protein. (Os01t0652100-01)
Os03g0334300	-5.5192	0.0125396	Similar to predicted protein. (Os03t0334300-00)
Os08g0404000	-5.52582	0.00949977	UDP-glucuronosyl/UDP-glucosyltransferase domain containing protein. (Os08t0404000-00)
Os11g0171700	-5.54148	0.0012773	Forkhead-associated domain containing protein. (Os11t0171700-01);Hypothetical conserved gene. (Os11t0171700-02)
Os08g0465000	-5.57907	0.00247237	Hypothetical conserved gene. (Os08t0465000-00)
Os07g0184850	-5.59321	0.0143028	Similar to histone H1. (Os07t0184850-00)
Os03g0764900	-5.5942	0.000799919	Similar to Zn finger protein (Fragment). (Os03t0764900-01)
Os12g0112000	-5.61396	0.0242952	Similar to Peroxidase precursor (EC 1.11.1.7) (Fragment). (Os12t0112000-01)
Os04g0472200	-5.62299	0.00510177	Similar to H0418A01.11 protein. (Os04t0472200-01)
Os11g0592600	-5.66887	0.014796	Targeting for Xklp2 family protein. (Os11t0592600-01)
Os01g0895300	-5.70813	0.0152494	Cytochrome b561, eukaryote domain containing protein. (Os01t0895300-01)
Os07g0263400	-5.79997	0.000367194	Similar to oxidoreductase family protein. (Os07t0263400-00)
Os01g0200350	-5.81067	0.0188253	Hypothetical protein. (Os01t0200350-00)
Os05g0543600	-5.8155	0.00480898	Similar to Myb-related protein. (Os05t0543600-01)
Os09g0539000	-5.83217	0.0327813	Hypothetical conserved gene. (Os09t0539000-00)
Os02g0150900	-5.85019	0.0137387	Protein of unknown function DUF1644 family protein. (Os02t0150900-01);Protein of unknown function DUF1644 family protein. (Os02t0150900-02);Protein of unknown function DUF1644 family protein. (Os02t0150900-03)
Os06g0128300	-5.86656	0.00145539	Mitochondrial half ABC (ATP-binding cassette) transporter, Iron homeostasis, Meristem maintenance (Os06t0128300-01);Similar to STA1 (STARIK 1); ATPase, coupled to transmembrane movement of substances. (Os06t0128300-02);Similar to Mitochondrial half-ABC transporter. (Os06t0128300-03)
Os09g0482761	-5.89137	0.00834642	Conserved hypothetical protein. (Os09t0482761-00)
Os04g0630300	-5.94741	0.0425622	NAD(P)-binding domain containing protein. (Os04t0630300-01)
Os03g0644600	-5.96221	0.000582396	Protein of unknown function DUF761, plant domain containing protein. (Os03t0644600-00)
Os01g0127600	-5.97547	0.00718798	Similar to Bowman-Birk type proteinase inhibitor D-II precursor (IV). (Os01t0127600-01)
Os10g0553300	-5.98721	0.00959081	Similar to Trehalose-6-phosphate phosphatase. (Os10t0553300-01)
Os04g0639800	-5.99503	0.000583242	Similar to OSIGBa0138H21-OSIGBa0138E01.9 protein. (Os04t0639800-01)
Os01g0285300	-5.99871	0.00536594	Myb transcription factor domain containing protein. (Os01t0285300-01)
Os05g0135400	-6.02025	0.0146091	Plant peroxidase domain containing protein. (Os05t0135400-01)
Os08g0482500	-6.03018	0.0100677	Hypothetical protein. (Os08t0482500-01);Hypothetical protein. (Os08t0482500-02)
Os07g0604400	-6.0749	0.0428109	Similar to COBRA-like protein 6. (Os07t0604400-00)
Os02g0155700	-6.14587	0.0021474	Hypothetical conserved gene. (Os02t0155700-00)
Os07g0592000	-6.18867	0.0139675	Gibberellin regulated protein family protein. (Os07t0592000-01)
Os07g0531200	-6.22371	0.0056516	Conserved hypothetical protein. (Os07t0531200-01)
Os11g0454200	-6.26063	0.0226473	Dehydrin RAB 16B. (Os11t0454200-01)
Os02g0187600	-6.42513	0.00355853	Similar to Tic21. (Os02t0187600-01);Similar to Tic21. (Os02t0187600-02)
Os09g0482840	-6.50644	0.016313	EF hand domain containing protein. (Os09t0482840-01)
Os06g0246500	-6.52485	0.019513	Similar to Pyruvate dehydrogenase E1 alpha subunit (EC 1.2.4.1). (Os06t0246500-01)
Os01g0895200	-6.67102	0.0123652	DOMON related domain containing protein. (Os01t0895200-01)
Os05g0113500	-6.80776	0.0179976	Similar to BRI1-KD interacting protein 130. (Os05t0113500-03);Similar to BRI1-KD interacting protein 130. (Os05t0113500-04);Similar to BRI1-KD interacting protein 130. (Os05t0113500-05)
Os02g0776900	-6.82768	0.000503415	Transcription activator, Gibberellin (GA)-induced stem elongation (Os02t0776900-01);Similar to Growth-regulating factor 1. (Os02t0776900-02)
Os05g0349800	-6.93058	0.00360037	Embryonic abundant protein 1. (Os05t0349800-01);Similar to Embryonic abundant protein 1. (Os05t0349800-02)
Os02g0537000	-7.38964	0.0310545	Pectinesterase inhibitor domain containing protein. (Os02t0537000-01)
Os06g0731000	-8.04789	0.0114515	Conserved hypothetical protein. (Os06t0731000-00)
Os01g0611000	-8.21808	0.0186468	Protein of unknown function DUF642 domain containing protein. (Os01t0611000-01);Hypothetical conserved gene. (Os01t0611000-02)
Os02g0824500	-8.64906	0.00733854	Similar to Remorin. (Os02t0824500-01)
Os08g0442900	-10.2433	0.0494508	Hypothetical protein. (Os08t0442900-01)
Os02g0106100	-12.5239	0.0309159	Similar to Fructosyltransferase. (Os02t0106100-01)

## Sheet: Supplementary_table4
Supplementary_table 4 Differentially expressed genes detected only in Hwaseong under dark treatment
Gene	log2FC	Adjusted P-value	Description
Os08g0189600	9.12467	0.0317552	Germin-like protein 8-7, Disease resistance (Os08t0189600-01)
Os06g0264300	8.80795	0.000135269	Similar to RAD23, isoform I. (Os06t0264300-01);Similar to RAD23, isoform I. (Os06t0264300-02);Similar to DNA repair protein RAD23. (Os06t0264300-03)
Os08g0189200	8.7924	0.0270141	Germin-like protein 8-3, Disease resistance (Os08t0189200-01)
Os03g0265400	7.59007	0.0169827	Similar to 50S ribosomal protein L4, chloroplast precursor (R-protein L4). (Os03t0265400-01);Similar to 50S ribosomal protein L4, chloroplast precursor (R-protein L4). (Os03t0265400-02)
Os08g0377500	7.55566	0.0342562	Protein of unknown function DUF599 family protein. (Os08t0377500-01)
Os02g0288200	7.1347	0.0113406	Protein of unknown function DUF573 domain containing protein. (Os02t0288200-01);Hypothetical conserved gene. (Os02t0288200-02)
Os02g0600200	7.11225	0.00159877	IQ calmodulin-binding region domain containing protein. (Os02t0600200-01);Similar to predicted protein. (Os02t0600200-02)
Os02g0466400	6.89981	0.0361461	Similar to Inositol phosphate kinase. (Os02t0466400-01)
Os09g0416600	6.40193	0.00711567	Conserved hypothetical protein. (Os09t0416600-01);Protein of unknown function DUF868, plant family protein. (Os09t0416600-02)
Os09g0472700	6.12771	0.0265444	Similar to blight-associated protein p12. (Os09t0472700-00)
Os07g0677200	6.10103	0.0116405	Peroxidase. (Os07t0677200-01);Similar to Peroxidase. (Os07t0677200-02)
Os12g0618300	5.91702	0.0300774	Similar to GTP-binding protein-like (Fragment). (Os12t0618300-01);Similar to GTP binding protein. (Os12t0618300-02);Similar to GTP binding protein. (Os12t0618300-03)
Os06g0146600	5.87887	0.0432037	Hypothetical protein. (Os06t0146600-01)
Os11g0702501	5.82676	0.000116102	Hypothetical conserved gene. (Os11t0702501-00)
Os08g0174000	5.74306	0.0218118	Hypothetical protein. (Os08t0174000-01)
Os01g0946600	5.7282	0.0288286	Conserved hypothetical protein. (Os01t0946600-01)
Os06g0496800	5.69518	0.0300965	Similar to S-locus receptor kinase precursor. (Os06t0496800-01);Similar to S-locus receptor kinase precursor. (Os06t0496800-02)
Os12g0540900	5.66953	0.0312043	Similar to Tryptophanyl-tRNA synthetase (EC 6.1.1.2) (Tryptophan--tRNA ligase) (TrpRS). (Os12t0540900-01);Similar to tryptophanyl-tRNA synthetase. (Os12t0540900-02)
Os04g0578000	5.51971	0.0276474	ACC synthase, Ethylene biosynthesis (Os04t0578000-01)
Os10g0504900	5.40946	0.020069	Similar to Lipid transfer protein. (Os10t0504900-01)
Os12g0595800	5.26223	0.0114637	Similar to cDNA clone:J023098M23, full insert sequence. (Os12t0595800-01);Similar to Protein kinase domain containing protein, expressed. (Os12t0595800-02);Similar to cDNA clone:J023098M23, full insert sequence. (Os12t0595800-03);Protein kinase, core domain containing protein. (Os12t0595800-04)
Os12g0192500	5.18586	0.0125389	Similar to Phosphomethylpyrimidine kinase/thiamin-phosphate pyrophosphorylase. (Os12t0192500-01);Phosphomethylpyrimidine kinase type-1 domain containing protein. (Os12t0192500-02);Similar to Phosphomethylpyrimidine kinase/thiamin-phosphate pyrophosphorylase. (Os12t0192500-03)
Os03g0235000	5.17563	0.0356286	Similar to Peroxidase. (Os03t0235000-01)
Os11g0255300	5.10742	9.01e-05	Cysteine endopeptidase (Cysteine proteinase (EC 3.4.22.-)-rice). (Os11t0255300-01)
Os07g0551501	5.10234	0.0174593	Hypothetical protein. (Os07t0551501-00)
Os01g0812000	5.05894	0.0205566	Transcriptional activator of gibberellin-dependent alpha-amylase expression, Regulation of nutrient mobilization in germination (Os01t0812000-01);Myb-like transcription factor, Induction of alpha-amylase in aleurone, Pollen development (Os01t0812000-02);Similar to cDNA clone:J033109N02, full insert sequence. (Os01t0812000-03)
Os12g0110150	5.03869	0.00829495	Hypothetical gene. (Os12t0110150-00)
Os04g0664900	4.94636	0.0125823	Similar to H1005F08.5 protein. (Os04t0664900-01)
Os04g0654400	4.93563	0.015215	Eggshell protein family protein. (Os04t0654400-01)
Os09g0530350	4.887	0.00201642	Hypothetical protein. (Os09t0530350-00)
Os01g0627900	4.84246	0.0128894	Similar to Cytochrome P450. (Os01t0627900-01)
Os08g0494300	4.83592	0.00549726	Copine domain containing protein. (Os08t0494300-01)
Os02g0482400	4.83003	0.0258924	Similar to Ornithine decarboxylase (EC 4.1.1.17) (ODC). (Os02t0482400-01)
Os04g0670200	4.78482	0.0300983	Similar to Oryzain beta chain precursor (EC 3.4.22.-). (Os04t0670200-01);Granulin domain containing protein. (Os04t0670200-02)
Os04g0470901	4.64949	0.0495979	Hypothetical gene. (Os04t0470901-00)
Os12g0105600	4.64352	0.00968308	Similar to Phosphate starvation regulator protein (Regulatory protein of P- starvation acclimation response Psr1). (Os12t0105600-01)
Os10g0344900	4.63255	0.00607337	Multi antimicrobial extrusion protein MatE family protein. (Os10t0344900-01)
Os07g0188700	4.59841	0.00652792	Similar to EXO. (Os07t0188700-01);Similar to oxidoreductase. (Os07t0188700-02);Hypothetical conserved gene. (Os07t0188700-03)
Os03g0346700	4.55323	0.0440951	Similar to JmjC domain containing protein, expressed. (Os03t0346700-01);Similar to JmjC domain containing protein, expressed. (Os03t0346700-02)
Os08g0189850	4.53499	0.0364406	Germin-like protein 8-9, Disease resistance (Os08t0189850-01)
Os05g0244700	4.48416	0.00651441	Aminotransferase, class IV family protein. (Os05t0244700-01);Aminotransferase, class IV family protein. (Os05t0244700-02)
Os05g0370700	4.4425	0.036897	Alpha/beta hydrolase family protein. (Os05t0370700-01)
Os12g0130100	4.35978	0.00233402	Similar to D-mannose binding lectin family protein, expressed. (Os12t0130100-01)
Os11g0294600	4.32146	0.0241954	Zinc finger, RING/FYVE/PHD-type domain containing protein. (Os11t0294600-01);Zinc finger, RING/FYVE/PHD-type domain containing protein. (Os11t0294600-02)
Os11g0229500	4.26478	0.00087228	Similar to NBS-LRR protein (Fragment). (Os11t0229500-01)
Os02g0266200	4.18794	0.0412831	Pentatricopeptide repeat domain containing protein. (Os02t0266200-01);Pentatricopeptide repeat domain containing protein. (Os02t0266200-02)
Os02g0555200	4.13344	0.00472249	Conserved hypothetical protein. (Os02t0555200-01)
Os02g0562600	4.12808	0.0263474	Similar to Seven trans-membrane protein (Fragment). (Os02t0562600-01)
Os07g0130800	4.11628	0.0206418	Protein kinase, catalytic domain domain containing protein. (Os07t0130800-01)
Os02g0530300	4.11572	0.028054	Zinc finger, AN1-type domain containing protein. (Os02t0530300-01)
Os09g0493000	4.11088	0.00621638	Conserved hypothetical protein. (Os09t0493000-01)
Os04g0677400	4.07834	0.00339535	Protein of unknown function DUF639 family protein. (Os04t0677400-02)
Os11g0228201	4.06457	0.00380239	Hypothetical gene. (Os11t0228201-01)
Os10g0550775	4.05793	0.00548824	Conserved hypothetical protein. (Os10t0550775-00)
Os08g0412800	4.036	0.0357052	Protein of unknown function DUF1262 family protein. (Os08t0412800-01)
Os08g0186200	4.03569	0.00863648	Hypothetical conserved gene. (Os08t0186200-00)
Os11g0593000	4.03304	0.00617849	Phosphoesterase family protein. (Os11t0593000-01)
Os09g0124850	4.03149	0.00388532	Conserved hypothetical protein. (Os09t0124850-00)
Os11g0126900	4.02551	0.0479869	NAC-domain protein, Drought tolerance (Os11t0126900-01)
Os11g0623700	3.97995	2.5e-06	Conserved hypothetical protein. (Os11t0623700-01)
Os08g0203201	3.97957	0.0272914	Similar to SHR5-receptor-like kinase (Fragment). (Os08t0203201-00)
Os09g0563700	3.97708	0.002601	Kelch related domain containing protein. (Os09t0563700-01)
Os06g0579100	3.95313	0.0146603	Conserved hypothetical protein. (Os06t0579100-01)
Os07g0591400	3.94745	0.00283696	Conserved hypothetical protein. (Os07t0591400-01)
Os04g0688600	3.92675	0.00386456	Peroxidase (EC 1.11.1.7). (Os04t0688600-01)
Os03g0854600	3.92165	0.0395873	Concanavalin A-like lectin/glucanase domain containing protein. (Os03t0854600-01);Concanavalin A-like lectin/glucanase domain containing protein. (Os03t0854600-02)
Os10g0147200	3.89743	0.0346867	Similar to Thaumatin-like protein. (Os10t0147200-01)
Os01g0819200	3.88857	0.0363987	Similar to calcium lipid binding protein-like. (Os01t0819200-00)
Os11g0175500	3.88179	0.00192628	Zinc finger, RING/FYVE/PHD-type domain containing protein. (Os11t0175500-01);Zinc finger, RING/FYVE/PHD-type domain containing protein. (Os11t0175500-02)
Os07g0417200	3.87528	0.021773	Similar to Delta 12 oleic acid desaturase FAD2. (Os07t0417200-01)
Os11g0539901	3.87235	2.92e-05	Hypothetical conserved gene. (Os11t0539901-01)
Os12g0117100	3.86065	0.0120244	Alpha/beta hydrolase fold-1 domain containing protein. (Os12t0117100-01)
Os06g0499100	3.8129	0.0190609	Hypothetical conserved gene. (Os06t0499100-00)
Os03g0374600	3.80332	0.0195774	Glycoside hydrolase, family 17 protein. (Os03t0374600-01);Similar to Glucan endo-1,3-beta-glucosidase 4. (Os03t0374600-02)
Os12g0548300	3.79774	0.0414127	Nucleoside diphosphate kinase, Regulation of chloroplast development and chlorophyll biosynthesis, Abiotic stress response (ABA and salinity) (Os12t0548300-01);Similar to Nucleoside diphosphate kinase (Fragment). (Os12t0548300-02);Similar to Nucleoside diphosphate kinase (Fragment). (Os12t0548300-03)
Os12g0555500	3.77083	0.010273	Probenazole-inducible protein PBZ1. (Os12t0555500-01)
Os03g0113900	3.75469	0.00141963	Protein of unknown function DUF584 family protein. (Os03t0113900-02)
Os01g0652450	3.73114	0.0224078	Hypothetical gene. (Os01t0652450-00)
Os11g0260100	3.71162	0.00269832	SAM dependent carboxyl methyltransferase family protein. (Os11t0260100-00)
Os11g0133800	3.70651	0.00767987	Similar to zinc finger (DHHC type) family protein. (Os11t0133800-00)
Os08g0106700	3.70163	0.0191936	Similar to 10A19I.15. (Os08t0106700-00)
Os05g0142500	3.69907	0.0103067	Hypothetical conserved gene. (Os05t0142500-00)
Os04g0356600	3.69081	0.0170485	Similar to OSIGBa0105P02.3 protein. (Os04t0356600-01)
Os11g0251400	3.68976	1.12e-07	Hypothetical conserved gene. (Os11t0251400-01);Ankyrin repeat containing protein. (Os11t0251400-02);Hypothetical conserved gene. (Os11t0251400-03);Ankyrin repeat domain containing protein. (Os11t0251400-04)
Os03g0643250	3.68826	0.0107959	Similar to Hydrolase-like protein. (Os03t0643250-00)
Os12g0448900	3.67759	0.0282901	Fatty acid alpha-dioxygenase family, Enzyme that oxygenates fatty acids into 2R-hydroperoxides (Os12t0448900-01)
Os06g0673800	3.67676	0.00821175	Conserved hypothetical protein. (Os06t0673800-01)
Os11g0474800	3.67051	0.0446202	Similar to Isoform 2 of Stemar-13-ene synthase. (Os11t0474800-01)
Os06g0707250	3.66615	0.03724	Hypothetical genes. (Os06t0707250-00)
Os11g0471200	3.66315	0.0406044	Conserved hypothetical protein. (Os11t0471200-01)
Os10g0146901	3.66161	0.0432992	Hypothetical protein. (Os10t0146901-00)
Os01g0682700	3.64646	0.0221371	Conserved hypothetical protein. (Os01t0682700-01)
Os03g0794400	3.62259	0.0133711	Similar to N-acetyltransferase. (Os03t0794400-00)
Os03g0321800	3.60227	0.0128718	Similar to WRKY transcription factor 55. (Os03t0321800-01);Similar to WRKY transcription factor 55. (Os03t0321800-02)
Os04g0623400	3.5737	0.0124902	Exonuclease domain containing protein. (Os04t0623400-01);Similar to H0215F08.4 protein. (Os04t0623400-02)
Os01g0125600	3.54845	0.0263474	Heavy metal transport/detoxification protein domain containing protein. (Os01t0125600-01)
Os06g0201200	3.52066	0.0211354	Conserved hypothetical protein. (Os06t0201200-01)
Os04g0644700	3.51648	0.00606145	Coatomer, epsilon subunit domain containing protein. (Os04t0644700-00)
Os04g0687150	3.50331	0.0311312	Hypothetical protein. (Os04t0687150-01)
Os05g0556350	3.50276	0.0334446	Hypothetical gene. (Os05t0556350-01)
Os07g0537900	3.5017	0.00543124	Similar to SRK3 gene. (Os07t0537900-01);Hypothetical conserved gene. (Os07t0537900-02)
Os03g0192750	3.48133	0.0404832	Hypothetical gene. (Os03t0192750-00)
Os01g0218200	3.4694	0.0121088	Thioredoxin domain 2 containing protein. (Os01t0218200-00)
Os06g0272800	3.42614	0.0320777	Domain of unknown function DUF231, plant domain containing protein. (Os06t0272800-00)
Os05g0575101	3.391	0.0225563	Similar to amino acid transport protein. (Os05t0575101-00)
Os07g0599300	3.37044	0.0141603	Hypothetical protein. (Os07t0599300-01)
Os02g0806000	3.33193	0.00634742	Acyl-CoA N-acyltransferase domain containing protein. (Os02t0806000-01);Similar to N-acetyltransferase. (Os02t0806000-02)
Os02g0701300	3.32316	0.0206924	Growth-regulating factor, Regulation of grain shape and panicle length, Negative regulation of seed shattering (Os02t0701300-01)
Os12g0175400	3.32234	0.0223346	Similar to OSMYB2. (Os12t0175400-01)
Os10g0331500	3.3046	0.0326423	Hypothetical protein. (Os10t0331500-01)
Os10g0492600	3.29615	0.0404832	Similar to Tonoplast membrane integral protein ZmTIP3-1. (Os10t0492600-01)
Os11g0250100	3.28822	0.00328463	Conserved hypothetical protein. (Os11t0250100-01)
Os01g0616100	3.27181	0.0274151	Similar to kinase family protein. (Os01t0616100-01);Hypothetical conserved gene. (Os01t0616100-02)
Os04g0654500	3.26783	0.0137282	Conserved hypothetical protein. (Os04t0654500-01)
Os04g0678800	3.26505	0.019926	N-acetylglucosaminyl phosphatidylinositol deacetylase domain containing protein. (Os04t0678800-01);N-acetylglucosaminyl phosphatidylinositol deacetylase domain containing protein. (Os04t0678800-02)
Os05g0223200	3.25889	0.00402559	Similar to Glycine-rich RNA-binding protein GRP2A. (Os05t0223200-01)
Os05g0296800	3.23708	0.0389138	Similar to Retrotransposon Karma DNA, complete sequence. (Os05t0296800-01);Conserved hypothetical protein. (Os05t0296800-02)
Os02g0201900	3.23565	0.0219827	DNA/RNA helicase, C-terminal domain containing protein. (Os02t0201900-01);DNA/RNA helicase, C-terminal domain containing protein. (Os02t0201900-02)
Os08g0202300	3.23323	0.0149488	Hypothetical conserved gene. (Os08t0202300-01);Conserved hypothetical protein. (Os08t0202300-02);Reverse transcriptase domain containing protein. (Os08t0202300-03);Similar to SHR5-receptor-like kinase (Fragment). (Os08t0202300-04)
Os07g0248900	3.20707	0.00696942	Transposase, MuDR, plant domain containing protein. (Os07t0248900-01)
Os02g0136400	3.20634	0.00452727	Conserved hypothetical protein. (Os02t0136400-00)
Os06g0687200	3.19178	0.00396398	Zinc finger, RING/FYVE/PHD-type domain containing protein. (Os06t0687200-01)
Os02g0720600	3.18826	0.0147329	Peptidase A1 domain containing protein. (Os02t0720600-01)
Os08g0404500	3.18548	0.0209391	C1-like domain containing protein. (Os08t0404500-01);C1-like domain containing protein. (Os08t0404500-02)
Os04g0599000	3.18537	0.0358558	Similar to WAK53a - OsWAK receptor-like protein kinase. (Os04t0599000-01);Serine/threonine protein kinase-related domain containing protein. (Os04t0599000-02)
Os06g0726900	3.17936	0.0260001	Armadillo domain containing protein. (Os06t0726900-00)
Os02g0577900	3.17296	0.0146151	Conserved hypothetical protein. (Os02t0577900-01)
Os03g0802650	3.15525	0.014005	Hypothetical gene. (Os03t0802650-00)
Os03g0236200	3.15221	0.0352752	Similar to Glutamate decarboxylase isozyme 3 (EC 4.1.1.15). (Os03t0236200-01)
Os09g0473600	3.14479	0.0172263	Hypothetical conserved gene. (Os09t0473600-00)
Os01g0511100	3.14113	0.00322074	UspA domain containing protein. (Os01t0511100-01)
Os01g0149700	3.13336	0.00467459	Hypothetical conserved gene. (Os01t0149700-00)
Os05g0386000	3.12326	0.014991	Similar to Root determined nodulation 1. (Os05t0386000-01);Similar to Root determined nodulation 1. (Os05t0386000-02);Similar to predicted protein. (Os05t0386000-03);Conserved hypothetical protein. (Os05t0386000-04)
Os08g0393900	3.1203	0.04408	Hypothetical gene. (Os08t0393900-01);Hypothetical protein. (Os08t0393900-02)
Os04g0581700	3.10194	0.0206654	Similar to predicted protein. (Os04t0581700-01)
Os08g0481000	3.04071	0.0473737	Pentatricopeptide repeat domain containing protein. (Os08t0481000-01);Pentatricopeptide repeat domain containing protein. (Os08t0481000-02);Hypothetical conserved gene. (Os08t0481000-03)
Os02g0240300	3.03919	0.0434992	Similar to Class III peroxidase GvPx2b (Fragment). (Os02t0240300-01)
Os11g0280600	3.03272	0.00045668	Hypothetical protein. (Os11t0280600-01)
Os01g0225000	3.02197	0.0264324	Mitochondrial carrier protein domain containing protein. (Os01t0225000-00)
Os07g0616100	3.01706	0.0110577	Conserved hypothetical protein. (Os07t0616100-01)
Os07g0111400	2.99863	0.0293917	WRKY transcription factor 29. (Os07t0111400-00)
Os06g0113950	2.99755	0.00317545	Hypothetical conserved gene. (Os06t0113950-01);Similar to RuBisCO large subunit-binding protein subunit beta. (Os06t0113950-02)
Os06g0644250	2.99616	0.034944	Hypothetical protein. (Os06t0644250-00)
Os03g0162000	2.99268	0.00319783	Flavin-containing monooxygenase (FMO), Auxin biosynthesis (Os03t0162000-01)
Os11g0506800	2.99187	0.0488837	Similar to BAG domain containing protein. (Os11t0506800-00)
Os10g0136200	2.97054	0.0190984	Cyclin-like F-box domain containing protein. (Os10t0136200-01);Similar to F-box domain containing protein, expressed. (Os10t0136200-02)
Os04g0154800	2.94086	0.027491	Protein of unknown function DUF594 family protein. (Os04t0154800-01)
Os10g0527400	2.94014	0.0249923	Similar to Tau class GST protein 3. (Os10t0527400-01)
Os05g0586300	2.93052	0.000508544	Similar to FMA (FAMA); DNA binding / transcription activator/ transcription factor. (Os05t0586300-00)
Os01g0591300	2.92716	0.000928438	Similar to Cytosolic aldehyde dehydrogenase RF2D. (Os01t0591300-01);Similar to aldehyde dehydrogenase5. (Os01t0591300-02)
Os01g0528300	2.92602	0.00580028	Similar to OSIGBa0142C11.3 protein. (Os01t0528300-01)
Os02g0190300	2.92521	3.7e-05	P-glycoprotein homologue. (Os02t0190300-01)
Os07g0656500	2.90581	0.0305595	Similar to Magnesium-chelatase subunit H family protein, expressed. (Os07t0656500-00)
Os10g0517800	2.90111	0.00809958	Hypothetical protein. (Os10t0517800-01)
Os03g0695600	2.89943	0.00340157	Proteasome subunit beta type 2 (EC 3.4.25.1) (20S proteasome alpha subunit D) (20S proteasome subunit beta-4). (Os03t0695600-01);Similar to Proteasome subunit beta type-2. (Os03t0695600-02);Proteasome subunit beta type 2 (EC 3.4.25.1) (20S proteasome alpha subunit D) (20S proteasome subunit beta-4). (Os03t0695600-03)
Os02g0514326	2.89004	0.0401883	Hypothetical protein. (Os02t0514326-00)
Os08g0436700	2.88434	0.0440674	Similar to NAC transcription factor. (Os08t0436700-01)
Os11g0479000	2.84563	0.028065	Conserved hypothetical protein. (Os11t0479000-01)
Os03g0277500	2.84348	0.0366702	Similar to Glyoxalase family protein, expressed. (Os03t0277500-01)
Os02g0467500	2.83909	0.0218563	Aminotransferase-like, plant mobile domain domain containing protein. (Os02t0467500-01)
Os10g0464000	2.8262	0.00521362	Similar to Hypersensitive-induced response protein. (Os10t0464000-01)
Os03g0237500	2.82175	0.0145327	Similar to predicted protein. (Os03t0237500-01);Protein of unknown function DUF775 family protein. (Os03t0237500-02)
Os06g0670100	2.81983	0.0433251	Conserved hypothetical protein. (Os06t0670100-01)
Os11g0692400	2.79546	0.000154698	Conserved hypothetical protein. (Os11t0692400-01)
Os03g0669100	2.79015	0.0330696	Similar to predicted protein. (Os03t0669100-01);Similar to Deoxyuridine 5'-triphosphate nucleotidohydrolase (EC 3.6.1.23) (dUTPase) (dUTP pyrophosphatase) (P18). (Os03t0669100-02)
Os01g0159800	2.78947	0.014658	Similar to DNA binding protein. (Os01t0159800-01)
Os03g0387300	2.76279	0.0209142	Similar to VQ motif family protein, expressed. (Os03t0387300-01)
Os01g0190400	2.74795	0.0357325	Similar to Hexokinase. (Os01t0190400-01);Similar to Hexokinase. (Os01t0190400-02)
Os10g0331600	2.74686	0.00508765	UDP-glucuronosyl/UDP-glucosyltransferase domain containing protein. (Os10t0331600-00)
Os04g0619600	2.7452	0.0207748	Similar to Resistance protein candidate (Fragment). (Os04t0619600-01);Similar to Resistance protein candidate (Fragment). (Os04t0619600-02);Similar to Resistance protein candidate (Fragment). (Os04t0619600-03)
Os11g0496500	2.70944	0.0016273	Similar to AT.I.24-5 protein (Fragment). (Os11t0496500-01)
Os12g0235200	2.70572	0.00944991	Conserved hypothetical protein. (Os12t0235200-01)
Os02g0496300	2.70098	1.02e-05	Conserved hypothetical protein. (Os02t0496300-01);Conserved hypothetical protein. (Os02t0496300-02)
Os05g0498851	2.70079	0.00220777	Hypothetical protein. (Os05t0498851-00)
Os03g0689866	2.69738	0.0337991	Conserved hypothetical protein. (Os03t0689866-00)
Os03g0692400	2.69187	0.0182307	Protein of unknown function DUF966 family protein. (Os03t0692400-01);Protein of unknown function DUF966 family protein. (Os03t0692400-02)
Os09g0527650	2.69075	0.0430403	Hypothetical protein. (Os09t0527650-00)
Os06g0629362	2.664	0.0167673	Conserved hypothetical protein. (Os06t0629362-01)
Os03g0154000	2.66086	0.0010823	Aromatic-ring hydroxylase family protein. (Os03t0154000-01)
Os05g0299101	2.6515	0.0294652	Hypothetical gene. (Os05t0299101-00)
Os11g0605300	2.65021	1.28e-06	Conserved hypothetical protein. (Os11t0605300-01)
Os01g0757500	2.63517	0.0465937	CS domain domain containing protein. (Os01t0757500-01);Similar to Calcyclin-binding protein. (Os01t0757500-02)
Os07g0244400	2.61985	0.0103212	Pentatricopeptide repeat domain containing protein. (Os07t0244400-01)
Os04g0624701	2.61815	0.0463661	Hypothetical conserved gene. (Os04t0624701-00)
Os03g0351700	2.60988	0.0310836	Conserved hypothetical protein. (Os03t0351700-01)
Os12g0617000	2.5926	0.0013956	Similar to Drought and salt tolerance protein. (Os12t0617000-00)
Os04g0447700	2.58176	0.0120049	Similar to Polyketide reductase. (Os04t0447700-01)
Os09g0100800	2.57325	0.0207864	Protein of unknown function DUF573 domain containing protein. (Os09t0100800-01)
Os08g0451500	2.56652	0.00913947	Conserved hypothetical protein. (Os08t0451500-01)
Os04g0376200	2.54912	0.0220164	Conserved hypothetical protein. (Os04t0376200-00)
Os02g0125200	2.53348	0.0135465	Similar to DNA-binding protein. (Os02t0125200-00)
Os02g0817800	2.52315	0.027193	Similar to Telomere binding protein-1. (Os02t0817800-01);Similar to Telomere binding protein-1. (Os02t0817800-02);Telomere binding protein , Establishing and /or maintaining an active telomere configuration (Os02t0817800-03)
Os03g0185200	2.52243	0.0151081	Pentatricopeptide repeat domain containing protein. (Os03t0185200-01)
Os02g0122600	2.50382	0.00434728	EF-Hand type domain containing protein. (Os02t0122600-00)
Os08g0482300	2.47068	0.000177509	Pistil-specific extensin-like protein domain containing protein. (Os08t0482300-01)
Os03g0208600	2.4692	0.0403332	Pentatricopeptide repeat domain containing protein. (Os03t0208600-01)
Os02g0736800	2.46275	0.0315961	Conserved hypothetical protein. (Os02t0736800-01)
Os01g0508100	2.45987	0.0480985	Ferritin/ribonucleotide reductase-like family protein. (Os01t0508100-01)
Os10g0570200	2.45747	0.0461894	Similar to RIR1b protein precursor. (Os10t0570200-01)
Os01g0585100	2.43724	0.00315645	Similar to Integral membrane protein. (Os01t0585100-01)
Os02g0139000	2.43273	0.00961407	Transcription factor, Regulation of Pi signaling and homeostasis, Tolerance to low-Pi stress (Os02t0139000-01)
Os06g0202700	2.42341	0.0261398	Conserved hypothetical protein. (Os06t0202700-01)
Os01g0203400	2.41276	0.021893	Hypothetical protein. (Os01t0203400-01)
Os10g0365200	2.41072	0.000920185	Thioredoxin fold domain containing protein. (Os10t0365200-00)
Os07g0106700	2.40288	0.0396485	Similar to disease resistance response protein 206. (Os07t0106700-01);Similar to Aminotransferase-like protein. (Os07t0106700-02)
Os11g0406945	2.38394	0.0086826	Similar to Phenazine biosynthesis-like protein, expressed. (Os11t0406945-00)
Os10g0318900	2.3716	0.0119448	Similar to ER6 protein (Fragment). (Os10t0318900-01)
Os05g0502000	2.37029	0.00183636	Similar to Cyclic nucleotide-gated ion channel 4 (AtCNGC4) (Cyclic nucleotide-and calmodulin-regulated ion channel 4) (AtHLM1). (Os05t0502000-01)
Os08g0410350	2.36714	0.0260235	Hypothetical gene. (Os08t0410350-01)
Os04g0616600	2.36619	0.0474702	Serine/threonine protein kinase-related domain containing protein. (Os04t0616600-01)
Os06g0714950	2.35706	0.0278998	Hypothetical gene. (Os06t0714950-00)
Os03g0289200	2.35032	0.00184629	Similar to H/ACA ribonucleoprotein complex subunit 1-like protein (GCR 101 snRNP). (Os03t0289200-01);Similar to protein YIP1. (Os03t0289200-02)
Os03g0650900	2.34749	0.00135096	Ortholog of Arabidopsis NLA (AtNLA), RING-type E3 ubiquitin-ligase (Os03t0650900-01)
Os07g0587300	2.34163	0.0366283	Hypothetical conserved gene. (Os07t0587300-01)
Os04g0643700	2.33443	0.000823271	Pentatricopeptide repeat domain containing protein. (Os04t0643700-01);Pentatricopeptide repeat domain containing protein. (Os04t0643700-02);Similar to H0306F03.10 protein. (Os04t0643700-03)
Os04g0516701	2.32129	0.0225168	Hypothetical gene. (Os04t0516701-00)
Os01g0113600	2.31175	0.00934288	Hypothetical protein. (Os01t0113600-01);Hypothetical protein. (Os01t0113600-02)
Os06g0493100	2.31158	0.00412957	Conserved hypothetical protein. (Os06t0493100-01)
Os04g0372201	2.30673	0.0343724	Conserved hypothetical protein. (Os04t0372201-01)
Os06g0523100	2.30597	0.0170121	Similar to loricrin-related. (Os06t0523100-01);Similar to predicted protein. (Os06t0523100-02)
Os11g0686250	2.30372	0.00382655	DNA-binding WRKY domain containing protein. (Os11t0686250-00)
Os05g0179100	2.2979	0.04688	DVL family protein. (Os05t0179100-01)
Os03g0743500	2.29301	0.00182242	Calcium-binding EF-hand domain containing protein. (Os03t0743500-01);Similar to Calmodulin 1 (Fragment). (Os03t0743500-02)
Os05g0197300	2.2725	0.00769009	IQ calmodulin-binding region domain containing protein. (Os05t0197300-01)
Os03g0593700	2.27157	0.0126999	Hypothetical conserved gene. (Os03t0593700-00)
Os11g0520500	2.2674	0.000241523	Conserved hypothetical protein. (Os11t0520500-00)
Os09g0133800	2.26574	0.00109206	Conserved hypothetical protein. (Os09t0133800-01);Hypothetical conserved gene. (Os09t0133800-02)
Os09g0124800	2.25793	0.0324214	Tetratricopeptide-like helical domain containing protein. (Os09t0124800-01)
Os04g0401700	2.24456	0.0440658	Potassium transporter, Potassium mediated growth, Salt tolerance (Os04t0401700-01);Similar to Isoform 2 of Potassium transporter 1. (Os04t0401700-02);Potassium transporter 1 (OsHAK1). Splice isoform 2. (Os04t0401700-03)
Os05g0213900	2.2294	0.0007238	Virulence factor, pectin lyase fold family protein. (Os05t0213900-01)
Os04g0631800	2.22668	0.00635923	Similar to H0105C05.10 protein. (Os04t0631800-00)
Os05g0183100	2.21489	0.00276946	Similar to WRKY transcription factor 16 (Fragment). (Os05t0183100-01)
Os07g0561800	2.2118	0.00846701	Similar to carbohydrate transporter/ sugar porter. (Os07t0561800-01);Similar to carbohydrate transporter/ sugar porter. (Os07t0561800-02)
Os01g0583700	2.20948	0.0177806	Similar to predicted protein. (Os01t0583700-00)
Os12g0630750	2.20631	0.000133169	Similar to cDNA clone:J023055K12, full insert sequence. (Os12t0630750-00)
Os05g0172800	2.19628	0.0436277	Conserved hypothetical protein. (Os05t0172800-01)
Os10g0178500	2.19084	1.43e-06	UDP-glucuronosyl/UDP-glucosyltransferase family protein. (Os10t0178500-01)
Os07g0179000	2.18782	0.0485702	Pentatricopeptide repeat domain containing protein. (Os07t0179000-01);Pentatricopeptide repeat domain containing protein. (Os07t0179000-02);Pentatricopeptide repeat domain containing protein. (Os07t0179000-03)
Os05g0130500	2.17347	0.0060402	Hypothetical protein. (Os05t0130500-01)
Os08g0111200	2.17201	0.00275275	Beta-glucosidase, GBA2 type domain containing protein. (Os08t0111200-01);Similar to predicted protein. (Os08t0111200-02)
Os11g0227200	2.16222	0.0118192	Similar to NBS-LRR disease resistance protein homologue. (Os11t0227200-01)
Os09g0416200	2.16071	0.000384941	Similar to Glucose transporter (Fragment). (Os09t0416200-01)
Os10g0135700	2.15723	0.000611422	Hypothetical gene. (Os10t0135700-01)
Os03g0152900	2.15699	0.0117148	Similar to predicted protein. (Os03t0152900-01)
Os01g0606133	2.14464	0.00180195	Hypothetical conserved gene. (Os01t0606133-00)
Os04g0675500	2.14305	0.00695658	Similar to Itm1 protein. (Os04t0675500-01);Non-protein coding transcript. (Os04t0675500-02);Similar to Itm1 protein. (Os04t0675500-03)
Os03g0818100	2.14274	0.00568107	Histidine acid phosphatase family protein. (Os03t0818100-01);Similar to Multiple inositol polyphosphate phosphatase PhyIIa2. (Os03t0818100-02)
Os05g0314700	2.13664	0.0341199	Conserved hypothetical protein. (Os05t0314700-01)
Os03g0684500	2.13315	0.0205267	Similar to glycosyltransferase family protein 47. (Os03t0684500-01)
Os01g0949750	2.1324	0.00848144	Similar to Glutathione S-transferase GST 28 (Fragment). (Os01t0949750-00)
Os02g0122100	2.13056	0.000290606	Similar to JHL05D22.13 protein. (Os02t0122100-00)
Os11g0702600	2.12308	0.0294753	Hypothetical conserved gene. (Os11t0702600-00)
Os01g0720801	2.1156	0.00603489	Hypothetical gene. (Os01t0720801-01)
Os10g0166300	2.10941	3.71e-05	Hypothetical gene. (Os10t0166300-01)
Os11g0422000	2.10187	0.00447687	Conserved hypothetical protein. (Os11t0422000-01)
Os03g0670000	2.09732	0.000140047	Domain of unknown function DUF1713, mitochondria domain containing protein. (Os03t0670000-01);Domain of unknown function DUF1713, mitochondria domain containing protein. (Os03t0670000-02)
Os12g0543600	2.08718	0.00618841	Similar to sarcosine oxidase. (Os12t0543600-00)
Os04g0444300	2.08173	0.0104599	Similar to ARGOS. (Os04t0444300-01)
Os05g0456800	2.07884	0.00103494	Hypothetical gene. (Os05t0456800-01)
Os04g0339400	2.07207	0.0493488	Aldo/keto reductase family protein. (Os04t0339400-01)
Os01g0136200	2.07037	0.0320837	16.9 kDa class I heat shock protein 1. (Os01t0136200-01)
Os04g0581400	2.06941	0.00388757	B3 DNA binding domain containing protein, Brassinosteroid homeostasis (Os04t0581400-01)
Os01g0128200	2.06104	0.0376267	Similar to Nuclease I. (Os01t0128200-01)
Os10g0415300	2.05651	0.0305753	Similar to Chloroplastic glutathione reductase. (Os10t0415300-01);Glutathione reductase, Salt tolerance (Os10t0415300-02)
Os09g0300800	2.05053	0.0233957	Protein of unknown function DUF247, plant family protein. (Os09t0300800-01)
Os07g0471050	2.04609	0.00410239	Hypothetical gene. (Os07t0471050-01)
Os01g0846500	2.04191	0.00570378	Hypothetical conserved gene. (Os01t0846500-01);PAP/25A core domain containing protein. (Os01t0846500-02)
Os03g0784400	2.03531	5.38e-05	Protein of unknown function DUF1692 domain containing protein. (Os03t0784400-01);Similar to predicted protein. (Os03t0784400-02)
Os03g0321700	2.03133	0.0273396	Similar to WRKY transcription factor 55. (Os03t0321700-01)
Os03g0369700	2.0278	0.0240404	Similar to Pentatricopeptide repeat protein PPR868-14. (Os03t0369700-01)
Os03g0700450	2.02355	0.0229529	Hypothetical gene. (Os03t0700450-00)
Os03g0395700	2.0129	0.000364383	Conserved hypothetical protein. (Os03t0395700-01);Conserved hypothetical protein. (Os03t0395700-02)
Os05g0157600	2.00698	0.0442912	Hypothetical conserved gene. (Os05t0157600-01)
Os10g0536400	1.99552	0.00100371	Similar to Oxidoreductase, 2OG-Fe oxygenase family protein, expressed. (Os10t0536400-01)
Os01g0742000	1.99036	0.000622112	tRNA/rRNA methyltransferase, SpoU domain containing protein. (Os01t0742000-01)
Os01g0778800	1.98763	0.00197042	Peptidase M16, core domain containing protein. (Os01t0778800-01)
Os05g0407100	1.98467	0.000745748	Four F5 protein family protein. (Os05t0407100-01)
Os12g0477700	1.97253	0.00681872	Conserved hypothetical protein. (Os12t0477700-01)
Os07g0271000	1.97176	0.00084367	Similar to GDP dissociation inhibitor protein OsGDI1. (Os07t0271000-01)
Os05g0496000	1.95349	3.82e-05	Conserved hypothetical protein. (Os05t0496000-01)
Os01g0588200	1.94398	0.00438757	Voltage-dependent anion channel. (Os01t0588200-01);Voltage-dependent anion channel. (Os01t0588200-02)
Os10g0477600	1.94245	0.0241451	Similar to NAM / CUC2-like protein. (Os10t0477600-01)
Os05g0120700	1.93545	0.00268749	ATPase, P-type, K/Mg/Cd/Cu/Zn/Na/Ca/Na/H-transporter family protein. (Os05t0120700-01)
Os10g0546400	1.93474	0.00243099	Conserved hypothetical protein. (Os10t0546400-01)
Os08g0520100	1.9341	0.00209993	Pseudouridine synthase domain containing protein. (Os08t0520100-01);Similar to pseudouridine synthase family protein. (Os08t0520100-02)
Os06g0498800	1.93301	0.0394202	Similar to MOTHER of FT and TF1 protein. (Os06t0498800-01)
Os07g0438700	1.92772	0.0158931	Hypothetical conserved gene. (Os07t0438700-01)
Os09g0491596	1.92555	0.0476938	Conserved hypothetical protein. (Os09t0491596-01)
Os02g0151600	1.92169	0.0417424	Ketol-acid reductoisomerase, chloroplast precursor (EC 1.1.1.86) (Acetohydroxy-acid reductoisomerase) (Alpha-keto-beta-hydroxylacil reductoisomerase). (Os02t0151600-00)
Os11g0206300	1.92139	0.0254819	Similar to Mitochondrial transcription termination factor-like family-1. (Os11t0206300-01)
Os02g0794700	1.91968	0.0230324	Similar to Cytosol aminopeptidase (EC 3.4.11.1) (Leucine aminopeptidase) (LAP) (Leucyl aminopeptidase) (Proline aminopeptidase) (EC 3.4.11.5) (Prolyl aminopeptidase). (Os02t0794700-01);Similar to Leucine aminopeptidase (Cytosol aminopeptidase) (Fragment). (Os02t0794700-02)
Os12g0284000	1.91901	0.000237081	Regulator of chromosome condensation, RCC1 domain containing protein. (Os12t0284000-01);Similar to predicted protein. (Os12t0284000-02);Regulator of chromosome condensation, RCC1 domain containing protein. (Os12t0284000-03);Hypothetical conserved gene. (Os12t0284000-04)
Os12g0158600	1.91465	0.0369053	TB2/DP1 and HVA22 related protein family protein. (Os12t0158600-00)
Os11g0484300	1.89939	0.00263032	Similar to Mcm2-prov protein. (Os11t0484300-01)
Os06g0150400	1.88752	0.00183636	Conserved hypothetical protein. (Os06t0150400-01)
Os05g0455900	1.88687	0.0340282	Pentatricopeptide repeat domain containing protein. (Os05t0455900-01)
Os08g0256000	1.88679	0.00020837	Conserved hypothetical protein. (Os08t0256000-01)
Os02g0734600	1.88669	0.0007692	Similar to EFA27 for EF hand, abscisic acid, 27kD. (Os02t0734600-01);Similar to caleosin related protein. (Os02t0734600-02)
Os01g0246700	1.87826	0.019926	Similar to WRKY transcription factor 1. (Os01t0246700-01)
Os11g0256400	1.8735	7.43e-06	Zinc finger, SWIM-type domain containing protein. (Os11t0256400-01)
Os10g0543500	1.87341	0.0188158	Six-bladed beta-propeller, TolB-like domain containing protein. (Os10t0543500-01)
Os03g0327800	1.87197	0.013138	NAC Family transcriptional activator, Abiotic stress response, Positive regulator of leaf senescence (Os03t0327800-01)
Os01g0874700	1.87152	5.85e-05	GOLD domain containing protein. (Os01t0874700-01);GOLD domain containing protein. (Os01t0874700-02);Similar to patellin-1. (Os01t0874700-03)
Os08g0411000	1.86693	0.043572	Prephenate dehydratase domain containing protein. (Os08t0411000-00)
Os05g0595100	1.85933	0.00821337	Uridine-diphospho-(UDP)-glucose 4-epimerase, Cell wall carbohydrate partitioning during nitrogen (N) limitation (Os05t0595100-01)
Os07g0173850	1.85145	0.0399201	Hypothetical gene. (Os07t0173850-00)
Os11g0168600	1.84454	0.0384123	Protein kinase, core domain containing protein. (Os11t0168600-01)
Os11g0269700	1.8432	0.00600814	Hypothetical protein. (Os11t0269700-01)
Os02g0526600	1.8428	0.009585	Peptidase C12, ubiquitin carboxyl-terminal hydrolase 1 domain containing protein. (Os02t0526600-01)
Os02g0117200	1.8367	0.000713468	Similar to MIR-interacting saposin-like protein. (Os02t0117200-01)
Os05g0519300	1.83281	0.00126745	Protein of unknown function DUF506, plant family protein. (Os05t0519300-01)
Os03g0429000	1.82239	4.5e-05	Proteinase inhibitor I25, cystatin domain containing protein. (Os03t0429000-01)
Os07g0107800	1.82235	0.00121917	Similar to Phytosulfokine receptor precursor (EC 2.7.1.37) (Phytosulfokine LRR receptor kinase). (Os07t0107800-01);Hypothetical conserved gene. (Os07t0107800-02)
Os07g0499800	1.81738	0.000401847	Ubiquitin-protein ligase E3 MDM2 domain containing protein. (Os07t0499800-01)
Os01g0209700	1.81261	0.0469279	Similar to GA 2-oxidase 5. (Os01t0209700-01)
Os05g0581200	1.80974	0.00621303	Conserved hypothetical protein. (Os05t0581200-00)
Os06g0225600	1.80821	0.0356516	Conserved hypothetical protein. (Os06t0225600-01)
Os07g0677100	1.8033	0.0471308	Peroxidase. (Os07t0677100-01)
Os05g0574800	1.80126	0.0269495	Hypothetical conserved gene. (Os05t0574800-00)
Os07g0158900	1.79003	0.000908122	Cyclin-like F-box domain containing protein. (Os07t0158900-01);Hypothetical conserved gene. (Os07t0158900-02)
Os04g0586200	1.78076	0.000288454	Similar to H0307D04.13 protein. (Os04t0586200-01)
Os03g0621400	1.77739	0.0199512	Hypothetical conserved gene. (Os03t0621400-01)
Os07g0584100	1.77335	0.00994585	Similar to MAP kinase-like protein. (Os07t0584100-01)
Os04g0538700	1.77061	0.0360547	Autophagy-related protein 13 domain containing protein. (Os04t0538700-01);Autophagy-related protein 13 domain containing protein. (Os04t0538700-02)
Os04g0454600	1.76722	4.71e-06	Similar to OSIGBa0093K19.10 protein. (Os04t0454600-00)
Os01g0104000	1.7667	0.0271857	C-type lectin domain containing protein. (Os01t0104000-01);Similar to predicted protein. (Os01t0104000-02)
Os07g0684800	1.76611	0.0159978	Similar to NAM / CUC2-like protein. (Os07t0684800-01);Similar to NAM / CUC2-like protein. (Os07t0684800-02)
Os06g0503600	1.75772	7.95e-05	Hypothetical conserved gene. (Os06t0503600-01)
Os01g0882300	1.75734	0.00089916	Protein of unknown function DUF803 family protein. (Os01t0882300-01);Similar to permease-related. (Os01t0882300-02)
Os09g0135100	1.75412	0.0243468	Hypothetical conserved gene. (Os09t0135100-00)
Os12g0538900	1.74912	5.05e-06	Armadillo-type fold domain containing protein. (Os12t0538900-01);Similar to predicted protein. (Os12t0538900-02)
Os01g0125550	1.74464	0.0311038	Conserved hypothetical protein. (Os01t0125550-01)
Os08g0521400	1.74322	0.000103367	Similar to Zn-finger, RanBP-type, containing protein. (Os08t0521400-01);Similar to Zn-finger, RanBP-type, containing protein. (Os08t0521400-02);Zinc finger, RanBP2-type domain containing protein. (Os08t0521400-03)
Os05g0464001	1.73879	0.0476617	Conserved hypothetical protein. (Os05t0464001-00)
Os02g0521100	1.73879	0.0330235	Hypothetical conserved gene. (Os02t0521100-01)
Os02g0168600	1.73872	7.81e-05	Ovarian tumour, otubain domain containing protein. (Os02t0168600-01)
Os06g0320801	1.73776	0.000160924	Hypothetical gene. (Os06t0320801-01)
Os05g0526400	1.73757	0.0124408	Reticulon family protein. (Os05t0526400-01)
Os07g0690300	1.73635	0.000560485	Zinc finger, RING/FYVE/PHD-type domain containing protein. (Os07t0690300-01);Hypothetical conserved gene. (Os07t0690300-02)
Os01g0548600	1.73573	0.0245228	Protein kinase, catalytic domain domain containing protein. (Os01t0548600-01)
Os07g0578050	1.72649	0.00755009	Hypothetical gene. (Os07t0578050-00)
Os10g0446600	1.72267	0.0175559	Conserved hypothetical protein. (Os10t0446600-01);Conserved hypothetical protein. (Os10t0446600-02)
Os06g0716000	1.71737	1.67e-05	Protein of unknown function DUF668 family protein. (Os06t0716000-01);Hypothetical conserved gene. (Os06t0716000-02)
Os03g0776900	1.71592	0.000429292	Similar to mitochondrial import inner membrane translocase subunit TIM14. (Os03t0776900-01)
Os06g0730500	1.71022	8.13e-06	Conserved hypothetical protein. (Os06t0730500-01)
Os02g0148700	1.70857	0.0146452	Hypothetical gene. (Os02t0148700-01)
Os08g0275200	1.70418	0.022441	Protein kinase, core domain containing protein. (Os08t0275200-00)
Os04g0516600	1.70244	0.024335	Pyridoxal phosphate-dependent transferase, major region, subdomain 1 domain containing protein. (Os04t0516600-01)
Os11g0303400	1.70197	7.65e-05	Hypothetical conserved gene. (Os11t0303400-01);Similar to Small GTP-binding protein OsRac2. (Os11t0303400-02)
Os06g0114366	1.69709	0.0222957	Pentatricopeptide repeat domain containing protein. (Os06t0114366-00)
Os01g0179600	1.69518	0.00346078	UDP-glucuronosyl/UDP-glucosyltransferase family protein. (Os01t0179600-01)
Os01g0184100	1.69503	0.0434329	Similar to 17.5 kDa class II heat shock protein. (Os01t0184100-01)
Os05g0156500	1.69293	0.00118096	Similar to Apobec-1 binding protein 2. (Os05t0156500-01)
Os09g0459800	1.69145	1.26e-05	Similar to ARP protein. (Os09t0459800-01);Similar to ARP protein. (Os09t0459800-02);Similar to NADPH oxidoreductase homolog (Fragment). (Os09t0459800-03);Similar to predicted protein. (Os09t0459800-04)
Os04g0390500	1.69077	0.0123709	Similar to OSIGBa0132D06.2 protein. (Os04t0390500-01);Mn-nicotianamine transporter, Detoxification of excess manganese (Os04t0390500-02);Iron-phytosiderophore transporter protein yellow stripe 1. (Os04t0390500-03);Similar to OSIGBa0132D06.2 protein. (Os04t0390500-04)
Os10g0155400	1.68929	0.000173515	Similar to Amidase family protein, expressed. (Os10t0155400-00)
Os06g0237000	1.68902	0.00481342	Conserved hypothetical protein. (Os06t0237000-01)
Os08g0307400	1.68775	0.0459344	Similar to Phosphatidylinositol 3-kinase 1. (Os08t0307400-01);Similar to Phosphatidylinositol 3-kinase, root isoform (EC 2.7.1.137) (PI3- kinase) (PtdIns-3-kinase) (PI3K) (SPI3K-5). (Os08t0307400-02);Similar to Phosphatidylinositol 3-kinase 1. (Os08t0307400-03)
Os05g0215300	1.68605	0.0146002	UDP-glucuronosyl/UDP-glucosyltransferase family protein. (Os05t0215300-01)
Os10g0132700	1.67243	0.00432296	Similar to NB-ARC domain containing protein, expressed. (Os10t0132700-01)
Os09g0327550	1.67215	0.000465582	Similar to predicted protein. (Os09t0327550-00)
Os01g0206200	1.67171	0.00022002	Conserved hypothetical protein. (Os01t0206200-01)
Os05g0335800	1.67156	0.00728706	TGF-beta receptor, type I/II extracellular region family protein. (Os05t0335800-01)
Os02g0245100	1.66694	0.00102705	Similar to Peroxisomal targeting signal type 2 receptor. (Os02t0245100-01);Conserved hypothetical protein. (Os02t0245100-02)
Os04g0607400	1.66683	0.00810261	Conserved hypothetical protein. (Os04t0607400-01);Conserved hypothetical protein. (Os04t0607400-04)
Os03g0156700	1.66509	7.43e-05	Nickel/cobalt transporter, high-affinity domain containing protein. (Os03t0156700-01)
Os11g0434800	1.66235	0.00583057	Conserved hypothetical protein. (Os11t0434800-01)
Os02g0602400	1.66205	0.00779554	Mitochodrial transcription termination factor-related family protein. (Os02t0602400-01);Hypothetical conserved gene. (Os02t0602400-02)
Os11g0156700	1.65913	0.00644919	Conserved hypothetical protein. (Os11t0156700-01)
Os02g0684800	1.65835	0.000209711	Hypothetical conserved gene. (Os02t0684800-01)
Os03g0586500	1.65696	1.24e-05	Similar to chloroplast post-illumination chlorophyll fluorescence increase protein. (Os03t0586500-01)
Os01g0578500	1.65632	0.0193394	F-box protein, Indica-Japonica hybrid male sterility (Os01t0578500-01)
Os03g0111600	1.65427	9.98e-06	Protein of unknown function DUF1618 domain containing protein. (Os03t0111600-01)
Os12g0168150	1.65201	0.0282916	Hypothetical gene. (Os12t0168150-00)
Os10g0149700	1.65022	0.0348197	Conserved hypothetical protein. (Os10t0149700-01)
Os12g0534100	1.64852	0.00792422	Conserved hypothetical protein. (Os12t0534100-01)
Os03g0604700	1.64216	0.025421	Hypothetical protein. (Os03t0604700-01)
Os02g0117800	1.63896	0.000180259	Similar to APG5 (Autophagy 5) like protein. (Os02t0117800-01)
Os01g0644600	1.63825	0.00526384	Glutelin family protein. (Os01t0644600-00)
Os01g0966100	1.63492	1.89e-06	Similar to Peroxisomal ABC transporter. (Os01t0966100-01)
Os05g0294800	1.63448	3.09e-05	Hypothetical gene. (Os05t0294800-01)
Os10g0165400	1.62781	0.00097492	Hypothetical gene. (Os10t0165400-01)
Os07g0604000	1.62648	0.000787733	Similar to 6-phosphogluconolactonase-like protein. (Os07t0604000-01);Similar to 6-phosphogluconolactonase-like protein. (Os07t0604000-02)
Os03g0394900	1.62311	0.0356731	Similar to nodulation protein-related. (Os03t0394900-01);Similar to predicted protein. (Os03t0394900-02)
Os02g0151100	1.62243	0.00454307	Hypothetical conserved gene. (Os02t0151100-01)
Os01g0859400	1.61911	0.000269616	Protein-tyrosine phosphatase, dual specificity domain containing protein. (Os01t0859400-01);Protein-tyrosine phosphatase, dual specificity domain containing protein. (Os01t0859400-02);Protein-tyrosine phosphatase, dual specificity domain containing protein. (Os01t0859400-03)
Os02g0131000	1.61404	0.0163481	Conserved hypothetical protein. (Os02t0131000-01)
Os08g0462300	1.61392	0.0204659	Cyclin-like F-box domain containing protein. (Os08t0462300-01)
Os01g0165000	1.60937	0.0330978	Transcription factor, Dehydration and salt stress tolerance (Os01t0165000-01);DRE binding protein 2. (Os01t0165000-02)
Os02g0114200	1.60665	0.014588	Serine carboxypeptidase III precursor (EC 3.4.16.5). (Os02t0114200-01);Similar to Serine carboxypeptidase 3. (Os02t0114200-02)
Os11g0204100	1.60427	0.022559	Conserved hypothetical protein. (Os11t0204100-01);Hypothetical conserved gene. (Os11t0204100-02)
Os03g0441050	1.60254	0.0123947	Hypothetical protein. (Os03t0441050-00)
Os12g0118200	1.59276	0.000969273	Conserved hypothetical protein. (Os12t0118200-01)
Os07g0474700	1.59242	0.00113098	Similar to cDNA, clone: J090064H24, full insert sequence. (Os07t0474700-01)
Os11g0701700	1.59024	0.0262436	Hypothetical gene. (Os11t0701700-01);Hypothetical gene. (Os11t0701700-02)
Os01g0621200	1.58928	0.0362252	Similar to proline transporter. (Os01t0621200-00)
Os09g0527600	1.58888	0.000577803	Similar to GTP-binding protein (Fragment). (Os09t0527600-01)
Os11g0308100	1.58744	0.000140207	Similar to Transposase of Tn10 [Oryza sativa (japonica cultivar-group)]. (Os11t0308100-01)
Os02g0819700	1.57348	0.00639698	Zinc finger, Zim17-type family protein. (Os02t0819700-01);Zinc finger, Zim17-type family protein. (Os02t0819700-02)
Os09g0436000	1.57283	4.54e-05	Peptidase cysteine/serine, trypsin-like domain containing protein. (Os09t0436000-01)
Os08g0438400	1.57232	0.000139301	Similar to ZF-HD homeobox protein. (Os08t0438400-01)
Os10g0486916	1.57144	0.0088338	Hypothetical protein. (Os10t0486916-00)
Os06g0136201	1.56912	0.00393596	Hypothetical gene. (Os06t0136201-01)
Os07g0565200	1.56638	0.000155022	Similar to Cell differentiation protein rcd1. (Os07t0565200-01)
Os08g0500700	1.56623	2.74e-05	Similar to Heat shock protein 82. (Os08t0500700-01)
Os01g0348600	1.56618	1.63e-06	Similar to MFP2 (Fatty acid multifunctional protein) (AtMFP2). (Os01t0348600-01);Similar to glyoxysomal fatty acid beta-oxidation multifunctional protein MFP-a. (Os01t0348600-02);Similar to glyoxysomal fatty acid beta-oxidation multifunctional protein MFP-a. (Os01t0348600-03)
Os08g0170200	1.56584	0.00363807	Disease resistance protein domain containing protein. (Os08t0170200-00)
Os05g0495100	1.56584	0.0001468	Zinc finger, C2H2-type domain containing protein. (Os05t0495100-01)
Os10g0135600	1.56333	5.63e-05	Alpha/beta hydrolase family protein. (Os10t0135600-01)
Os04g0428300	1.56216	0.0432097	Protein of unknown function DUF1677, Oryza sativa domain containing protein. (Os04t0428300-00)
Os12g0122400	1.5619	0.00855505	Hypothetical conserved gene. (Os12t0122400-01);Similar to Glycosyl transferase family 8 protein, expressed. (Os12t0122400-02)
Os04g0408700	1.56041	8.77e-05	Similar to DNA-binding protein S1FA1. (Os04t0408700-01)
Os03g0701900	1.55899	8.31e-06	Similar to Pinin/SDK/memA/ protein conserved region containing protein. (Os03t0701900-01)
Os01g0667800	1.55629	0.00725969	Similar to U2 snRNP auxiliary factor, small subunit. (Os01t0667800-01)
Os08g0185300	1.55191	2.89e-05	Conserved hypothetical protein. (Os08t0185300-01)
Os01g0773200	1.55059	0.000157198	Hypothetical conserved gene. (Os01t0773200-01);Conserved hypothetical protein. (Os01t0773200-02)
Os02g0246600	1.54927	0.00740485	Conserved hypothetical protein. (Os02t0246600-01);Conserved hypothetical protein. (Os02t0246600-02)
Os08g0121800	1.54389	0.0184872	Ribosomal protein S21 family protein. (Os08t0121800-01)
Os11g0684700	1.54379	0.00297942	Similar to NB-ARC domain containing protein, expressed. (Os11t0684700-01)
Os04g0527700	1.54268	0.0101271	CHCH domain containing protein. (Os04t0527700-01)
Os03g0824350	1.54161	0.00035929	Conserved hypothetical protein. (Os03t0824350-01);Conserved hypothetical protein. (Os03t0824350-02)
Os07g0231900	1.54039	0.00334148	PDZ/DHR/GLGF domain containing protein. (Os07t0231900-01)
Os04g0389600	1.53854	0.00738821	Conserved hypothetical protein. (Os04t0389600-01)
Os03g0185500	1.53754	0.00195321	Similar to binding protein. (Os03t0185500-01)
Os01g0761300	1.5355	5.22e-05	Similar to Long-chain-fatty-acid-CoA ligase-like protein. (Os01t0761300-01);Hypothetical gene. (Os01t0761300-02)
Os01g0601625	1.53388	0.0205353	Leucine rich repeat, N-terminal domain containing protein. (Os01t0601625-00)
Os10g0512500	1.53219	0.00870982	RNA-binding, CRM domain domain containing protein. (Os10t0512500-01);Similar to Crs1/yhby domain containing protein (Fragment). (Os10t0512500-02)
Os03g0158600	1.52747	0.0441178	Hypothetical conserved gene. (Os03t0158600-00)
Os09g0426000	1.52703	0.00427257	Protein of unknown function DUF6, transmembrane domain containing protein. (Os09t0426000-01)
Os06g0730200	1.5263	0.0218341	Similar to ROOT HAIRLESS 1. (Os06t0730200-01)
Os07g0522500	1.5234	0.0250229	Similar to PDR6 ABC transporter. (Os07t0522500-01)
Os04g0584300	1.52193	0.0499953	Similar to Catalytic/ protein phosphatase type 2C. (Os04t0584300-01)
Os10g0495900	1.52166	0.000158023	Protein of unknown function DUF1218 family protein. (Os10t0495900-01)
Os11g0171500	1.52028	0.000105633	Calcium-dependent protein kinase (Os11t0171500-01)
Os05g0511000	1.5189	5.97e-05	TRAM, LAG1 and CLN8 homology domain containing protein. (Os05t0511000-01);TRAM, LAG1 and CLN8 homology domain containing protein. (Os05t0511000-02)
Os03g0673400	1.51822	0.0396485	Conserved hypothetical protein. (Os03t0673400-01)
Os01g0259200	1.5171	0.000151873	Similar to serine/threonine protein kinase PBS1. (Os01t0259200-01);Similar to Protein kinase. (Os01t0259200-02)
Os07g0159900	1.51147	0.00311735	Thioredoxin fold domain containing protein. (Os07t0159900-01)
Os03g0801600	1.51141	0.0206451	Similar to vacuolar protein sorting 35. (Os03t0801600-01);Similar to vacuolar protein sorting 35. (Os03t0801600-02)
Os02g0806900	1.51055	0.00126399	Pyridoxal phosphate-dependent transferase, major region, subdomain 1 domain containing protein. (Os02t0806900-01)
Os05g0310500	1.50909	4.89e-05	Similar to Cathepsin B-like cysteine protease. (Os05t0310500-01);Similar to Cathepsin B-like cysteine protease. (Os05t0310500-02);Similar to cDNA clone:J013151C17, full insert sequence. (Os05t0310500-03)
Os10g0467600	1.50451	7.47e-06	Similar to cap-binding protein p28. (Os10t0467600-01)
Os03g0568500	1.50366	0.0046361	Uncharacterised protein family UPF0136, Transmembrane domain containing protein. (Os03t0568500-01)
Os01g0102850	1.50198	0.0262957	Similar to nitrilase 2. (Os01t0102850-00)
Os03g0191400	1.49968	0.0005275	Small GTPase, Regulation of iron homeostasis (Os03t0191400-01)
Os10g0345701	1.49862	0.000521784	Hypothetical conserved gene. (Os10t0345701-01)
Os11g0549680	1.49633	0.000100822	Similar to Zinc knuckle family protein, expressed. (Os11t0549680-01)
Os11g0549665	1.49417	9.51e-05	Hypothetical conserved gene. (Os11t0549665-01);Conserved hypothetical protein. (Os11t0549665-02);Hypothetical conserved gene. (Os11t0549665-03)
Os01g0969000	1.49205	0.000871228	Similar to Chloroplast outer envelope 24 kD protein. (Os01t0969000-01)
Os11g0599100	1.49068	0.0227506	Conserved hypothetical protein. (Os11t0599100-01)
Os10g0518300	1.48904	5.87e-05	Tetratricopeptide-like helical domain containing protein. (Os10t0518300-01)
Os12g0283900	1.48883	0.00447433	Heat shock protein DnaJ, conserved site domain containing protein. (Os12t0283900-01);Heat shock protein DnaJ, conserved site domain containing protein. (Os12t0283900-02)
Os02g0317700	1.4884	6.39e-05	Conserved hypothetical protein. (Os02t0317700-01);Hypothetical conserved gene. (Os02t0317700-02)
Os03g0803700	1.4868	0.000378284	Hypothetical conserved gene. (Os03t0803700-01)
Os04g0659900	1.48436	0.000185746	Similar to OSIGBa0132E09-OSIGBa0108L24.21 protein. (Os04t0659900-01);Similar to OSIGBa0132E09-OSIGBa0108L24.21 protein. (Os04t0659900-02)
Os05g0481400	1.48298	0.000395025	Transcriptional factor B3 family protein. (Os05t0481400-01)
Os03g0148700	1.48269	0.00421164	Similar to Calcium/calmodulin-regulated receptor-like kinase. (Os03t0148700-01);Similar to nodulation receptor kinase. (Os03t0148700-02)
Os07g0631500	1.48253	0.00350623	Similar to Mov34/MPN/PAD-1 family protein. (Os07t0631500-01)
Os12g0197200	1.48235	0.000428597	Conserved hypothetical protein. (Os12t0197200-01);Conserved hypothetical protein. (Os12t0197200-02)
Os03g0761200	1.48228	0.00151106	Ankyrin repeat containing protein. (Os03t0761200-01)
Os06g0303800	1.48088	2.3e-05	Conserved hypothetical protein. (Os06t0303800-01)
Os06g0215300	1.48033	0.000395244	S-adenosylmethionine synthetase domain containing protein. (Os06t0215300-01)
Os10g0105400	1.47857	8.9e-05	Hypothetical conserved gene. (Os10t0105400-01);Conserved hypothetical protein. (Os10t0105400-02);Conserved hypothetical protein. (Os10t0105400-04)
Os01g0155400	1.47721	0.000126072	Conserved hypothetical protein. (Os01t0155400-01)
Os06g0506600	1.47664	0.00105319	Similar to Ubiquitin carrier protein. (Os06t0506600-01)
Os01g0254000	1.47625	6.1e-05	Similar to NTGB2 (Fragment). (Os01t0254000-01)
Os01g0935300	1.47572	0.00383908	Similar to cullin-1. (Os01t0935300-01);Cullin family protein. (Os01t0935300-02)
Os11g0708000	1.47568	0.000307961	Hypothetical protein. (Os11t0708000-01);Hypothetical gene. (Os11t0708000-03)
Os05g0495300	1.47503	0.000770568	Conserved hypothetical protein. (Os05t0495300-01);Hypothetical conserved gene. (Os05t0495300-02);Conserved hypothetical protein. (Os05t0495300-06);Non-protein coding transcript. (Os05t0495300-07)
Os09g0440700	1.47405	0.000756229	Ctr copper transporter family protein. (Os09t0440700-02)
Os07g0687700	1.46915	4.15e-05	Similar to Transcription factor HBP-1b(C38) (Fragment). (Os07t0687700-01)
Os09g0400600	1.46784	0.0322751	Hypothetical protein. (Os09t0400600-01)
Os04g0303950	1.46675	3.26e-05	Similar to OSIGBa0092O07.3 protein. (Os04t0303950-01)
Os03g0116850	1.46044	0.00110648	Hypothetical gene. (Os03t0116850-01)
Os03g0796000	1.45844	0.000284321	Hypothetical conserved gene. (Os03t0796000-01);Similar to Ripening-associated protein (Fragment). (Os03t0796000-02)
Os04g0108300	1.45805	3.81e-05	Protein of unknown function DUF177 family protein. (Os04t0108300-01)
Os07g0112600	1.45714	0.00828171	Conserved hypothetical protein. (Os07t0112600-01)
Os12g0125200	1.45694	0.0361559	Conserved hypothetical protein. (Os12t0125200-01)
Os05g0526300	1.45619	0.0453358	Similar to F-box domain containing protein. (Os05t0526300-01);Similar to F-box domain containing protein. (Os05t0526300-02)
Os07g0646000	1.45471	0.000178588	Conserved hypothetical protein. (Os07t0646000-01)
Os11g0103100	1.4536	0.000480022	Hypothetical conserved gene. (Os11t0103100-00)
Os04g0599400	1.45319	3.29e-05	Scramblase family protein. (Os04t0599400-01)
Os11g0619500	1.45303	0.00449431	Peptidase C19, ubiquitin carboxyl-terminal hydrolase 2 domain containing protein. (Os11t0619500-00)
Os10g0203600	1.45301	0.00856015	DNA-binding SAP domain containing protein. (Os10t0203600-01)
Os01g0648500	1.45241	0.002768	Similar to Transcription initiation factor TFIID subunit 7. (Os01t0648500-01)
Os08g0535600	1.45175	1.69e-05	Zinc finger, Tim10/DDP-type family protein. (Os08t0535600-01)
Os01g0805975	1.45173	0.00166359	Hypothetical gene. (Os01t0805975-01)
Os10g0470700	1.45025	0.0149813	Similar to Peptide transporter. (Os10t0470700-01)
Os08g0460600	1.44996	0.00306641	Similar to Cytokinin dehydrogenase 11. (Os08t0460600-01)
Os09g0554300	1.44911	0.00434532	Auxin efflux carrier domain containing protein. (Os09t0554300-01)
Os02g0730300	1.44783	0.00246712	Similar to Potassium transporter HAK3p (Fragment). (Os02t0730300-01);Similar to Potassium transporter 25. (Os02t0730300-02)
Os11g0103400	1.44721	0.0128972	Similar to IBR domain containing protein. (Os11t0103400-00)
Os01g0867300	1.44711	0.00149289	bZIP transcription factor, Abiotic stress response, ABA signaling, Suppressor of floral transition upon drought stress (Os01t0867300-01)
Os02g0656200	1.44629	0.00558928	Similar to Ceramide kinase. (Os02t0656200-01)
Os07g0660400	1.44608	0.00032306	Similar to pseudouridine synthase family protein. (Os07t0660400-01)
Os01g0574400	1.44585	3.36e-05	Similar to Cell division protein ftsH (EC 3.4.24.-). (Os01t0574400-01);Similar to Cell division protease ftsH homolog 4, mitochondrial. (Os01t0574400-02)
Os03g0654500	1.44526	7.68e-05	Domain of unknown function DUF2215 domain containing protein. (Os03t0654500-01)
Os03g0647500	1.4443	0.0436309	Similar to GTP binding protein. (Os03t0647500-01);Similar to GTP binding protein. (Os03t0647500-02)
Os11g0176300	1.44379	0.0279852	GDP-fucose protein O-fucosyltransferase domain containing protein. (Os11t0176300-01)
Os06g0297800	1.44369	0.00166222	Similar to protein binding / zinc ion binding. (Os06t0297800-01);Similar to predicted protein. (Os06t0297800-02)
Os09g0360900	1.44105	0.00140359	Conserved hypothetical protein. (Os09t0360900-01)
Os08g0414300	1.43859	0.000838851	Conserved hypothetical protein. (Os08t0414300-01);Non-protein coding transcript. (Os08t0414300-02)
Os04g0610200	1.43738	0.000738718	Similar to OSIGBa0152L12.4 protein. (Os04t0610200-01)
Os01g0724500	1.4362	0.0284434	Similar to ABC transporter (PDR5-like) isolog (PDR1 ABC transporter). (Os01t0724500-01)
Os03g0101100	1.43612	6.73e-05	Similar to Palmitoyl-protein thioesterase-like. (Os03t0101100-01)
Os05g0160600	1.43465	0.0131423	Peptidase cysteine/serine, trypsin-like domain containing protein. (Os05t0160600-01)
Os01g0105800	1.43288	0.0186418	Similar to Iron sulfur assembly protein 1. (Os01t0105800-01)
Os02g0622500	1.43273	0.00262056	Conserved hypothetical protein. (Os02t0622500-01)
Os01g0633100	1.43245	0.000688548	ADP-glucose pyrophosphorylase large subunit, Controll of starch biosynthesis in endosperm development (Os01t0633100-01)
Os03g0411900	1.43009	0.012575	Conserved hypothetical protein. (Os03t0411900-01)
Os09g0382400	1.42877	0.0128112	Conserved hypothetical protein. (Os09t0382400-01)
Os09g0567900	1.42758	0.0104931	Inosine/uridine-preferring nucleoside hydrolase domain containing protein. (Os09t0567900-01)
Os12g0123200	1.42634	0.000712234	Glutathione S-transferase GST 7 (EC 2.5.1.18). (Os12t0123200-01)
Os05g0227901	1.42588	0.0162262	Hypothetical gene. (Os05t0227901-01)
Os01g0673900	1.42406	0.00345372	Zinc finger, RING-type domain containing protein. (Os01t0673900-01)
Os05g0401000	1.42136	0.00105556	Lipase, GDSL domain containing protein. (Os05t0401000-01)
Os05g0551350	1.42126	0.000671073	Hypothetical conserved gene. (Os05t0551350-00)
Os03g0353000	1.42026	0.00800503	Conserved hypothetical protein. (Os03t0353000-01)
Os12g0552500	1.41925	0.000434349	Rossmann-like alpha/beta/alpha sandwich fold domain containing protein. (Os12t0552500-01)
Os02g0206833	1.41615	0.0163893	Conserved hypothetical protein. (Os02t0206833-01)
Os03g0805400	1.41248	0.00810602	Phosphatidic acid phosphatase type 2/haloperoxidase domain containing protein. (Os03t0805400-01);Phosphatidic acid phosphatase type 2/haloperoxidase domain containing protein. (Os03t0805400-02);Similar to phosphoric ester hydrolase. (Os03t0805400-03)
Os02g0173100	1.4116	0.00335307	Similar to cytochrome P450. (Os02t0173100-01);Similar to cytochrome P450. (Os02t0173100-02);Similar to Cytochrome P450 97B3 (EC 1.14.-.-). (Os02t0173100-03);Similar to cDNA clone:J013071M18, full insert sequence. (Os02t0173100-04)
Os04g0606450	1.41009	0.000222443	Similar to DNA ligase. (Os04t0606450-01)
Os11g0488400	1.4092	0.00889973	Conserved hypothetical protein. (Os11t0488400-00)
Os03g0755800	1.40496	0.0126939	Similar to 36I5.7. (Os03t0755800-00)
Os05g0557900	1.40288	0.0303767	Esterase/lipase/thioesterase domain containing protein. (Os05t0557900-01)
Os12g0539751	1.40056	0.0383561	Nucleic acid-binding, OB-fold-like domain containing protein. (Os12t0539751-00)
Os03g0322800	1.40048	0.00892062	Engulfment and cell motility, ELM domain containing protein. (Os03t0322800-01);Similar to predicted protein. (Os03t0322800-02)
Os03g0844000	1.39935	0.0217236	Pentatricopeptide repeat domain containing protein. (Os03t0844000-01);Hypothetical conserved gene. (Os03t0844000-02)
Os03g0448700	1.39834	3.8e-05	Interferon-related developmental regulator domain containing protein. (Os03t0448700-01)
Os03g0363900	1.39817	7.66e-05	Zinc finger, DHHC-type domain containing protein. (Os03t0363900-01);Zinc finger, DHHC-type domain containing protein. (Os03t0363900-02)
Os03g0223900	1.39414	0.0044812	UDP-3-O-acyl N-acetylglucosamine deacetylase domain containing protein. (Os03t0223900-01)
Os01g0958400	1.39204	0.00434532	Similar to CFM6. (Os01t0958400-01);Similar to CFM6. (Os01t0958400-02);RNA-binding, CRM domain domain containing protein. (Os01t0958400-03)
Os04g0532100	1.38776	0.0055704	Short-chain dehydrogenase/reductase SDR domain containing protein. (Os04t0532100-01)
Os05g0566200	1.38488	0.00306387	NLI interacting factor domain containing protein. (Os05t0566200-01)
Os02g0822200	1.3845	0.000945022	Peptidase C12, ubiquitin carboxyl-terminal hydrolase 1 family protein. (Os02t0822200-01);Similar to UCH2; ubiquitin thiolesterase/ ubiquitin-specific protease. (Os02t0822200-02)
Os07g0660466	1.38441	0.0371319	Hypothetical protein. (Os07t0660466-00)
Os12g0613200	1.38404	0.00686452	Hypothetical conserved gene. (Os12t0613200-01);Similar to Histone-lysine N-methyltransferase, H3 lysine-4 specific SET1 (EC 2.1.1.43) (Set1/Ash2 histone methyltransferase complex subunit SET1) (SET-domain-containing protein 1). (Os12t0613200-02);Hypothetical conserved gene. (Os12t0613200-03)
Os03g0594400	1.38012	0.000272043	Monosaccharide transporter 2. (Os03t0594400-01)
Os04g0194433	1.37723	0.0459379	Hypothetical gene. (Os04t0194433-01)
Os04g0455900	1.37664	9.1e-05	Protein of unknown function DUF1692 domain containing protein. (Os04t0455900-01);Similar to H0523F07.5 protein. (Os04t0455900-02)
Os08g0511800	1.37657	0.0170782	Conserved hypothetical protein. (Os08t0511800-01)
Os02g0550600	1.37154	0.000218019	Plant neutral invertase family protein. (Os02t0550600-01)
Os01g0783500	1.36823	0.0050349	Rossmann-like alpha/beta/alpha sandwich fold domain containing protein. (Os01t0783500-01)
Os02g0136150	1.36639	0.0275725	Hypothetical gene. (Os02t0136150-00)
Os05g0297900	1.36585	0.0001026	Similar to Signal peptidase 18 subunit (Fragment). (Os05t0297900-01)
Os08g0516000	1.36559	0.000362447	Conserved hypothetical protein. (Os08t0516000-01)
Os02g0173200	1.36286	0.00937748	VQ domain containing protein. (Os02t0173200-01)
Os01g0774200	1.36244	0.0437796	FBD domain containing protein. (Os01t0774200-01)
Os12g0165000	1.36239	5.51e-05	WD40 repeat-like domain containing protein. (Os12t0165000-01);Similar to predicted protein. (Os12t0165000-02)
Os03g0271400	1.36184	0.000310038	Armadillo-like helical domain containing protein. (Os03t0271400-01)
Os09g0261100	1.36167	0.0315552	Cyclin-like F-box domain containing protein. (Os09t0261100-01)
Os03g0107800	1.36159	3.24e-05	Similar to Starch excess 4. (Os03t0107800-01);Hypothetical conserved gene. (Os03t0107800-02)
Os02g0578800	1.36158	0.000183686	Protein of unknown function DUF962 family protein. (Os02t0578800-01)
Os03g0681300	1.3594	7.75e-05	Similar to SABRE. (Os03t0681300-01)
Os03g0387100	1.35698	4.69e-06	Proteasome alpha 2 subunit, Thermotolerance (Os03t0387100-01)
Os03g0816000	1.35468	0.001172	Hypothetical conserved gene. (Os03t0816000-01)
Os06g0367100	1.35454	0.00535344	Glycoside hydrolase, subgroup, catalytic core domain containing protein. (Os06t0367100-01);Similar to starch branching enzyme III. (Os06t0367100-02)
Os02g0679500	1.35413	0.000787913	Similar to Rac GTPase activating protein 1. (Os02t0679500-01)
Os04g0549600	1.35264	3.52e-06	Chaperone DnaJ protein, Negative regulation of rice innate immunity, Basal resistance to Magnaporthe oryzae (Os04t0549600-01);Similar to OSIGBa0134H18.3 protein. (Os04t0549600-02)
Os03g0796800	1.35051	0.000146665	Similar to guanylate-binding family protein. (Os03t0796800-00)
Os08g0323600	1.35031	0.000831318	Hypothetical conserved gene. (Os08t0323600-01);Ribonuclease E and G domain containing protein. (Os08t0323600-02);Similar to Ribonuclease E. (Os08t0323600-03)
Os03g0626600	1.34949	0.000106505	Zinc finger, LIM-type domain containing protein. (Os03t0626600-01)
Os11g0108932	1.34919	0.00186301	Similar to Leucine Rich Repeat family protein, expressed. (Os11t0108932-01)
Os08g0378000	1.34836	0.0346333	Conserved hypothetical protein. (Os08t0378000-02);Hypothetical protein. (Os08t0378000-03)
Os01g0623500	1.34827	0.000307869	ATPase, AAA-type, core domain containing protein. (Os01t0623500-01)
Os02g0745000	1.34757	1.83e-05	ATPase, anion-transporting domain containing protein. (Os02t0745000-01)
Os03g0108800	1.34691	0.0118054	Similar to Cyclin-dependent kinase A-1. (Os03t0108800-01)
Os08g0522400	1.34684	0.0480458	Similar to APX6; L-ascorbate peroxidase/ heme binding / peroxidase. (Os08t0522400-01)
Os02g0833200	1.34598	0.044155	Hypothetical conserved gene. (Os02t0833200-01)
Os12g0129700	1.34478	0.0019886	Cyclin-like F-box domain containing protein. (Os12t0129700-01)
Os03g0245100	1.34361	0.00319584	NAD(P)-binding domain containing protein. (Os03t0245100-01);Similar to Dihydrodipicolinate reductase. (Os03t0245100-02);NAD(P)-binding domain containing protein. (Os03t0245100-03)
Os11g0276300	1.34339	0.000479722	Uncharacterised protein family, carbohydrate kinase-related domain containing protein. (Os11t0276300-01)
Os06g0116800	1.34337	4.89e-06	Similar to GFA2. (Os06t0116800-01);Similar to GFA2. (Os06t0116800-02)
Os02g0146600	1.34319	5.74e-06	Similar to Eukaryotic initiation factor 4A (eIF4A) (eIF-4A). (Os02t0146600-01)
Os09g0573200	1.34191	0.00928005	Hypothetical conserved gene. (Os09t0573200-01);Protein of unknown function DUF3550/UPF0682 domain containing protein. (Os09t0573200-02);Similar to predicted protein. (Os09t0573200-03)
Os06g0219800	1.3415	2.79e-05	Similar to Protein phosphatase 2A, regulatory subunit B' (PP2A, subunit B', PR53 isoform) (Phosphotyrosyl phosphatase activator) (PTPA). Splice isoform 3. (Os06t0219800-01)
Os10g0370100	1.34066	0.00902886	NB-ARC domain containing protein. (Os10t0370100-01);Similar to NB-ARC domain containing protein, expressed. (Os10t0370100-02)
Os03g0843600	1.34053	0.000492346	Ion channel DMI1.,Cation channen protein. (Os03t0843600-01)
Os10g0401000	1.33966	0.0120445	Conserved hypothetical protein. (Os10t0401000-01)
Os05g0178900	1.3388	3.04e-05	PRP38 family protein. (Os05t0178900-01);PRP38 family protein. (Os05t0178900-02)
Os03g0411800	1.33839	0.0223361	Similar to Metal transport protein. (Os03t0411800-01)
Os01g0585600	1.33801	0.00023142	Protein of unknown function DUF632 domain containing protein. (Os01t0585600-01);Hypothetical conserved gene. (Os01t0585600-02);Similar to proline-rich family protein. (Os01t0585600-03)
Os04g0416400	1.33793	0.0206114	Similar to OSIGBa0092M08.6 protein. (Os04t0416400-01)
Os06g0662200	1.33781	0.000515346	Basic leucine zipper (bZIP) transcription factor, Negative regulator of cold and drought stress response (Os06t0662200-01)
Os03g0815100	1.33597	0.00484938	Similar to OsNAC6 protein. (Os03t0815100-01)
Os04g0560700	1.33585	4.35e-05	Conserved hypothetical protein. (Os04t0560700-01)
Os02g0469200	1.33558	5.03e-05	Conserved hypothetical protein. (Os02t0469200-01);Similar to predicted protein. (Os02t0469200-02)
Os11g0147200	1.3355	0.0145173	Hypothetical conserved gene. (Os11t0147200-00)
Os01g0840100	1.33313	0.000280845	Heat shock protein Hsp70 family protein. (Os01t0840100-01)
Os07g0669250	1.33264	0.0285225	Similar to predicted protein. (Os07t0669250-00)
Os05g0499500	1.33255	3.5e-05	Similar to predicted protein. (Os05t0499500-01)
Os01g0876500	1.33165	0.00263361	Nucleotide-binding, alpha-beta plait domain containing protein. (Os01t0876500-01);Conserved hypothetical protein. (Os01t0876500-02)
Os09g0547300	1.33156	0.000203153	Protein of unknown function DUF632 domain containing protein. (Os09t0547300-01);Domain of unknown function DUF632 domain containing protein. (Os09t0547300-02)
Os03g0367900	1.3304	0.000248973	Peptidase C15, pyroglutamyl peptidase I family protein. (Os03t0367900-01);Peptidase C15, pyroglutamyl peptidase I family protein. (Os03t0367900-02)
Os05g0465100	1.32919	0.000375679	RabGAP/TBC domain containing protein. (Os05t0465100-01)
Os06g0105900	1.32836	8.05e-06	Conserved hypothetical protein. (Os06t0105900-01);Similar to cDNA clone:J023132J12, full insert sequence. (Os06t0105900-02)
Os08g0170800	1.32787	0.0072255	Conserved hypothetical protein. (Os08t0170800-01)
Os06g0144600	1.32574	0.000175764	Similar to Zinc carboxy peptidase. (Os06t0144600-01)
Os11g0576400	1.32408	0.0119439	Similar to HAT family dimerisation domain containing protein, expressed. (Os11t0576400-00)
Os06g0182500	1.32315	0.000672085	Zinc finger, LIM-type domain containing protein. (Os06t0182500-01);Zinc finger, LIM-type domain containing protein. (Os06t0182500-02)
Os04g0162701	1.32189	0.0472594	Hypothetical gene. (Os04t0162701-00)
Os01g0752500	1.32092	0.00603892	APETELA2/ethylene response factor (AP2/ERF) type transcription factor, Negative regulation of disease resistance, Negative regulation of salt tolerance (Os01t0752500-01)
Os02g0537500	1.32052	0.00636408	Similar to E2F homolog. (Os02t0537500-01)
Os11g0539700	1.32038	0.0206418	F-box domain, cyclin-like domain containing protein. (Os11t0539700-00)
Os10g0520400	1.31854	0.0167654	Protein of unknown function DUF295 family protein. (Os10t0520400-00)
Os03g0247000	1.31815	0.000253888	Clp, N-terminal domain containing protein. (Os03t0247000-01)
Os08g0474600	1.31756	0.000359433	Heat shock protein DnaJ, N-terminal domain containing protein. (Os08t0474600-01)
Os03g0189600	1.31721	0.00369597	Similar to Alcohol dehydrogenase. (Os03t0189600-01);Similar to Alcohol dehydrogenase. (Os03t0189600-02)
Os01g0686100	1.31669	0.00231708	Hypothetical conserved gene. (Os01t0686100-01);Hypothetical conserved gene. (Os01t0686100-02)
Os06g0199100	1.31581	0.00221867	Helix-turn-helix, AraC type, subdomain 2 domain containing protein. (Os06t0199100-01)
Os01g0549200	1.31492	0.000540298	Hypothetical conserved gene. (Os01t0549200-01);ATPase-like, ATP-binding domain domain containing protein. (Os01t0549200-02);Hypothetical conserved gene. (Os01t0549200-03)
Os03g0225600	1.31415	0.000315166	Conserved oligomeric complex COG6 family protein. (Os03t0225600-01)
Os10g0485400	1.31376	0.011905	Hypothetical gene. (Os10t0485400-01)
Os03g0848300	1.3135	7.92e-05	Similar to Actin-related protein 2/3 complex subunit 4 (ARP2/3 complex 20 kDa subunit) (p20-ARC). (Os03t0848300-01);Similar to actin-related protein 2/3 complex subunit 4. (Os03t0848300-02)
Os08g0165300	1.31328	0.0178839	Conserved hypothetical protein. (Os08t0165300-01)
Os01g0711500	1.31302	0.0190517	Similar to Calcineurin B-like protein 10. (Os01t0711500-00)
Os08g0556000	1.31262	5.76e-05	Similar to YTH domain protein 2 (High-glucose-regulated protein 8) (NY-REN-2 antigen) (CLL-associated antigen KW-14). (Os08t0556000-01);Similar to predicted protein. (Os08t0556000-02)
Os07g0258800	1.31165	0.0493004	Conserved hypothetical protein. (Os07t0258800-00)
Os06g0136700	1.30967	0.000126685	Steroid nuclear receptor, ligand-binding domain containing protein. (Os06t0136700-01)
Os12g0210300	1.30849	0.000912667	Similar to Glutathione S-transferase GST 18 (EC 2.5.1.18). (Os12t0210300-01)
Os02g0216500	1.30788	0.000406369	Non-protein coding transcript. (Os02t0216500-01);Similar to cDNA clone:002-145-A11, full insert sequence. (Os02t0216500-02);Hypothetical protein. (Os02t0216500-03)
Os12g0209700	1.30778	2.25e-05	Hypothetical conserved gene. (Os12t0209700-01)
Os09g0527100	1.30744	0.000236483	Similar to RNA-binding protein. (Os09t0527100-01);Hypothetical conserved gene. (Os09t0527100-02)
Os10g0145100	1.30658	0.0104756	Cyclin-like F-box domain containing protein. (Os10t0145100-01);Hypothetical conserved gene. (Os10t0145100-02)
Os01g0121800	1.30493	0.00169774	Glycosyl transferase, family 14 protein. (Os01t0121800-01);Similar to xylosyltransferase 1. (Os01t0121800-02)
Os02g0803225	1.30473	0.00259286	Hypothetical protein. (Os02t0803225-00)
Os01g0204000	1.304	0.000842942	DNA polymerase subunit Cdc27 domain containing protein. (Os01t0204000-01);Hypothetical conserved gene. (Os01t0204000-02)
Os01g0911200	1.30398	1.71e-05	Ribophorin II family protein. (Os01t0911200-01)
Os02g0793300	1.30233	0.000126235	Similar to Nudix hydrolase 3 (EC 3.6.1.-) (AtNUDT3). Splice isoform 2. (Os02t0793300-01)
Os02g0241100	1.30153	0.015176	Protein kinase, core domain containing protein. (Os02t0241100-01)
Os11g0153300	1.30082	0.0148706	Conserved hypothetical protein. (Os11t0153300-01);Conserved hypothetical protein. (Os11t0153300-02)
Os03g0711400	1.30074	0.000307438	Similar to Coatomer alpha subunit. (Os03t0711400-01);Similar to cDNA clone:J023075G08, full insert sequence. (Os03t0711400-02)
Os08g0406700	1.30067	0.0442961	Hypothetical protein. (Os08t0406700-01)
Os07g0631700	1.29652	0.0173028	EF-Hand type domain containing protein. (Os07t0631700-01)
Os01g0971700	1.29456	0.000236763	Streptomyces cyclase/dehydrase family protein. (Os01t0971700-01)
Os05g0562300	1.29392	0.0108541	Similar to DnaJ-like protein. (Os05t0562300-01)
Os04g0450200	1.29294	0.0256008	Pentatricopeptide repeat containing protein. (Os04t0450200-01)
Os03g0582200	1.29252	0.00145283	SCAMP family protein. (Os03t0582200-01);SCAMP family protein. (Os03t0582200-02)
Os07g0264900	1.29241	0.000479722	Similar to FAD binding protein. (Os07t0264900-01)
Os08g0503200	1.29222	0.00177082	PLC-like phosphodiesterase, TIM beta/alpha-barrel domain domain containing protein. (Os08t0503200-01)
Os09g0553100	1.29148	8.28e-06	Similar to Histone H4. (Os09t0553100-00)
Os02g0520750	1.29012	0.0063402	Similar to H0209H04.3 protein. (Os02t0520750-01)
Os10g0382300	1.28974	0.000191841	Similar to Signal peptide containing large protein with proline stretches. (Os10t0382300-01);Similar to Signal peptide containing large protein with proline stretches. (Os10t0382300-02)
Os02g0525100	1.28817	0.000235446	Conserved hypothetical protein. (Os02t0525100-01)
Os12g0136900	1.28757	0.0244725	Similar to Calcium-transporting ATPase 4, plasma membrane-type (EC 3.6.3.8) (Ca(2+)-ATPase isoform 4). (Os12t0136900-00)
Os06g0704900	1.28643	9.09e-05	Similar to Cell division-like protein. (Os06t0704900-01)
Os08g0540100	1.2851	0.000270857	Similar to Biotin synthase (EC 2.8.1.6) (Biotin synthetase). (Os08t0540100-01);Similar to Biotin synthase (EC 2.8.1.6) (Biotin synthetase). (Os08t0540100-02)
Os01g0934300	1.28214	0.0029256	Similar to Flowering-time protein isoform alpha. (Os01t0934300-01);Similar to Flowering-time protein isoform alpha. (Os01t0934300-02);Similar to Flowering-time protein isoform alpha. (Os01t0934300-03);Similar to Flowering-time protein isoform alpha. (Os01t0934300-04)
Os03g0296700	1.28106	0.00139531	7TM GPCR, rhodopsin-like domain containing protein. (Os03t0296700-01);Non-protein coding transcript. (Os03t0296700-02)
Os03g0686100	1.28084	0.025844	Conserved hypothetical protein. (Os03t0686100-01)
Os01g0178200	1.28083	0.00294072	Similar to integral membrane family protein. (Os01t0178200-00)
Os02g0722800	1.28052	0.000887171	WD40 repeat-like domain containing protein. (Os02t0722800-01);Similar to Peptidase S26A, signal peptidase I; WD40-like. (Os02t0722800-02)
Os03g0115100	1.27847	0.00502701	Mevalonate and galactokinase family protein. (Os03t0115100-01);Similar to GHMP kinase-related. (Os03t0115100-02)
Os03g0170300	1.27829	0.00205873	3-dehydroquinate synthase family protein. (Os03t0170300-01)
Os07g0695800	1.27802	0.000702838	Similar to 2-oxoglutarate dehydrogenase, E1 component. (Os07t0695800-01);Similar to OSIGBa0096P03.7 protein. (Os07t0695800-02)
Os07g0592200	1.27699	7.92e-05	Aspartic protease, Pollen germination and pollen tube growth (Os07t0592200-02);Similar to predicted protein. (Os07t0592200-03)
Os02g0167500	1.27663	2.81e-05	RNA recognition motif domain domain containing protein. (Os02t0167500-01)
Os03g0108700	1.27523	0.00101477	Conserved hypothetical protein. (Os03t0108700-01)
Os05g0561800	1.27439	0.0344752	Hypothetical conserved gene. (Os05t0561800-01)
Os10g0100500	1.27352	0.00583044	Serine/threonine protein kinase-related domain containing protein. (Os10t0100500-01);Similar to predicted protein. (Os10t0100500-02)
Os10g0318000	1.27195	0.00313474	Conserved hypothetical protein. (Os10t0318000-01)
Os09g0286400	1.27144	7.96e-06	Sodium/hydrogen exchanger subfamily protein. (Os09t0286400-01)
Os04g0379500	1.27094	0.000238123	Conserved hypothetical protein. (Os04t0379500-01);Non-protein coding transcript. (Os04t0379500-02)
Os07g0143700	1.27041	0.000357001	Similar to DEAD-Box RNA helicase-like protein. (Os07t0143700-01)
Os07g0176200	1.26844	0.034859	Tesmin/TSO1-like, CXC domain containing protein. (Os07t0176200-01);Similar to Transcription factor CPP. (Os07t0176200-02)
Os10g0542400	1.2681	0.0164979	Expansin/Lol pI family protein. (Os10t0542400-01);Expansin/Lol pI family protein. (Os10t0542400-02)
Os08g0179900	1.26758	0.000134245	Uncharacterised conserved protein UCP012943 domain containing protein. (Os08t0179900-01)
Os01g0672300	1.2667	0.000183992	Conserved hypothetical protein. (Os01t0672300-01)
Os04g0353000	1.26655	0.00143976	Similar to Cation-transporting ATPase. (Os04t0353000-01)
Os04g0521700	1.26647	0.00730661	Similar to OSIGBa0131L05.9 protein. (Os04t0521700-01)
Os08g0398700	1.26642	0.000391467	Peptidase M1, membrane alanine aminopeptidase family protein. (Os08t0398700-01);Similar to APM1 (AMINOPEPTIDASE M1). (Os08t0398700-02)
Os02g0324200	1.26489	0.00118781	Conserved hypothetical protein. (Os02t0324200-01)
Os11g0311550	1.26431	0.0110855	Similar to dolichol phosphate-mannose biosynthesis regulatory protein-related. (Os11t0311550-00)
Os06g0656500	1.26335	0.0141521	4-coumarate:coenzyme A ligase, Lignin biosynthesis, Defense against wounding (Os06t0656500-01);Similar to cDNA clone:J023002B16, full insert sequence. (Os06t0656500-02)
Os10g0185100	1.2625	0.000660736	Conserved hypothetical protein. (Os10t0185100-01)
Os12g0496900	1.26182	0.00139186	SSXT family protein. (Os12t0496900-01)
Os03g0806400	1.26164	0.00551484	Similar to Elongation factor P family protein, expressed. (Os03t0806400-01)
Os04g0290000	1.2608	0.0042352	Hypothetical conserved gene. (Os04t0290000-01)
Os05g0301500	1.25937	0.000256355	Similar to Ribophorin I (Fragment). (Os05t0301500-01);Similar to dolichyl-diphosphooligosaccharide--protein glycosyltransferase 67 kDasubunit. (Os05t0301500-02);Similar to dolichyl-diphosphooligosaccharide--protein glycosyltransferase 67 kDasubunit. (Os05t0301500-03)
Os03g0432900	1.259	0.000299203	Conserved hypothetical protein. (Os03t0432900-01)
Os04g0429800	1.25879	0.00220635	Similar to Nicotinate phosphoribosyltransferase-like protein. (Os04t0429800-01)
Os01g0580100	1.25862	0.00690553	Alg9-like mannosyltransferase family protein. (Os01t0580100-01);Similar to Dolichyl-phosphate-mannose--glycolipid alpha-mannosyltransferase-like protein. (Os01t0580100-02);Alg9-like mannosyltransferase family protein. (Os01t0580100-03)
Os01g0148100	1.25787	0.000206998	Conserved hypothetical protein. (Os01t0148100-01)
Os06g0319600	1.25523	3.36e-05	Poly(A) polymerase, central domain domain containing protein. (Os06t0319600-01)
Os02g0504500	1.25464	0.000134245	PUG domain containing protein. (Os02t0504500-01);Similar to predicted protein. (Os02t0504500-02)
Os02g0195300	1.25318	8.92e-05	Similar to dnaJ subfamily C member 7. (Os02t0195300-01)
Os01g0956700	1.25263	0.00400317	Cadmium tolerance and accumulation (Os01t0956700-01)
Os09g0563300	1.25194	0.000954871	Similar to GroEL-like chaperone, ATPase. (Os09t0563300-01);Alpha subunit of chaperonin protein 60, Chloroplast development at early leaf stage (Os09t0563300-02)
Os01g0131800	1.25178	4.06e-05	Signal peptidase 22 kDa subunit family protein. (Os01t0131800-01)
Os03g0794200	1.2517	0.0341659	Similar to N-acetyltransferase. (Os03t0794200-00)
Os09g0560900	1.25147	0.000189457	Zinc finger, C2H2-like domain containing protein. (Os09t0560900-01)
Os04g0166300	1.25128	0.000796714	Hypothetical gene. (Os04t0166300-01)
Os05g0541700	1.2495	0.000262703	Protein of unknown function DUF1639 domain containing protein. (Os05t0541700-01)
Os02g0523500	1.24933	0.000176054	Similar to 110 kDa 4SNc-Tudor domain protein (Fragment). (Os02t0523500-01);Similar to RNA binding protein Rp120. (Os02t0523500-02)
Os03g0293400	1.2492	0.0377203	Similar to basic helix-loop-helix family protein. (Os03t0293400-01)
Os12g0267400	1.2491	0.0468147	Hypothetical protein. (Os12t0267400-01)
Os12g0230100	1.24856	4.47e-05	Similar to ATP-dependent Clp protease ATP-binding subunit clpA homolog, chloroplast precursor (Fragment). (Os12t0230100-01)
Os05g0539500	1.24816	0.00125514	Esterase/lipase/thioesterase domain containing protein. (Os05t0539500-01)
Os05g0392100	1.24705	1.25e-05	Similar to glycine-rich protein. (Os05t0392100-01)
Os01g0767700	1.24617	0.000203153	Similar to DEIH-box RNA/DNA helicase. (Os01t0767700-01);Similar to predicted protein. (Os01t0767700-02);Similar to predicted protein. (Os01t0767700-03)
Os09g0464000	1.24614	0.00258717	Similar to Carbonate dehydratase-like protein. (Os09t0464000-01);Similar to Carbonate dehydratase-like protein. (Os09t0464000-02)
Os01g0674100	1.24596	0.000204514	Similar to ATP binding protein. (Os01t0674100-01);Protein kinase, core domain containing protein. (Os01t0674100-02);Similar to ATP binding protein. (Os01t0674100-03)
Os02g0608200	1.24582	6.17e-06	Conserved hypothetical protein. (Os02t0608200-01)
Os03g0347200	1.2455	2.12e-05	Armadillo-type fold domain containing protein. (Os03t0347200-01);Similar to Nuclear cap-binding protein CBP80. (Os03t0347200-02);Similar to Nuclear cap-binding protein CBP80. (Os03t0347200-03)
Os04g0604600	1.24484	0.00035607	Similar to OSIGBa0118P15.10 protein. (Os04t0604600-01)
Os01g0931400	1.24349	0.00151691	Similar to thiamin pyrophosphokinase 1. (Os01t0931400-01);Thiamin pyrophosphokinase, eukaryotic domain containing protein. (Os01t0931400-02)
Os02g0545000	1.24316	0.00184352	Similar to Myosin. (Os02t0545000-01)
Os11g0296500	1.24263	0.00029313	Zinc finger, CCHC retroviral-type domain containing protein. (Os11t0296500-01)
Os03g0754800	1.24119	0.000392564	Mitochondrial substrate carrier family protein. (Os03t0754800-01)
Os07g0291100	1.24084	0.000112154	Transport protein particle (TRAPP) component domain containing protein. (Os07t0291100-01);Similar to cDNA clone:J013066M10, full insert sequence. (Os07t0291100-02)
Os06g0101000	1.23961	2.54e-05	Zinc finger, PHD-type domain containing protein. (Os06t0101000-01)
Os02g0779500	1.2396	0.00144845	Conserved hypothetical protein. (Os02t0779500-01)
Os01g0661500	1.23922	0.00404844	Mov34/MPN/PAD-1 family protein. (Os01t0661500-01)
Os01g0900200	1.23862	0.0416968	Lipase, class 3 domain containing protein. (Os01t0900200-01)
Os03g0153000	1.23808	2.7e-05	Similar to cDNA clone:001-019-C07, full insert sequence. (Os03t0153000-00)
Os04g0433200	1.23784	5.74e-05	Similar to H0315E07.10 protein. (Os04t0433200-01)
Os05g0519600	1.23741	0.0100956	Similar to 4-methyl-5(B-hydroxyethyl)-thiazol monophosphate biosynthesis enzyme. (Os05t0519600-01);Hypothetical conserved gene. (Os05t0519600-02)
Os04g0489900	1.23737	0.03724	Conserved hypothetical protein. (Os04t0489900-01)
Os02g0102900	1.23689	0.000141327	Similar to RuBisCO subunit binding-protein beta subunit, chloroplast (60 kDa chaperonin beta subunit) (CPN-60 beta) (Fragment). (Os02t0102900-01)
Os04g0271200	1.23493	0.00116068	Protein-tyrosine phosphatase-like, PTPLA domain containing protein. (Os04t0271200-01)
Os08g0461000	1.23447	0.000465273	Cyclin-like F-box domain containing protein. (Os08t0461000-01)
Os07g0195100	1.23445	0.00114486	Similar to Ras-related protein ARA-3. (Os07t0195100-01);Similar to Ras-related protein ARA-3. (Os07t0195100-02)
Os04g0413200	1.2336	0.0139432	Similar to Cell wall invertase (EC 3.2.1.26). (Os04t0413200-01)
Os06g0253100	1.23335	0.017645	Heat shock protein Hsp20 domain containing protein. (Os06t0253100-01)
Os11g0109933	1.23249	0.000440529	Component of TORC1(Target of rapamycin complex 1), Modulation of thylakoid membrane biosynthesis and thylakoid grana modeling (Os11t0109933-01);Similar to Transducin/WD-40 repeat protein (Fragment). (Os11t0109933-02)
Os08g0337100	1.23153	0.00876111	Conserved hypothetical protein. (Os08t0337100-01)
Os05g0120800	1.23128	0.0127541	Protein of unknown function DUF2870 domain containing protein. (Os05t0120800-01)
Os01g0391100	1.23072	0.00437682	Hypothetical gene. (Os01t0391100-01);Hypothetical protein. (Os01t0391100-02);Hypothetical protein. (Os01t0391100-03)
Os09g0417600	1.23036	0.0482093	WRKY transcription factor, Transcriptional repressor, Pathogen defense (Os09t0417600-01);WRKY transcription factor 76. (Os09t0417600-02);Splicing variant of OsWRKY76, Pathogen defense (Os09t0417600-03);Splicing variant of OsWRKY76, Pathogen defense (Os09t0417600-04)
Os03g0337700	1.22987	0.00146429	Protein of unknown function, ATP binding family protein. (Os03t0337700-01)
Os07g0194000	1.2292	4.67e-05	Similar to Vesicle-associated membrane protein 725 (AtVAMP725). (Os07t0194000-01)
Os01g0214300	1.22776	0.000259198	Conserved hypothetical protein. (Os01t0214300-01)
Os05g0486200	1.22577	8.37e-05	Protein of unknown function KRTCAP2 domain containing protein. (Os05t0486200-01)
Os07g0614600	1.22543	0.0247032	Transmembrane receptor, eukaryota domain containing protein. (Os07t0614600-01)
Os05g0106100	1.22464	2.1e-05	Similar to Vacuolar ATP synthase 16 kDa proteolipid subunit (EC 3.6.3.14) (V- ATPase 16 kDa proteolipid subunit) (Fragment). (Os05t0106100-01)
Os08g0384000	1.2246	0.00248883	Cytochrome b561 family protein. (Os08t0384000-01)
Os02g0199900	1.22201	3.25e-05	Similar to 26S proteasome regulatory complex subunit p42D. (Os02t0199900-01);Similar to 26S protease regulatory subunit S10B. (Os02t0199900-02);Similar to 26S protease regulatory subunit S10B. (Os02t0199900-03)
Os06g0295366	1.2213	0.0139038	Hypothetical gene. (Os06t0295366-01)
Os09g0242800	1.22043	0.00124872	Zinc finger, RING/FYVE/PHD-type domain containing protein. (Os09t0242800-01)
Os01g0802100	1.2193	0.000278099	Similar to 4-diphosphocytidyl-2-C-methyl-D-erythritol kinase, chloroplast precursor (EC 2.7.1.148) (CMK) (4-(cytidine-5'-diphospho)-2-C-methyl- D-erythritol kinase) (CDPMEK). (Os01t0802100-01)
Os02g0664200	1.21873	1.32e-05	Similar to UDP-glucose:glycoprotein glucosyltransferase 1 precursor (EC 2.4.1.-) (UDP-glucose ceramide glucosyltransferase-like 1) (UDP-- Glc:glycoprotein glucosyltransferase) (HUGT1). (Os02t0664200-01)
Os03g0254400	1.21798	0.00346092	Patatin-related phospholipase A, Modulation of longitudinal growth of vegetative tissues and seeds (Os03t0254400-01);Similar to patatin-like protein 3. (Os03t0254400-02)
Os05g0196500	1.21794	2.4e-05	H3K4-specific demethylase, JmjC domain-containing protein, Control of stem elongation, Control of transposon activity, Panicle development (Os05t0196500-01)
Os02g0606000	1.21776	5.22e-05	Glycine-rich protein (GRP), Regulation of chloroplast development at early leaf stage (Os02t0606000-01)
Os04g0659500	1.21728	0.014708	Protein phosphatase 2C domain containing protein. (Os04t0659500-01);Similar to OSIGBa0132E09-OSIGBa0108L24.16 protein. (Os04t0659500-02)
Os12g0184167	1.217	0.00895455	Conserved hypothetical protein. (Os12t0184167-01)
Os05g0207900	1.21676	3.2e-05	Peptidase C48, SUMO/Sentrin/Ubl1 domain containing protein. (Os05t0207900-01);Hypothetical conserved gene. (Os05t0207900-02)
Os01g0103600	1.21653	0.000374698	Similar to sterol-8,7-isomerase. (Os01t0103600-01);Emopamil-binding family protein. (Os01t0103600-02)
Os03g0766000	1.21468	0.000145154	Similar to seven transmembrane domain protein. (Os03t0766000-01)
Os04g0679800	1.21418	0.000166676	Similar to RNA-binding protein-like protein. (Os04t0679800-01);Similar to Zinc finger, RING-type. (Os04t0679800-02)
Os07g0452700	1.21358	5.18e-05	Hypothetical conserved gene. (Os07t0452700-01);Conserved hypothetical protein. (Os07t0452700-02);Hypothetical conserved gene. (Os07t0452700-03)
Os08g0107300	1.21322	0.00298206	Pectin lyase fold/virulence factor domain containing protein. (Os08t0107300-00)
Os08g0182400	1.21185	4.27e-05	Conserved hypothetical protein. (Os08t0182400-01)
Os05g0421750	1.21151	0.00993234	Similar to Glutamate decarboxylase. (Os05t0421750-00)
Os08g0416400	1.21027	8.76e-05	Nucleotide-binding, alpha-beta plait domain containing protein. (Os08t0416400-01);Similar to RNA binding motif protein. (Os08t0416400-02)
Os04g0128300	1.20939	0.000497067	Conserved hypothetical protein. (Os04t0128300-01)
Os02g0265900	1.20868	0.000390409	Reticulon family protein. (Os02t0265900-01);Hypothetical conserved gene. (Os02t0265900-02);Reticulon family protein. (Os02t0265900-03);Similar to Reticulon. (Os02t0265900-04)
Os03g0351300	1.20844	0.00274083	Similar to beta-amylase. (Os03t0351300-00)
Os10g0135500	1.20774	0.011	Cyclin-like F-box domain containing protein. (Os10t0135500-01)
Os01g0364000	1.20747	0.0169312	Hypothetical gene. (Os01t0364000-01);Hypothetical gene. (Os01t0364000-02)
Os03g0616300	1.20739	0.00367711	Similar to DNA polymerase kappa (EC 2.7.7.7) (DINB protein) (DINP). Splice isoform 4. (Os03t0616300-01);Similar to F2J10.13 protein. (Os03t0616300-02)
Os03g0845800	1.2068	0.00527485	Conserved hypothetical protein. (Os03t0845800-01);Conserved hypothetical protein. (Os03t0845800-02)
Os09g0284200	1.20677	0.000255699	Similar to Serine/threonine protein phosphatase PP-X isozyme 2 (EC 3.1.3.16). (Os09t0284200-01);Similar to Serine/threonine protein phosphatase. (Os09t0284200-02)
Os02g0491400	1.20648	1.67e-05	Similar to Peptidylprolyl isomerase. (Os02t0491400-01)
Os02g0773800	1.20594	0.0427164	Conserved hypothetical protein. (Os02t0773800-01);Hypothetical conserved gene. (Os02t0773800-02)
Os05g0540000	1.20586	0.00527439	EXTL2, alpha-1,4-N-acetylhexosaminyltransferase domain containing protein. (Os05t0540000-01)
Os01g0184800	1.20487	0.00147054	Thioredoxin fold domain containing protein. (Os01t0184800-01)
Os07g0186400	1.2042	1.38e-05	Similar to SHL1. (Os07t0186400-01)
Os02g0773732	1.20383	0.0390896	Hypothetical conserved gene. (Os02t0773732-01)
Os02g0690200	1.20253	0.000330329	Conserved hypothetical protein. (Os02t0690200-01)
Os08g0545300	1.2025	0.00861721	Similar to NAD-dependent sorbitol dehydrogenase. (Os08t0545300-01)
Os02g0817200	1.20243	0.0032618	WD-40 repeat containing protein. (Os02t0817200-01);Similar to actin-related protein 2/3 complex subunit 1B. (Os02t0817200-02)
Os04g0653100	1.20222	0.000102054	Uncharacterised protein family UPF0136, Transmembrane domain containing protein. (Os04t0653100-01)
Os10g0369600	1.20212	7.68e-05	Similar to GRAS transcription factor (Fragment). (Os10t0369600-01)
Os08g0557700	1.2019	0.000508302	Histidine phosphotransfer protein, Cytokinin signaling and stress response (Os08t0557700-01)
Os03g0226600	1.20125	0.00104911	Similar to cDNA clone:J023007A11, full insert sequence. (Os03t0226600-01);Hypothetical conserved gene. (Os03t0226600-02)
Os06g0602800	1.20108	0.00221828	Similar to Acetylglucosaminyltransferase. (Os06t0602800-01)
Os03g0281600	1.20053	0.000471118	Similar to Ca2+-ATPase. (Os03t0281600-01);Similar to Ca2+-ATPase (Fragment). (Os03t0281600-02)
Os03g0377300	1.20039	0.000537406	Conserved hypothetical protein. (Os03t0377300-01)
Os12g0203000	1.20024	0.0169816	Similar to Cyclin-dependent protein kinase-like protein. (Os12t0203000-01)
Os03g0421400	1.19999	0.00124595	Similar to band 7 family protein. (Os03t0421400-01);Similar to band 7 family protein. (Os03t0421400-02)
Os03g0597450	1.19973	0.00539748	Hypothetical conserved gene. (Os03t0597450-01)
Os01g0958000	1.1994	0.000165302	Similar to Cell division control protein 2 homolog 2 (EC 2.7.1.37) (Fragment). (Os01t0958000-01);Similar to Cyclin-dependent kinase C-2. (Os01t0958000-02)
Os05g0453700	1.19922	0.0081492	Similar to USP family protein. (Os05t0453700-01);Similar to ENOD18 protein (Fragment). (Os05t0453700-02)
Os09g0516900	1.19827	4.73e-05	C2 calcium-dependent membrane targeting domain containing protein. (Os09t0516900-01);Similar to GRAM domain containing protein. (Os09t0516900-02)
Os08g0504400	1.19824	0.0113575	Similar to uncharacterized enzyme involved in pigment biosynthesis. (Os08t0504400-01);Similar to Uncharacterized enzyme involved in pigment biosynthesis. (Os08t0504400-02)
Os08g0113200	1.19814	0.000474738	RNA-processing protein, HAT helix domain containing protein. (Os08t0113200-01)
Os12g0142600	1.1979	0.00461557	DTW domain containing protein. (Os12t0142600-01)
Os02g0720500	1.19771	0.0424158	Peptidase A1 domain containing protein. (Os02t0720500-01)
Os01g0885600	1.19768	0.00427282	Alpha/beta hydrolase fold-1 domain containing protein. (Os01t0885600-01)
Os02g0564000	1.19767	1.28e-05	Similar to Glutathione S-transferase. (Os02t0564000-01)
Os03g0825700	1.19763	0.00026085	Ca<sup>2+</sup> binding protein, Regulation of tapetal cell degradation and pollen formation (Os03t0825700-01)
Os06g0731100	1.19743	0.0227763	Zinc finger, PHD-type domain containing protein. (Os06t0731100-00)
Os12g0174000	1.19648	0.000463259	Conserved hypothetical protein. (Os12t0174000-01)
Os07g0134700	1.1953	0.00369437	Mitochodrial transcription termination factor-related family protein. (Os07t0134700-00)
Os04g0395600	1.19465	0.000184702	Similar to TRANSPORT INHIBITOR RESPONSE 1 protein (F-box/LRR-repeat protein 1). (Os04t0395600-01);Similar to TRANSPORT INHIBITOR RESPONSE 1 protein (F-box/LRR-repeat protein 1). (Os04t0395600-02);Similar to AFB2 (AUXIN SIGNALING F-BOX 2); auxin binding / ubiquitin-protein ligase. (Os04t0395600-03)
Os03g0346800	1.19416	0.00322074	Similar to metal tolerance protein. (Os03t0346800-00)
Os07g0122400	1.19409	6.36e-05	Tetratricopeptide region domain containing protein. (Os07t0122400-01)
Os06g0526700	1.19372	0.0153028	Probable protein phosphatase 2C 55. (Os06t0526700-00)
Os10g0563200	1.19363	3.94e-05	Armadillo-like helical domain containing protein. (Os10t0563200-01)
Os01g0913400	1.19257	0.0300607	Nucleotide-binding, alpha-beta plait domain containing protein. (Os01t0913400-01);Hypothetical conserved gene. (Os01t0913400-02)
Os08g0472600	1.1923	0.00028447	Alpha1,3-fucosyltransferase, Basipetal auxin transport, Gravitropic response, N-glycan biosynthesis (Os08t0472600-01)
Os01g0927600	1.19213	7.27e-05	Similar to Auxin response factor 2 (ARF1-binding protein) (ARF1-BP). (Os01t0927600-01)
Os03g0664700	1.19153	0.00123038	RNA polymerase II accessory factor, Cdc73 domain containing protein. (Os03t0664700-01)
Os03g0213400	1.18965	0.000138206	Similar to RNA helicase. (Os03t0213400-01);Similar to cDNA clone:J013093D24, full insert sequence. (Os03t0213400-02)
Os01g0777101	1.18913	0.000693958	Hypothetical gene. (Os01t0777101-00)
Os03g0657100	1.18904	0.020178	Armadillo-like helical domain containing protein. (Os03t0657100-01);Similar to predicted protein. (Os03t0657100-02)
Os05g0403600	1.18884	0.0114597	Mitochodrial transcription termination factor-related family protein. (Os05t0403600-01)
Os07g0507600	1.18863	6.47e-05	Protein of unknown function DUF1723 domain containing protein. (Os07t0507600-01)
Os03g0136500	1.18837	0.017953	Similar to protein-methionine-s-oxide reductase. (Os03t0136500-01)
Os09g0497400	1.18812	0.000254064	Protein of unknown function DUF850, transmembrane eukaryotic family protein. (Os09t0497400-01);Similar to Protein pob. (Os09t0497400-02)
Os06g0609800	1.18805	0.00358127	Conserved hypothetical protein. (Os06t0609800-01);Hypothetical conserved gene. (Os06t0609800-02)
Os01g0646800	1.18729	0.00612676	Conserved hypothetical protein. (Os01t0646800-01)
Os12g0244100	1.18718	2.4e-05	Similar to Heat shock 70 protein. (Os12t0244100-01);Similar to stromal 70 kDa heat shock-related protein. (Os12t0244100-02);Similar to stromal 70 kDa heat shock-related protein. (Os12t0244100-03);Similar to stromal 70 kDa heat shock-related protein. (Os12t0244100-04)
Os11g0175400	1.18679	0.0378437	Plant neutral invertase family protein. (Os11t0175400-01)
Os02g0705300	1.18647	0.0324121	Tubby-like protein 2. (Os02t0705300-01);Similar to cDNA clone:J013000H10, full insert sequence. (Os02t0705300-02);Tubby family protein. (Os02t0705300-03);Similar to cDNA clone:J013000H10, full insert sequence. (Os02t0705300-04)
Os05g0437500	1.18504	0.000488642	Yip1 domain containing protein. (Os05t0437500-01)
Os12g0514500	1.18456	7.09e-06	Similar to Heat-shock protein precursor. (Os12t0514500-01);Similar to ATP binding. (Os12t0514500-02);Similar to ATP binding. (Os12t0514500-03)
Os03g0701700	1.184	0.000250075	Similar to Ethylene receptor. (Os03t0701700-01);Similar to Ethylene receptor. (Os03t0701700-02)
Os02g0324700	1.18357	0.000838851	Similar to senescence-associated protein. (Os02t0324700-01)
Os01g0909500	1.18333	0.000557091	Hypothetical conserved gene. (Os01t0909500-02);Similar to cDNA clone:J013116D08, full insert sequence. (Os01t0909500-03)
Os01g0261500	1.18255	0.00156306	Similar to Nucleoside-diphosphate-sugar epimerase. (Os01t0261500-01);NAD(P)-binding domain containing protein. (Os01t0261500-02);Similar to Nucleoside-diphosphate-sugar epimerase. (Os01t0261500-03)
Os07g0194950	1.18188	0.0205696	Hypothetical gene. (Os07t0194950-01)
Os02g0819200	1.18147	0.000805503	Thioredoxin domain 2 containing protein. (Os02t0819200-01)
Os05g0524400	1.18077	0.000574247	Phosphofructokinase family protein. (Os05t0524400-01);Phosphofructokinase family protein. (Os05t0524400-02)
Os09g0478100	1.18056	0.00826332	Cellulose synthase family protein. (Os09t0478100-01);Similar to Cellulose synthase-like protein E1. (Os09t0478100-02);Similar to Isoform 2 of Cellulose synthase-like protein E1. (Os09t0478100-03)
Os04g0443200	1.17996	0.046289	Protein of unknown function DUF538 family protein. (Os04t0443200-01)
Os03g0802800	1.17969	6.31e-05	Conserved hypothetical protein. (Os03t0802800-01)
Os01g0279300	1.17919	0.000238279	Similar to Calmodulin 1 (Fragment). (Os01t0279300-01)
Os06g0690200	1.17836	0.0451967	Serine/threonine protein kinase-related domain containing protein. (Os06t0690200-01)
Os09g0442300	1.17738	0.0024705	Similar to Oryzain gamma chain (Fragment). (Os09t0442300-01)
Os04g0668900	1.17687	0.0026846	Protein similar to plastid terminal oxidase, Carotenoid and strigolactone synthesis (Os04t0668900-01)
Os01g0518800	1.17616	0.0332566	Conserved hypothetical protein. (Os01t0518800-01)
Os01g0193900	1.17543	0.00260429	Homeodomain-like domain containing protein. (Os01t0193900-01);Hypothetical conserved gene. (Os01t0193900-02)
Os02g0234800	1.17512	4.05e-05	Similar to U2 small nuclear ribonucleoprotein A' (U2 snRNP-A'). (Os02t0234800-01)
Os02g0216700	1.17416	0.0190935	Hypothetical gene. (Os02t0216700-01)
Os02g0435000	1.17403	7.23e-05	Translocation protein Sec62 family protein. (Os02t0435000-01);Translocation protein Sec62 family protein. (Os02t0435000-02)
Os07g0507000	1.17396	0.000649356	Protein phosphatase 2C. (Os07t0507000-01)
Os01g0329800	1.17386	0.00725944	YT521-B-like protein family protein. (Os01t0329800-01);Hypothetical conserved gene. (Os01t0329800-02)
Os08g0447300	1.17362	8.52e-05	Similar to serine esterase family protein. (Os08t0447300-00)
Os01g0605650	1.17281	0.000249246	Zinc finger, C3HC-like domain containing protein. (Os01t0605650-01)
Os05g0180600	1.17175	4.09e-05	Similar to Phosphatidylinositol 3-kinase, root isoform. (Os05t0180600-01);Similar to Phosphatidylinositol 3-kinase, root isoform (EC 2.7.1.137) (PI3- kinase) (PtdIns-3-kinase) (PI3K) (SPI3K-5). (Os05t0180600-02)
Os09g0501850	1.1709	0.000138349	Similar to FK506-binding protein 2-1 precursor (EC 5.2.1.8) (Peptidyl-prolyl cis- trans isomerase) (PPIase) (Rotamase) (15 kDa FKBP) (FKBP-15-1). (Os09t0501850-01)
Os01g0711600	1.17026	0.00167874	Protein of unknown function DUF778 family protein. (Os01t0711600-01)
Os12g0580300	1.16996	0.000152651	Similar to TATA-binding protein TBP2. (Os12t0580300-01)
Os05g0165400	1.16887	0.000165004	GPI-GlcNAc transferase complex, PIG-H component, conserved domain domain containing protein. (Os05t0165400-01)
Os03g0174900	1.16876	0.0236111	Similar to RAPB protein. (Os03t0174900-01)
Os03g0329700	1.1687	0.00876116	Similar to predicted protein. (Os03t0329700-01)
Os08g0424600	1.16762	0.0112544	Hypothetical gene. (Os08t0424600-01)
Os01g0708500	1.16578	0.026002	Similar to lysine decarboxylase-like protein. (Os01t0708500-01);Similar to lysine decarboxylase-like protein. (Os01t0708500-02);Similar to lysine decarboxylase-like protein. (Os01t0708500-03)
Os08g0532900	1.16575	0.00122922	emp24/gp25L/p24 family protein. (Os08t0532900-01);emp24/gp25L/p24 family protein. (Os08t0532900-02)
Os02g0676000	1.16549	1.87e-05	Membrane bound O-acyl transferase, MBOAT family protein. (Os02t0676000-01);Similar to predicted protein. (Os02t0676000-02)
Os09g0530900	1.16435	9.82e-05	Similar to Oxydoreductase-like protein. (Os09t0530900-01)
Os07g0203700	1.16301	6.43e-05	Cleavage and polyadenylation specificity factor, A subunit, C-terminal domain containing protein. (Os07t0203700-01)
Os02g0550900	1.16079	0.0131157	FAR1 DNA binding domain domain containing protein. (Os02t0550900-01);Hypothetical conserved gene. (Os02t0550900-02)
Os09g0487100	1.16	0.00909786	Conserved hypothetical protein. (Os09t0487100-01)
Os09g0249600	1.15965	0.000137663	Similar to small nuclear ribonucleoprotein family protein / snRNP family protein. (Os09t0249600-01);Similar to predicted protein. (Os09t0249600-02)
Os09g0363200	1.15915	0.0347247	Similar to mutator-like transposase [Oryza sativa (japonica cultivar-group)]. (Os09t0363200-01)
Os03g0710900	1.15879	8.76e-05	Similar to CCAAT displacement protein-related / CDP-related. (Os03t0710900-00)
Os04g0500700	1.15803	9.43e-05	Similar to Hydroxyanthranilate hydroxycinnamoyltransferase 3. (Os04t0500700-01);Similar to Hydroxyanthranilate hydroxycinnamoyltransferase 3. (Os04t0500700-02)
Os01g0539400	1.15801	0.000669184	Hypothetical protein. (Os01t0539400-01);Hypothetical protein. (Os01t0539400-02)
Os05g0362500	1.15759	0.00731451	Protein of unknown function DUF538 domain containing protein. (Os05t0362500-01)
Os05g0110700	1.15701	0.00431876	Chromosome segregation protein Spc25 domain containing protein. (Os05t0110700-01)
Os04g0204300	1.15647	0.0412867	Conserved hypothetical protein. (Os04t0204300-01);Hypothetical protein. (Os04t0204300-02)
Os08g0295300	1.15638	0.000149356	Similar to Threonyl-tRNA synthetase, cytoplasmic (EC 6.1.1.3) (Threonine--tRNA ligase) (ThrRS). (Os08t0295300-01);Similar to Threonyl-tRNA synthetase (Fragment). (Os08t0295300-02)
Os10g0501300	1.15632	0.00169766	Pentatricopeptide repeat domain containing protein. (Os10t0501300-01)
Os07g0639600	1.15616	6.21e-05	Peptidase C15, pyroglutamyl peptidase I family protein. (Os07t0639600-01)
Os03g0636600	1.15558	0.00270393	Hypothetical conserved gene. (Os03t0636600-01);Hypothetical conserved gene. (Os03t0636600-02)
Os10g0494800	1.15542	0.000119301	Similar to Katanin p80 WD40-containing subunit B1 (Katanin p80 subunit B1) (p80 katanin). (Os10t0494800-01)
Os04g0244500	1.1543	0.00046238	Protein of unknown function DUF171 family protein. (Os04t0244500-01)
Os05g0374000	1.1536	0.00500467	Hypothetical protein. (Os05t0374000-01)
Os06g0102900	1.1523	0.00170174	Conserved hypothetical protein. (Os06t0102900-01)
Os03g0135400	1.15144	0.00434906	Cyclin-like F-box domain containing protein. (Os03t0135400-01)
Os07g0435100	1.15098	0.000101268	Similar to 26S proteasome subunit RPN12. (Os07t0435100-01)
Os03g0428000	1.15031	0.0312628	Conserved hypothetical protein. (Os03t0428000-01);Conserved hypothetical protein. (Os03t0428000-02)
Os11g0135900	1.14956	0.0345517	Major facilitator superfamily protein. (Os11t0135900-01);Similar to carbohydrate transporter/ sugar porter/ transporter. (Os11t0135900-02)
Os03g0341200	1.14891	0.00206651	Conserved hypothetical protein. (Os03t0341200-00)
Os05g0478200	1.14845	0.00191225	Conserved hypothetical protein. (Os05t0478200-01)
Os06g0530300	1.14843	4.54e-05	Similar to uncharacterized BCR, COG1963 family protein. (Os06t0530300-01)
Os12g0597200	1.14732	0.00114654	Similar to MATH domain containing protein, expressed. (Os12t0597200-01)
Os04g0693250	1.14724	0.000112608	Conserved hypothetical protein. (Os04t0693250-01);Conserved hypothetical protein. (Os04t0693250-02)
Os11g0660400	1.14675	0.000536613	Hypothetical protein. (Os11t0660400-01);Similar to Plasma membrane H+-ATPase. (Os11t0660400-02)
Os01g0684200	1.14645	0.000774082	Conserved hypothetical protein. (Os01t0684200-01)
Os01g0911100	1.14615	3.42e-05	Similar to DEAD box RNA helicase1. (Os01t0911100-01);Similar to DEAD box RNA helicase1. (Os01t0911100-02)
Os04g0446700	1.14474	0.000602386	Hypothetical protein. (Os04t0446700-01)
Os05g0546800	1.14471	4.99e-05	Protein of unknown function DUF3615 domain containing protein. (Os05t0546800-01)
Os11g0582100	1.14458	0.00301928	Zinc finger, RING/FYVE/PHD-type domain containing protein. (Os11t0582100-01)
Os07g0258100	1.14455	0.0095451	Conserved hypothetical protein. (Os07t0258100-01)
Os11g0546200	1.14442	0.00351906	Armadillo-like helical domain containing protein. (Os11t0546200-01)
Os03g0568900	1.14417	5.87e-05	Similar to Purple acid phosphatase. (Os03t0568900-01)
Os05g0133100	1.14379	6.23e-05	Similar to PII protein (Fragment). (Os05t0133100-01)
Os09g0569100	1.1431	0.00062467	Haloacid dehalogenase-like hydrolase domain containing protein. (Os09t0569100-01)
Os12g0561200	1.14246	7.03e-05	Similar to PAPA-1-like conserved region family protein, expressed. (Os12t0561200-01);Zinc finger, HIT-type domain containing protein. (Os12t0561200-02)
Os02g0496500	1.142	0.000258073	HhH-GPD domain domain containing protein. (Os02t0496500-01)
Os05g0436400	1.14097	0.000891271	Similar to signal peptide peptidase family protein. (Os05t0436400-01);Hypothetical gene. (Os05t0436400-02);Similar to signal peptide peptidase family protein. (Os05t0436400-03)
Os08g0558100	1.14053	0.000321814	EF hand domain containing protein. (Os08t0558100-01)
Os11g0444900	1.14051	0.0100618	Octicosapeptide/Phox/Bem1p domain containing protein. (Os11t0444900-01)
Os09g0397300	1.14049	0.000702526	HAD-superfamily hydrolase subfamily IIB protein. (Os09t0397300-01)
Os05g0230600	1.14023	2.41e-05	DUF1620-containing and WD40-like repeat protein, Scaffold protein for assembly of the restoration of fertility complex (Os05t0230600-01);Similar to predicted protein. (Os05t0230600-02)
Os06g0222400	1.13796	0.0030418	Similar to DRE-binding protein 2. (Os06t0222400-01)
Os12g0512100	1.1379	0.0112903	Sugar/inositol transporter domain containing protein. (Os12t0512100-01)
Os06g0176600	1.13758	0.00530705	Hypothetical conserved gene. (Os06t0176600-01)
Os06g0178400	1.13753	0.00530925	Hypothetical conserved gene. (Os06t0178400-01)
Os12g0507600	1.13718	0.00674742	Conserved hypothetical protein. (Os12t0507600-01);Hypothetical conserved gene. (Os12t0507600-02)
Os06g0551400	1.13677	0.00070773	Ras-related small GTP-binding protein, Regulation of vesicular trafficking from trans-Golgi network to plasma membrane or vacuole, Jasmonic acid (JA)-mediated defense signaling (Os06t0551400-01)
Os09g0517700	1.13618	0.00057046	Thioesterase superfamily domain containing protein. (Os09t0517700-01)
Os03g0738300	1.13615	8.9e-05	Hypothetical protein. (Os03t0738300-01)
Os12g0443800	1.13571	0.0248809	Hypothetical conserved gene. (Os12t0443800-01);Similar to ATP binding / ATPase/ nucleoside-triphosphatase/ nucleotide binding. (Os12t0443800-02)
Os03g0424200	1.13529	0.00196864	Serine/threonine protein kinase-related domain containing protein. (Os03t0424200-01)
Os07g0564700	1.13522	0.000133735	Similar to ATMIN7 (ARABIDOPSIS THALIANA HOPM INTERACTOR 7); guanyl-nucleotide exchange factor/ protein binding. (Os07t0564700-01)
Os12g0566200	1.13453	0.00046446	Conserved hypothetical protein. (Os12t0566200-01)
Os01g0753200	1.13433	0.00441177	Similar to DNA binding protein. (Os01t0753200-01)
Os08g0270500	1.1338	0.0440248	Conserved hypothetical protein. (Os08t0270500-01);Conserved hypothetical protein. (Os08t0270500-02)
Os03g0152800	1.13356	0.00758858	Conserved hypothetical protein. (Os03t0152800-01);Hypothetical conserved gene. (Os03t0152800-02);Similar to predicted protein. (Os03t0152800-03)
Os02g0230100	1.13338	0.000870528	Leucine-rich repeat, SDS22 containing protein. (Os02t0230100-01)
Os07g0586500	1.1333	0.000224427	Similar to predicted protein. (Os07t0586500-01);Similar to SUMO activating enzyme 2. (Os07t0586500-02)
Os03g0722100	1.133	8.77e-05	SANT, eukarya domain containing protein. (Os03t0722100-01)
Os10g0204300	1.13195	0.00305366	Similar to Phosphoenolpyruvate carboxykinase. (Os10t0204300-01)
Os12g0175700	1.13022	0.000131747	Nonaspanin (TM9SF) family protein. (Os12t0175700-01)
Os08g0474700	1.1297	4.41e-05	Similar to COPII subunit Sec23 (Fragment). (Os08t0474700-01)
Os06g0139700	1.12962	0.000150944	Protein of unknown function DUF2052, coiled-coil domain containing protein. (Os06t0139700-01)
Os03g0798200	1.12939	0.000684916	Zinc finger, RING/FYVE/PHD-type domain containing protein. (Os03t0798200-01)
Os01g0205600	1.12814	0.0106223	Crotonase, core domain containing protein. (Os01t0205600-01)
Os11g0170300	1.12803	0.00957906	Similar to CBS domain containing protein. (Os11t0170300-01)
Os02g0694400	1.12793	0.0022126	Conserved hypothetical protein. (Os02t0694400-01);Conserved hypothetical protein. (Os02t0694400-02)
Os04g0455401	1.12766	0.0030514	Similar to OSIGBa0093K19.10 protein. (Os04t0455401-01);Similar to OSIGBa0093K19.10 protein. (Os04t0455401-02);Hypothetical conserved gene. (Os04t0455401-03)
Os12g0553600	1.12721	0.000451303	Similar to NB-ARC domain containing protein. (Os12t0553600-01)
Os03g0262100	1.12584	0.000203592	Exon junction complex, Pym domain containing protein. (Os03t0262100-01)
Os03g0151100	1.12474	0.015161	Appr-1-p processing domain containing protein. (Os03t0151100-01)
Os09g0498100	1.12323	0.000222423	Similar to 30S ribosomal protein S16. (Os09t0498100-01)
Os08g0453766	1.12295	0.00339682	Hypothetical gene. (Os08t0453766-01)
Os07g0644300	1.12257	0.000485952	Similar to XPA-binding protein 2 (Adapter protein ATH-55). (Os07t0644300-02)
Os12g0640800	1.12256	0.000177191	Similar to Serine/threonine-protein kinase PRP4 homolog (EC 2.7.1.37) (PRP4 pre- mRNA processing factor 4 homolog) (PRP4 kinase). (Os12t0640800-01)
Os05g0169100	1.12252	4.16e-05	Similar to 60S ribosomal protein L10 (QM protein homolog). (Os05t0169100-01);Similar to 60S ribosomal protein L10-2. (Os05t0169100-02)
Os02g0577400	1.12251	0.0165779	Hypothetical protein. (Os02t0577400-01)
Os08g0399600	1.12177	0.0447232	Translation elongation factor EFTs/EF1B domain containing protein. (Os08t0399600-01);Non-protein coding transcript. (Os08t0399600-02);Similar to Elongation factor Ts. (Os08t0399600-03)
Os05g0581800	1.12108	0.000218161	Protein of unknown function DUF1296 family protein. (Os05t0581800-01);Protein of unknown function DUF1296 domain containing protein. (Os05t0581800-02);Hypothetical conserved gene. (Os05t0581800-03)
Os03g0752100	1.12033	0.000255101	Similar to Phytochrome C. (Os03t0752100-01)
Os12g0554000	1.12007	0.000250119	Similar to Splicing factor, arginine/serine-rich 12. (Os12t0554000-01)
Os04g0673400	1.11799	0.00723246	Similar to Uracil-DNA glycosylase. (Os04t0673400-01)
Os02g0223850	1.11789	0.023495	Similar to ESTs AU075609(C63344). (Os02t0223850-01)
Os05g0574300	1.11779	0.00278966	Similar to Histone H2B.2. (Os05t0574300-00)
Os05g0545000	1.11738	0.000576476	Similar to Phosphatidylinositol transfer-like protein IV. (Os05t0545000-01);Similar to Phosphatidylinositol transfer-like protein III. (Os05t0545000-02)
Os12g0556500	1.11619	0.0394807	Calmodulin binding protein-like family protein. (Os12t0556500-01)
Os09g0244900	1.11496	0.0423152	Transport protein particle (TRAPP) component domain containing protein. (Os09t0244900-01);Transport protein particle (TRAPP) component domain containing protein. (Os09t0244900-02);Transport protein particle (TRAPP) component domain containing protein. (Os09t0244900-03);Transport protein particle (TRAPP) component domain containing protein. (Os09t0244900-04)
Os04g0226340	1.11261	0.00592729	Conserved hypothetical protein. (Os04t0226340-00)
Os05g0235300	1.11159	0.000126658	Serine/threonine (Ser/Thr) protein kinase, Modulation of thylakoid membrane lipid biosynthesis, homeostasis (Os05t0235300-01)
Os07g0209500	1.11153	0.0454099	Similar to DNA polymerase. (Os07t0209500-01)
Os02g0220700	1.11105	6.53e-05	Hypothetical conserved gene. (Os02t0220700-01)
Os01g0971900	1.11104	0.0214985	Similar to BPM. (Os01t0971900-01)
Os05g0110900	1.11011	0.0001026	Similar to Protein kinase APK1B, chloroplast precursor (EC 2.7.1.-). (Os05t0110900-01)
Os07g0471000	1.10961	0.0010287	Endoplasmic reticulum (ER) stress sensor, Transducer of ER stress, ER stress response (Os07t0471000-01)
Os10g0134250	1.10715	0.00715602	Hypothetical gene. (Os10t0134250-01)
Os08g0500800	1.10694	0.00182168	WLM domain containing protein. (Os08t0500800-01)
Os06g0210100	1.10649	0.00173255	Similar to Transmembrane emp24 domain-containing protein 10. (Os06t0210100-01)
Os02g0313900	1.10547	0.00174808	Similar to Plasma membrane H+-ATPase. (Os02t0313900-01)
Os09g0406900	1.10482	0.00755042	Hypothetical protein. (Os09t0406900-01);Non-protein coding transcript. (Os09t0406900-02)
Os06g0154900	1.10435	0.0105793	Similar to RING-type E3 ubiquitin ligase. (Os06t0154900-01);Similar to F3F9.7. (Os06t0154900-02)
Os01g0952700	1.10417	0.03724	Metal-dependent hydrolase, composite domain containing protein. (Os01t0952700-01)
Os11g0601700	1.10357	0.0034447	Helix-loop-helix DNA-binding domain containing protein. (Os11t0601700-01)
Os07g0190900	1.10276	0.00164248	Forkhead-associated domain containing protein. (Os07t0190900-01);Hypothetical conserved gene. (Os07t0190900-02)
Os03g0237600	1.10224	0.000520886	Similar to ATMAP65-6; microtubule binding. (Os03t0237600-01);MAP65/ASE1 family protein. (Os03t0237600-02);MAP65/ASE1 family protein. (Os03t0237600-04)
Os01g0527700	1.10186	0.000290495	Protohaem IX farnesyltransferase, mitochondria domain containing protein. (Os01t0527700-01);Protohaem IX farnesyltransferase, mitochondria domain containing protein. (Os01t0527700-02)
Os07g0192300	1.10162	0.000112981	Heat shock protein DnaJ, N-terminal domain containing protein. (Os07t0192300-01)
Os02g0123600	1.10058	0.00276846	Similar to CDP-diacylglycerol--inositol 3-phosphatidyltransferase 1 (EC 2.7.8.11) (Phosphatidylinositol synthase 1) (PtdIns synthase 1) (PI synthase 1) (AtPIS1). (Os02t0123600-01);Similar to CDP-diacylglycerol--inositol 3-phosphatidyltransferase 1 (EC 2.7.8.11) (Phosphatidylinositol synthase 1) (PtdIns synthase 1) (PI synthase 1) (AtPIS1). (Os02t0123600-02)
Os04g0684200	1.09965	0.000107554	Brassinosteroid (BR) signaling kinase, Regulation of BR signaling (Os04t0684200-01)
Os02g0139100	1.09964	0.0365999	Activator of Hsp90 ATPase, N-terminal domain containing protein. (Os02t0139100-01)
Os04g0670400	1.09897	0.00170178	Similar to H0624F09.2 protein. (Os04t0670400-01);Similar to H0624F09.2 protein. (Os04t0670400-02)
Os07g0452500	1.0989	0.00016909	Similar to ORMDL family protein. (Os07t0452500-01);ORMDL family protein. (Os07t0452500-02)
Os01g0646700	1.09875	0.00612817	Similar to OSIGBa0105P02.4 protein. (Os01t0646700-01);Similar to OSIGBa0105P02.4 protein. (Os01t0646700-02);Hypothetical conserved gene. (Os01t0646700-03)
Os10g0566700	1.09823	0.00092802	Chaperonin Cpn10 family protein. (Os10t0566700-00)
Os06g0647700	1.09808	0.0178714	Hypothetical protein. (Os06t0647700-01)
Os10g0430700	1.09795	0.0253582	Conserved hypothetical protein. (Os10t0430700-01)
Os05g0107300	1.09727	9.93e-05	Conserved hypothetical protein. (Os05t0107300-01)
Os02g0313500	1.09699	0.0016811	Conserved hypothetical protein. (Os02t0313500-01)
Os07g0209000	1.09611	0.000246569	Dolichyl-diphosphooligosaccharide-protein glycosyltransferase 48 kDa subunit precursor, N-glycosylation, Root development (Os07t0209000-01);Non-protein coding transcript. (Os07t0209000-02)
Os03g0135550	1.0959	0.0164335	Hypothetical gene. (Os03t0135550-01)
Os01g0883200	1.09579	0.00010095	Conserved hypothetical protein. (Os01t0883200-01)
Os03g0119500	1.09566	0.000583381	Callose synthase, Ovary expansion by affecting vascular cell patterning (Os03t0119500-01)
Os01g0626200	1.09563	0.000430309	Clathrin adaptor, beta-adaptin, appendage, C-terminal subdomain domain containing protein. (Os01t0626200-01)
Os03g0156500	1.09481	1.9e-05	RNA-binding protein Lupus La domain containing protein. (Os03t0156500-01)
Os06g0622900	1.0948	2.21e-05	Similar to RNA-binding region containing protein 1 (HSRNASEB) (ssDNA binding protein SEB4) (CLL-associated antigen KW-5). Splice isoform 2. (Os06t0622900-01)
Os01g0150200	1.0948	0.000846061	Protein-tyrosine phosphatase-like, PTPLA domain containing protein. (Os01t0150200-01);Protein-tyrosine phosphatase-like, PTPLA domain containing protein. (Os01t0150200-02)
Os11g0483900	1.09429	0.0138469	Engulfment and cell motility, ELM domain containing protein. (Os11t0483900-01)
Os11g0448000	1.0938	0.0330137	Protein kinase, catalytic domain domain containing protein. (Os11t0448000-00)
Os10g0502500	1.09355	3.09e-05	Cytochrome b5 domain containing protein. (Os10t0502500-04)
Os04g0663500	1.09349	0.0346817	Similar to OSIGBa0099L20.5 protein. (Os04t0663500-00)
Os02g0114700	1.09346	0.000222726	Similar to Phosphorylation regulatory protein HP-10. (Os02t0114700-01)
Os06g0218200	1.09284	0.000640626	Similar to H0807C06-H0308C08.1 protein. (Os06t0218200-01)
Os01g0819000	1.09248	0.000401832	Similar to transposon protein CACTA, En/Spm sub-class. (Os01t0819000-01);Similar to transposon protein CACTA, En/Spm sub-class. (Os01t0819000-02)
Os02g0634900	1.09233	2.06e-05	Proteasome subunit alpha type 2 (EC 3.4.25.1) (20S proteasome alpha subunit B) (20S proteasome subunit alpha-2). (Os02t0634900-01)
Os02g0735900	1.09193	6.27e-05	Zinc finger, RING/FYVE/PHD-type domain containing protein. (Os02t0735900-01)
Os03g0685750	1.09185	0.000347428	Hypothetical conserved gene. (Os03t0685750-00)
Os02g0615800	1.09178	0.0205709	Protein kinase, core domain containing protein. (Os02t0615800-01);Hypothetical conserved gene. (Os02t0615800-02)
Os04g0129500	1.09144	0.000646976	Gelsolin region domain containing protein. (Os04t0129500-01);Similar to OSIGBa0131J24.5 protein. (Os04t0129500-02);Similar to OSIGBa0131J24.5 protein. (Os04t0129500-03)
Os05g0156800	1.08957	0.000277927	Conserved hypothetical protein. (Os05t0156800-01)
Os01g0660550	1.08925	0.00188717	Conserved hypothetical protein. (Os01t0660550-01)
Os09g0556000	1.08908	0.0026192	Signal peptidase 22 kDa subunit family protein. (Os09t0556000-01)
Os01g0331900	1.08887	0.0141053	Protein of unknown function DUF846, eukaryotic family protein. (Os01t0331900-01);Protein of unknown function DUF846, eukaryotic family protein. (Os01t0331900-02)
Os08g0427100	1.08864	0.00173296	Hypothetical conserved gene. (Os08t0427100-01);Hypothetical protein. (Os08t0427100-02);Hypothetical gene. (Os08t0427100-03)
Os03g0305500	1.08858	0.000209161	Argininosuccinate lyase, Root elongation (Os03t0305500-01);Argininosuccinate lyase, Splicing variant with unknown function (Os03t0305500-02)
Os10g0446400	1.08695	0.0221439	AT-rich interaction region domain containing protein. (Os10t0446400-01);SANT domain, DNA binding domain containing protein. (Os10t0446400-02)
Os01g0766900	1.08575	0.00587797	Hypothetical protein. (Os01t0766900-01)
Os06g0226700	1.08506	0.0331678	Similar to PCF1. (Os06t0226700-01)
Os08g0511700	1.08411	0.00474782	Similar to PSR9 (Fragment). (Os08t0511700-00)
Os04g0409600	1.08394	7.48e-05	Similar to Histone deacetylase. (Os04t0409600-01)
Os01g0708300	1.0836	0.0030755	Protein of unknown function DUF803 domain containing protein. (Os01t0708300-01);Similar to predicted protein. (Os01t0708300-02)
Os11g0572400	1.08293	0.00165231	Similar to ST3GAL-I sialyltransferase (Fragment). (Os11t0572400-01)
Os02g0606800	1.08287	0.0132768	Isochorismatase hydrolase family protein. (Os02t0606800-01)
Os01g0894500	1.08239	0.000296367	Sep15/SelM redox domain containing protein. (Os01t0894500-01)
Os04g0110400	1.08235	0.00426793	Similar to H0201G08.9 protein. (Os04t0110400-01)
Os05g0373000	1.08223	0.000673256	PapD-like domain containing protein. (Os05t0373000-01)
Os04g0626100	1.08199	0.00136785	HMG-I and HMG-Y, DNA-binding domain containing protein. (Os04t0626100-01)
Os03g0810600	1.08171	4.31e-05	Miro-like domain containing protein. (Os03t0810600-01);Similar to ATP/GTP/Ca++ binding protein. (Os03t0810600-02);Similar to predicted protein. (Os03t0810600-03)
Os01g0270100	1.0815	0.000670657	Similar to Cysteine protease inhibitor. (Os01t0270100-01);Similar to cDNA clone:001-200-C04, full insert sequence. (Os01t0270100-02)
Os07g0295800	1.08112	9.17e-05	Similar to peptidase. (Os07t0295800-01)
Os08g0295000	1.08023	0.000253568	Conserved hypothetical protein. (Os08t0295000-01)
Os03g0290500	1.08006	9.41e-05	Synaptojanin, N-terminal domain containing protein. (Os03t0290500-01)
Os10g0483900	1.07917	0.000441093	Twin arginine translocation signal, Tat domain containing protein. (Os10t0483900-01)
Os03g0344300	1.0788	0.000234987	Similar to Ulp1 protease family, C-terminal catalytic domain containing protein, expressed. (Os03t0344300-01);Similar to Ulp1 protease family, C-terminal catalytic domain containing protein, expressed. (Os03t0344300-02)
Os06g0270900	1.07837	0.000553582	Similar to RF2 (EC 1.2.1.3) (T cytoplasm male sterility restorer factor 2). (Os06t0270900-01);Similar to Aldehyde dehydrogenase. (Os06t0270900-02)
Os05g0487300	1.07828	0.00369289	Conserved hypothetical protein. (Os05t0487300-01);Conserved hypothetical protein. (Os05t0487300-02)
Os06g0661900	1.07822	0.00789788	Protein of unknown function DUF266, plant family protein. (Os06t0661900-01)
Os09g0133600	1.07723	0.000184611	Fibrillin-like protein. (Os09t0133600-01);PAP fibrillin family protein. (Os09t0133600-02)
Os09g0511700	1.07638	0.00793671	Similar to Prunasin hydrolase isoform PH C precursor (EC 3.2.1.118). (Os09t0511700-01)
Os01g0752400	1.07514	0.000913721	Hypothetical conserved gene. (Os01t0752400-00)
Os06g0274100	1.07465	0.000101351	Armadillo-like helical domain containing protein. (Os06t0274100-01)
Os12g0116000	1.07451	0.0246499	Similar to PV72. (Os12t0116000-01);Similar to predicted protein. (Os12t0116000-02)
Os06g0494000	1.07434	0.00116626	Paired amphipathic helix domain containing protein. (Os06t0494000-01);Hypothetical conserved gene. (Os06t0494000-02)
Os02g0133300	1.07414	4.09e-05	Similar to SMC3 protein. (Os02t0133300-01)
Os08g0383250	1.07363	0.0260925	Hypothetical conserved gene. (Os08t0383250-01)
Os02g0823000	1.0736	3.63e-05	Peptidase A22B, signal peptide peptidase domain containing protein. (Os02t0823000-01)
Os04g0653400	1.0726	3.36e-05	Similar to NADPH-cytochrome P450 reductase (Fragment). (Os04t0653400-01)
Os06g0151025	1.07245	0.00719175	Hypothetical protein. (Os06t0151025-00)
Os02g0551100	1.07227	0.00660555	Serine/threonine protein kinase, Dehydration-inducible SNF1-related protein kinase 2, Hyperosmotic stress response, Abscisic acid (ABA) signaling (Os02t0551100-01)
Os05g0534800	1.07211	0.00814919	Hypothetical conserved gene. (Os05t0534800-01)
Os02g0831200	1.07202	0.0481148	Protein of unknown function DUF177 family protein. (Os02t0831200-01)
Os10g0544500	1.07183	7.92e-05	WD40 repeat-like domain containing protein. (Os10t0544500-01);Similar to nucleotide binding protein. (Os10t0544500-02)
Os05g0529400	1.07077	0.0398999	Similar to ubiquitin domain containing 1. (Os05t0529400-01);Similar to ubiquitin domain containing 1. (Os05t0529400-02)
Os10g0482000	1.07076	0.00145258	Conserved hypothetical protein. (Os10t0482000-01)
Os05g0160100	1.07075	0.000101914	CT11-RanBPM domain containing protein. (Os05t0160100-01)
Os06g0101300	1.07057	0.00128266	Zinc finger, RING/FYVE/PHD-type domain containing protein. (Os06t0101300-01)
Os01g0310800	1.0703	0.000220387	Similar to Pto kinase interactor 1. (Os01t0310800-01)
Os03g0332700	1.07029	0.000850561	Similar to ABC Transporter, ATP binding component. (Os03t0332700-01)
Os11g0256300	1.06981	0.000201338	Zinc finger, GRF-type domain containing protein. (Os11t0256300-01)
Os01g0120800	1.06972	4.85e-05	Similar to Eukaryotic translation initiation factor 3 subunit 10 (eIF-3 theta) (Eukaryotic translation initiation factor 3 large subunit) (eIF3a). (Os01t0120800-01);Similar to Translation initiation factor 3. (Os01t0120800-02);Similar to Translation initiation factor 3. (Os01t0120800-03);Similar to Translation initiation factor 3. (Os01t0120800-04);Similar to Translation initiation factor 3. (Os0…
Os04g0433800	1.06867	0.0190984	Similar to RECQ4A; ATP binding / ATP-dependent helicase/ helicase/ nucleic acid binding. (Os04t0433800-01)
Os03g0687200	1.06846	0.000974674	Conserved hypothetical protein. (Os03t0687200-01)
Os02g0480900	1.06843	0.000154371	LsmAD domain domain containing protein. (Os02t0480900-01);Hypothetical conserved gene. (Os02t0480900-02);Hypothetical conserved gene. (Os02t0480900-03)
Os05g0140600	1.06767	0.00484622	Tudor-like, plant domain containing protein. (Os05t0140600-01)
Os07g0164600	1.06722	0.00023241	SOH1 family protein. (Os07t0164600-01)
Os06g0708500	1.06685	0.000286233	Similar to Peptidyl-prolyl cis-trans isomerase. (Os06t0708500-01);Similar to Peptidyl-prolyl cis-trans isomerase. (Os06t0708500-02)
Os02g0711100	1.06675	0.00752966	Pentatricopeptide repeat domain containing protein. (Os02t0711100-01)
Os07g0120800	1.06657	0.00221829	Protein of unknown function DUF1719, Oryza sativa family protein. (Os07t0120800-01)
Os06g0239700	1.0662	0.000190186	Conserved hypothetical protein. (Os06t0239700-01)
Os09g0362500	1.06581	0.00183636	Peptidase M1, membrane alanine aminopeptidase family protein. (Os09t0362500-01)
Os07g0681500	1.0658	0.000841187	Ankyrin repeat containing protein. (Os07t0681500-01);Similar to predicted protein. (Os07t0681500-02)
Os07g0161000	1.0654	0.000875686	Tetratricopeptide-like helical domain containing protein. (Os07t0161000-01);Hypothetical conserved gene. (Os07t0161000-02)
Os02g0124700	1.06437	0.00260978	Clathrin, heavy chain/VPS, 7-fold repeat domain containing protein. (Os02t0124700-01)
Os03g0104800	1.0639	0.0289445	Hypothetical conserved gene. (Os03t0104800-01)
Os01g0339900	1.06316	0.00070703	Thioredoxin domain 2 containing protein. (Os01t0339900-01)
Os03g0773300	1.06308	0.025588	Protein kinase, core domain containing protein. (Os03t0773300-01);Similar to wound and phytochrome signaling involved receptor like kinase. (Os03t0773300-02)
Os03g0800800	1.06301	0.00134131	Forkhead-associated domain containing protein. (Os03t0800800-01)
Os05g0427300	1.06283	0.000139423	Similar to RNA binding protein (Fragment). (Os05t0427300-03);Similar to RNA recognition motif-containing protein. (Os05t0427300-04)
Os11g0637501	1.0628	7.38e-05	Similar to membrane protein. (Os11t0637501-00)
Os04g0504800	1.0623	1.62e-05	Similar to Poly(A)-binding protein. (Os04t0504800-01);Similar to polyadenylate-binding protein 2. (Os04t0504800-02);Similar to polyadenylate-binding protein 2. (Os04t0504800-03)
Os11g0664500	1.0617	0.0485742	Hypothetical conserved gene. (Os11t0664500-01)
Os05g0105300	1.06167	0.000528204	CAP-Gly domain containing protein. (Os05t0105300-01)
Os10g0160000	1.06115	2.51e-05	Similar to Ubiquitin carboxyl-terminal hydrolase 12 (EC 3.1.2.15) (Ubiquitin thiolesterase 12) (Ubiquitin-specific processing protease 12) (Deubiquitinating enzyme 12). (Os10t0160000-01);Similar to Ubiquitin carboxyl-terminal hydrolase. (Os10t0160000-02)
Os08g0177550	1.06105	0.0124558	Conserved hypothetical protein. (Os08t0177550-01)
Os07g0617800	1.061	0.000372296	Similar to Alanine aminotransferase. (Os07t0617800-01)
Os03g0392050	1.06037	0.000665627	Oligosaccaryltransferase domain containing protein. (Os03t0392050-01)
Os02g0452500	1.05993	0.000467142	Similar to SNARE-interacting protein KEULE. (Os02t0452500-01)
Os04g0463300	1.05959	0.0498182	Pentatricopeptide repeat containing protein. (Os04t0463300-01)
Os02g0469600	1.05912	0.00187339	Similar to Cysteine proteinase 1 precursor (EC 3.4.22.-). (Os02t0469600-01)
Os11g0240900	1.0591	0.0013385	Protein of unknown function DUF2363 domain containing protein. (Os11t0240900-01)
Os07g0583700	1.05835	0.000344041	WRKY transcription factor 78. (Os07t0583700-01)
Os06g0239000	1.05752	0.000322017	Similar to Glucose-inhibited division protein B-like protein. (Os06t0239000-01)
Os07g0471100	1.05727	0.00063702	SET domain containing protein. (Os07t0471100-01)
Os08g0199000	1.05665	0.00548897	F-box domain, cyclin-like domain containing protein. (Os08t0199000-01)
Os07g0623100	1.05649	4.67e-05	Similar to ER66 protein (Fragment). (Os07t0623100-01)
Os05g0490200	1.05585	0.000311462	Protein of unknown function DUF1692 domain containing protein. (Os05t0490200-01);Similar to serologically defined breast cancer antigen NY-BR-84. (Os05t0490200-02);Similar to cDNA clone:J033072O04, full insert sequence. (Os05t0490200-03)
Os11g0639000	1.05534	0.001621	Similar to Phyb1. (Os11t0639000-00)
Os07g0272400	1.05499	0.000190989	Zinc finger, RING/FYVE/PHD-type domain containing protein. (Os07t0272400-01)
Os02g0767900	1.0548	0.00192425	Glutaredoxin 2 family protein. (Os02t0767900-01)
Os02g0130300	1.05412	0.0398349	Hypothetical conserved gene. (Os02t0130300-01);S-ribonuclease binding protein, SBP1, pollen domain containing protein. (Os02t0130300-02);Hypothetical conserved gene. (Os02t0130300-03)
Os03g0839300	1.05283	0.000208754	Conserved hypothetical protein. (Os03t0839300-01)
Os04g0102500	1.05264	0.000140888	Similar to OSIGBa0123D13.3 protein. (Os04t0102500-01)
Os05g0510200	1.05171	0.023558	Similar to Glycine-rich cell wall structural protein 1.0 precursor (GRP 1.0). (Os05t0510200-01)
Os07g0529800	1.05133	0.000197709	Protein translation factor SUI1 homolog (GOS2 protein). (Os07t0529800-01)
Os11g0170400	1.05052	0.001305	Conserved hypothetical protein. (Os11t0170400-01);Conserved hypothetical protein. (Os11t0170400-02)
Os02g0633400	1.05047	0.000152189	Similar to 61 kDa protein homolog. (Os02t0633400-01)
Os11g0310800	1.05004	0.00186565	DEAD-like helicase, N-terminal domain containing protein. (Os11t0310800-01)
Os06g0704400	1.04983	0.000276595	Transposase, MuDR, plant domain containing protein. (Os06t0704400-01);Transposase, MuDR, plant domain containing protein. (Os06t0704400-02);Similar to cDNA clone:001-132-E04, full insert sequence. (Os06t0704400-03)
Os03g0289100	1.04969	0.000661878	Serine/threonine protein kinase, Carbohydrate metabolism (Os03t0289100-01);Similar to OSK3. (Os03t0289100-02)
Os12g0174800	1.04942	0.00460497	Protein-tyrosine phosphatase, receptor/non-receptor type domain containing protein. (Os12t0174800-01);Protein-tyrosine phosphatase, receptor/non-receptor type domain containing protein. (Os12t0174800-02);Conserved hypothetical protein. (Os12t0174800-03)
Os06g0698859	1.04894	0.000223308	Similar to C2H2 zinc-finger protein SERRATE (Fragment). (Os06t0698859-01)
Os04g0397400	1.0484	0.00097487	Conserved hypothetical protein. (Os04t0397400-01)
Os04g0593700	1.04838	0.0136476	RWD domain domain containing protein. (Os04t0593700-01)
Os04g0596400	1.04818	4.96e-05	Similar to UPF0195 protein CG30152. (Os04t0596400-01)
Os09g0509350	1.04798	0.0152416	Hypothetical protein. (Os09t0509350-00)
Os05g0392300	1.04736	0.00261015	Similar to Cyclin-dependent kinase D-1. (Os05t0392300-01);Similar to Cyclin-dependent kinase D-1. (Os05t0392300-02)
Os03g0809400	1.04662	0.0218791	Hypothetical conserved gene. (Os03t0809400-00)
Os08g0450800	1.04659	3.59e-05	Phosphatidylinositol-4-phosphate 5-kinase family protein. (Os08t0450800-01);Similar to predicted protein. (Os08t0450800-02)
Os03g0169900	1.04611	0.000576476	Pathogenic type III effector avirulence factor Avr cleavage site domain containing protein. (Os03t0169900-01)
Os08g0508600	1.04523	8.15e-05	Similar to Pre-rRNA-processing protein TSR2. (Os08t0508600-01)
Os10g0130701	1.04484	0.0123252	Hypothetical conserved gene. (Os10t0130701-01)
Os01g0592900	1.04457	0.0186229	Similar to regulator of telomere elongation helicase 1. (Os01t0592900-01);Similar to regulator of telomere elongation helicase 1. (Os01t0592900-02)
Os09g0514700	1.04415	0.0175018	Conserved hypothetical protein. (Os09t0514700-01)
Os11g0545000	1.04365	3e-05	NOP5, N-terminal domain containing protein. (Os11t0545000-01);Conserved hypothetical protein. (Os11t0545000-02);NOP5, N-terminal domain containing protein. (Os11t0545000-03)
Os02g0217600	1.04336	0.000542973	Similar to Isoform 2 of Serine/threonine-protein phosphatase PP2A-3 catalytic subunit. (Os02t0217600-01);Similar to Protein phosphatase 2A. (Os02t0217600-02)
Os10g0485100	1.04294	0.00292859	Thioredoxin fold domain containing protein. (Os10t0485100-01);Hypothetical conserved gene. (Os10t0485100-02)
Os01g0772800	1.04241	1.23e-05	Similar to Signal recognition particle 54 kDa protein 2 (SRP54). (Os01t0772800-01)
Os01g0182900	1.04213	0.00240525	Conserved hypothetical protein. (Os01t0182900-01)
Os02g0317800	1.04205	8.88e-05	Similar to pollen Ole e 1 allergen and extensin family protein. (Os02t0317800-01)
Os06g0651300	1.04155	0.0264536	Zinc finger, U1-type domain containing protein. (Os06t0651300-01)
Os01g0521400	1.04123	0.000769971	Similar to lipase family protein. (Os01t0521400-01)
Os03g0185600	1.04022	0.000428721	Conserved hypothetical protein. (Os03t0185600-01)
Os02g0251700	1.03979	0.00319438	Conserved hypothetical protein. (Os02t0251700-01)
Os06g0225200	1.03952	0.00073821	Mitochodrial transcription termination factor-related family protein. (Os06t0225200-01)
Os09g0557400	1.03924	0.0011147	Mitochondrial glycoprotein family protein. (Os09t0557400-01)
Os10g0581000	1.0387	0.000346507	Conserved hypothetical protein. (Os10t0581000-01)
Os12g0299700	1.03803	0.000808182	NOP5, N-terminal domain containing protein. (Os12t0299700-01)
Os04g0443500	1.03798	0.00023526	Similar to Protein phosphatase methylesterase 1 (EC 3.1.1.-) (PME-1). Splice isoform 3. (Os04t0443500-01)
Os07g0158800	1.03764	0.00576153	Protein of unknown function DUF266, plant family protein. (Os07t0158800-01)
Os05g0583100	1.03682	0.000585662	HAT dimerisation domain containing protein. (Os05t0583100-01);Similar to transposon protein. (Os05t0583100-02);Hypothetical conserved gene. (Os05t0583100-03)
Os01g0933200	1.03551	0.00106164	Heavy metal transport/detoxification protein domain containing protein. (Os01t0933200-00)
Os07g0645100	1.03527	0.000175625	Phosphatidylinositol 3- and 4-kinase, catalytic domain containing protein. (Os07t0645100-01)
Os11g0128000	1.03458	0.0159429	Similar to secondary cell wall-related glycosyltransferase family 47. (Os11t0128000-01)
Os03g0812000	1.03437	0.0163164	DNA topoisomerase, type IIA, subunit A or C-terminal domain containing protein. (Os03t0812000-01)
Os09g0530600	1.03433	0.00188717	Zinc finger, CCCH-type domain containing protein. (Os09t0530600-01)
Os07g0600400	1.03424	0.0474702	WD40/YVTN repeat-like domain containing protein. (Os07t0600400-01)
Os04g0517400	1.03352	0.000103418	Similar to Plant glycogenin-like starch initiation protein (Fragment). (Os04t0517400-01)
Os09g0487600	1.03335	0.0133764	Similar to polygalacturonase. (Os09t0487600-01)
Os03g0344700	1.03243	0.000168016	Similar to AAA-type ATPase family protein. (Os03t0344700-01)
Os02g0521700	1.03226	0.000491729	Similar to Thioesterase family protein. (Os02t0521700-01)
Os10g0521600	1.03195	0.000301824	Similar to Ankyrin-1 (Erythrocyte ankyrin). (Os10t0521600-01);Similar to Ankyrin-1 (Erythrocyte ankyrin). (Os10t0521600-02)
Os03g0596900	1.03193	7.83e-05	GTP-binding signal recognition particle SRP54, G-domain containing protein. (Os03t0596900-01);Hypothetical conserved gene. (Os03t0596900-02);Hypothetical conserved gene. (Os03t0596900-03)
Os10g0540100	1.03187	0.0199113	Pentatricopeptide repeat domain containing protein. (Os10t0540100-01)
Os02g0772100	1.03174	0.0170617	Conserved hypothetical protein. (Os02t0772100-01)
Os01g0971200	1.03167	0.00227554	Protein of unknown function DUF707 family protein. (Os01t0971200-01);Similar to Lysine ketoglutarate reductase trans-splicing related 1. (Os01t0971200-02)
Os07g0295200	1.03138	0.000476421	Protein of unknown function DUF167 family protein. (Os07t0295200-01)
Os08g0558600	1.03086	0.000118497	Synaptobrevin domain containing protein. (Os08t0558600-01);Synaptobrevin domain containing protein. (Os08t0558600-02)
Os03g0819900	1.03057	8.24e-05	Similar to RAB8C. (Os03t0819900-01)
Os03g0784800	1.03026	0.000123396	Homo sapiens protein involved in sexual development, complete cds. (Os03t0784800-01);Homo sapiens protein involved in sexual development, complete cds. (Os03t0784800-02)
Os08g0328300	1.02978	0.000103873	ENT domain containing protein. (Os08t0328300-01);ENT domain containing protein. (Os08t0328300-02)
Os02g0581900	1.02971	0.00651673	Similar to Pentatricopeptide repeat protein PPR986-12. (Os02t0581900-01)
Os08g0207600	1.02931	0.0122122	Similar to GTP-binding protein. (Os08t0207600-01);Similar to GTP-binding protein (ERG). (Os08t0207600-02)
Os06g0535300	1.02812	0.000774297	Similar to AFL190Cp. (Os06t0535300-01);Hypothetical conserved gene. (Os06t0535300-02)
Os08g0369300	1.02782	0.0062222	Similar to Actin-related protein 2. (Os08t0369300-00)
Os01g0109700	1.02767	0.000118824	Similar to Paired amphipathic helix repeat-containing protein / transcription regulator-related. (Os01t0109700-01)
Os06g0304500	1.02734	0.0376372	RNA-binding, CRM domain domain containing protein. (Os06t0304500-01)
Os04g0402100	1.02714	0.00327079	Similar to Calnexin (Fragment). (Os04t0402100-01);Similar to calnexin. (Os04t0402100-02)
Os04g0519900	1.02675	0.00149853	Similar to OSIGBa0145G11.5 protein. (Os04t0519900-01)
Os04g0644300	1.02606	9.38e-05	Similar to H0413E07.5 protein. (Os04t0644300-01)
Os01g0847200	1.02541	0.00514992	Similar to Mannose-1-phosphate guanyltransferase (EC 2.7.7.13) (ATP-mannose-1- phosphate guanylyltransferase) (GDP-mannose pyrophosphorylase) (NDP- hexose pyrophosphorylase). (Os01t0847200-01);Similar to Mannose-1-phosphate guanyltransferase (EC 2.7.7.13) (ATP-mannose-1- phosphate guanylyltransferase) (GDP-mannose pyrophosphorylase) (NDP- hexose pyrophosphorylase). (Os01t0847200-02)
Os04g0432200	1.02529	0.000568125	Hypothetical protein. (Os04t0432200-00)
Os11g0226933	1.02524	0.0159568	NB-ARC domain containing protein. (Os11t0226933-01)
Os04g0551300	1.0252	0.00276017	Similar to Growth regulator like protein. (Os04t0551300-01);Similar to OSIGBa0122F23.8 protein. (Os04t0551300-02)
Os12g0403800	1.02484	0.000157198	Similar to Exosome complex exonuclease RRP42. (Os12t0403800-01);Exoribonuclease domain containing protein. (Os12t0403800-02)
Os03g0129200	1.02375	0.00051525	Similar to predicted protein. (Os03t0129200-00)
Os04g0509300	1.02366	0.0410451	Rnase III family protein, Shoot apical meristem (SAM) formation and maintenance (Os04t0509300-01);Rnase III family protein, Trans-acting siRNA3 (ta-siRNA)(TAS3) biogenesis (Os04t0509300-02)
Os03g0333200	1.02314	0.0110809	Receptor-like kinase, Control of reproductive growth and development, Repression of cell death (Os03t0333200-01)
Os08g0338600	1.02304	0.00125131	Conserved hypothetical protein. (Os08t0338600-01)
Os11g0241900	1.02245	0.000301087	Domain of unknown function DUF231, plant domain containing protein. (Os11t0241900-01)
Os08g0357000	1.02195	0.000453136	Similar to Wound responsive protein. (Os08t0357000-01);Similar to wound responsive protein. (Os08t0357000-02)
Os02g0807100	1.02188	0.0154116	Similar to Starch synthase V. (Os02t0807100-01);Hypothetical gene. (Os02t0807100-02);Hypothetical gene. (Os02t0807100-03)
Os07g0570300	1.02135	4.86e-05	Peptidase M16, core domain containing protein. (Os07t0570300-01)
Os07g0417766	1.02064	0.00578493	Hypothetical conserved gene. (Os07t0417766-01)
Os03g0554900	1.02039	0.000737476	Hypothetical conserved gene. (Os03t0554900-00)
Os12g0105800	1.02002	0.015382	Tyrosine protein kinase domain containing protein. (Os12t0105800-01)
Os11g0607200	1.01993	0.000218857	Protein kinase, core domain containing protein. (Os11t0607200-01);Similar to Brassinosteroid insensitive1-associated receptor kinase 1. (Os11t0607200-02)
Os09g0385300	1.01985	0.00297217	Hypothetical protein. (Os09t0385300-01);Hypothetical protein. (Os09t0385300-02)
Os01g0782500	1.01961	0.000167737	Phospholipid/glycerol acyltransferase domain containing protein. (Os01t0782500-01)
Os07g0620500	1.0196	0.000645837	Oligosaccaryltransferase domain containing protein. (Os07t0620500-01)
Os10g0485000	1.01893	0.000285876	FF domain containing protein. (Os10t0485000-01)
Os06g0644800	1.01871	0.00697326	Glucosidase II beta subunit-like domain containing protein. (Os06t0644800-01);Similar to Protein OS-9. (Os06t0644800-02)
Os03g0369800	1.01864	0.000135789	Similar to Novel plant SNARE 13 (AtNPSN13). (Os03t0369800-01)
Os01g0775200	1.01826	0.000230612	Conserved hypothetical protein. (Os01t0775200-01);Conserved hypothetical protein. (Os01t0775200-02);Conserved hypothetical protein. (Os01t0775200-03)
Os04g0467400	1.01824	0.000928438	Similar to Poly(A)-specific ribonuclease PARN (EC 3.1.13.4) (Polyadenylate- specific ribonuclease) (AtPARN). (Os04t0467400-01)
Os06g0247800	1.01801	0.000109947	Similar to Dynamin-like protein (Fragment). (Os06t0247800-01);Non-protein coding transcript. (Os06t0247800-02)
Os11g0114600	1.01768	0.000132045	Similar to cDNA clone:J013107M03, full insert sequence. (Os11t0114600-01);Similar to cDNA clone:J013107M03, full insert sequence. (Os11t0114600-02)
Os10g0502600	1.01767	0.00109549	Cytochrome b5 domain containing protein. (Os10t0502600-01);Similar to Membrane steroid-binding protein 1 (Fragment). (Os10t0502600-02);Cytochrome b5 domain containing protein. (Os10t0502600-03)
Os01g0546900	1.01742	0.0159129	Similar to transcription factor jumonji (jmjC) domain-containing protein. (Os01t0546900-01)
Os08g0549300	1.01728	0.000309246	Similar to Acyl carrier protein III, chloroplast precursor (ACP III). (Os08t0549300-01)
Os01g0838900	1.01672	0.00255964	Trp repressor/replication initiator domain containing protein. (Os01t0838900-01)
Os04g0391500	1.01662	0.00190719	Similar to ACR4. (Os04t0391500-01);Similar to OSIGBa0145N07.1 protein. (Os04t0391500-02)
Os04g0674000	1.01647	0.0112544	Similar to H0403D02.10 protein. (Os04t0674000-01);Similar to H0403D02.10 protein. (Os04t0674000-03)
Os06g0360600	1.01646	0.0193952	Similar to OSIGBa0104J13.3 protein. (Os06t0360600-01);Conserved hypothetical protein. (Os06t0360600-02);Hypothetical conserved gene. (Os06t0360600-03)
Os03g0824400	1.01532	0.000350686	Similar to Dolichol-phosphate mannosyltransferase (EC 2.4.1.83) (Dolichol- phosphate mannose synthase) (Dolichyl-phosphate beta-D- mannosyltransferase) (Mannose-P-dolichol synthase) (MPD synthase) (DPM synthase). (Os03t0824400-01)
Os04g0612900	1.01524	0.00167968	Vacuolar ATPase assembly integral membrane protein VMA21-like domain domain containing protein. (Os04t0612900-01)
Os06g0497600	1.01514	0.0351997	Similar to H0321H01.8 protein. (Os06t0497600-01)
Os02g0286891	1.01506	0.0124497	Similar to OSIGBa0161P06.1 protein. (Os02t0286891-01)
Os03g0136900	1.01492	0.00536212	Similar to Aconitate hydratase, cytoplasmic (EC 4.2.1.3) (Citrate hydro-lyase) (Aconitase). (Os03t0136900-01);Similar to Aconitate hydratase 2, mitochondrial. (Os03t0136900-02)
Os01g0673300	1.01471	0.00615199	Protein of unknown function DUF295 family protein. (Os01t0673300-01)
Os02g0519300	1.01397	0.0436726	Similar to H0112G12.10 protein. (Os02t0519300-01);Similar to H0112G12.10 protein. (Os02t0519300-02)
Os03g0854300	1.01375	0.00752595	Nucleotide-binding, alpha-beta plait domain containing protein. (Os03t0854300-01);Hypothetical conserved gene. (Os03t0854300-02)
Os05g0565500	1.01347	0.0166298	3-hydroxyacid dehydrogenase/reductase domain containing protein. (Os05t0565500-01)
Os10g0580300	1.01237	0.000247338	Serine/threonine protein kinase domain containing protein. (Os10t0580300-01)
Os04g0507500	1.01223	0.00156379	Armadillo-like helical domain containing protein. (Os04t0507500-01);Similar to OSIGBa0157A06.7 protein. (Os04t0507500-02)
Os12g0516700	1.01098	0.00103532	Similar to Splicing factor, arginine/serine-rich 12. (Os12t0516700-01)
Os07g0661500	1.01055	0.000201795	Hypothetical conserved gene. (Os07t0661500-00)
Os03g0321400	1.00997	0.000125061	Protein of unknown function DUF1692 domain containing protein. (Os03t0321400-01)
Os02g0205300	1.00985	5.17e-05	Similar to TAT-binding protein homolog (Fragment). (Os02t0205300-01);Similar to TAT-binding protein homolog (Fragment). (Os02t0205300-02)
Os05g0508700	1.00979	0.00023526	TRAF-type domain containing protein. (Os05t0508700-01);Similar to Math domain containing protein (Fragment). (Os05t0508700-02);Hypothetical conserved gene. (Os05t0508700-03)
Os02g0158400	1.0096	0.00375216	ssDNA-binding transcriptional regulator family protein. (Os02t0158400-01)
Os09g0408600	1.00949	0.00144905	Similar to Dihydrolipoamide S-acetyltransferase (EC 2.3.1.12). (Os09t0408600-01)
Os11g0113200	1.0093	0.00096173	Hypothetical conserved gene. (Os11t0113200-01)
Os01g0382700	1.00819	0.0363476	Similar to stress regulated protein. (Os01t0382700-01);Similar to stress regulated protein. (Os01t0382700-02)
Os01g0549500	1.00739	0.0022585	Phox-like domain containing protein. (Os01t0549500-01);Phox-like domain containing protein. (Os01t0549500-02)
Os03g0848100	1.00603	0.0328054	Similar to Ser/Thr protein phosphatase family protein, expressed. (Os03t0848100-01)
Os02g0577100	1.00587	0.00537948	Zinc finger, RING/FYVE/PHD-type domain containing protein. (Os02t0577100-01)
Os05g0158200	1.00577	0.000138809	Peptidase, trypsin-like serine and cysteine domain containing protein. (Os05t0158200-01)
Os02g0741100	1.00548	0.0364167	Similar to Chaperone protein dnaJ 16 (Protein ARG1-LIKE1) (AtARL1) (AtJ16) (AtDjB16). (Os02t0741100-01);Similar to Chaperone protein dnaJ 16 (Protein ARG1-LIKE1) (AtARL1) (AtJ16) (AtDjB16). (Os02t0741100-02)
Os03g0627300	1.00538	0.00171427	Similar to nucleotide-binding protein-like. (Os03t0627300-01)
Os08g0249400	1.00516	0.000364383	Hypothetical conserved gene. (Os08t0249400-01)
Os01g0356500	1.00508	0.017739	Thiamin pyrophosphokinase, eukaryotic domain containing protein. (Os01t0356500-01)
Os06g0563000	1.00486	0.00407285	Ndr family protein. (Os06t0563000-01)
Os06g0618300	1.00465	0.000516598	Conserved hypothetical protein. (Os06t0618300-01)
Os01g0663800	1.00451	0.000436697	Protein of unknown function DUF1296 family protein. (Os01t0663800-01);Hypothetical conserved gene. (Os01t0663800-02)
Os12g0155300	1.00444	0.00954499	Conserved hypothetical protein. (Os12t0155300-01)
Os01g0687600	1.00427	0.0026673	Similar to Arginine/serine-rich coiled coil protein 1. (Os01t0687600-01)
Os06g0128500	1.00387	0.000959308	Ribosomal protein L47, mitochondrial family protein. (Os06t0128500-01)
Os01g0186700	1.00374	0.000215009	Similar to Protein kinase GhCLK1 (Fragment). (Os01t0186700-01)
Os07g0438550	1.00331	7.38e-05	Similar to salt-inducible protein kinase. (Os07t0438550-01)
Os08g0436000	1.00306	0.00175802	Nucleotide-binding, alpha-beta plait domain containing protein. (Os08t0436000-01);Hypothetical conserved gene. (Os08t0436000-02)
Os08g0100500	1.00306	0.00184826	Regulation of nuclear pre-mRNA protein domain containing protein. (Os08t0100500-01);Conserved hypothetical protein. (Os08t0100500-02);Hypothetical conserved gene. (Os08t0100500-03)
Os06g0255100	1.00303	0.00234323	2OG-Fe(II) oxygenase domain containing protein. (Os06t0255100-01)
Os03g0640100	1.00294	3.64e-05	Similar to WD-40 repeat protein MSI1. (Os03t0640100-01)
Os08g0461300	1.00294	0.0010986	Cyclin-like F-box domain containing protein. (Os08t0461300-01)
Os01g0265900	1.00271	0.0374722	Similar to translin family protein. (Os01t0265900-00)
Os07g0182100	1.0027	0.000548714	Similar to Tryptophan synthase alpha chain. (Os07t0182100-01)
Os10g0151800	1.00255	0.000116215	Similar to predicted protein. (Os10t0151800-01)
Os03g0711800	1.00246	0.000136916	Similar to IRE homolog 1 (Fragment). (Os03t0711800-01);Similar to predicted protein. (Os03t0711800-02);Similar to predicted protein. (Os03t0711800-03)
Os02g0787300	1.00169	0.00842723	Mitogen-activated protein kinase kinase 4, Defense response, Cell proliferation, Grain growth (Os02t0787300-01)
Os08g0460700	1.00168	0.00104139	Leucine-rich repeat 2 containing protein. (Os08t0460700-01)
Os01g0219000	1.00159	0.0244523	Conserved hypothetical protein. (Os01t0219000-00)
Os02g0823800	1.0013	0.000453849	Smg8/Smg9 domain containing protein. (Os02t0823800-01);Hypothetical conserved gene. (Os02t0823800-02)
Os01g0777800	1.0011	0.00119242	Hypothetical conserved gene. (Os01t0777800-01)
Os03g0819700	-1.00033	0.00403476	Conserved hypothetical protein. (Os03t0819700-01)
Os05g0134200	-1.0028	6.09e-05	Similar to Protein phosphatase-2C. (Os05t0134200-01)
Os09g0514600	-1.00413	7.5e-05	Beta-grasp fold, ferredoxin-type domain containing protein. (Os09t0514600-00)
Os05g0302600	-1.00505	0.00405694	TRAM, LAG1 and CLN8 homology domain containing protein. (Os05t0302600-01)
Os11g0157200	-1.00597	0.000715656	Harpin-induced 1 domain containing protein. (Os11t0157200-03)
Os12g0285100	-1.00644	0.000137952	Hypothetical conserved gene. (Os12t0285100-01);Conserved hypothetical protein. (Os12t0285100-02);Conserved hypothetical protein. (Os12t0285100-03);Hypothetical conserved gene. (Os12t0285100-04)
Os09g0361400	-1.0072	0.000174306	Outer mitochondrial membrane protein porin (Voltage-dependent anion- selective channel protein) (VDAC). (Os09t0361400-01);Similar to Mitochondrial outer membrane protein porin. (Os09t0361400-02)
Os06g0320300	-1.00825	0.00589825	HMG-I and HMG-Y, DNA-binding domain containing protein. (Os06t0320300-01);HMG-I and HMG-Y, DNA-binding domain containing protein. (Os06t0320300-02)
Os05g0225500	-1.01032	0.00266847	Hypothetical protein. (Os05t0225500-01)
Os11g0119100	-1.01051	0.0293157	Similar to Catalytic/ hydrolase. (Os11t0119100-01)
Os03g0713400	-1.01147	0.000240054	Similar to NADH-ubiquinone oxidoreductase 75 kDa subunit, mitochondrial precursor (EC 1.6.5.3) (EC 1.6.99.3) (Complex I-75KD) (CI-75KD) (76 kDa mitochondrial complex I subunit). (Os03t0713400-01);Similar to NADH-ubiquinone oxidoreductase 75 kDa subunit. (Os03t0713400-02);Similar to NADH-ubiquinone oxidoreductase 75 kDa subunit. (Os03t0713400-03)
Os11g0485500	-1.01184	0.00218843	Hypothetical protein. (Os11t0485500-01)
Os07g0619200	-1.01224	0.00946999	EF hand domain containing protein. (Os07t0619200-01);Hypothetical gene. (Os07t0619200-02);Similar to EF hand family protein. (Os07t0619200-04)
Os01g0505400	-1.01254	0.0014077	Similar to 2-hydroxyphytanoyl-CoA lyase. (Os01t0505400-01);Similar to 2-hydroxyphytanoyl-CoA lyase. (Os01t0505400-02)
Os10g0437000	-1.01274	0.00415041	Similar to Secondary cell wall-related glycosyltransferase family 14. (Os10t0437000-01);Glycosyl transferase, family 14 protein. (Os10t0437000-02);Similar to Secondary cell wall-related glycosyltransferase family 14. (Os10t0437000-03)
Os12g0135000	-1.01277	0.0330381	Hypothetical conserved gene. (Os12t0135000-01)
Os09g0361300	-1.0128	0.000916449	F-box domain, cyclin-like domain containing protein. (Os09t0361300-01)
Os07g0211900	-1.01446	0.00304812	Protein of unknown function DUF632 domain containing protein. (Os07t0211900-01)
Os11g0148500	-1.0147	1.49e-05	Cytosolic pyruvate kinase, Plant morphological development (Os11t0148500-02)
Os09g0420900	-1.01501	0.0403452	BTB domain containing protein. (Os09t0420900-01)
Os02g0173700	-1.01648	0.0223502	Similar to RNA binding. (Os02t0173700-01)
Os04g0355401	-1.01671	0.00279779	Hypothetical protein. (Os04t0355401-01)
Os04g0598200	-1.0174	0.00065604	Similar to 60S ribosomal protein L12. (Os04t0598200-00)
Os10g0161625	-1.01865	0.00338171	Similar to VAP27. (Os10t0161625-00)
Os08g0266600	-1.0194	0.00456469	WD40/YVTN repeat-like domain containing protein. (Os08t0266600-01)
Os03g0822700	-1.02048	0.00484579	Armadillo-like helical domain containing protein. (Os03t0822700-01);Similar to Armadillo/beta-catenin-like repeat family protein. (Os03t0822700-02)
Os11g0555600	-1.0217	0.00390862	Protein kinase, core domain containing protein. (Os11t0555600-01)
Os01g0739500	-1.02371	0.000181411	Conserved hypothetical protein. (Os01t0739500-01)
Os11g0161000	-1.02391	0.00293351	NB-ARC domain containing protein. (Os11t0161000-01)
Os02g0822000	-1.02394	0.00554792	Conserved hypothetical protein. (Os02t0822000-01);Conserved hypothetical protein. (Os02t0822000-02);Hypothetical conserved gene. (Os02t0822000-03)
Os09g0400000	-1.02432	0.0219938	Cinnamyl alcohol dehydrogenase (EC 1.1.1.195). (Os09t0400000-00)
Os04g0678200	-1.02583	7.82e-05	Protein of unknown function DUF1218 family protein. (Os04t0678200-01)
Os04g0692100	-1.02637	0.00189357	Similar to Tubulin folding cofactor B. (Os04t0692100-01)
Os03g0201000	-1.02755	0.0111921	Conserved hypothetical protein. (Os03t0201000-01)
Os12g0151500	-1.02902	0.0110855	Similar to Alpha-2,8-sialyltransferase 8B (EC 2.4.99.-) (ST8Sia II) (Sialyltransferase X) (STX). (Os12t0151500-01)
Os01g0739700	-1.02937	0.0136092	Glycoside hydrolase, family 17 protein. (Os01t0739700-01)
Os09g0308900	-1.0308	0.00225016	Phosphatidic acid phosphatase type 2/haloperoxidase domain containing protein. (Os09t0308900-01);Similar to Lipid phosphate phosphatase 3. (Os09t0308900-02);Similar to lipid phosphate phosphatase 3. (Os09t0308900-03)
Os08g0463100	-1.0328	0.0488317	Conserved hypothetical protein. (Os08t0463100-01)
Os02g0644600	-1.0329	0.00184569	Pentatricopeptide repeat domain containing protein. (Os02t0644600-01)
Os07g0265100	-1.03411	0.0104672	Conserved hypothetical protein. (Os07t0265100-01)
Os02g0124866	-1.03453	0.0214625	Hypothetical gene. (Os02t0124866-01)
Os01g0321700	-1.03668	0.00558699	Similar to predicted protein. (Os01t0321700-01);Similar to predicted protein. (Os01t0321700-02)
Os07g0189700	-1.03697	0.0302238	Similar to JHL07K02.7 protein. (Os07t0189700-01)
Os08g0408500	-1.03721	0.0091422	Pathogenesis-related transcriptional factor and ERF domain containing protein. (Os08t0408500-01)
Os01g0242500	-1.03749	0.00267672	D-tyrosyl-tRNA(Tyr) deacylase family protein. (Os01t0242500-01)
Os02g0186900	-1.03754	0.0328598	Cytochrome P450 family protein. (Os02t0186900-01)
Os05g0458100	-1.03969	0.000250574	Similar to FK506-binding protein 4 (EC 5.2.1.8) (Peptidyl-prolyl cis-trans isomerase) (PPIase) (Rotamase) (p59 protein) (HSP binding immunophilin) (HBI) (FKBP52 protein) (52 kDa FK506 binding protein) (FKBP59). (Os05t0458100-01)
Os01g0140400	-1.04127	0.0256212	Similar to leucine-rich repeat protein-related. (Os01t0140400-01);Leucine-rich repeat, N-terminal domain containing protein. (Os01t0140400-02)
Os12g0160100	-1.04131	0.00763033	Conserved hypothetical protein. (Os12t0160100-01)
Os07g0202300	-1.0434	0.000777462	Similar to Mitosis protein dim1. (Os07t0202300-01)
Os12g0576100	-1.04661	0.0153029	Conserved hypothetical protein. (Os12t0576100-00)
Os05g0318700	-1.04678	0.0032378	Similar to Resistance protein candidate (Fragment). (Os05t0318700-01);Similar to Resistance protein candidate (Fragment). (Os05t0318700-02)
Os04g0539500	-1.04742	0.00129607	Similar to H0115B09.1 protein. (Os04t0539500-01);Similar to H0115B09.1 protein. (Os04t0539500-02)
Os01g0822800	-1.04843	0.00721147	Similar to RING-H2 finger protein ATL3C. (Os01t0822800-01)
Os04g0430700	-1.04947	0.0236111	Peptidase S8, subtilisin-related domain containing protein. (Os04t0430700-01)
Os04g0669200	-1.05031	0.00268295	Similar to Ethylene response factor 2 (Ethylene response factor 3). (Os04t0669200-01)
Os11g0607100	-1.05116	0.033154	Pentatricopeptide repeat domain containing protein. (Os11t0607100-01)
Os01g0182600	-1.05344	0.014154	GIGANTEA protein. (Os01t0182600-01);GIGANTEA protein. (Os01t0182600-03)
Os10g0112600	-1.05346	0.00380334	Nonaspanin (TM9SF) family protein. (Os10t0112600-01)
Os01g0974701	-1.05362	0.0260001	Similar to RNA-binding glycine rich protein (RGP-2). (Os01t0974701-01)
Os05g0147300	-1.0537	0.0212987	Similar to calcium ion binding protein. (Os05t0147300-00)
Os01g0111300	-1.05399	0.0494899	Conserved hypothetical protein. (Os01t0111300-01)
Os07g0479600	-1.05536	0.000133532	Conserved hypothetical protein. (Os07t0479600-01)
Os08g0561700	-1.05778	0.00287341	Similar to Superoxide dismutase. (Os08t0561700-01)
Os02g0728401	-1.06108	0.00264103	Hypothetical gene. (Os02t0728401-01)
Os04g0675200	-1.06138	0.0350064	Similar to H0103C06.6 protein. (Os04t0675200-01)
Os11g0526200	-1.06192	0.00175495	Similar to predicted protein. (Os11t0526200-01)
Os04g0306750	-1.06338	0.0165218	Similar to OSIGBa0096F13.8 protein. (Os04t0306750-01)
Os09g0516600	-1.06405	3.46e-05	Glyoxalase II. (Os09t0516600-01);Glyoxalase II. (Os09t0516600-02)
Os12g0476200	-1.06416	0.0401306	Sucrose transporter, TAL effector PthXo2-dependent disease susceptibility to bacterial pathogen (Os12t0476200-01)
Os07g0584500	-1.06594	0.00830642	Nucleotide-binding, alpha-beta plait domain containing protein. (Os07t0584500-01);Nucleotide-binding, alpha-beta plait domain containing protein. (Os07t0584500-02)
Os01g0666400	-1.06624	0.00250135	Similar to predicted protein. (Os01t0666400-01)
Os07g0691800	-1.06625	0.0191492	Similar to 26S proteasome subunit 4-like protein (26S proteasome subunit AtRPT2a). (Os07t0691800-01);Similar to 26S protease regulatory subunit 4 homolog. (Os07t0691800-02);Non-protein coding transcript. (Os07t0691800-03)
Os06g0119800	-1.06675	0.000374514	Conserved hypothetical protein. (Os06t0119800-00)
Os07g0583200	-1.06703	0.000840368	Mitochodrial transcription termination factor-related family protein. (Os07t0583200-01)
Os03g0741400	-1.06758	0.0025807	Similar to SUSIBA2. (Os03t0741400-01)
Os09g0533600	-1.06851	0.0174413	Similar to Avr9/Cf-9 induced kinase 1. (Os09t0533600-01)
Os02g0702400	-1.06864	0.0448835	Pectinacetylesterase family protein. (Os02t0702400-01)
Os10g0378300	-1.0691	0.0302344	Similar to Truncated copper-binding protein CUTA. (Os10t0378300-01);Similar to Protein CutA 1, chloroplastic. (Os10t0378300-02)
Os04g0487100	-1.06978	0.0166171	Galactose oxidase/kelch, beta-propeller domain containing protein. (Os04t0487100-01)
Os08g0161900	-1.07014	0.00142374	Molecular chaperone, heat shock protein, Hsp40, DnaJ domain containing protein. (Os08t0161900-01)
Os01g0936800	-1.07104	0.000695497	PapD-like domain containing protein. (Os01t0936800-01);Similar to VAP27-2. (Os01t0936800-02)
Os07g0165200	-1.07151	0.0343899	Ankyrin domain containing protein. (Os07t0165200-01)
Os06g0564300	-1.07181	0.007391	Conserved hypothetical protein. (Os06t0564300-01)
Os04g0347800	-1.075	0.0360718	Similar to OSIGBa0130K07.4 protein. (Os04t0347800-01)
Os09g0454100	-1.0754	0.00428491	Peptidase S54, rhomboid domain containing protein. (Os09t0454100-01)
Os03g0794500	-1.07552	0.00583936	Similar to Glutamate dehydrogenase (EC 1.4.1.3) (GDH). (Os03t0794500-01)
Os06g0607000	-1.07641	0.00216249	Similar to Beta-1,3-glucanase. (Os06t0607000-01)
Os11g0684100	-1.07861	0.0235637	NB-ARC domain containing protein. (Os11t0684100-01);NB-ARC domain containing protein. (Os11t0684100-02)
Os09g0339601	-1.07906	0.000713648	Hypothetical gene. (Os09t0339601-01)
Os12g0515500	-1.07982	0.0163477	Similar to Zn-finger transcription factor. (Os12t0515500-01)
Os05g0311000	-1.08142	0.0268003	Clathrin adaptor, mu subunit, C-terminal domain containing protein. (Os05t0311000-01);Similar to delta-COP. (Os05t0311000-02)
Os05g0421300	-1.08284	0.0232577	Armadillo-type fold domain containing protein. (Os05t0421300-01);Similar to predicted protein. (Os05t0421300-02)
Os04g0638300	-1.08317	0.0294659	Hypothetical protein. (Os04t0638300-01)
Os06g0318300	-1.08443	0.0268114	Similar to Rho GDP dissociation inhibitor 2 (Fragment). (Os06t0318300-01);Similar to Rho GDP-dissociation inhibitor 1 (Rho GDI-1) (AtRhoGDI1). (Os06t0318300-02)
Os01g0912600	-1.0854	0.00820781	Similar to SRD2 (SHOOT REDIFFERENTIATION DEFECTIVE 2); DNA binding. (Os01t0912600-01)
Os03g0279400	-1.08627	0.0124632	Similar to predicted protein. (Os03t0279400-01);Similar to Arginine biosynthesis bifunctional protein argJ 1 [Includes: Glutamate N-acetyltransferase (EC 2.3.1.35) (Ornithine acetyltransferase) (Ornithine transacetylase) (OATase); Amino-acid acetyltransferase (EC 2.3.1.1) (N-acetylglutamate synthase) (AGS)] [Contains: Arginine biosynthesis bifunctional protein argJ1 alpha chain; Arginine biosynth…
Os08g0248800	-1.08776	0.0404694	Similar to Aspartate carbamoyltransferase 3, chloroplast precursor (EC 2.1.3.2) (Aspartate transcarbamylase 3) (ATCase 3). (Os08t0248800-01)
Os08g0154900	-1.08874	0.0403536	Pleckstrin homology-type domain containing protein. (Os08t0154900-00)
Os03g0773100	-1.08919	0.00331142	Similar to Myb/SANT domain protein. (Os03t0773100-01)
Os08g0424500	-1.09001	0.000260902	Betaine aldehyde dehydrogenase, Rice fragrance (Os08t0424500-01);Similar to Betaine aldehyde dehydrogenase. (Os08t0424500-02)
Os10g0478200	-1.09554	0.000134981	Cytoplasmic malate dehydrogenase. (Os10t0478200-01)
Os07g0617100	-1.09627	0.00782819	Plant disease resistance response protein family protein. (Os07t0617100-01)
Os09g0488700	-1.09909	0.000936516	Conserved hypothetical protein. (Os09t0488700-01)
Os04g0419550	-1.09987	0.0276052	Zinc finger, RING-type domain containing protein. (Os04t0419550-01)
Os02g0223700	-1.10173	0.000326993	Protein of unknown function DUF3511 domain containing protein. (Os02t0223700-01)
Os09g0529350	-1.10204	0.0399078	Hypothetical conserved gene. (Os09t0529350-01)
Os01g0214800	-1.10441	0.00234323	Lipase, GDSL domain containing protein. (Os01t0214800-01);Similar to Esterase. (Os01t0214800-02);Similar to Esterase. (Os01t0214800-03)
Os05g0168500	-1.10674	0.0140424	Nonaspanin (TM9SF) family protein. (Os05t0168500-01);Similar to predicted protein. (Os05t0168500-02)
Os11g0570000	-1.10684	0.0341328	Similar to Receptor kinase-like protein. (Os11t0570000-01)
Os01g0314300	-1.10759	2.37e-05	Uncharacterized domain 2 containing protein. (Os01t0314300-01);Uncharacterized domain 2 containing protein. (Os01t0314300-02)
Os10g0553600	-1.11231	0.0213323	Exostosin-like family protein. (Os10t0553600-00)
Os03g0805600	-1.11294	0.0127961	Similar to pheophorbide a oxygenase. (Os03t0805600-00)
Os02g0769100	-1.1131	0.0377047	Auxin responsive SAUR protein family protein. (Os02t0769100-01)
Os04g0544500	-1.11342	0.00184396	Similar to Similarities with spP40209 Saccharomyces cerevisiae YMR136w GAT2. (Os04t0544500-01)
Os01g0827600	-1.11416	0.0391534	Exo70 exocyst complex subunit family protein. (Os01t0827600-01)
Os03g0819400	-1.11549	0.000346963	Heavy metal transport/detoxification protein domain containing protein. (Os03t0819400-01)
Os11g0657300	-1.11613	0.00047537	Similar to Small nuclear ribonucleoprotein F (snRNP-F) (Sm protein F) (Sm-F) (SmF). (Os11t0657300-01)
Os01g0190300	-1.11806	0.00189007	Similar to Auxin-responsive protein IAA26 (Indoleacetic acid-induced protein 26) (Phytochrome-associated protein 1). (Os01t0190300-01)
Os06g0699500	-1.11994	0.00616798	Tautomerase domain containing protein. (Os06t0699500-01);Tautomerase domain containing protein. (Os06t0699500-02)
Os01g0119500	-1.12028	0.000613207	Protein of unknown function DUF1618 domain containing protein. (Os01t0119500-01)
CAA33960	-1.12062	0.00366903	envelope membrane protein, chloroplastic [Source:UniProtKB/TrEMBL;Acc:E9KIQ0]
Os12g0271600	-1.1208	0.00264103	Similar to Myosin heavy chain-like. (Os12t0271600-01);Hypothetical conserved gene. (Os12t0271600-02)
Os03g0823500	-1.12118	0.00166157	TGF-beta receptor, type I/II extracellular region family protein. (Os03t0823500-02)
Os12g0640600	-1.1214	0.000119036	Similar to Carotenoid cleavage dioxygenase (Fragment). (Os12t0640600-01)
Os03g0588100	-1.12158	0.0473602	Hypothetical conserved gene. (Os03t0588100-01)
Os09g0130800	-1.1219	0.00104743	Similar to predicted protein. (Os09t0130800-01);DEAD-like helicase, N-terminal domain containing protein. (Os09t0130800-02);Similar to predicted protein. (Os09t0130800-03);Similar to predicted protein. (Os09t0130800-04)
Os05g0495000	-1.12392	0.0013123	Hypothetical conserved gene. (Os05t0495000-00)
Os01g0748900	-1.12534	0.0298199	Membrane attack complex component/perforin/complement C9 family protein. (Os01t0748900-01);Membrane attack complex component/perforin/complement C9 family protein. (Os01t0748900-02)
Os12g0581900	-1.12538	0.0345923	Zinc finger, C2H2-like domain containing protein. (Os12t0581900-01)
Os06g0286375	-1.12671	0.000133746	Similar to Nitrate-induced NOI protein-like protein. (Os06t0286375-00)
Os03g0857600	-1.12736	0.00866642	Protein of unknown function DUF303, acetylesterase putative domain containing protein. (Os03t0857600-01)
Os06g0274200	-1.12924	0.000895769	Similar to H/ACA ribonucleoprotein complex subunit 2 (H/ACA snoRNP protein NHP2) (High mobility group-like nuclear protein 2). (Os06t0274200-01)
Os07g0633800	-1.13287	0.000433845	Similar to BNS (BONSAI). (Os07t0633800-01)
Os03g0146300	-1.13418	0.00101417	Similar to Cyclin-dependent kinases regulatory subunit. (Os03t0146300-01)
Os05g0243200	-1.13481	0.0116235	Similar to Ribosomal protein L13. (Os05t0243200-01);Similar to 50S ribosomal protein L13. (Os05t0243200-02)
Os07g0181800	-1.13734	0.000145419	Protein of unknown function DUF2346 domain containing protein. (Os07t0181800-01)
Os05g0427100	-1.13826	0.0248825	Octicosapeptide/Phox/Bem1p domain containing protein. (Os05t0427100-01);Octicosapeptide/Phox/Bem1p domain containing protein. (Os05t0427100-02)
Os08g0161500	-1.13867	0.0136864	Alpha/beta hydrolase fold-1 domain containing protein. (Os08t0161500-01)
Os10g0539900	-1.13907	0.00954747	Tonoplast monosaccharide transpoter, Vacuolar sugar transport (Os10t0539900-01);Similar to Hexose transporter. (Os10t0539900-02);Similar to Hexose transporter. (Os10t0539900-03);Similar to Hexose transporter. (Os10t0539900-04)
Os08g0442300	-1.13992	0.00975415	Similar to Calcineurin subunit B. (Os08t0442300-01);Similar to Calcineurin subunit B. (Os08t0442300-02)
Os03g0575700	-1.14138	0.00760208	Conserved hypothetical protein. (Os03t0575700-01)
Os03g0747700	-1.14634	0.0487266	Similar to photosystem II 11 kDa protein-related. (Os03t0747700-01)
Os03g0231700	-1.14827	0.0041019	Similar to squalene monooxygenase. (Os03t0231700-01);Similar to Squalene monooxygenase 2 (EC 1.14.99.7). (Os03t0231700-02)
Os06g0713400	-1.15034	0.000300535	Cyclin-like F-box domain containing protein. (Os06t0713400-01)
Os06g0196600	-1.15147	0.00444467	Beta-ketoacyl-[acyl carrier protein] synthase I, Root development (Os06t0196600-01)
Os03g0823200	-1.1536	0.0228276	Similar to predicted protein. (Os03t0823200-01)
Os02g0169300	-1.15506	0.000197315	Similar to Phosphoglycerate kinase, cytosolic (EC 2.7.2.3). (Os02t0169300-01)
Os03g0559700	-1.15701	0.00187536	Conserved hypothetical protein. (Os03t0559700-00)
Os12g0576900	-1.1594	0.000135123	Similar to Diacylglycerol kinase 1 (EC 2.7.1.107) (Diglyceride kinase 1) (DGK 1) (DAG kinase 1). (Os12t0576900-01)
Os09g0354900	-1.15959	0.0157061	Conserved hypothetical protein. (Os09t0354900-01)
Os02g0767500	-1.16708	0.000296367	Mitochondrial phosphate transporter. (Os02t0767500-01)
Os03g0851900	-1.16985	0.000601677	ATPase, AFG1-like domain containing protein. (Os03t0851900-01);Similar to ATPase. (Os03t0851900-02)
Os01g0869200	-1.17073	0.00146233	Magnesium transporter, Mg-mediated aluminum tolerance (Os01t0869200-01)
Os01g0962600	-1.17224	0.000949682	Similar to 40S ribosomal protein S10-1. (Os01t0962600-01)
Os03g0795100	-1.17245	0.00105424	Conserved hypothetical protein. (Os03t0795100-01)
Os03g0833800	-1.1727	0.00129607	Pectin lyase fold/virulence factor domain containing protein. (Os03t0833800-01)
Os02g0678400	-1.17564	0.000469943	NAD(P)-binding domain containing protein. (Os02t0678400-01)
Os11g0549655	-1.17565	0.00331861	Similar to maf-like protein CV_0124. (Os11t0549655-01)
Os03g0407100	-1.17739	0.0219943	Protein of unknown function DUF1677, plant family protein. (Os03t0407100-00)
CAA34000	-1.1778	0.0143129	-
Os12g0133900	-1.17793	0.00307069	Similar to Epa4p. (Os12t0133900-01)
Os03g0385400	-1.18102	0.00410239	Bifunctional inhibitor/plant lipid transfer protein/seed storage domain containing protein. (Os03t0385400-01)
Os04g0182200	-1.18158	0.0143668	2OG-Fe(II) oxygenase domain containing protein. (Os04t0182200-01)
Os04g0218600	-1.18321	0.0440903	Conserved hypothetical protein. (Os04t0218600-01);Conserved hypothetical protein. (Os04t0218600-02)
Os12g0541200	-1.18363	0.00313764	Conserved hypothetical protein. (Os12t0541200-01);Conserved hypothetical protein. (Os12t0541200-02)
Os09g0453900	-1.18657	0.036515	MORN motif domain containing protein. (Os09t0453900-01);Similar to predicted protein. (Os09t0453900-02)
Os05g0341300	-1.18665	0.0119209	Similar to guanine nucleotide-binding protein alpha-1 subunit. (Os05t0341300-01)
Os03g0816200	-1.18737	0.00377182	Ribosomal protein S26e domain containing protein. (Os03t0816200-01)
Os08g0530400	-1.18982	0.00283696	Moco containing protein (Moco containing protein(OsMCP)). (Os08t0530400-01);Similar to sulfite oxidase. (Os08t0530400-02)
Os02g0122400	-1.19062	0.0111115	Similar to Plastid division protein. (Os02t0122400-01)
Os06g0564800	-1.19118	0.00712165	Similar to beta-1,4-mannosyltransferase. (Os06t0564800-01)
Os01g0275900	-1.1923	0.00347996	Hypothetical conserved gene. (Os01t0275900-00)
Os03g0726100	-1.19285	0.00164726	Similar to Tubulin alpha-1 chain (Alpha-1 tubulin). (Os03t0726100-01);Similar to Alpha-tubulin. (Os03t0726100-02)
Os04g0605200	-1.19375	0.0089328	Protein-tyrosine phosphatase, low molecular weight domain containing protein. (Os04t0605200-01)
Os07g0227800	-1.19867	0.00311007	Similar to ubiquinone biosynthesis protein ubiB. (Os07t0227800-00)
Os02g0804600	-1.19877	0.0235179	Similar to Adenylyltransferase and sulfurtransferase MOCS3. (Os02t0804600-00)
Os01g0841600	-1.19879	0.000395463	Triose phosphate isomerase (EC 5.3.1.1), Abiotic stress response, Response to methylglyoxal (cytotoxin) (Os01t0841600-01)
Os06g0502900	-1.20063	0.0268122	Similar to DGCR14 protein. (Os06t0502900-01);Similar to DGCR14 protein. (Os06t0502900-02)
Os05g0473500	-1.20076	0.0112516	Exo70 exocyst complex subunit family protein. (Os05t0473500-01);Similar to protein binding protein. (Os05t0473500-02)
Os05g0419500	-1.2013	0.000425026	K Homology domain containing protein. (Os05t0419500-01)
Os01g0228400	-1.20337	0.00582596	Pentatricopeptide repeat domain containing protein. (Os01t0228400-01)
Os01g0102300	-1.20409	0.0175068	Thylakoid lumen protein, Photosynthesis and chloroplast development (Os01t0102300-01)
Os09g0518500	-1.20562	0.0250211	Ankyrin repeat containing protein. (Os09t0518500-01);Similar to protein binding protein. (Os09t0518500-02);Similar to protein binding protein. (Os09t0518500-03)
Os12g0604300	-1.20581	0.00650212	Hypothetical gene. (Os12t0604300-01)
Os12g0613000	-1.20695	0.000122973	Similar to NF-YA subunit. (Os12t0613000-01)
Os06g0136300	-1.20736	0.0461894	Similar to OSIGBa0142C11.2 protein. (Os06t0136300-01)
Os05g0185800	-1.20806	0.000393908	Conserved hypothetical protein. (Os05t0185800-01)
Os02g0213100	-1.20871	0.0189277	Conserved hypothetical protein. (Os02t0213100-01)
Os10g0506800	-1.20877	0.00388725	SET domain containing protein. (Os10t0506800-01)
Os08g0265000	-1.20987	0.0194331	Hypothetical gene. (Os08t0265000-01)
Os10g0111800	-1.21163	0.0016711	Hypothetical protein. (Os10t0111800-01)
Os04g0457500	-1.21217	0.00272375	Similar to H0523F07.13 protein. (Os04t0457500-01)
Os07g0282300	-1.21229	0.00892716	Similar to Aldehyde oxidase 1 homolog (Fragment). (Os07t0282300-01)
Os02g0460200	-1.21275	0.0023947	Similar to OSIGBa0131F24.5 protein. (Os02t0460200-01);Similar to OSIGBa0131F24.5 protein. (Os02t0460200-02)
Os01g0955100	-1.21517	0.0275744	Similar to Calmodulin-like protein (Fragment). (Os01t0955100-01)
Os06g0147400	-1.21651	0.000337742	Conserved hypothetical protein. (Os06t0147400-01)
Os09g0465800	-1.21716	0.00536212	Legume lectin, beta domain domain containing protein. (Os09t0465800-01)
Os02g0234300	-1.21885	0.000575369	Armadillo-like helical domain containing protein. (Os02t0234300-01)
Os01g0622033	-1.21894	0.0143789	Hypothetical gene. (Os01t0622033-01)
Os04g0600400	-1.22016	0.00505055	Peptidase aspartic, catalytic domain containing protein. (Os04t0600400-01)
Os06g0536200	-1.22082	0.0323393	Hypothetical gene. (Os06t0536200-01)
Os11g0136800	-1.22127	0.00753621	Similar to predicted protein. (Os11t0136800-01);Similar to Dual specificity protein phosphatase 19 (EC 3.1.3.48) (EC 3.1.3.16) (Stress-activated protein kinase pathway-regulating phosphatase 1) (Protein phosphatase SKRP1). Splice isoform 2. (Os11t0136800-02)
Os06g0713100	-1.2233	0.00583162	Protein of unknown function DUF1640 family protein. (Os06t0713100-01)
Os01g0688000	-1.22388	0.00194293	Conserved hypothetical protein. (Os01t0688000-01)
Os01g0683700	-1.22488	0.0148065	Protein of unknown function DUF599 family protein. (Os01t0683700-01)
Os07g0616750	-1.22502	0.0102443	Hypothetical gene. (Os07t0616750-01)
Os11g0484500	-1.22512	0.000264759	Similar to 6-phosphogluconate dehydrogenase. (Os11t0484500-01);Similar to 6-phosphogluconate dehydrogenase, decarboxylating. (Os11t0484500-02)
Os01g0210600	-1.22917	0.00282414	Protein of unknown function DUF538 family protein. (Os01t0210600-02)
Os03g0265100	-1.2293	0.000122177	Glycosyl transferase, group 1 domain containing protein. (Os03t0265100-01)
Os07g0606600	-1.23167	0.00291918	Similar to Nuclear factor Y transcription factor subunit B homolog. (Os07t0606600-01)
Os03g0104100	-1.23283	0.0177385	Protein phosphatase 2C, N-terminal domain containing protein. (Os03t0104100-01)
Os12g0190100	-1.23494	0.00856917	Similar to Auxin-independent growth promoter-like protein. (Os12t0190100-01)
Os01g0684900	-1.23876	0.0472508	Multi antimicrobial extrusion protein MatE family protein. (Os01t0684900-01)
Os10g0469900	-1.24032	0.032741	TGF-beta receptor, type I/II extracellular region family protein. (Os10t0469900-01);Similar to peptide transporter PTR2. (Os10t0469900-02)
Os01g0727400	-1.24053	0.0317263	NADH:ubiquinone oxidoreductase complex I intermediate-associated protein 30 domain containing protein. (Os01t0727400-01)
Os01g0275600	-1.24067	0.00148493	Similar to Argonaute 4 protein. (Os01t0275600-01);Similar to Protein argonaute 4A. (Os01t0275600-02)
[truncated: 981 more rows]

## Sheet: Supplementary_table5
Supplementary_table 5 Differentially expressed genes shared between Hwaseong and CR2002 under dark treatment
[truncated: 7,903 more rows]

[truncated: 1 more sheets: Supplementary_table6]
